# Supplementary material for: FS-mutant: A Few-shot Learning Benchmark for Protein Mutants Mining
Source: Research Square preprint supplement (doi:10.21203/rs.3.rs-3987561/v1), 2024-02-28
Supplement: Supplementary file 1 [file 0451705226fd994e640d3020.xlsx]

## Sheet: Dataset
Id	Length	Number of Mutants	Positions
A4_HUMAN_Seuma_2021	770	1(468), 2(14015)	672-713
CAPSD_AAV2S_Sinai_substitutions_2021	735	1(532), 2(10833), 3(6906), 4(6646), 5(6298), 6(5396), 7(858), 8(739), 9(651), 10(583), 11(445), 12(407), 13(368), 14(328), 15(286), 16(236), 17(203), 18(159), 19(119), 20(93), 21(74), 22(56), 23(43), 24(29), 25(17), 26(12), 27(8), 28(3)	561-588
DLG4_HUMAN_Faure_2021	724	1(1280), 2(5696)	311-394
F7YBW8_MESOW_Aakre_2015	93	1(37), 2(499), 3(2798), 4(5858)	561-588
GCN4_YEAST_Staller_induction_2018	281	1(33), 2(55), 3(149), 4(380), 5(608), 6(406), 7(5), 8(14), 9(1), 10(1), 11(1), 12(2), 13(1), 14(3), 15(1), 16(5), 17(2), 20(2), 22(1), 23(1), 24(1), 26(1), 29(1), 31(3), 32(8), 33(17), 34(39), 35(80), 36(100), 37(146), 38(140), 39(124), 40(98), 41(80), 42(63), 43(54), 44(12)	101-144
GFP_AEQVI_Sarkisyan_2016	238	1(1084), 2(12777), 3(12336), 4(9387), 5(6825), 6(4298), 7(2526), 8(1364), 9(627), 10(299), 11(118), 12(43), 13(23), 14(5), 15(2)	3-118, 121-237
GRB2_HUMAN_Faure_2021	217	1(1034), 2(62332)	159-214
HIS7_YEAST_Pokusaeva_2019	220	1(168), 2(1475), 3(7627), 4(25927), 5(60263), 6(98869), 7(115751), 8(97639), 9(57139), 10(22942), 11(6370), 12(1354), 13(245), 14(71), 15(40), 16(39), 17(29), 18(35), 19(38), 20(24), 21(18), 22(16), 23(14), 24(16), 25(10), 26(11), 27(4), 28(3)	6-25, 50, 52-125, 136-211
PABP_YEAST_Melamed_2013	577	1(1187), 2(36521)	126-200
SPG1_STRSG_Olson_2014	448	1(1045), 2(535917)	228-282
YAP1_HUMAN_Araya_2012	504	1(362), 2(9713)	170-203
Id	Uniprot_ID	Name	Species	Function
A4_HUMAN_Seuma_2021	A4_HUMAN	Amyloid-beta precursor protein	Human	binding
CAPSD_AAV2S_Sinai_substitutions_2021	CAPSD_AAV2S	Capsid protein VP1	Virus	binding
DLG4_HUMAN_Faure_2021	DLG4_HUMAN	Disks large homolog 4	Human	binding
F7YBW8_MESOW_Aakre_2015	F7YBW8_MESOW	Addiction module antidote protein	Prokaryote	binding
GCN4_YEAST_Staller_induction_2018	GCN4_YEAST	General control transcription factor GCN4	Eukaryote	binding
GFP_AEQVI_Sarkisyan_2016	GFP_AEQVI	Green fluorescent protein	Eukaryote	fluorescene
GRB2_HUMAN_Faure_2021	GRB2_HUMAN	Growth factor receptor-bound protein 2	Human	binding
HIS7_YEAST_Pokusaeva_2019	HIS7_YEAST	Imidazoleglycerol-phosphate dehydratase	Eukaryote	Activity
PABP_YEAST_Melamed_2013	PABP_YEAST	Polyadenylate-binding protein	Eukaryote	binding
SPG1_STRSG_Olson_2014	SPG1_STRSG	Immunoglobulin G-binding protein G	Prokaryote	stability
YAP1_HUMAN_Araya_2012	YAP1_HUMAN	Transcriptional coactivator YAP1	Human	stability

## Sheet: Train-test
Id	Training Size		Split index
		Test set	1	2	3	4	5
A4_HUMAN_Seuma_2021	20	combined_multi	14	15	10	14	19
		cross_single	440	443	444	438	433
		local_single	28	25	24	30	35
	40	combined_multi	90	62	68	47	88
		cross_single	413	422	422	412	411
		local_single	55	46	46	56	57
	80	combined_multi	357	468	309	323	383
		cross_single	369	367	358	376	368
		local_single	99	101	110	92	100
	160	combined_multi	1547	1785	1545	1712	1552
		cross_single	281	266	263	281	282
		local_single	187	202	205	187	186
	320	combined_multi	5511	6542	6504	6715	6910
		cross_single	76	70	69	98	101
		local_single	392	398	399	370	367
CAPSD_AAV2S_Sinai_substitutions_2021	20	combined_multi	11	10	14	16	11
		cross_single	494	494	494	494	494
		local_single	38	38	38	38	38
	40	combined_multi	23	137	37	38	51
		cross_single	475	475	456	475	456
		local_single	57	57	76	57	76
	80	combined_multi	321	203	222	225	188
		cross_single	418	418	418	437	418
		local_single	114	114	114	95	114
	160	combined_multi	761	933	878	938	1005
		cross_single	323	323	323	342	323
		local_single	209	209	209	190	209
	320	combined_multi	8062	9698	7540	7963	6578
		cross_single	95	133	152	114	152
		local_single	437	399	380	418	380
DLG4_HUMAN_Faure_2021	20	combined_multi	13	11	13	12	13
		cross_single	1245	1248	1248	1247	1247
		local_single	35	32	32	33	33
	40	combined_multi	31	14	16	17	12
		cross_single	1228	1228	1233	1232	1212
		local_single	52	52	47	48	68
	80	combined_multi	46	39	49	28	38
		cross_single	1186	1160	1181	1170	1178
		local_single	94	120	99	110	102
	160	combined_multi	71	134	73	46	87
		cross_single	1081	1038	1061	1075	1096
		local_single	199	242	219	205	184
	320	combined_multi	338	479	471	295	420
		cross_single	866	886	891	887	874
		local_single	414	394	389	393	406
F7YBW8_MESOW_Aakre_2015	20	combined_multi	384	397	338	375	100
		cross_single	11	12	12	12	14
		local_single	26	25	25	25	23
GCN4_YEAST_Staller_induction_2018	20	cross_single	12	12	12	12	12
		local_single	21	21	21	21	21
GFP_AEQVI_Sarkisyan_2016	20	combined_multi	10	10	11	10	10
		cross_single	1059	1057	1056	1056	1057
		local_single	25	27	28	28	27
	40	combined_multi	16	24	11	23	16
		cross_single	1034	1040	1036	1042	1033
		local_single	50	44	48	42	51
	80	combined_multi	60	57	60	50	91
		cross_single	990	990	993	988	990
		local_single	94	94	91	96	94
	160	combined_multi	383	369	311	329	251
		cross_single	899	902	892	901	902
		local_single	185	182	192	183	182
	320	combined_multi	1250	1469	1417	1511	1325
		cross_single	716	721	720	711	711
		local_single	368	363	364	373	373
GRB2_HUMAN_Faure_2021	20	combined_multi	21	13	26	10	11
		cross_single	996	996	996	999	996
		local_single	38	38	38	35	38
	40	combined_multi	14	59	12	165	37
		cross_single	977	978	978	977	977
		local_single	57	56	56	57	57
	80	combined_multi	98	1043	299	481	82
		cross_single	921	920	920	923	924
		local_single	113	114	114	111	110
	160	combined_multi	757	693	1169	639	1223
		cross_single	826	828	830	829	826
		local_single	208	206	204	205	208
	320	combined_multi	3418	4801	4027	4655	3470
		cross_single	605	639	620	623	620
		local_single	429	395	414	411	414
HIS7_YEAST_Pokusaeva_2019	20	combined_multi	11	19	151	47	29
		cross_single	146	143	146	146	147
		local_single	22	25	22	22	21
	40	combined_multi	266	121	74	55	57
		cross_single	119	124	125	124	120
		local_single	49	44	43	44	48
	80	combined_multi	1787	1295	1068	1525	4035
		cross_single	78	75	81	77	79
		local_single	90	93	87	91	89
PABP_YEAST_Melamed_2013	20	combined_multi	14	16	14	11	18
		cross_single	1155	1155	1154	1155	1155
		local_single	32	32	33	32	32
	40	combined_multi	34	36	23	23	53
		cross_single	1140	1126	1139	1138	1109
		local_single	47	61	48	49	78
	80	combined_multi	94	137	75	124	234
		cross_single	1080	1085	1088	1089	1071
		local_single	107	102	99	98	116
	160	combined_multi	551	784	606	403	461
		cross_single	990	976	983	968	985
		local_single	197	211	204	219	202
	320	combined_multi	2667	2582	2470	2126	2664
		cross_single	787	784	803	774	770
		local_single	400	403	384	413	417
SPG1_STRSG_Olson_2014	20	combined_multi	51	75	99	96	75
		cross_single	1007	1007	1007	1007	1007
		local_single	38	38	38	38	38
	40	combined_multi	549	507	524	517	532
		cross_single	969	988	988	988	988
		local_single	76	57	57	57	57
	80	combined_multi	2591	2568	2578	2640	2643
		cross_single	931	931	931	931	931
		local_single	114	114	114	114	114
	160	combined_multi	11600	11608	11591	11481	11565
		cross_single	836	836	836	836	836
		local_single	209	209	209	209	209
	320	combined_multi	48743	48643	48730	48684	48616
		cross_single	627	646	627	646	627
		local_single	418	399	418	399	418
YAP1_HUMAN_Araya_2012	20	combined_multi	14	16	10	14	21
		cross_single	330	333	331	320	333
		local_single	32	29	31	42	29
	40	combined_multi	149	68	65	100	100
		cross_single	306	313	311	312	308
		local_single	56	49	51	50	54
	80	combined_multi	248	345	349	424	321
		cross_single	261	262	253	271	249
		local_single	101	100	109	91	113
	160	combined_multi	1554	1561	2008	1348	1598
		cross_single	162	167	165	147	160
		local_single	200	195	197	215	202

## Sheet: Spearman
	protein	data_size	split_index	metric_name	metric_value	test set	Model Type	Model
0	GFP_AEQVI_Sarkisyan_2016	80	3	spearman_r	0.442567	Compound-multi	Supervised	A-VAE
1	GRB2_HUMAN_Faure_2021	160	1	spearman_r	0.50751	Compound-multi	Supervised	A-VAE
2	DLG4_HUMAN_Faure_2021	20	2	spearman_r	0.748534	Local-single	Supervised	A-VAE
3	CAPSD_AAV2S_Sinai_substitutions_2021	160	2	spearman_r	0.626403	Compound-multi	Supervised	A-VAE
4	SPG1_STRSG_Olson_2014	40	2	spearman_r	0.618812	Compound-multi	Supervised	A-VAE
5	DLG4_HUMAN_Faure_2021	40	2	spearman_r	0.679121	Compound-multi	Supervised	A-VAE
6	CAPSD_AAV2S_Sinai_substitutions_2021	80	2	spearman_r	0.785448	Local-single	Supervised	A-VAE
7	GRB2_HUMAN_Faure_2021	160	1	spearman_r	0.736219	Local-single	Supervised	A-VAE
8	DLG4_HUMAN_Faure_2021	40	2	spearman_r	0.74285	Local-single	Supervised	A-VAE
9	DLG4_HUMAN_Faure_2021	20	2	spearman_r	0.0545455	Compound-multi	Supervised	A-VAE
10	CAPSD_AAV2S_Sinai_substitutions_2021	80	2	spearman_r	0.775736	Compound-multi	Supervised	A-VAE
11	DLG4_HUMAN_Faure_2021	80	2	spearman_r	0.367004	Compound-multi	Supervised	A-VAE
12	CAPSD_AAV2S_Sinai_substitutions_2021	40	2	spearman_r	0.747926	Local-single	Supervised	A-VAE
13	GRB2_HUMAN_Faure_2021	320	1	spearman_r	0.575691	Compound-multi	Supervised	A-VAE
14	DLG4_HUMAN_Faure_2021	80	2	spearman_r	0.612523	Local-single	Supervised	A-VAE
15	CAPSD_AAV2S_Sinai_substitutions_2021	40	2	spearman_r	0.0141598	Compound-multi	Supervised	A-VAE
16	SPG1_STRSG_Olson_2014	20	2	spearman_r	0.913269	Compound-multi	Supervised	A-VAE
17	DLG4_HUMAN_Faure_2021	160	2	spearman_r	0.688213	Compound-multi	Supervised	A-VAE
18	GRB2_HUMAN_Faure_2021	320	1	spearman_r	0.617005	Local-single	Supervised	A-VAE
19	SPG1_STRSG_Olson_2014	20	2	spearman_r	0.486815	Local-single	Supervised	A-VAE
20	CAPSD_AAV2S_Sinai_substitutions_2021	20	2	spearman_r	0.233395	Local-single	Supervised	A-VAE
21	CAPSD_AAV2S_Sinai_substitutions_2021	160	2	spearman_r	0.669375	Local-single	Supervised	A-VAE
22	DLG4_HUMAN_Faure_2021	320	1	spearman_r	0.622314	Local-single	Supervised	A-VAE
23	CAPSD_AAV2S_Sinai_substitutions_2021	40	3	spearman_r	0.833602	Local-single	Supervised	A-VAE
24	DLG4_HUMAN_Faure_2021	40	1	spearman_r	0.73491	Local-single	Supervised	A-VAE
25	DLG4_HUMAN_Faure_2021	80	1	spearman_r	0.702643	Compound-multi	Supervised	A-VAE
26	CAPSD_AAV2S_Sinai_substitutions_2021	40	3	spearman_r	0.894974	Compound-multi	Supervised	A-VAE
27	GRB2_HUMAN_Faure_2021	40	1	spearman_r	0.841522	Local-single	Supervised	A-VAE
28	SPG1_STRSG_Olson_2014	160	2	spearman_r	0.705439	Compound-multi	Supervised	A-VAE
29	DLG4_HUMAN_Faure_2021	80	1	spearman_r	0.80544	Local-single	Supervised	A-VAE
30	CAPSD_AAV2S_Sinai_substitutions_2021	20	3	spearman_r	0.383302	Local-single	Supervised	A-VAE
31	SPG1_STRSG_Olson_2014	40	2	spearman_r	0.869874	Local-single	Supervised	A-VAE
32	DLG4_HUMAN_Faure_2021	160	1	spearman_r	0.501207	Compound-multi	Supervised	A-VAE
33	CAPSD_AAV2S_Sinai_substitutions_2021	20	3	spearman_r	0.753846	Compound-multi	Supervised	A-VAE
34	SPG1_STRSG_Olson_2014	80	2	spearman_r	0.807628	Local-single	Supervised	A-VAE
35	DLG4_HUMAN_Faure_2021	160	1	spearman_r	0.676361	Local-single	Supervised	A-VAE
36	CAPSD_AAV2S_Sinai_substitutions_2021	320	2	spearman_r	0.765447	Local-single	Supervised	A-VAE
37	DLG4_HUMAN_Faure_2021	320	1	spearman_r	0.534168	Compound-multi	Supervised	A-VAE
38	SPG1_STRSG_Olson_2014	80	2	spearman_r	0.693272	Compound-multi	Supervised	A-VAE
39	GRB2_HUMAN_Faure_2021	80	1	spearman_r	0.68446	Local-single	Supervised	A-VAE
40	CAPSD_AAV2S_Sinai_substitutions_2021	320	2	spearman_r	0.48254	Compound-multi	Supervised	A-VAE
41	GRB2_HUMAN_Faure_2021	80	1	spearman_r	0.50824	Compound-multi	Supervised	A-VAE
42	DLG4_HUMAN_Faure_2021	160	2	spearman_r	0.683369	Local-single	Supervised	A-VAE
43	SPG1_STRSG_Olson_2014	320	1	spearman_r	0.50407	Local-single	Supervised	A-VAE
44	DLG4_HUMAN_Faure_2021	320	2	spearman_r	0.623298	Compound-multi	Supervised	A-VAE
45	DLG4_HUMAN_Faure_2021	160	3	spearman_r	0.650685	Compound-multi	Supervised	A-VAE
46	SPG1_STRSG_Olson_2014	80	1	spearman_r	0.689053	Compound-multi	Supervised	A-VAE
47	DLG4_HUMAN_Faure_2021	160	3	spearman_r	0.565054	Local-single	Supervised	A-VAE
48	GRB2_HUMAN_Faure_2021	80	2	spearman_r	0.75661	Compound-multi	Supervised	A-VAE
49	CAPSD_AAV2S_Sinai_substitutions_2021	40	1	spearman_r	0.586957	Compound-multi	Supervised	A-VAE
50	SPG1_STRSG_Olson_2014	40	1	spearman_r	0.622638	Local-single	Supervised	A-VAE
51	DLG4_HUMAN_Faure_2021	320	3	spearman_r	0.393451	Compound-multi	Supervised	A-VAE
52	CAPSD_AAV2S_Sinai_substitutions_2021	20	1	spearman_r	0.876135	Local-single	Supervised	A-VAE
53	CAPSD_AAV2S_Sinai_substitutions_2021	40	1	spearman_r	0.472518	Local-single	Supervised	A-VAE
54	DLG4_HUMAN_Faure_2021	320	3	spearman_r	0.652928	Local-single	Supervised	A-VAE
55	CAPSD_AAV2S_Sinai_substitutions_2021	20	1	spearman_r	0.4	Compound-multi	Supervised	A-VAE
56	SPG1_STRSG_Olson_2014	40	1	spearman_r	0.615062	Compound-multi	Supervised	A-VAE
57	DLG4_HUMAN_Faure_2021	20	4	spearman_r	0.797203	Compound-multi	Supervised	A-VAE
58	PABP_YEAST_Melamed_2013	320	5	spearman_r	0.693702	Local-single	Supervised	A-VAE
59	DLG4_HUMAN_Faure_2021	20	4	spearman_r	0.801136	Local-single	Supervised	A-VAE
60	GRB2_HUMAN_Faure_2021	160	2	spearman_r	0.609225	Compound-multi	Supervised	A-VAE
61	SPG1_STRSG_Olson_2014	20	1	spearman_r	0.860597	Local-single	Supervised	A-VAE
62	PABP_YEAST_Melamed_2013	320	5	spearman_r	0.64873	Compound-multi	Supervised	A-VAE
63	GRB2_HUMAN_Faure_2021	80	2	spearman_r	0.798424	Local-single	Supervised	A-VAE
64	GRB2_HUMAN_Faure_2021	40	2	spearman_r	0.83069	Local-single	Supervised	A-VAE
65	DLG4_HUMAN_Faure_2021	80	3	spearman_r	0.579716	Local-single	Supervised	A-VAE
66	CAPSD_AAV2S_Sinai_substitutions_2021	80	1	spearman_r	0.733322	Compound-multi	Supervised	A-VAE
67	CAPSD_AAV2S_Sinai_substitutions_2021	20	2	spearman_r	0.757576	Compound-multi	Supervised	A-VAE
68	GRB2_HUMAN_Faure_2021	20	2	spearman_r	0.851648	Compound-multi	Supervised	A-VAE
69	SPG1_STRSG_Olson_2014	320	1	spearman_r	0.476173	Compound-multi	Supervised	A-VAE
70	DLG4_HUMAN_Faure_2021	320	2	spearman_r	0.596579	Local-single	Supervised	A-VAE
71	CAPSD_AAV2S_Sinai_substitutions_2021	320	1	spearman_r	0.718264	Local-single	Supervised	A-VAE
72	DLG4_HUMAN_Faure_2021	20	3	spearman_r	0.868132	Compound-multi	Supervised	A-VAE
73	CAPSD_AAV2S_Sinai_substitutions_2021	320	1	spearman_r	0.631891	Compound-multi	Supervised	A-VAE
74	SPG1_STRSG_Olson_2014	160	1	spearman_r	0.687212	Local-single	Supervised	A-VAE
75	GRB2_HUMAN_Faure_2021	20	2	spearman_r	0.732575	Local-single	Supervised	A-VAE
76	DLG4_HUMAN_Faure_2021	20	3	spearman_r	0.748167	Local-single	Supervised	A-VAE
77	CAPSD_AAV2S_Sinai_substitutions_2021	160	1	spearman_r	0.690205	Local-single	Supervised	A-VAE
78	DLG4_HUMAN_Faure_2021	40	3	spearman_r	0.2	Compound-multi	Supervised	A-VAE
79	CAPSD_AAV2S_Sinai_substitutions_2021	160	1	spearman_r	0.622902	Compound-multi	Supervised	A-VAE
80	SPG1_STRSG_Olson_2014	160	1	spearman_r	0.697027	Compound-multi	Supervised	A-VAE
81	GRB2_HUMAN_Faure_2021	40	2	spearman_r	0.643717	Compound-multi	Supervised	A-VAE
82	DLG4_HUMAN_Faure_2021	40	3	spearman_r	0.67692	Local-single	Supervised	A-VAE
83	CAPSD_AAV2S_Sinai_substitutions_2021	80	1	spearman_r	0.876649	Local-single	Supervised	A-VAE
84	DLG4_HUMAN_Faure_2021	80	3	spearman_r	0.678061	Compound-multi	Supervised	A-VAE
85	SPG1_STRSG_Olson_2014	80	1	spearman_r	0.680738	Local-single	Supervised	A-VAE
86	SPG1_STRSG_Olson_2014	160	2	spearman_r	0.737371	Local-single	Supervised	A-VAE
87	DLG4_HUMAN_Faure_2021	40	4	spearman_r	0.102941	Compound-multi	Supervised	A-VAE
88	GRB2_HUMAN_Faure_2021	40	1	spearman_r	0.375824	Compound-multi	Supervised	A-VAE
89	DLG4_HUMAN_Faure_2021	40	1	spearman_r	0.644355	Compound-multi	Supervised	A-VAE
90	YAP1_HUMAN_Araya_2012	80	3	spearman_r	0.572996	Compound-multi	Supervised	A-VAE
91	CAPSD_AAV2S_Sinai_substitutions_2021	40	5	spearman_r	0.538428	Local-single	Supervised	A-VAE
92	YAP1_HUMAN_Araya_2012	80	3	spearman_r	0.792123	Local-single	Supervised	A-VAE
93	SPG1_STRSG_Olson_2014	320	3	spearman_r	0.535723	Local-single	Supervised	A-VAE
94	CAPSD_AAV2S_Sinai_substitutions_2021	40	5	spearman_r	0.533303	Compound-multi	Supervised	A-VAE
95	GFP_AEQVI_Sarkisyan_2016	40	5	spearman_r	0.297059	Compound-multi	Supervised	A-VAE
96	YAP1_HUMAN_Araya_2012	160	3	spearman_r	0.610856	Compound-multi	Supervised	A-VAE
97	CAPSD_AAV2S_Sinai_substitutions_2021	20	5	spearman_r	0.791443	Local-single	Supervised	A-VAE
98	GFP_AEQVI_Sarkisyan_2016	20	5	spearman_r	0.684982	Local-single	Supervised	A-VAE
99	SPG1_STRSG_Olson_2014	320	3	spearman_r	0.581846	Compound-multi	Supervised	A-VAE
100	CAPSD_AAV2S_Sinai_substitutions_2021	20	5	spearman_r	0.463636	Compound-multi	Supervised	A-VAE
101	GFP_AEQVI_Sarkisyan_2016	40	5	spearman_r	0.596833	Local-single	Supervised	A-VAE
102	YAP1_HUMAN_Araya_2012	20	4	spearman_r	0.27033	Compound-multi	Supervised	A-VAE
103	CAPSD_AAV2S_Sinai_substitutions_2021	320	4	spearman_r	0.757334	Local-single	Supervised	A-VAE
104	SPG1_STRSG_Olson_2014	160	3	spearman_r	0.665725	Local-single	Supervised	A-VAE
105	YAP1_HUMAN_Araya_2012	20	4	spearman_r	0.711531	Local-single	Supervised	A-VAE
106	GFP_AEQVI_Sarkisyan_2016	80	5	spearman_r	0.455996	Compound-multi	Supervised	A-VAE
107	CAPSD_AAV2S_Sinai_substitutions_2021	320	4	spearman_r	0.404572	Compound-multi	Supervised	A-VAE
108	YAP1_HUMAN_Araya_2012	160	3	spearman_r	0.78908	Local-single	Supervised	A-VAE
109	YAP1_HUMAN_Araya_2012	40	4	spearman_r	0.729133	Compound-multi	Supervised	A-VAE
110	SPG1_STRSG_Olson_2014	20	4	spearman_r	0.778497	Compound-multi	Supervised	A-VAE
111	CAPSD_AAV2S_Sinai_substitutions_2021	80	5	spearman_r	0.810694	Compound-multi	Supervised	A-VAE
112	SPG1_STRSG_Olson_2014	80	4	spearman_r	0.835276	Compound-multi	Supervised	A-VAE
113	YAP1_HUMAN_Araya_2012	80	2	spearman_r	0.717252	Local-single	Supervised	A-VAE
114	CAPSD_AAV2S_Sinai_substitutions_2021	320	5	spearman_r	0.687322	Local-single	Supervised	A-VAE
115	GFP_AEQVI_Sarkisyan_2016	320	4	spearman_r	0.520834	Compound-multi	Supervised	A-VAE
116	SPG1_STRSG_Olson_2014	40	4	spearman_r	0.803893	Local-single	Supervised	A-VAE
117	YAP1_HUMAN_Araya_2012	160	2	spearman_r	0.631668	Compound-multi	Supervised	A-VAE
118	CAPSD_AAV2S_Sinai_substitutions_2021	320	5	spearman_r	0.355039	Compound-multi	Supervised	A-VAE
119	YAP1_HUMAN_Araya_2012	160	2	spearman_r	0.811238	Local-single	Supervised	A-VAE
120	YAP1_HUMAN_Araya_2012	40	3	spearman_r	0.822805	Local-single	Supervised	A-VAE
121	GFP_AEQVI_Sarkisyan_2016	320	4	spearman_r	0.467642	Local-single	Supervised	A-VAE
122	SPG1_STRSG_Olson_2014	40	4	spearman_r	0.6017	Compound-multi	Supervised	A-VAE
123	YAP1_HUMAN_Araya_2012	20	3	spearman_r	0.466667	Compound-multi	Supervised	A-VAE
124	CAPSD_AAV2S_Sinai_substitutions_2021	160	5	spearman_r	0.751836	Compound-multi	Supervised	A-VAE
125	YAP1_HUMAN_Araya_2012	20	3	spearman_r	0.696774	Local-single	Supervised	A-VAE
126	GFP_AEQVI_Sarkisyan_2016	20	5	spearman_r	0.369697	Compound-multi	Supervised	A-VAE
127	SPG1_STRSG_Olson_2014	20	4	spearman_r	0.729377	Local-single	Supervised	A-VAE
128	CAPSD_AAV2S_Sinai_substitutions_2021	80	5	spearman_r	0.810705	Local-single	Supervised	A-VAE
129	YAP1_HUMAN_Araya_2012	40	3	spearman_r	0.445979	Compound-multi	Supervised	A-VAE
130	CAPSD_AAV2S_Sinai_substitutions_2021	160	5	spearman_r	0.811262	Local-single	Supervised	A-VAE
131	SPG1_STRSG_Olson_2014	160	3	spearman_r	0.699527	Compound-multi	Supervised	A-VAE
132	CAPSD_AAV2S_Sinai_substitutions_2021	160	4	spearman_r	0.744328	Local-single	Supervised	A-VAE
133	YAP1_HUMAN_Araya_2012	40	4	spearman_r	0.818103	Local-single	Supervised	A-VAE
134	SPG1_STRSG_Olson_2014	20	3	spearman_r	0.59361	Local-single	Supervised	A-VAE
135	YAP1_HUMAN_Araya_2012	80	5	spearman_r	0.710483	Compound-multi	Supervised	A-VAE
136	GFP_AEQVI_Sarkisyan_2016	320	5	spearman_r	0.444928	Local-single	Supervised	A-VAE
137	CAPSD_AAV2S_Sinai_substitutions_2021	320	3	spearman_r	0.753014	Local-single	Supervised	A-VAE
138	YAP1_HUMAN_Araya_2012	80	5	spearman_r	0.805285	Local-single	Supervised	A-VAE
139	CAPSD_AAV2S_Sinai_substitutions_2021	320	3	spearman_r	0.582497	Compound-multi	Supervised	A-VAE
140	SPG1_STRSG_Olson_2014	20	3	spearman_r	0.781502	Compound-multi	Supervised	A-VAE
141	YAP1_HUMAN_Araya_2012	160	5	spearman_r	0.604866	Compound-multi	Supervised	A-VAE
142	YAP1_HUMAN_Araya_2012	40	5	spearman_r	0.86659	Local-single	Supervised	A-VAE
143	GRB2_HUMAN_Faure_2021	20	1	spearman_r	0.471429	Compound-multi	Supervised	A-VAE
144	YAP1_HUMAN_Araya_2012	160	5	spearman_r	0.800194	Local-single	Supervised	A-VAE
145	SPG1_STRSG_Olson_2014	320	2	spearman_r	0.633019	Local-single	Supervised	A-VAE
146	CAPSD_AAV2S_Sinai_substitutions_2021	160	3	spearman_r	0.702798	Compound-multi	Supervised	A-VAE
147	DLG4_HUMAN_Faure_2021	20	1	spearman_r	0.43956	Compound-multi	Supervised	A-VAE
148	GRB2_HUMAN_Faure_2021	20	1	spearman_r	0.888172	Local-single	Supervised	A-VAE
149	CAPSD_AAV2S_Sinai_substitutions_2021	80	3	spearman_r	0.833863	Local-single	Supervised	A-VAE
150	SPG1_STRSG_Olson_2014	320	2	spearman_r	0.662373	Compound-multi	Supervised	A-VAE
151	DLG4_HUMAN_Faure_2021	20	1	spearman_r	0.848739	Local-single	Supervised	A-VAE
152	CAPSD_AAV2S_Sinai_substitutions_2021	160	3	spearman_r	0.766318	Local-single	Supervised	A-VAE
153	CAPSD_AAV2S_Sinai_substitutions_2021	20	4	spearman_r	0.455882	Compound-multi	Supervised	A-VAE
154	YAP1_HUMAN_Araya_2012	40	5	spearman_r	0.707915	Compound-multi	Supervised	A-VAE
155	GFP_AEQVI_Sarkisyan_2016	320	5	spearman_r	0.439717	Compound-multi	Supervised	A-VAE
156	GFP_AEQVI_Sarkisyan_2016	80	5	spearman_r	0.556002	Local-single	Supervised	A-VAE
157	YAP1_HUMAN_Araya_2012	80	4	spearman_r	0.605805	Compound-multi	Supervised	A-VAE
158	CAPSD_AAV2S_Sinai_substitutions_2021	160	4	spearman_r	0.557825	Compound-multi	Supervised	A-VAE
159	SPG1_STRSG_Olson_2014	80	3	spearman_r	0.745465	Local-single	Supervised	A-VAE
160	YAP1_HUMAN_Araya_2012	80	4	spearman_r	0.820131	Local-single	Supervised	A-VAE
161	CAPSD_AAV2S_Sinai_substitutions_2021	80	4	spearman_r	0.773488	Local-single	Supervised	A-VAE
162	GFP_AEQVI_Sarkisyan_2016	160	5	spearman_r	0.470475	Compound-multi	Supervised	A-VAE
163	YAP1_HUMAN_Araya_2012	160	4	spearman_r	0.593201	Compound-multi	Supervised	A-VAE
164	SPG1_STRSG_Olson_2014	80	3	spearman_r	0.850543	Compound-multi	Supervised	A-VAE
165	CAPSD_AAV2S_Sinai_substitutions_2021	80	4	spearman_r	0.72318	Compound-multi	Supervised	A-VAE
166	YAP1_HUMAN_Araya_2012	160	4	spearman_r	0.729995	Local-single	Supervised	A-VAE
167	CAPSD_AAV2S_Sinai_substitutions_2021	40	4	spearman_r	0.815206	Local-single	Supervised	A-VAE
168	GFP_AEQVI_Sarkisyan_2016	160	5	spearman_r	0.552885	Local-single	Supervised	A-VAE
169	SPG1_STRSG_Olson_2014	40	3	spearman_r	0.687257	Local-single	Supervised	A-VAE
170	YAP1_HUMAN_Araya_2012	20	5	spearman_r	0.603896	Compound-multi	Supervised	A-VAE
171	CAPSD_AAV2S_Sinai_substitutions_2021	40	4	spearman_r	0.713098	Compound-multi	Supervised	A-VAE
172	YAP1_HUMAN_Araya_2012	20	5	spearman_r	0.697537	Local-single	Supervised	A-VAE
173	SPG1_STRSG_Olson_2014	40	3	spearman_r	0.823535	Compound-multi	Supervised	A-VAE
174	CAPSD_AAV2S_Sinai_substitutions_2021	20	4	spearman_r	0.898019	Local-single	Supervised	A-VAE
175	CAPSD_AAV2S_Sinai_substitutions_2021	80	3	spearman_r	0.751655	Compound-multi	Supervised	A-VAE
176	PABP_YEAST_Melamed_2013	160	5	spearman_r	0.795994	Local-single	Supervised	A-VAE
177	DLG4_HUMAN_Faure_2021	40	4	spearman_r	0.801997	Local-single	Supervised	A-VAE
178	GRB2_HUMAN_Faure_2021	160	2	spearman_r	0.705693	Local-single	Supervised	A-VAE
179	PABP_YEAST_Melamed_2013	40	2	spearman_r	0.75669	Local-single	Supervised	A-VAE
180	GRB2_HUMAN_Faure_2021	160	4	spearman_r	0.635578	Compound-multi	Supervised	A-VAE
181	HIS7_YEAST_Pokusaeva_2019	40	2	spearman_r	0.328323	Compound-multi	Supervised	A-VAE
182	A4_HUMAN_Seuma_2021	40	3	spearman_r	0.581869	Local-single	Supervised	A-VAE
183	PABP_YEAST_Melamed_2013	40	2	spearman_r	0.856371	Compound-multi	Supervised	A-VAE
184	A4_HUMAN_Seuma_2021	80	3	spearman_r	0.621757	Compound-multi	Supervised	A-VAE
185	PABP_YEAST_Melamed_2013	20	2	spearman_r	0.542889	Local-single	Supervised	A-VAE
186	GRB2_HUMAN_Faure_2021	160	4	spearman_r	0.719484	Local-single	Supervised	A-VAE
187	A4_HUMAN_Seuma_2021	40	3	spearman_r	0.607131	Compound-multi	Supervised	A-VAE
188	HIS7_YEAST_Pokusaeva_2019	20	2	spearman_r	0.325385	Local-single	Supervised	A-VAE
189	PABP_YEAST_Melamed_2013	20	2	spearman_r	0.223529	Compound-multi	Supervised	A-VAE
190	A4_HUMAN_Seuma_2021	160	3	spearman_r	0.625294	Compound-multi	Supervised	A-VAE
191	PABP_YEAST_Melamed_2013	320	1	spearman_r	0.703256	Local-single	Supervised	A-VAE
192	GRB2_HUMAN_Faure_2021	320	4	spearman_r	0.641469	Compound-multi	Supervised	A-VAE
193	HIS7_YEAST_Pokusaeva_2019	20	2	spearman_r	0.310526	Compound-multi	Supervised	A-VAE
194	A4_HUMAN_Seuma_2021	160	3	spearman_r	0.568157	Local-single	Supervised	A-VAE
195	PABP_YEAST_Melamed_2013	320	1	spearman_r	0.656111	Compound-multi	Supervised	A-VAE
196	A4_HUMAN_Seuma_2021	320	3	spearman_r	0.590569	Compound-multi	Supervised	A-VAE
197	A4_HUMAN_Seuma_2021	80	3	spearman_r	0.598711	Local-single	Supervised	A-VAE
198	HIS7_YEAST_Pokusaeva_2019	80	1	spearman_r	0.375972	Local-single	Supervised	A-VAE
199	HIS7_YEAST_Pokusaeva_2019	40	2	spearman_r	0.377872	Local-single	Supervised	A-VAE
200	PABP_YEAST_Melamed_2013	80	2	spearman_r	0.730118	Compound-multi	Supervised	A-VAE
201	GRB2_HUMAN_Faure_2021	40	4	spearman_r	0.539492	Compound-multi	Supervised	A-VAE
202	A4_HUMAN_Seuma_2021	80	2	spearman_r	0.563832	Local-single	Supervised	A-VAE
203	PABP_YEAST_Melamed_2013	320	2	spearman_r	0.645141	Local-single	Supervised	A-VAE
204	HIS7_YEAST_Pokusaeva_2019	20	3	spearman_r	0.478293	Compound-multi	Supervised	A-VAE
205	A4_HUMAN_Seuma_2021	160	2	spearman_r	0.686823	Compound-multi	Supervised	A-VAE
206	PABP_YEAST_Melamed_2013	320	2	spearman_r	0.643688	Compound-multi	Supervised	A-VAE
207	GRB2_HUMAN_Faure_2021	40	4	spearman_r	0.818512	Local-single	Supervised	A-VAE
208	A4_HUMAN_Seuma_2021	160	2	spearman_r	0.614792	Local-single	Supervised	A-VAE
209	A4_HUMAN_Seuma_2021	20	3	spearman_r	0.742609	Local-single	Supervised	A-VAE
210	PABP_YEAST_Melamed_2013	160	2	spearman_r	0.638643	Local-single	Supervised	A-VAE
211	A4_HUMAN_Seuma_2021	320	2	spearman_r	0.605907	Compound-multi	Supervised	A-VAE
212	GRB2_HUMAN_Faure_2021	80	4	spearman_r	0.681316	Compound-multi	Supervised	A-VAE
213	PABP_YEAST_Melamed_2013	160	2	spearman_r	0.554557	Compound-multi	Supervised	A-VAE
214	A4_HUMAN_Seuma_2021	320	2	spearman_r	0.612746	Local-single	Supervised	A-VAE
215	PABP_YEAST_Melamed_2013	80	2	spearman_r	0.849421	Local-single	Supervised	A-VAE
216	HIS7_YEAST_Pokusaeva_2019	80	2	spearman_r	0.51232	Compound-multi	Supervised	A-VAE
217	A4_HUMAN_Seuma_2021	20	3	spearman_r	0.187879	Compound-multi	Supervised	A-VAE
218	GRB2_HUMAN_Faure_2021	80	4	spearman_r	0.797139	Local-single	Supervised	A-VAE
219	HIS7_YEAST_Pokusaeva_2019	80	2	spearman_r	0.28228	Local-single	Supervised	A-VAE
220	GRB2_HUMAN_Faure_2021	320	4	spearman_r	0.555372	Local-single	Supervised	A-VAE
221	PABP_YEAST_Melamed_2013	160	1	spearman_r	0.829896	Local-single	Supervised	A-VAE
222	A4_HUMAN_Seuma_2021	320	3	spearman_r	0.626187	Local-single	Supervised	A-VAE
223	HIS7_YEAST_Pokusaeva_2019	20	1	spearman_r	0.418182	Compound-multi	Supervised	A-VAE
224	A4_HUMAN_Seuma_2021	320	5	spearman_r	0.655651	Local-single	Supervised	A-VAE
225	A4_HUMAN_Seuma_2021	320	4	spearman_r	0.558109	Compound-multi	Supervised	A-VAE
226	GRB2_HUMAN_Faure_2021	80	5	spearman_r	0.331222	Compound-multi	Supervised	A-VAE
227	A4_HUMAN_Seuma_2021	320	4	spearman_r	0.569095	Local-single	Supervised	A-VAE
228	A4_HUMAN_Seuma_2021	320	5	spearman_r	0.573279	Compound-multi	Supervised	A-VAE
229	GRB2_HUMAN_Faure_2021	320	5	spearman_r	0.710374	Local-single	Supervised	A-VAE
230	A4_HUMAN_Seuma_2021	20	5	spearman_r	0.794737	Compound-multi	Supervised	A-VAE
231	A4_HUMAN_Seuma_2021	160	4	spearman_r	0.655559	Local-single	Supervised	A-VAE
232	A4_HUMAN_Seuma_2021	160	5	spearman_r	0.729319	Local-single	Supervised	A-VAE
233	A4_HUMAN_Seuma_2021	20	5	spearman_r	0.638936	Local-single	Supervised	A-VAE
234	GRB2_HUMAN_Faure_2021	80	5	spearman_r	0.782603	Local-single	Supervised	A-VAE
235	A4_HUMAN_Seuma_2021	160	5	spearman_r	0.576748	Compound-multi	Supervised	A-VAE
236	A4_HUMAN_Seuma_2021	40	5	spearman_r	0.663943	Compound-multi	Supervised	A-VAE
237	A4_HUMAN_Seuma_2021	80	5	spearman_r	0.741662	Local-single	Supervised	A-VAE
238	GRB2_HUMAN_Faure_2021	160	5	spearman_r	0.77571	Local-single	Supervised	A-VAE
239	A4_HUMAN_Seuma_2021	40	5	spearman_r	0.484379	Local-single	Supervised	A-VAE
240	GRB2_HUMAN_Faure_2021	160	5	spearman_r	0.641918	Compound-multi	Supervised	A-VAE
241	GRB2_HUMAN_Faure_2021	320	5	spearman_r	0.501582	Compound-multi	Supervised	A-VAE
242	GRB2_HUMAN_Faure_2021	40	5	spearman_r	0.783122	Local-single	Supervised	A-VAE
243	PABP_YEAST_Melamed_2013	20	1	spearman_r	0.661538	Compound-multi	Supervised	A-VAE
244	A4_HUMAN_Seuma_2021	160	4	spearman_r	0.642163	Compound-multi	Supervised	A-VAE
245	PABP_YEAST_Melamed_2013	160	1	spearman_r	0.764456	Compound-multi	Supervised	A-VAE
246	A4_HUMAN_Seuma_2021	20	4	spearman_r	0.859341	Compound-multi	Supervised	A-VAE
247	HIS7_YEAST_Pokusaeva_2019	80	1	spearman_r	0.170299	Compound-multi	Supervised	A-VAE
248	GRB2_HUMAN_Faure_2021	20	5	spearman_r	0.409091	Compound-multi	Supervised	A-VAE
249	A4_HUMAN_Seuma_2021	20	4	spearman_r	0.89188	Local-single	Supervised	A-VAE
250	PABP_YEAST_Melamed_2013	80	1	spearman_r	0.838849	Local-single	Supervised	A-VAE
251	HIS7_YEAST_Pokusaeva_2019	40	1	spearman_r	0.36398	Local-single	Supervised	A-VAE
252	A4_HUMAN_Seuma_2021	40	4	spearman_r	0.600139	Compound-multi	Supervised	A-VAE
253	PABP_YEAST_Melamed_2013	80	1	spearman_r	0.801845	Compound-multi	Supervised	A-VAE
254	A4_HUMAN_Seuma_2021	40	4	spearman_r	0.623582	Local-single	Supervised	A-VAE
255	GRB2_HUMAN_Faure_2021	20	5	spearman_r	0.794726	Local-single	Supervised	A-VAE
256	PABP_YEAST_Melamed_2013	40	1	spearman_r	0.91605	Local-single	Supervised	A-VAE
257	HIS7_YEAST_Pokusaeva_2019	40	1	spearman_r	0.745959	Compound-multi	Supervised	A-VAE
258	A4_HUMAN_Seuma_2021	80	4	spearman_r	0.534828	Compound-multi	Supervised	A-VAE
259	PABP_YEAST_Melamed_2013	40	1	spearman_r	0.692895	Compound-multi	Supervised	A-VAE
260	GRB2_HUMAN_Faure_2021	40	5	spearman_r	0.351826	Compound-multi	Supervised	A-VAE
261	A4_HUMAN_Seuma_2021	80	4	spearman_r	0.66042	Local-single	Supervised	A-VAE
262	PABP_YEAST_Melamed_2013	20	1	spearman_r	0.845674	Local-single	Supervised	A-VAE
263	HIS7_YEAST_Pokusaeva_2019	20	1	spearman_r	0.272727	Local-single	Supervised	A-VAE
264	A4_HUMAN_Seuma_2021	80	2	spearman_r	0.697223	Compound-multi	Supervised	A-VAE
265	PABP_YEAST_Melamed_2013	20	3	spearman_r	0.410989	Compound-multi	Supervised	A-VAE
266	HIS7_YEAST_Pokusaeva_2019	20	3	spearman_r	0.422925	Local-single	Supervised	A-VAE
267	A4_HUMAN_Seuma_2021	40	2	spearman_r	0.696824	Local-single	Supervised	A-VAE
268	GRB2_HUMAN_Faure_2021	20	3	spearman_r	0.686399	Local-single	Supervised	A-VAE
269	DLG4_HUMAN_Faure_2021	40	5	spearman_r	0.601399	Compound-multi	Supervised	A-VAE
270	PABP_YEAST_Melamed_2013	320	4	spearman_r	0.811803	Local-single	Supervised	A-VAE
271	HIS7_YEAST_Pokusaeva_2019	20	5	spearman_r	0.612987	Local-single	Supervised	A-VAE
272	DLG4_HUMAN_Faure_2021	40	5	spearman_r	0.76108	Local-single	Supervised	A-VAE
273	PABP_YEAST_Melamed_2013	320	4	spearman_r	0.779236	Compound-multi	Supervised	A-VAE
274	GRB2_HUMAN_Faure_2021	40	3	spearman_r	0.293706	Compound-multi	Supervised	A-VAE
275	DLG4_HUMAN_Faure_2021	80	5	spearman_r	0.639129	Compound-multi	Supervised	A-VAE
276	DLG4_HUMAN_Faure_2021	20	5	spearman_r	0.682152	Local-single	Supervised	A-VAE
277	HIS7_YEAST_Pokusaeva_2019	20	5	spearman_r	0.662888	Compound-multi	Supervised	A-VAE
278	DLG4_HUMAN_Faure_2021	80	5	spearman_r	0.668885	Local-single	Supervised	A-VAE
279	PABP_YEAST_Melamed_2013	160	4	spearman_r	0.770012	Compound-multi	Supervised	A-VAE
280	GRB2_HUMAN_Faure_2021	40	3	spearman_r	0.819549	Local-single	Supervised	A-VAE
281	HIS7_YEAST_Pokusaeva_2019	80	4	spearman_r	0.466699	Local-single	Supervised	A-VAE
282	DLG4_HUMAN_Faure_2021	160	5	spearman_r	0.639495	Compound-multi	Supervised	A-VAE
283	PABP_YEAST_Melamed_2013	80	4	spearman_r	0.859291	Local-single	Supervised	A-VAE
284	DLG4_HUMAN_Faure_2021	160	5	spearman_r	0.694193	Local-single	Supervised	A-VAE
285	GRB2_HUMAN_Faure_2021	80	3	spearman_r	0.703116	Compound-multi	Supervised	A-VAE
286	PABP_YEAST_Melamed_2013	160	4	spearman_r	0.736824	Local-single	Supervised	A-VAE
287	PABP_YEAST_Melamed_2013	20	5	spearman_r	0.636739	Compound-multi	Supervised	A-VAE
288	HIS7_YEAST_Pokusaeva_2019	40	5	spearman_r	0.395346	Compound-multi	Supervised	A-VAE
289	DLG4_HUMAN_Faure_2021	20	5	spearman_r	0.791209	Compound-multi	Supervised	A-VAE
290	SPG1_STRSG_Olson_2014	20	1	spearman_r	0.867964	Compound-multi	Supervised	A-VAE
291	DLG4_HUMAN_Faure_2021	80	4	spearman_r	0.313082	Compound-multi	Supervised	A-VAE
292	PABP_YEAST_Melamed_2013	160	5	spearman_r	0.714283	Compound-multi	Supervised	A-VAE
293	DLG4_HUMAN_Faure_2021	80	4	spearman_r	0.617483	Local-single	Supervised	A-VAE
294	PABP_YEAST_Melamed_2013	80	5	spearman_r	0.608342	Local-single	Supervised	A-VAE
295	HIS7_YEAST_Pokusaeva_2019	80	5	spearman_r	0.314402	Local-single	Supervised	A-VAE
296	GRB2_HUMAN_Faure_2021	320	2	spearman_r	0.627199	Compound-multi	Supervised	A-VAE
297	DLG4_HUMAN_Faure_2021	160	4	spearman_r	0.0529238	Compound-multi	Supervised	A-VAE
298	PABP_YEAST_Melamed_2013	80	5	spearman_r	0.598662	Compound-multi	Supervised	A-VAE
299	HIS7_YEAST_Pokusaeva_2019	80	5	spearman_r	0.744874	Compound-multi	Supervised	A-VAE
300	DLG4_HUMAN_Faure_2021	160	4	spearman_r	0.696521	Local-single	Supervised	A-VAE
301	GRB2_HUMAN_Faure_2021	320	2	spearman_r	0.70358	Local-single	Supervised	A-VAE
302	PABP_YEAST_Melamed_2013	40	5	spearman_r	0.731357	Local-single	Supervised	A-VAE
303	DLG4_HUMAN_Faure_2021	320	4	spearman_r	0.668448	Compound-multi	Supervised	A-VAE
304	PABP_YEAST_Melamed_2013	40	5	spearman_r	0.442509	Compound-multi	Supervised	A-VAE
305	HIS7_YEAST_Pokusaeva_2019	40	5	spearman_r	0.216023	Local-single	Supervised	A-VAE
306	DLG4_HUMAN_Faure_2021	320	4	spearman_r	0.655959	Local-single	Supervised	A-VAE
307	GRB2_HUMAN_Faure_2021	20	3	spearman_r	0.796239	Compound-multi	Supervised	A-VAE
308	PABP_YEAST_Melamed_2013	20	5	spearman_r	0.572214	Local-single	Supervised	A-VAE
309	HIS7_YEAST_Pokusaeva_2019	80	4	spearman_r	0.28621	Compound-multi	Supervised	A-VAE
310	YAP1_HUMAN_Araya_2012	80	2	spearman_r	0.535345	Compound-multi	Supervised	A-VAE
311	PABP_YEAST_Melamed_2013	80	4	spearman_r	0.662438	Compound-multi	Supervised	A-VAE
312	PABP_YEAST_Melamed_2013	40	4	spearman_r	0.757143	Local-single	Supervised	A-VAE
313	PABP_YEAST_Melamed_2013	160	3	spearman_r	0.680541	Compound-multi	Supervised	A-VAE
314	A4_HUMAN_Seuma_2021	160	1	spearman_r	0.647745	Local-single	Supervised	A-VAE
315	A4_HUMAN_Seuma_2021	320	1	spearman_r	0.589663	Compound-multi	Supervised	A-VAE
316	GRB2_HUMAN_Faure_2021	320	3	spearman_r	0.572037	Local-single	Supervised	A-VAE
317	PABP_YEAST_Melamed_2013	80	3	spearman_r	0.775696	Local-single	Supervised	A-VAE
318	HIS7_YEAST_Pokusaeva_2019	80	3	spearman_r	0.569452	Compound-multi	Supervised	A-VAE
319	A4_HUMAN_Seuma_2021	320	1	spearman_r	0.628577	Local-single	Supervised	A-VAE
320	PABP_YEAST_Melamed_2013	80	3	spearman_r	0.814794	Compound-multi	Supervised	A-VAE
321	HIS7_YEAST_Pokusaeva_2019	80	3	spearman_r	0.38126	Local-single	Supervised	A-VAE
322	A4_HUMAN_Seuma_2021	20	2	spearman_r	0.685714	Compound-multi	Supervised	A-VAE
323	PABP_YEAST_Melamed_2013	40	3	spearman_r	0.812527	Local-single	Supervised	A-VAE
324	HIS7_YEAST_Pokusaeva_2019	40	3	spearman_r	0.625793	Local-single	Supervised	A-VAE
325	A4_HUMAN_Seuma_2021	20	2	spearman_r	0.776154	Local-single	Supervised	A-VAE
326	PABP_YEAST_Melamed_2013	40	3	spearman_r	0.507905	Compound-multi	Supervised	A-VAE
327	A4_HUMAN_Seuma_2021	40	2	spearman_r	0.622674	Compound-multi	Supervised	A-VAE
328	HIS7_YEAST_Pokusaeva_2019	40	3	spearman_r	0.152255	Compound-multi	Supervised	A-VAE
329	GRB2_HUMAN_Faure_2021	20	4	spearman_r	0.745098	Local-single	Supervised	A-VAE
330	PABP_YEAST_Melamed_2013	20	3	spearman_r	0.582553	Local-single	Supervised	A-VAE
331	GRB2_HUMAN_Faure_2021	20	4	spearman_r	0.806061	Compound-multi	Supervised	A-VAE
332	GRB2_HUMAN_Faure_2021	320	3	spearman_r	0.500245	Compound-multi	Supervised	A-VAE
333	A4_HUMAN_Seuma_2021	160	1	spearman_r	0.575264	Compound-multi	Supervised	A-VAE
334	PABP_YEAST_Melamed_2013	160	3	spearman_r	0.790968	Local-single	Supervised	A-VAE
335	DLG4_HUMAN_Faure_2021	320	5	spearman_r	0.636124	Local-single	Supervised	A-VAE
336	HIS7_YEAST_Pokusaeva_2019	40	4	spearman_r	0.438337	Local-single	Supervised	A-VAE
337	GRB2_HUMAN_Faure_2021	80	3	spearman_r	0.607679	Local-single	Supervised	A-VAE
338	A4_HUMAN_Seuma_2021	20	1	spearman_r	0.736264	Compound-multi	Supervised	A-VAE
339	PABP_YEAST_Melamed_2013	40	4	spearman_r	0.765505	Compound-multi	Supervised	A-VAE
340	A4_HUMAN_Seuma_2021	20	1	spearman_r	0.702791	Local-single	Supervised	A-VAE
341	PABP_YEAST_Melamed_2013	20	4	spearman_r	0.866569	Local-single	Supervised	A-VAE
342	HIS7_YEAST_Pokusaeva_2019	40	4	spearman_r	0.226623	Compound-multi	Supervised	A-VAE
343	A4_HUMAN_Seuma_2021	40	1	spearman_r	0.692094	Compound-multi	Supervised	A-VAE
344	GRB2_HUMAN_Faure_2021	160	3	spearman_r	0.655955	Compound-multi	Supervised	A-VAE
345	PABP_YEAST_Melamed_2013	20	4	spearman_r	0.718182	Compound-multi	Supervised	A-VAE
346	A4_HUMAN_Seuma_2021	40	1	spearman_r	0.666522	Local-single	Supervised	A-VAE
347	HIS7_YEAST_Pokusaeva_2019	20	4	spearman_r	0.346132	Local-single	Supervised	A-VAE
348	PABP_YEAST_Melamed_2013	320	3	spearman_r	0.658271	Local-single	Supervised	A-VAE
349	GRB2_HUMAN_Faure_2021	160	3	spearman_r	0.640049	Local-single	Supervised	A-VAE
350	A4_HUMAN_Seuma_2021	80	1	spearman_r	0.550791	Compound-multi	Supervised	A-VAE
351	PABP_YEAST_Melamed_2013	320	3	spearman_r	0.606499	Compound-multi	Supervised	A-VAE
352	HIS7_YEAST_Pokusaeva_2019	20	4	spearman_r	0.0846438	Compound-multi	Supervised	A-VAE
353	A4_HUMAN_Seuma_2021	80	1	spearman_r	0.538813	Local-single	Supervised	A-VAE
354	DLG4_HUMAN_Faure_2021	320	5	spearman_r	0.750854	Compound-multi	Supervised	A-VAE
355	GFP_AEQVI_Sarkisyan_2016	20	1	spearman_r	0.660606	Compound-multi	Supervised	A-VAE
356	A4_HUMAN_Seuma_2021	80	5	spearman_r	0.637048	Compound-multi	Supervised	A-VAE
357	SPG1_STRSG_Olson_2014	160	5	spearman_r	0.699215	Compound-multi	Supervised	A-VAE
358	YAP1_HUMAN_Araya_2012	80	1	spearman_r	0.827793	Local-single	Supervised	A-VAE
359	GFP_AEQVI_Sarkisyan_2016	80	4	spearman_r	0.430012	Compound-multi	Supervised	A-VAE
360	GFP_AEQVI_Sarkisyan_2016	320	3	spearman_r	0.528167	Local-single	Supervised	A-VAE
361	GFP_AEQVI_Sarkisyan_2016	160	4	spearman_r	0.438852	Compound-multi	Supervised	A-VAE
362	GFP_AEQVI_Sarkisyan_2016	40	4	spearman_r	0.802372	Compound-multi	Supervised	A-VAE
363	SPG1_STRSG_Olson_2014	40	5	spearman_r	0.792843	Compound-multi	Supervised	A-VAE
364	GFP_AEQVI_Sarkisyan_2016	20	2	spearman_r	0.442424	Compound-multi	Supervised	A-VAE
365	F7YBW8_MESOW_Aakre_2015	20	3	spearman_r	0.541538	Local-single	Supervised	A-VAE
366	GFP_AEQVI_Sarkisyan_2016	160	1	spearman_r	0.437293	Compound-multi	Supervised	A-VAE
367	GFP_AEQVI_Sarkisyan_2016	80	4	spearman_r	0.572097	Local-single	Supervised	A-VAE
368	GCN4_YEAST_Staller_induction_2018	20	3	spearman_r	0.409091	Local-single	Supervised	A-VAE
369	GFP_AEQVI_Sarkisyan_2016	160	3	spearman_r	0.376651	Compound-multi	Supervised	A-VAE
370	F7YBW8_MESOW_Aakre_2015	20	5	spearman_r	0.285377	Compound-multi	Supervised	A-VAE
371	F7YBW8_MESOW_Aakre_2015	20	4	spearman_r	0.478349	Compound-multi	Supervised	A-VAE
372	F7YBW8_MESOW_Aakre_2015	20	2	spearman_r	0.487726	Compound-multi	Supervised	A-VAE
373	F7YBW8_MESOW_Aakre_2015	20	1	spearman_r	0.640608	Compound-multi	Supervised	A-VAE
374	GFP_AEQVI_Sarkisyan_2016	160	2	spearman_r	0.520639	Compound-multi	Supervised	A-VAE
375	GFP_AEQVI_Sarkisyan_2016	40	2	spearman_r	0.393913	Compound-multi	Supervised	A-VAE
376	GCN4_YEAST_Staller_induction_2018	20	1	spearman_r	0.54026	Local-single	Supervised	A-VAE
377	SPG1_STRSG_Olson_2014	80	4	spearman_r	0.787942	Local-single	Supervised	A-VAE
378	GFP_AEQVI_Sarkisyan_2016	80	2	spearman_r	0.293168	Compound-multi	Supervised	A-VAE
379	YAP1_HUMAN_Araya_2012	20	1	spearman_r	0.729106	Local-single	Supervised	A-VAE
380	SPG1_STRSG_Olson_2014	160	5	spearman_r	0.524777	Local-single	Supervised	A-VAE
381	GFP_AEQVI_Sarkisyan_2016	320	2	spearman_r	0.383465	Compound-multi	Supervised	A-VAE
382	GFP_AEQVI_Sarkisyan_2016	40	1	spearman_r	0.432353	Compound-multi	Supervised	A-VAE
383	F7YBW8_MESOW_Aakre_2015	20	4	spearman_r	0.575385	Local-single	Supervised	A-VAE
384	GFP_AEQVI_Sarkisyan_2016	40	2	spearman_r	0.600846	Local-single	Supervised	A-VAE
385	YAP1_HUMAN_Araya_2012	40	1	spearman_r	0.732062	Compound-multi	Supervised	A-VAE
386	F7YBW8_MESOW_Aakre_2015	20	1	spearman_r	0.70735	Local-single	Supervised	A-VAE
387	GFP_AEQVI_Sarkisyan_2016	320	1	spearman_r	0.476757	Local-single	Supervised	A-VAE
388	YAP1_HUMAN_Araya_2012	40	2	spearman_r	0.631599	Compound-multi	Supervised	A-VAE
389	SPG1_STRSG_Olson_2014	20	5	spearman_r	0.743272	Compound-multi	Supervised	A-VAE
390	SPG1_STRSG_Olson_2014	80	5	spearman_r	0.67303	Compound-multi	Supervised	A-VAE
391	GFP_AEQVI_Sarkisyan_2016	20	3	spearman_r	0.536364	Compound-multi	Supervised	A-VAE
392	GFP_AEQVI_Sarkisyan_2016	160	1	spearman_r	0.543169	Local-single	Supervised	A-VAE
393	GCN4_YEAST_Staller_induction_2018	20	5	spearman_r	0.562338	Local-single	Supervised	A-VAE
394	YAP1_HUMAN_Araya_2012	80	1	spearman_r	0.514604	Compound-multi	Supervised	A-VAE
395	SPG1_STRSG_Olson_2014	320	4	spearman_r	0.703063	Local-single	Supervised	A-VAE
396	GFP_AEQVI_Sarkisyan_2016	80	3	spearman_r	0.337856	Local-single	Supervised	A-VAE
397	SPG1_STRSG_Olson_2014	320	4	spearman_r	0.653389	Compound-multi	Supervised	A-VAE
398	YAP1_HUMAN_Araya_2012	20	2	spearman_r	0.167647	Compound-multi	Supervised	A-VAE
399	F7YBW8_MESOW_Aakre_2015	20	3	spearman_r	0.448743	Compound-multi	Supervised	A-VAE
400	GFP_AEQVI_Sarkisyan_2016	80	1	spearman_r	0.395499	Compound-multi	Supervised	A-VAE
401	GFP_AEQVI_Sarkisyan_2016	80	2	spearman_r	0.36085	Local-single	Supervised	A-VAE
402	YAP1_HUMAN_Araya_2012	160	1	spearman_r	0.791166	Local-single	Supervised	A-VAE
403	YAP1_HUMAN_Araya_2012	40	2	spearman_r	0.834286	Local-single	Supervised	A-VAE
404	GCN4_YEAST_Staller_induction_2018	20	4	spearman_r	0.561039	Local-single	Supervised	A-VAE
405	GFP_AEQVI_Sarkisyan_2016	40	4	spearman_r	0.728385	Local-single	Supervised	A-VAE
406	GFP_AEQVI_Sarkisyan_2016	160	2	spearman_r	0.534158	Local-single	Supervised	A-VAE
407	YAP1_HUMAN_Araya_2012	40	1	spearman_r	0.744703	Local-single	Supervised	A-VAE
408	SPG1_STRSG_Olson_2014	160	4	spearman_r	0.651905	Compound-multi	Supervised	A-VAE
409	SPG1_STRSG_Olson_2014	80	5	spearman_r	0.830564	Local-single	Supervised	A-VAE
410	GFP_AEQVI_Sarkisyan_2016	320	3	spearman_r	0.459445	Compound-multi	Supervised	A-VAE
411	SPG1_STRSG_Olson_2014	320	5	spearman_r	0.599541	Compound-multi	Supervised	A-VAE
412	GFP_AEQVI_Sarkisyan_2016	40	3	spearman_r	0.367347	Local-single	Supervised	A-VAE
413	F7YBW8_MESOW_Aakre_2015	20	5	spearman_r	0.859684	Local-single	Supervised	A-VAE
414	F7YBW8_MESOW_Aakre_2015	20	2	spearman_r	0.633077	Local-single	Supervised	A-VAE
415	YAP1_HUMAN_Araya_2012	160	1	spearman_r	0.61922	Compound-multi	Supervised	A-VAE
416	GFP_AEQVI_Sarkisyan_2016	20	4	spearman_r	0.600985	Local-single	Supervised	A-VAE
417	GFP_AEQVI_Sarkisyan_2016	160	3	spearman_r	0.423846	Local-single	Supervised	A-VAE
418	SPG1_STRSG_Olson_2014	320	5	spearman_r	0.516245	Local-single	Supervised	A-VAE
419	SPG1_STRSG_Olson_2014	20	5	spearman_r	0.858847	Local-single	Supervised	A-VAE
420	GCN4_YEAST_Staller_induction_2018	20	2	spearman_r	0.614286	Local-single	Supervised	A-VAE
421	GFP_AEQVI_Sarkisyan_2016	20	2	spearman_r	0.81685	Local-single	Supervised	A-VAE
422	GFP_AEQVI_Sarkisyan_2016	80	1	spearman_r	0.496124	Local-single	Supervised	A-VAE
423	GFP_AEQVI_Sarkisyan_2016	160	4	spearman_r	0.534477	Local-single	Supervised	A-VAE
424	SPG1_STRSG_Olson_2014	40	5	spearman_r	0.853513	Local-single	Supervised	A-VAE
425	GFP_AEQVI_Sarkisyan_2016	20	4	spearman_r	0.69697	Compound-multi	Supervised	A-VAE
426	SPG1_STRSG_Olson_2014	160	4	spearman_r	0.677724	Local-single	Supervised	A-VAE
427	GFP_AEQVI_Sarkisyan_2016	320	1	spearman_r	0.492226	Compound-multi	Supervised	A-VAE
428	GFP_AEQVI_Sarkisyan_2016	40	3	spearman_r	0.181818	Compound-multi	Supervised	A-VAE
429	GFP_AEQVI_Sarkisyan_2016	40	1	spearman_r	0.486867	Local-single	Supervised	A-VAE
430	YAP1_HUMAN_Araya_2012	20	1	spearman_r	0.569231	Compound-multi	Supervised	A-VAE
431	YAP1_HUMAN_Araya_2012	20	2	spearman_r	0.733005	Local-single	Supervised	A-VAE
432	GFP_AEQVI_Sarkisyan_2016	20	1	spearman_r	0.723077	Local-single	Supervised	A-VAE
433	GFP_AEQVI_Sarkisyan_2016	20	3	spearman_r	0.550082	Local-single	Supervised	A-VAE
434	GFP_AEQVI_Sarkisyan_2016	320	2	spearman_r	0.370097	Local-single	Supervised	A-VAE
435	HIS7_YEAST_Pokusaeva_2019	20	5	spearman_r	0.758502	Compound-multi	Zero Shot	AlphaMissense
436	YAP1_HUMAN_Araya_2012	80	1	spearman_r	0.387887	Compound-multi	Zero Shot	AlphaMissense
437	PABP_YEAST_Melamed_2013	160	4	spearman_r	0.763321	Local-single	Zero Shot	AlphaMissense
438	DLG4_HUMAN_Faure_2021	320	5	spearman_r	0.6673	Compound-multi	Zero Shot	AlphaMissense
439	SPG1_STRSG_Olson_2014	320	4	spearman_r	0.556841	Local-single	Zero Shot	AlphaMissense
440	DLG4_HUMAN_Faure_2021	20	2	spearman_r	0.0272727	Compound-multi	Zero Shot	AlphaMissense
441	CAPSD_AAV2S_Sinai_substitutions_2021	20	3	spearman_r	0.178685	Local-single	Zero Shot	AlphaMissense
442	DLG4_HUMAN_Faure_2021	160	1	spearman_r	0.388397	Compound-multi	Zero Shot	AlphaMissense
443	A4_HUMAN_Seuma_2021	80	4	spearman_r	0.0392245	Local-single	Zero Shot	AlphaMissense
444	PABP_YEAST_Melamed_2013	80	4	spearman_r	0.358741	Compound-multi	Zero Shot	AlphaMissense
445	HIS7_YEAST_Pokusaeva_2019	80	4	spearman_r	0.388792	Compound-multi	Zero Shot	AlphaMissense
446	DLG4_HUMAN_Faure_2021	160	5	spearman_r	0.542132	Compound-multi	Zero Shot	AlphaMissense
447	DLG4_HUMAN_Faure_2021	320	5	spearman_r	0.516066	Local-single	Zero Shot	AlphaMissense
448	GFP_AEQVI_Sarkisyan_2016	160	1	spearman_r	0.659651	Local-single	Zero Shot	AlphaMissense
449	F7YBW8_MESOW_Aakre_2015	20	3	spearman_r	0.393846	Local-single	Zero Shot	AlphaMissense
450	GRB2_HUMAN_Faure_2021	80	1	spearman_r	0.384185	Compound-multi	Zero Shot	AlphaMissense
451	DLG4_HUMAN_Faure_2021	80	5	spearman_r	0.373054	Local-single	Zero Shot	AlphaMissense
452	CAPSD_AAV2S_Sinai_substitutions_2021	320	2	spearman_r	0.392606	Compound-multi	Zero Shot	AlphaMissense
453	A4_HUMAN_Seuma_2021	320	5	spearman_r	0.483121	Compound-multi	Zero Shot	AlphaMissense
454	DLG4_HUMAN_Faure_2021	160	5	spearman_r	0.558916	Local-single	Zero Shot	AlphaMissense
455	HIS7_YEAST_Pokusaeva_2019	80	4	spearman_r	0.0361045	Local-single	Zero Shot	AlphaMissense
456	DLG4_HUMAN_Faure_2021	320	1	spearman_r	0.545345	Local-single	Zero Shot	AlphaMissense
457	GRB2_HUMAN_Faure_2021	40	5	spearman_r	0.267425	Compound-multi	Zero Shot	AlphaMissense
458	CAPSD_AAV2S_Sinai_substitutions_2021	20	3	spearman_r	0.116484	Compound-multi	Zero Shot	AlphaMissense
459	GRB2_HUMAN_Faure_2021	40	3	spearman_r	0.702529	Local-single	Zero Shot	AlphaMissense
460	DLG4_HUMAN_Faure_2021	320	1	spearman_r	0.46799	Compound-multi	Zero Shot	AlphaMissense
461	GFP_AEQVI_Sarkisyan_2016	80	2	spearman_r	0.620706	Local-single	Zero Shot	AlphaMissense
462	GRB2_HUMAN_Faure_2021	80	1	spearman_r	0.479764	Local-single	Zero Shot	AlphaMissense
463	SPG1_STRSG_Olson_2014	80	2	spearman_r	0.523113	Local-single	Zero Shot	AlphaMissense
464	DLG4_HUMAN_Faure_2021	160	1	spearman_r	0.404868	Local-single	Zero Shot	AlphaMissense
465	CAPSD_AAV2S_Sinai_substitutions_2021	320	2	spearman_r	0.676281	Local-single	Zero Shot	AlphaMissense
466	GRB2_HUMAN_Faure_2021	80	3	spearman_r	0.150658	Compound-multi	Zero Shot	AlphaMissense
467	SPG1_STRSG_Olson_2014	80	2	spearman_r	0.531993	Compound-multi	Zero Shot	AlphaMissense
468	SPG1_STRSG_Olson_2014	320	5	spearman_r	0.344882	Local-single	Zero Shot	AlphaMissense
469	HIS7_YEAST_Pokusaeva_2019	40	1	spearman_r	0.6155	Compound-multi	Zero Shot	AlphaMissense
470	GRB2_HUMAN_Faure_2021	320	5	spearman_r	0.504633	Local-single	Zero Shot	AlphaMissense
471	PABP_YEAST_Melamed_2013	160	4	spearman_r	0.819499	Compound-multi	Zero Shot	AlphaMissense
472	PABP_YEAST_Melamed_2013	80	4	spearman_r	0.700808	Local-single	Zero Shot	AlphaMissense
473	GRB2_HUMAN_Faure_2021	160	2	spearman_r	0.542939	Local-single	Zero Shot	AlphaMissense
474	SPG1_STRSG_Olson_2014	160	2	spearman_r	0.480794	Compound-multi	Zero Shot	AlphaMissense
475	SPG1_STRSG_Olson_2014	320	4	spearman_r	0.577345	Compound-multi	Zero Shot	AlphaMissense
476	GRB2_HUMAN_Faure_2021	160	3	spearman_r	0.499971	Local-single	Zero Shot	AlphaMissense
477	CAPSD_AAV2S_Sinai_substitutions_2021	160	3	spearman_r	0.525622	Compound-multi	Zero Shot	AlphaMissense
478	HIS7_YEAST_Pokusaeva_2019	20	4	spearman_r	0.207228	Local-single	Zero Shot	AlphaMissense
479	GRB2_HUMAN_Faure_2021	20	1	spearman_r	0.910712	Local-single	Zero Shot	AlphaMissense
480	A4_HUMAN_Seuma_2021	80	1	spearman_r	0.267555	Compound-multi	Zero Shot	AlphaMissense
481	PABP_YEAST_Melamed_2013	40	1	spearman_r	0.842507	Local-single	Zero Shot	AlphaMissense
482	SPG1_STRSG_Olson_2014	320	2	spearman_r	0.401627	Local-single	Zero Shot	AlphaMissense
483	PABP_YEAST_Melamed_2013	320	3	spearman_r	0.7544	Local-single	Zero Shot	AlphaMissense
484	GRB2_HUMAN_Faure_2021	80	5	spearman_r	0.727791	Local-single	Zero Shot	AlphaMissense
485	YAP1_HUMAN_Araya_2012	160	1	spearman_r	0.39776	Compound-multi	Zero Shot	AlphaMissense
486	A4_HUMAN_Seuma_2021	80	1	spearman_r	0.513383	Local-single	Zero Shot	AlphaMissense
487	CAPSD_AAV2S_Sinai_substitutions_2021	160	3	spearman_r	0.616039	Local-single	Zero Shot	AlphaMissense
488	A4_HUMAN_Seuma_2021	40	1	spearman_r	0.568831	Local-single	Zero Shot	AlphaMissense
489	YAP1_HUMAN_Araya_2012	160	5	spearman_r	0.50833	Local-single	Zero Shot	AlphaMissense
490	PABP_YEAST_Melamed_2013	320	3	spearman_r	0.700838	Compound-multi	Zero Shot	AlphaMissense
491	GRB2_HUMAN_Faure_2021	320	3	spearman_r	0.326883	Compound-multi	Zero Shot	AlphaMissense
492	HIS7_YEAST_Pokusaeva_2019	20	4	spearman_r	0.182123	Compound-multi	Zero Shot	AlphaMissense
493	A4_HUMAN_Seuma_2021	160	1	spearman_r	0.320202	Compound-multi	Zero Shot	AlphaMissense
494	SPG1_STRSG_Olson_2014	20	3	spearman_r	0.297377	Compound-multi	Zero Shot	AlphaMissense
495	YAP1_HUMAN_Araya_2012	160	5	spearman_r	0.397746	Compound-multi	Zero Shot	AlphaMissense
496	GFP_AEQVI_Sarkisyan_2016	160	2	spearman_r	0.597017	Local-single	Zero Shot	AlphaMissense
497	CAPSD_AAV2S_Sinai_substitutions_2021	320	3	spearman_r	0.502876	Compound-multi	Zero Shot	AlphaMissense
498	GRB2_HUMAN_Faure_2021	20	1	spearman_r	0.322078	Compound-multi	Zero Shot	AlphaMissense
499	PABP_YEAST_Melamed_2013	160	3	spearman_r	0.798866	Local-single	Zero Shot	AlphaMissense
500	A4_HUMAN_Seuma_2021	20	5	spearman_r	0.444818	Local-single	Zero Shot	AlphaMissense
501	A4_HUMAN_Seuma_2021	160	1	spearman_r	0.471928	Local-single	Zero Shot	AlphaMissense
502	SPG1_STRSG_Olson_2014	80	5	spearman_r	0.604747	Local-single	Zero Shot	AlphaMissense
503	A4_HUMAN_Seuma_2021	160	5	spearman_r	0.60287	Local-single	Zero Shot	AlphaMissense
504	DLG4_HUMAN_Faure_2021	20	1	spearman_r	0.722969	Local-single	Zero Shot	AlphaMissense
505	GFP_AEQVI_Sarkisyan_2016	160	1	spearman_r	0.594923	Compound-multi	Zero Shot	AlphaMissense
506	CAPSD_AAV2S_Sinai_substitutions_2021	80	3	spearman_r	0.742314	Local-single	Zero Shot	AlphaMissense
507	SPG1_STRSG_Olson_2014	80	5	spearman_r	0.460711	Compound-multi	Zero Shot	AlphaMissense
508	DLG4_HUMAN_Faure_2021	80	1	spearman_r	0.407145	Local-single	Zero Shot	AlphaMissense
509	GRB2_HUMAN_Faure_2021	80	3	spearman_r	0.222997	Local-single	Zero Shot	AlphaMissense
510	PABP_YEAST_Melamed_2013	40	4	spearman_r	0.669286	Local-single	Zero Shot	AlphaMissense
511	CAPSD_AAV2S_Sinai_substitutions_2021	40	3	spearman_r	0.655761	Compound-multi	Zero Shot	AlphaMissense
512	A4_HUMAN_Seuma_2021	20	1	spearman_r	0.450549	Compound-multi	Zero Shot	AlphaMissense
513	GFP_AEQVI_Sarkisyan_2016	320	3	spearman_r	0.613295	Local-single	Zero Shot	AlphaMissense
514	HIS7_YEAST_Pokusaeva_2019	40	4	spearman_r	0.0341085	Local-single	Zero Shot	AlphaMissense
515	GRB2_HUMAN_Faure_2021	40	1	spearman_r	0.27664	Local-single	Zero Shot	AlphaMissense
516	DLG4_HUMAN_Faure_2021	80	1	spearman_r	0.418206	Compound-multi	Zero Shot	AlphaMissense
517	GCN4_YEAST_Staller_induction_2018	20	3	spearman_r	0.349351	Local-single	Zero Shot	AlphaMissense
518	PABP_YEAST_Melamed_2013	40	4	spearman_r	0.55152	Compound-multi	Zero Shot	AlphaMissense
519	CAPSD_AAV2S_Sinai_substitutions_2021	40	3	spearman_r	0.740041	Local-single	Zero Shot	AlphaMissense
520	A4_HUMAN_Seuma_2021	20	1	spearman_r	0.458128	Local-single	Zero Shot	AlphaMissense
521	YAP1_HUMAN_Araya_2012	80	1	spearman_r	0.663448	Local-single	Zero Shot	AlphaMissense
522	GFP_AEQVI_Sarkisyan_2016	80	4	spearman_r	0.528643	Compound-multi	Zero Shot	AlphaMissense
523	DLG4_HUMAN_Faure_2021	40	1	spearman_r	0.548792	Local-single	Zero Shot	AlphaMissense
524	A4_HUMAN_Seuma_2021	80	4	spearman_r	0.04814	Compound-multi	Zero Shot	AlphaMissense
525	GRB2_HUMAN_Faure_2021	160	3	spearman_r	0.467652	Compound-multi	Zero Shot	AlphaMissense
526	PABP_YEAST_Melamed_2013	20	4	spearman_r	0.262463	Local-single	Zero Shot	AlphaMissense
527	CAPSD_AAV2S_Sinai_substitutions_2021	80	3	spearman_r	0.630717	Compound-multi	Zero Shot	AlphaMissense
528	GFP_AEQVI_Sarkisyan_2016	160	2	spearman_r	0.494099	Compound-multi	Zero Shot	AlphaMissense
529	GRB2_HUMAN_Faure_2021	40	1	spearman_r	0.525275	Compound-multi	Zero Shot	AlphaMissense
530	A4_HUMAN_Seuma_2021	40	1	spearman_r	0.301955	Compound-multi	Zero Shot	AlphaMissense
531	DLG4_HUMAN_Faure_2021	40	1	spearman_r	0.460081	Compound-multi	Zero Shot	AlphaMissense
532	HIS7_YEAST_Pokusaeva_2019	40	4	spearman_r	0.184343	Compound-multi	Zero Shot	AlphaMissense
533	SPG1_STRSG_Olson_2014	320	2	spearman_r	0.47304	Compound-multi	Zero Shot	AlphaMissense
534	F7YBW8_MESOW_Aakre_2015	20	3	spearman_r	0.398261	Compound-multi	Zero Shot	AlphaMissense
535	PABP_YEAST_Melamed_2013	20	4	spearman_r	0.672727	Compound-multi	Zero Shot	AlphaMissense
536	A4_HUMAN_Seuma_2021	20	5	spearman_r	0.0157895	Compound-multi	Zero Shot	AlphaMissense
537	SPG1_STRSG_Olson_2014	160	2	spearman_r	0.432351	Local-single	Zero Shot	AlphaMissense
538	GRB2_HUMAN_Faure_2021	80	5	spearman_r	0.305254	Compound-multi	Zero Shot	AlphaMissense
539	CAPSD_AAV2S_Sinai_substitutions_2021	160	2	spearman_r	0.523678	Local-single	Zero Shot	AlphaMissense
540	CAPSD_AAV2S_Sinai_substitutions_2021	160	1	spearman_r	0.587482	Compound-multi	Zero Shot	AlphaMissense
541	SPG1_STRSG_Olson_2014	160	1	spearman_r	0.407252	Compound-multi	Zero Shot	AlphaMissense
542	DLG4_HUMAN_Faure_2021	40	3	spearman_r	0.472017	Local-single	Zero Shot	AlphaMissense
543	GFP_AEQVI_Sarkisyan_2016	40	4	spearman_r	0.374506	Compound-multi	Zero Shot	AlphaMissense
544	GRB2_HUMAN_Faure_2021	40	2	spearman_r	0.589129	Compound-multi	Zero Shot	AlphaMissense
545	DLG4_HUMAN_Faure_2021	40	4	spearman_r	0.6764	Local-single	Zero Shot	AlphaMissense
546	SPG1_STRSG_Olson_2014	40	5	spearman_r	0.0674128	Compound-multi	Zero Shot	AlphaMissense
547	PABP_YEAST_Melamed_2013	160	5	spearman_r	0.832609	Local-single	Zero Shot	AlphaMissense
548	CAPSD_AAV2S_Sinai_substitutions_2021	160	1	spearman_r	0.667668	Local-single	Zero Shot	AlphaMissense
549	DLG4_HUMAN_Faure_2021	40	3	spearman_r	0.247059	Compound-multi	Zero Shot	AlphaMissense
550	GFP_AEQVI_Sarkisyan_2016	40	3	spearman_r	0.593248	Local-single	Zero Shot	AlphaMissense
551	PABP_YEAST_Melamed_2013	20	1	spearman_r	0.769795	Local-single	Zero Shot	AlphaMissense
552	DLG4_HUMAN_Faure_2021	80	4	spearman_r	0.267652	Compound-multi	Zero Shot	AlphaMissense
553	SPG1_STRSG_Olson_2014	20	1	spearman_r	0.02	Compound-multi	Zero Shot	AlphaMissense
554	PABP_YEAST_Melamed_2013	320	5	spearman_r	0.775484	Compound-multi	Zero Shot	AlphaMissense
555	HIS7_YEAST_Pokusaeva_2019	20	1	spearman_r	0.15415	Local-single	Zero Shot	AlphaMissense
556	YAP1_HUMAN_Araya_2012	20	1	spearman_r	0.157625	Local-single	Zero Shot	AlphaMissense
557	DLG4_HUMAN_Faure_2021	20	3	spearman_r	0.38673	Local-single	Zero Shot	AlphaMissense
558	PABP_YEAST_Melamed_2013	160	5	spearman_r	0.762003	Compound-multi	Zero Shot	AlphaMissense
559	CAPSD_AAV2S_Sinai_substitutions_2021	320	1	spearman_r	0.394822	Compound-multi	Zero Shot	AlphaMissense
560	GRB2_HUMAN_Faure_2021	20	2	spearman_r	0.19291	Local-single	Zero Shot	AlphaMissense
561	GFP_AEQVI_Sarkisyan_2016	20	2	spearman_r	0.030303	Compound-multi	Zero Shot	AlphaMissense
562	A4_HUMAN_Seuma_2021	320	4	spearman_r	0.408182	Compound-multi	Zero Shot	AlphaMissense
563	DLG4_HUMAN_Faure_2021	80	4	spearman_r	0.314248	Local-single	Zero Shot	AlphaMissense
564	GRB2_HUMAN_Faure_2021	320	2	spearman_r	0.373693	Compound-multi	Zero Shot	AlphaMissense
565	DLG4_HUMAN_Faure_2021	20	3	spearman_r	0.538462	Compound-multi	Zero Shot	AlphaMissense
566	F7YBW8_MESOW_Aakre_2015	20	5	spearman_r	0.570585	Compound-multi	Zero Shot	AlphaMissense
567	SPG1_STRSG_Olson_2014	320	1	spearman_r	0.467305	Compound-multi	Zero Shot	AlphaMissense
568	CAPSD_AAV2S_Sinai_substitutions_2021	320	1	spearman_r	0.688329	Local-single	Zero Shot	AlphaMissense
569	HIS7_YEAST_Pokusaeva_2019	20	1	spearman_r	0.7	Compound-multi	Zero Shot	AlphaMissense
570	SPG1_STRSG_Olson_2014	160	1	spearman_r	0.423598	Local-single	Zero Shot	AlphaMissense
571	SPG1_STRSG_Olson_2014	20	1	spearman_r	0.268191	Local-single	Zero Shot	AlphaMissense
572	GFP_AEQVI_Sarkisyan_2016	20	4	spearman_r	0.357964	Local-single	Zero Shot	AlphaMissense
573	DLG4_HUMAN_Faure_2021	40	4	spearman_r	0.186275	Compound-multi	Zero Shot	AlphaMissense
574	CAPSD_AAV2S_Sinai_substitutions_2021	40	1	spearman_r	0.69664	Compound-multi	Zero Shot	AlphaMissense
575	GFP_AEQVI_Sarkisyan_2016	80	3	spearman_r	0.639194	Local-single	Zero Shot	AlphaMissense
576	GFP_AEQVI_Sarkisyan_2016	20	2	spearman_r	0.619048	Local-single	Zero Shot	AlphaMissense
577	GRB2_HUMAN_Faure_2021	80	2	spearman_r	0.485707	Compound-multi	Zero Shot	AlphaMissense
578	A4_HUMAN_Seuma_2021	160	4	spearman_r	0.439629	Local-single	Zero Shot	AlphaMissense
579	DLG4_HUMAN_Faure_2021	160	3	spearman_r	0.392711	Local-single	Zero Shot	AlphaMissense
580	GRB2_HUMAN_Faure_2021	80	2	spearman_r	0.553342	Local-single	Zero Shot	AlphaMissense
581	SPG1_STRSG_Olson_2014	80	1	spearman_r	0.45749	Compound-multi	Zero Shot	AlphaMissense
582	SPG1_STRSG_Olson_2014	40	1	spearman_r	0.320355	Local-single	Zero Shot	AlphaMissense
583	CAPSD_AAV2S_Sinai_substitutions_2021	40	1	spearman_r	0.583744	Local-single	Zero Shot	AlphaMissense
584	DLG4_HUMAN_Faure_2021	320	3	spearman_r	0.457472	Local-single	Zero Shot	AlphaMissense
585	CAPSD_AAV2S_Sinai_substitutions_2021	20	1	spearman_r	0.0300908	Local-single	Zero Shot	AlphaMissense
586	YAP1_HUMAN_Araya_2012	20	1	spearman_r	0.410989	Compound-multi	Zero Shot	AlphaMissense
587	DLG4_HUMAN_Faure_2021	160	3	spearman_r	0.535943	Compound-multi	Zero Shot	AlphaMissense
588	PABP_YEAST_Melamed_2013	20	1	spearman_r	0.481319	Compound-multi	Zero Shot	AlphaMissense
589	GRB2_HUMAN_Faure_2021	40	5	spearman_r	0.804382	Local-single	Zero Shot	AlphaMissense
590	CAPSD_AAV2S_Sinai_substitutions_2021	20	1	spearman_r	0.0636364	Compound-multi	Zero Shot	AlphaMissense
591	DLG4_HUMAN_Faure_2021	80	3	spearman_r	0.37949	Compound-multi	Zero Shot	AlphaMissense
592	PABP_YEAST_Melamed_2013	320	5	spearman_r	0.811166	Local-single	Zero Shot	AlphaMissense
593	GRB2_HUMAN_Faure_2021	160	2	spearman_r	0.47924	Compound-multi	Zero Shot	AlphaMissense
594	CAPSD_AAV2S_Sinai_substitutions_2021	80	1	spearman_r	0.604496	Local-single	Zero Shot	AlphaMissense
595	DLG4_HUMAN_Faure_2021	20	4	spearman_r	0.259358	Local-single	Zero Shot	AlphaMissense
596	GRB2_HUMAN_Faure_2021	40	2	spearman_r	0.600342	Local-single	Zero Shot	AlphaMissense
597	PABP_YEAST_Melamed_2013	80	5	spearman_r	0.565256	Local-single	Zero Shot	AlphaMissense
598	SPG1_STRSG_Olson_2014	40	1	spearman_r	0.0447571	Compound-multi	Zero Shot	AlphaMissense
599	DLG4_HUMAN_Faure_2021	80	3	spearman_r	0.494236	Local-single	Zero Shot	AlphaMissense
600	SPG1_STRSG_Olson_2014	80	1	spearman_r	0.575046	Local-single	Zero Shot	AlphaMissense
601	GFP_AEQVI_Sarkisyan_2016	40	2	spearman_r	0.61913	Compound-multi	Zero Shot	AlphaMissense
602	SPG1_STRSG_Olson_2014	20	5	spearman_r	0.115002	Local-single	Zero Shot	AlphaMissense
603	DLG4_HUMAN_Faure_2021	20	4	spearman_r	0.538462	Compound-multi	Zero Shot	AlphaMissense
604	CAPSD_AAV2S_Sinai_substitutions_2021	80	1	spearman_r	0.473322	Compound-multi	Zero Shot	AlphaMissense
605	F7YBW8_MESOW_Aakre_2015	20	5	spearman_r	0.252964	Local-single	Zero Shot	AlphaMissense
606	GRB2_HUMAN_Faure_2021	160	1	spearman_r	0.275709	Compound-multi	Zero Shot	AlphaMissense
607	HIS7_YEAST_Pokusaeva_2019	80	5	spearman_r	0.131427	Local-single	Zero Shot	AlphaMissense
608	GCN4_YEAST_Staller_induction_2018	20	2	spearman_r	0.349351	Local-single	Zero Shot	AlphaMissense
609	DLG4_HUMAN_Faure_2021	20	5	spearman_r	0.14004	Local-single	Zero Shot	AlphaMissense
610	DLG4_HUMAN_Faure_2021	80	2	spearman_r	0.0740891	Compound-multi	Zero Shot	AlphaMissense
611	HIS7_YEAST_Pokusaeva_2019	40	5	spearman_r	0.236469	Compound-multi	Zero Shot	AlphaMissense
612	GFP_AEQVI_Sarkisyan_2016	80	2	spearman_r	0.282927	Compound-multi	Zero Shot	AlphaMissense
613	GRB2_HUMAN_Faure_2021	20	3	spearman_r	0.364263	Local-single	Zero Shot	AlphaMissense
614	CAPSD_AAV2S_Sinai_substitutions_2021	80	2	spearman_r	0.614741	Compound-multi	Zero Shot	AlphaMissense
615	PABP_YEAST_Melamed_2013	20	5	spearman_r	0.69453	Compound-multi	Zero Shot	AlphaMissense
616	GFP_AEQVI_Sarkisyan_2016	40	4	spearman_r	0.511061	Local-single	Zero Shot	AlphaMissense
617	DLG4_HUMAN_Faure_2021	40	5	spearman_r	0.125874	Compound-multi	Zero Shot	AlphaMissense
618	GFP_AEQVI_Sarkisyan_2016	20	4	spearman_r	0.369697	Compound-multi	Zero Shot	AlphaMissense
619	CAPSD_AAV2S_Sinai_substitutions_2021	80	2	spearman_r	0.647055	Local-single	Zero Shot	AlphaMissense
620	DLG4_HUMAN_Faure_2021	40	2	spearman_r	0.553658	Local-single	Zero Shot	AlphaMissense
621	PABP_YEAST_Melamed_2013	40	1	spearman_r	0.511383	Compound-multi	Zero Shot	AlphaMissense
622	PABP_YEAST_Melamed_2013	320	4	spearman_r	0.797524	Local-single	Zero Shot	AlphaMissense
623	SPG1_STRSG_Olson_2014	20	2	spearman_r	0.227487	Local-single	Zero Shot	AlphaMissense
624	YAP1_HUMAN_Araya_2012	40	1	spearman_r	0.496992	Local-single	Zero Shot	AlphaMissense
625	GRB2_HUMAN_Faure_2021	160	1	spearman_r	0.455332	Local-single	Zero Shot	AlphaMissense
626	A4_HUMAN_Seuma_2021	320	4	spearman_r	0.485622	Local-single	Zero Shot	AlphaMissense
627	YAP1_HUMAN_Araya_2012	80	5	spearman_r	0.53944	Local-single	Zero Shot	AlphaMissense
628	DLG4_HUMAN_Faure_2021	40	2	spearman_r	0.749451	Compound-multi	Zero Shot	AlphaMissense
629	DLG4_HUMAN_Faure_2021	40	5	spearman_r	0.521663	Local-single	Zero Shot	AlphaMissense
630	HIS7_YEAST_Pokusaeva_2019	20	5	spearman_r	0.166234	Local-single	Zero Shot	AlphaMissense
631	CAPSD_AAV2S_Sinai_substitutions_2021	160	2	spearman_r	0.376602	Compound-multi	Zero Shot	AlphaMissense
632	GRB2_HUMAN_Faure_2021	40	3	spearman_r	0.216783	Compound-multi	Zero Shot	AlphaMissense
633	GFP_AEQVI_Sarkisyan_2016	320	1	spearman_r	0.597106	Compound-multi	Zero Shot	AlphaMissense
634	DLG4_HUMAN_Faure_2021	20	2	spearman_r	0.708944	Local-single	Zero Shot	AlphaMissense
635	F7YBW8_MESOW_Aakre_2015	20	4	spearman_r	0.431304	Compound-multi	Zero Shot	AlphaMissense
636	PABP_YEAST_Melamed_2013	320	4	spearman_r	0.764589	Compound-multi	Zero Shot	AlphaMissense
637	SPG1_STRSG_Olson_2014	40	2	spearman_r	0.259611	Local-single	Zero Shot	AlphaMissense
638	DLG4_HUMAN_Faure_2021	80	5	spearman_r	0.299048	Compound-multi	Zero Shot	AlphaMissense
639	SPG1_STRSG_Olson_2014	40	2	spearman_r	0.0845701	Compound-multi	Zero Shot	AlphaMissense
640	SPG1_STRSG_Olson_2014	40	5	spearman_r	0.359152	Local-single	Zero Shot	AlphaMissense
641	GRB2_HUMAN_Faure_2021	320	1	spearman_r	0.407172	Compound-multi	Zero Shot	AlphaMissense
642	PABP_YEAST_Melamed_2013	20	5	spearman_r	0.589809	Local-single	Zero Shot	AlphaMissense
643	DLG4_HUMAN_Faure_2021	320	2	spearman_r	0.4007	Local-single	Zero Shot	AlphaMissense
644	A4_HUMAN_Seuma_2021	160	4	spearman_r	0.351516	Compound-multi	Zero Shot	AlphaMissense
645	GFP_AEQVI_Sarkisyan_2016	40	2	spearman_r	0.553066	Local-single	Zero Shot	AlphaMissense
646	CAPSD_AAV2S_Sinai_substitutions_2021	20	2	spearman_r	0.551515	Compound-multi	Zero Shot	AlphaMissense
647	GRB2_HUMAN_Faure_2021	20	2	spearman_r	0.483516	Compound-multi	Zero Shot	AlphaMissense
648	PABP_YEAST_Melamed_2013	80	5	spearman_r	0.473216	Compound-multi	Zero Shot	AlphaMissense
649	DLG4_HUMAN_Faure_2021	160	4	spearman_r	0.546271	Local-single	Zero Shot	AlphaMissense
650	DLG4_HUMAN_Faure_2021	320	2	spearman_r	0.505727	Compound-multi	Zero Shot	AlphaMissense
651	SPG1_STRSG_Olson_2014	320	1	spearman_r	0.496165	Local-single	Zero Shot	AlphaMissense
652	GRB2_HUMAN_Faure_2021	320	2	spearman_r	0.471332	Local-single	Zero Shot	AlphaMissense
653	CAPSD_AAV2S_Sinai_substitutions_2021	20	2	spearman_r	0.479593	Local-single	Zero Shot	AlphaMissense
654	HIS7_YEAST_Pokusaeva_2019	80	5	spearman_r	0.649197	Compound-multi	Zero Shot	AlphaMissense
655	YAP1_HUMAN_Araya_2012	40	1	spearman_r	0.555679	Compound-multi	Zero Shot	AlphaMissense
656	SPG1_STRSG_Olson_2014	20	5	spearman_r	0.283243	Compound-multi	Zero Shot	AlphaMissense
657	DLG4_HUMAN_Faure_2021	160	2	spearman_r	0.660183	Local-single	Zero Shot	AlphaMissense
658	DLG4_HUMAN_Faure_2021	320	4	spearman_r	0.595908	Compound-multi	Zero Shot	AlphaMissense
659	PABP_YEAST_Melamed_2013	40	5	spearman_r	0.73376	Local-single	Zero Shot	AlphaMissense
660	DLG4_HUMAN_Faure_2021	20	5	spearman_r	0.653846	Compound-multi	Zero Shot	AlphaMissense
661	DLG4_HUMAN_Faure_2021	80	2	spearman_r	0.249285	Local-single	Zero Shot	AlphaMissense
662	CAPSD_AAV2S_Sinai_substitutions_2021	40	2	spearman_r	0.0705859	Local-single	Zero Shot	AlphaMissense
663	GFP_AEQVI_Sarkisyan_2016	320	1	spearman_r	0.595082	Local-single	Zero Shot	AlphaMissense
664	HIS7_YEAST_Pokusaeva_2019	40	5	spearman_r	0.0674121	Local-single	Zero Shot	AlphaMissense
665	A4_HUMAN_Seuma_2021	320	5	spearman_r	0.558147	Local-single	Zero Shot	AlphaMissense
666	DLG4_HUMAN_Faure_2021	160	4	spearman_r	0.104305	Compound-multi	Zero Shot	AlphaMissense
667	F7YBW8_MESOW_Aakre_2015	20	4	spearman_r	0.393846	Local-single	Zero Shot	AlphaMissense
668	GRB2_HUMAN_Faure_2021	20	3	spearman_r	0.396923	Compound-multi	Zero Shot	AlphaMissense
669	DLG4_HUMAN_Faure_2021	160	2	spearman_r	0.644853	Compound-multi	Zero Shot	AlphaMissense
670	SPG1_STRSG_Olson_2014	20	2	spearman_r	0.347962	Compound-multi	Zero Shot	AlphaMissense
671	DLG4_HUMAN_Faure_2021	320	4	spearman_r	0.472414	Local-single	Zero Shot	AlphaMissense
672	CAPSD_AAV2S_Sinai_substitutions_2021	40	2	spearman_r	0.382684	Compound-multi	Zero Shot	AlphaMissense
673	GRB2_HUMAN_Faure_2021	320	1	spearman_r	0.457126	Local-single	Zero Shot	AlphaMissense
674	PABP_YEAST_Melamed_2013	40	5	spearman_r	0.529028	Compound-multi	Zero Shot	AlphaMissense
675	F7YBW8_MESOW_Aakre_2015	20	2	spearman_r	0.393846	Local-single	Zero Shot	AlphaMissense
676	DLG4_HUMAN_Faure_2021	20	1	spearman_r	0.0274725	Compound-multi	Zero Shot	AlphaMissense
677	DLG4_HUMAN_Faure_2021	320	3	spearman_r	0.374739	Compound-multi	Zero Shot	AlphaMissense
678	F7YBW8_MESOW_Aakre_2015	20	1	spearman_r	0.312821	Local-single	Zero Shot	AlphaMissense
679	YAP1_HUMAN_Araya_2012	40	2	spearman_r	0.625816	Local-single	Zero Shot	AlphaMissense
680	SPG1_STRSG_Olson_2014	160	3	spearman_r	0.645883	Compound-multi	Zero Shot	AlphaMissense
681	HIS7_YEAST_Pokusaeva_2019	20	3	spearman_r	0.620393	Compound-multi	Zero Shot	AlphaMissense
682	YAP1_HUMAN_Araya_2012	40	4	spearman_r	0.468331	Local-single	Zero Shot	AlphaMissense
683	GFP_AEQVI_Sarkisyan_2016	20	5	spearman_r	0.187879	Compound-multi	Zero Shot	AlphaMissense
684	PABP_YEAST_Melamed_2013	320	2	spearman_r	0.744928	Compound-multi	Zero Shot	AlphaMissense
685	GFP_AEQVI_Sarkisyan_2016	80	3	spearman_r	0.608947	Compound-multi	Zero Shot	AlphaMissense
686	CAPSD_AAV2S_Sinai_substitutions_2021	160	5	spearman_r	0.5831	Compound-multi	Zero Shot	AlphaMissense
687	HIS7_YEAST_Pokusaeva_2019	20	2	spearman_r	0.0746154	Local-single	Zero Shot	AlphaMissense
688	CAPSD_AAV2S_Sinai_substitutions_2021	320	4	spearman_r	0.372134	Compound-multi	Zero Shot	AlphaMissense
689	YAP1_HUMAN_Araya_2012	20	3	spearman_r	0.218548	Local-single	Zero Shot	AlphaMissense
690	A4_HUMAN_Seuma_2021	160	2	spearman_r	0.508025	Local-single	Zero Shot	AlphaMissense
691	GCN4_YEAST_Staller_induction_2018	20	5	spearman_r	0.349351	Local-single	Zero Shot	AlphaMissense
692	GRB2_HUMAN_Faure_2021	160	5	spearman_r	0.570419	Local-single	Zero Shot	AlphaMissense
693	YAP1_HUMAN_Araya_2012	20	2	spearman_r	0.546798	Local-single	Zero Shot	AlphaMissense
694	YAP1_HUMAN_Araya_2012	40	4	spearman_r	0.308023	Compound-multi	Zero Shot	AlphaMissense
695	GFP_AEQVI_Sarkisyan_2016	320	2	spearman_r	0.552341	Local-single	Zero Shot	AlphaMissense
696	A4_HUMAN_Seuma_2021	80	3	spearman_r	0.616816	Local-single	Zero Shot	AlphaMissense
697	PABP_YEAST_Melamed_2013	160	2	spearman_r	0.621998	Local-single	Zero Shot	AlphaMissense
698	GFP_AEQVI_Sarkisyan_2016	80	5	spearman_r	0.397022	Compound-multi	Zero Shot	AlphaMissense
699	YAP1_HUMAN_Araya_2012	40	3	spearman_r	0.370061	Compound-multi	Zero Shot	AlphaMissense
700	SPG1_STRSG_Olson_2014	160	3	spearman_r	0.695024	Local-single	Zero Shot	AlphaMissense
701	A4_HUMAN_Seuma_2021	320	2	spearman_r	0.46749	Compound-multi	Zero Shot	AlphaMissense
702	A4_HUMAN_Seuma_2021	40	4	spearman_r	0.149052	Compound-multi	Zero Shot	AlphaMissense
703	SPG1_STRSG_Olson_2014	20	4	spearman_r	0.632244	Local-single	Zero Shot	AlphaMissense
704	GRB2_HUMAN_Faure_2021	40	4	spearman_r	0.600143	Local-single	Zero Shot	AlphaMissense
705	CAPSD_AAV2S_Sinai_substitutions_2021	160	4	spearman_r	0.554327	Local-single	Zero Shot	AlphaMissense
706	YAP1_HUMAN_Araya_2012	20	3	spearman_r	0.187879	Compound-multi	Zero Shot	AlphaMissense
707	GFP_AEQVI_Sarkisyan_2016	80	1	spearman_r	0.444179	Compound-multi	Zero Shot	AlphaMissense
708	A4_HUMAN_Seuma_2021	80	2	spearman_r	0.379593	Compound-multi	Zero Shot	AlphaMissense
709	A4_HUMAN_Seuma_2021	40	5	spearman_r	0.2253	Compound-multi	Zero Shot	AlphaMissense
710	GRB2_HUMAN_Faure_2021	40	4	spearman_r	0.368749	Compound-multi	Zero Shot	AlphaMissense
711	GFP_AEQVI_Sarkisyan_2016	40	3	spearman_r	0.272727	Compound-multi	Zero Shot	AlphaMissense
712	SPG1_STRSG_Olson_2014	80	3	spearman_r	0.220826	Local-single	Zero Shot	AlphaMissense
713	CAPSD_AAV2S_Sinai_substitutions_2021	160	5	spearman_r	0.644185	Local-single	Zero Shot	AlphaMissense
714	YAP1_HUMAN_Araya_2012	80	4	spearman_r	0.489728	Local-single	Zero Shot	AlphaMissense
715	PABP_YEAST_Melamed_2013	20	3	spearman_r	0.507692	Compound-multi	Zero Shot	AlphaMissense
716	HIS7_YEAST_Pokusaeva_2019	80	1	spearman_r	0.368478	Compound-multi	Zero Shot	AlphaMissense
717	GFP_AEQVI_Sarkisyan_2016	80	5	spearman_r	0.604739	Local-single	Zero Shot	AlphaMissense
718	HIS7_YEAST_Pokusaeva_2019	20	3	spearman_r	0.279503	Local-single	Zero Shot	AlphaMissense
719	CAPSD_AAV2S_Sinai_substitutions_2021	160	4	spearman_r	0.38965	Compound-multi	Zero Shot	AlphaMissense
720	A4_HUMAN_Seuma_2021	80	2	spearman_r	0.456995	Local-single	Zero Shot	AlphaMissense
721	GRB2_HUMAN_Faure_2021	320	4	spearman_r	0.47072	Compound-multi	Zero Shot	AlphaMissense
722	SPG1_STRSG_Olson_2014	40	4	spearman_r	0.292663	Compound-multi	Zero Shot	AlphaMissense
723	A4_HUMAN_Seuma_2021	160	5	spearman_r	0.477194	Compound-multi	Zero Shot	AlphaMissense
724	SPG1_STRSG_Olson_2014	160	5	spearman_r	0.403227	Compound-multi	Zero Shot	AlphaMissense
725	PABP_YEAST_Melamed_2013	20	2	spearman_r	0.358824	Compound-multi	Zero Shot	AlphaMissense
726	A4_HUMAN_Seuma_2021	160	3	spearman_r	0.604899	Compound-multi	Zero Shot	AlphaMissense
727	YAP1_HUMAN_Araya_2012	80	4	spearman_r	0.254219	Compound-multi	Zero Shot	AlphaMissense
728	PABP_YEAST_Melamed_2013	320	2	spearman_r	0.756887	Local-single	Zero Shot	AlphaMissense
729	A4_HUMAN_Seuma_2021	160	2	spearman_r	0.492311	Compound-multi	Zero Shot	AlphaMissense
730	PABP_YEAST_Melamed_2013	40	2	spearman_r	0.660286	Local-single	Zero Shot	AlphaMissense
731	GFP_AEQVI_Sarkisyan_2016	160	5	spearman_r	0.542155	Compound-multi	Zero Shot	AlphaMissense
732	GFP_AEQVI_Sarkisyan_2016	160	4	spearman_r	0.583514	Compound-multi	Zero Shot	AlphaMissense
733	HIS7_YEAST_Pokusaeva_2019	80	2	spearman_r	0.0891349	Local-single	Zero Shot	AlphaMissense
734	GFP_AEQVI_Sarkisyan_2016	20	5	spearman_r	0.608059	Local-single	Zero Shot	AlphaMissense
735	F7YBW8_MESOW_Aakre_2015	20	1	spearman_r	0.574301	Compound-multi	Zero Shot	AlphaMissense
736	CAPSD_AAV2S_Sinai_substitutions_2021	80	5	spearman_r	0.636149	Compound-multi	Zero Shot	AlphaMissense
737	SPG1_STRSG_Olson_2014	320	5	spearman_r	0.414089	Compound-multi	Zero Shot	AlphaMissense
738	SPG1_STRSG_Olson_2014	160	5	spearman_r	0.32772	Local-single	Zero Shot	AlphaMissense
739	A4_HUMAN_Seuma_2021	20	3	spearman_r	0.269565	Local-single	Zero Shot	AlphaMissense
740	A4_HUMAN_Seuma_2021	40	3	spearman_r	0.616035	Local-single	Zero Shot	AlphaMissense
741	PABP_YEAST_Melamed_2013	80	2	spearman_r	0.68943	Compound-multi	Zero Shot	AlphaMissense
742	YAP1_HUMAN_Araya_2012	160	3	spearman_r	0.30978	Compound-multi	Zero Shot	AlphaMissense
743	YAP1_HUMAN_Araya_2012	80	3	spearman_r	0.39616	Compound-multi	Zero Shot	AlphaMissense
744	SPG1_STRSG_Olson_2014	20	4	spearman_r	0.783805	Compound-multi	Zero Shot	AlphaMissense
745	PABP_YEAST_Melamed_2013	40	2	spearman_r	0.829086	Compound-multi	Zero Shot	AlphaMissense
746	SPG1_STRSG_Olson_2014	320	3	spearman_r	0.339906	Local-single	Zero Shot	AlphaMissense
747	GFP_AEQVI_Sarkisyan_2016	20	3	spearman_r	0.227273	Compound-multi	Zero Shot	AlphaMissense
748	YAP1_HUMAN_Araya_2012	40	2	spearman_r	0.368019	Compound-multi	Zero Shot	AlphaMissense
749	GFP_AEQVI_Sarkisyan_2016	40	5	spearman_r	0.3	Compound-multi	Zero Shot	AlphaMissense
750	A4_HUMAN_Seuma_2021	40	5	spearman_r	0.404978	Local-single	Zero Shot	AlphaMissense
751	GFP_AEQVI_Sarkisyan_2016	40	1	spearman_r	0.25	Compound-multi	Zero Shot	AlphaMissense
752	GCN4_YEAST_Staller_induction_2018	20	1	spearman_r	0.349351	Local-single	Zero Shot	AlphaMissense
753	A4_HUMAN_Seuma_2021	80	5	spearman_r	0.57601	Local-single	Zero Shot	AlphaMissense
754	HIS7_YEAST_Pokusaeva_2019	40	2	spearman_r	0.0862579	Local-single	Zero Shot	AlphaMissense
755	CAPSD_AAV2S_Sinai_substitutions_2021	40	5	spearman_r	0.61892	Local-single	Zero Shot	AlphaMissense
756	YAP1_HUMAN_Araya_2012	80	3	spearman_r	0.493152	Local-single	Zero Shot	AlphaMissense
757	A4_HUMAN_Seuma_2021	40	3	spearman_r	0.56934	Compound-multi	Zero Shot	AlphaMissense
758	CAPSD_AAV2S_Sinai_substitutions_2021	40	5	spearman_r	0.505068	Compound-multi	Zero Shot	AlphaMissense
759	CAPSD_AAV2S_Sinai_substitutions_2021	320	4	spearman_r	0.720856	Local-single	Zero Shot	AlphaMissense
760	GRB2_HUMAN_Faure_2021	160	5	spearman_r	0.4114	Compound-multi	Zero Shot	AlphaMissense
761	CAPSD_AAV2S_Sinai_substitutions_2021	20	5	spearman_r	0.785316	Local-single	Zero Shot	AlphaMissense
762	SPG1_STRSG_Olson_2014	160	4	spearman_r	0.557868	Compound-multi	Zero Shot	AlphaMissense
763	YAP1_HUMAN_Araya_2012	20	4	spearman_r	0.627907	Local-single	Zero Shot	AlphaMissense
764	PABP_YEAST_Melamed_2013	20	2	spearman_r	0.389663	Local-single	Zero Shot	AlphaMissense
765	CAPSD_AAV2S_Sinai_substitutions_2021	80	5	spearman_r	0.617975	Local-single	Zero Shot	AlphaMissense
766	GRB2_HUMAN_Faure_2021	80	4	spearman_r	0.272365	Compound-multi	Zero Shot	AlphaMissense
767	GFP_AEQVI_Sarkisyan_2016	40	1	spearman_r	0.527875	Local-single	Zero Shot	AlphaMissense
768	A4_HUMAN_Seuma_2021	20	4	spearman_r	0.590656	Local-single	Zero Shot	AlphaMissense
769	GFP_AEQVI_Sarkisyan_2016	160	3	spearman_r	0.635707	Local-single	Zero Shot	AlphaMissense
770	GRB2_HUMAN_Faure_2021	160	4	spearman_r	0.668507	Local-single	Zero Shot	AlphaMissense
771	CAPSD_AAV2S_Sinai_substitutions_2021	320	3	spearman_r	0.729785	Local-single	Zero Shot	AlphaMissense
772	CAPSD_AAV2S_Sinai_substitutions_2021	20	5	spearman_r	0.618182	Compound-multi	Zero Shot	AlphaMissense
773	PABP_YEAST_Melamed_2013	80	2	spearman_r	0.828534	Local-single	Zero Shot	AlphaMissense
774	A4_HUMAN_Seuma_2021	320	2	spearman_r	0.501325	Local-single	Zero Shot	AlphaMissense
775	PABP_YEAST_Melamed_2013	160	2	spearman_r	0.53351	Compound-multi	Zero Shot	AlphaMissense
776	SPG1_STRSG_Olson_2014	320	3	spearman_r	0.334553	Compound-multi	Zero Shot	AlphaMissense
777	PABP_YEAST_Melamed_2013	80	1	spearman_r	0.853426	Local-single	Zero Shot	AlphaMissense
778	GFP_AEQVI_Sarkisyan_2016	40	5	spearman_r	0.54733	Local-single	Zero Shot	AlphaMissense
779	A4_HUMAN_Seuma_2021	80	3	spearman_r	0.604935	Compound-multi	Zero Shot	AlphaMissense
780	YAP1_HUMAN_Araya_2012	40	3	spearman_r	0.438462	Local-single	Zero Shot	AlphaMissense
781	HIS7_YEAST_Pokusaeva_2019	40	2	spearman_r	0.433979	Compound-multi	Zero Shot	AlphaMissense
782	A4_HUMAN_Seuma_2021	20	3	spearman_r	0.260606	Compound-multi	Zero Shot	AlphaMissense
783	HIS7_YEAST_Pokusaeva_2019	80	2	spearman_r	0.553092	Compound-multi	Zero Shot	AlphaMissense
784	YAP1_HUMAN_Araya_2012	160	3	spearman_r	0.388331	Local-single	Zero Shot	AlphaMissense
785	GRB2_HUMAN_Faure_2021	80	4	spearman_r	0.361855	Local-single	Zero Shot	AlphaMissense
786	YAP1_HUMAN_Araya_2012	20	4	spearman_r	0.151648	Compound-multi	Zero Shot	AlphaMissense
787	GFP_AEQVI_Sarkisyan_2016	20	3	spearman_r	0.293377	Local-single	Zero Shot	AlphaMissense
788	SPG1_STRSG_Olson_2014	80	4	spearman_r	0.560081	Local-single	Zero Shot	AlphaMissense
789	CAPSD_AAV2S_Sinai_substitutions_2021	80	4	spearman_r	0.595913	Local-single	Zero Shot	AlphaMissense
790	CAPSD_AAV2S_Sinai_substitutions_2021	20	4	spearman_r	0.703687	Local-single	Zero Shot	AlphaMissense
791	YAP1_HUMAN_Araya_2012	160	1	spearman_r	0.588384	Local-single	Zero Shot	AlphaMissense
792	HIS7_YEAST_Pokusaeva_2019	80	1	spearman_r	0.0613162	Local-single	Zero Shot	AlphaMissense
793	A4_HUMAN_Seuma_2021	320	3	spearman_r	0.545234	Local-single	Zero Shot	AlphaMissense
794	GRB2_HUMAN_Faure_2021	20	4	spearman_r	0.50303	Compound-multi	Zero Shot	AlphaMissense
795	CAPSD_AAV2S_Sinai_substitutions_2021	320	5	spearman_r	0.683925	Local-single	Zero Shot	AlphaMissense
796	YAP1_HUMAN_Araya_2012	40	5	spearman_r	0.45619	Compound-multi	Zero Shot	AlphaMissense
797	A4_HUMAN_Seuma_2021	20	2	spearman_r	0.357143	Compound-multi	Zero Shot	AlphaMissense
798	GFP_AEQVI_Sarkisyan_2016	320	5	spearman_r	0.627772	Compound-multi	Zero Shot	AlphaMissense
799	PABP_YEAST_Melamed_2013	80	3	spearman_r	0.689559	Compound-multi	Zero Shot	AlphaMissense
800	SPG1_STRSG_Olson_2014	40	3	spearman_r	0.0215001	Compound-multi	Zero Shot	AlphaMissense
801	PABP_YEAST_Melamed_2013	160	1	spearman_r	0.676368	Compound-multi	Zero Shot	AlphaMissense
802	CAPSD_AAV2S_Sinai_substitutions_2021	40	4	spearman_r	0.617901	Compound-multi	Zero Shot	AlphaMissense
803	YAP1_HUMAN_Araya_2012	20	5	spearman_r	0.42069	Local-single	Zero Shot	AlphaMissense
804	PABP_YEAST_Melamed_2013	40	3	spearman_r	0.734694	Local-single	Zero Shot	AlphaMissense
805	GFP_AEQVI_Sarkisyan_2016	20	1	spearman_r	0.4	Local-single	Zero Shot	AlphaMissense
806	A4_HUMAN_Seuma_2021	20	2	spearman_r	0.586154	Local-single	Zero Shot	AlphaMissense
807	PABP_YEAST_Melamed_2013	320	1	spearman_r	0.776009	Compound-multi	Zero Shot	AlphaMissense
808	SPG1_STRSG_Olson_2014	40	3	spearman_r	0.0182785	Local-single	Zero Shot	AlphaMissense
809	A4_HUMAN_Seuma_2021	320	3	spearman_r	0.462922	Compound-multi	Zero Shot	AlphaMissense
810	HIS7_YEAST_Pokusaeva_2019	40	3	spearman_r	0.131078	Local-single	Zero Shot	AlphaMissense
811	GFP_AEQVI_Sarkisyan_2016	320	2	spearman_r	0.534494	Compound-multi	Zero Shot	AlphaMissense
812	GRB2_HUMAN_Faure_2021	320	4	spearman_r	0.359525	Local-single	Zero Shot	AlphaMissense
813	GFP_AEQVI_Sarkisyan_2016	320	3	spearman_r	0.562472	Compound-multi	Zero Shot	AlphaMissense
814	A4_HUMAN_Seuma_2021	80	5	spearman_r	0.404437	Compound-multi	Zero Shot	AlphaMissense
815	GFP_AEQVI_Sarkisyan_2016	320	4	spearman_r	0.567018	Compound-multi	Zero Shot	AlphaMissense
816	HIS7_YEAST_Pokusaeva_2019	80	3	spearman_r	0.169133	Local-single	Zero Shot	AlphaMissense
817	PABP_YEAST_Melamed_2013	160	3	spearman_r	0.714573	Compound-multi	Zero Shot	AlphaMissense
818	YAP1_HUMAN_Araya_2012	80	2	spearman_r	0.296868	Compound-multi	Zero Shot	AlphaMissense
819	GFP_AEQVI_Sarkisyan_2016	80	4	spearman_r	0.629721	Local-single	Zero Shot	AlphaMissense
820	A4_HUMAN_Seuma_2021	20	4	spearman_r	0.345055	Compound-multi	Zero Shot	AlphaMissense
821	GFP_AEQVI_Sarkisyan_2016	20	1	spearman_r	0.890909	Compound-multi	Zero Shot	AlphaMissense
822	SPG1_STRSG_Olson_2014	20	3	spearman_r	0.444797	Local-single	Zero Shot	AlphaMissense
823	GFP_AEQVI_Sarkisyan_2016	320	5	spearman_r	0.653109	Local-single	Zero Shot	AlphaMissense
824	YAP1_HUMAN_Araya_2012	80	5	spearman_r	0.4007	Compound-multi	Zero Shot	AlphaMissense
825	A4_HUMAN_Seuma_2021	320	1	spearman_r	0.417606	Compound-multi	Zero Shot	AlphaMissense
826	GFP_AEQVI_Sarkisyan_2016	80	1	spearman_r	0.556724	Local-single	Zero Shot	AlphaMissense
827	GRB2_HUMAN_Faure_2021	320	3	spearman_r	0.427234	Local-single	Zero Shot	AlphaMissense
828	SPG1_STRSG_Olson_2014	80	4	spearman_r	0.567206	Compound-multi	Zero Shot	AlphaMissense
829	CAPSD_AAV2S_Sinai_substitutions_2021	20	4	spearman_r	0.129412	Compound-multi	Zero Shot	AlphaMissense
830	PABP_YEAST_Melamed_2013	160	1	spearman_r	0.630562	Local-single	Zero Shot	AlphaMissense
831	PABP_YEAST_Melamed_2013	80	3	spearman_r	0.712801	Local-single	Zero Shot	AlphaMissense
832	YAP1_HUMAN_Araya_2012	80	2	spearman_r	0.543486	Local-single	Zero Shot	AlphaMissense
833	YAP1_HUMAN_Araya_2012	40	5	spearman_r	0.395464	Local-single	Zero Shot	AlphaMissense
834	A4_HUMAN_Seuma_2021	320	1	spearman_r	0.518324	Local-single	Zero Shot	AlphaMissense
835	GRB2_HUMAN_Faure_2021	20	5	spearman_r	0.0181818	Compound-multi	Zero Shot	AlphaMissense
836	GCN4_YEAST_Staller_induction_2018	20	4	spearman_r	0.349351	Local-single	Zero Shot	AlphaMissense
837	HIS7_YEAST_Pokusaeva_2019	80	3	spearman_r	0.671557	Compound-multi	Zero Shot	AlphaMissense
838	A4_HUMAN_Seuma_2021	40	4	spearman_r	0.036637	Local-single	Zero Shot	AlphaMissense
839	SPG1_STRSG_Olson_2014	40	4	spearman_r	0.576271	Local-single	Zero Shot	AlphaMissense
840	SPG1_STRSG_Olson_2014	160	4	spearman_r	0.586864	Local-single	Zero Shot	AlphaMissense
841	YAP1_HUMAN_Araya_2012	160	2	spearman_r	0.312136	Compound-multi	Zero Shot	AlphaMissense
842	GRB2_HUMAN_Faure_2021	160	4	spearman_r	0.466379	Compound-multi	Zero Shot	AlphaMissense
843	GRB2_HUMAN_Faure_2021	320	5	spearman_r	0.354279	Compound-multi	Zero Shot	AlphaMissense
844	A4_HUMAN_Seuma_2021	40	2	spearman_r	0.370754	Compound-multi	Zero Shot	AlphaMissense
845	GRB2_HUMAN_Faure_2021	20	5	spearman_r	0.870664	Local-single	Zero Shot	AlphaMissense
846	GRB2_HUMAN_Faure_2021	20	4	spearman_r	0.0943978	Local-single	Zero Shot	AlphaMissense
847	PABP_YEAST_Melamed_2013	40	3	spearman_r	0.658103	Compound-multi	Zero Shot	AlphaMissense
848	A4_HUMAN_Seuma_2021	40	2	spearman_r	0.484551	Local-single	Zero Shot	AlphaMissense
849	CAPSD_AAV2S_Sinai_substitutions_2021	80	4	spearman_r	0.570382	Compound-multi	Zero Shot	AlphaMissense
850	YAP1_HUMAN_Araya_2012	160	2	spearman_r	0.427639	Local-single	Zero Shot	AlphaMissense
851	SPG1_STRSG_Olson_2014	80	3	spearman_r	0.144443	Compound-multi	Zero Shot	AlphaMissense
852	CAPSD_AAV2S_Sinai_substitutions_2021	320	5	spearman_r	0.357025	Compound-multi	Zero Shot	AlphaMissense
853	GFP_AEQVI_Sarkisyan_2016	160	3	spearman_r	0.513763	Compound-multi	Zero Shot	AlphaMissense
854	PABP_YEAST_Melamed_2013	80	1	spearman_r	0.78978	Compound-multi	Zero Shot	AlphaMissense
855	CAPSD_AAV2S_Sinai_substitutions_2021	40	4	spearman_r	0.565206	Local-single	Zero Shot	AlphaMissense
856	HIS7_YEAST_Pokusaeva_2019	20	2	spearman_r	0.2	Compound-multi	Zero Shot	AlphaMissense
857	YAP1_HUMAN_Araya_2012	160	4	spearman_r	0.548948	Local-single	Zero Shot	AlphaMissense
858	GFP_AEQVI_Sarkisyan_2016	320	4	spearman_r	0.575868	Local-single	Zero Shot	AlphaMissense
859	GFP_AEQVI_Sarkisyan_2016	160	5	spearman_r	0.689087	Local-single	Zero Shot	AlphaMissense
860	HIS7_YEAST_Pokusaeva_2019	40	3	spearman_r	0.0227619	Compound-multi	Zero Shot	AlphaMissense
861	GFP_AEQVI_Sarkisyan_2016	160	4	spearman_r	0.6154	Local-single	Zero Shot	AlphaMissense
862	PABP_YEAST_Melamed_2013	320	1	spearman_r	0.776273	Local-single	Zero Shot	AlphaMissense
863	YAP1_HUMAN_Araya_2012	20	2	spearman_r	0.241176	Compound-multi	Zero Shot	AlphaMissense
864	A4_HUMAN_Seuma_2021	160	3	spearman_r	0.559786	Local-single	Zero Shot	AlphaMissense
865	PABP_YEAST_Melamed_2013	20	3	spearman_r	0.525735	Local-single	Zero Shot	AlphaMissense
866	F7YBW8_MESOW_Aakre_2015	20	2	spearman_r	0.47091	Compound-multi	Zero Shot	AlphaMissense
867	YAP1_HUMAN_Araya_2012	20	5	spearman_r	0.267532	Compound-multi	Zero Shot	AlphaMissense
868	YAP1_HUMAN_Araya_2012	160	4	spearman_r	0.457274	Compound-multi	Zero Shot	AlphaMissense
869	HIS7_YEAST_Pokusaeva_2019	40	1	spearman_r	0.0558163	Local-single	Zero Shot	AlphaMissense
870	DLG4_HUMAN_Faure_2021	40	4	spearman_r	0.662071	Local-single	Zero Shot	ESM-1v
871	PABP_YEAST_Melamed_2013	40	2	spearman_r	0.538181	Local-single	Zero Shot	ESM-1v
872	GRB2_HUMAN_Faure_2021	20	5	spearman_r	0.163636	Compound-multi	Zero Shot	ESM-1v
873	F7YBW8_MESOW_Aakre_2015	20	5	spearman_r	0.261858	Local-single	Zero Shot	ESM-1v
874	A4_HUMAN_Seuma_2021	40	3	spearman_r	0.680049	Local-single	Zero Shot	ESM-1v
875	HIS7_YEAST_Pokusaeva_2019	80	1	spearman_r	0.122542	Local-single	Zero Shot	ESM-1v
876	HIS7_YEAST_Pokusaeva_2019	80	5	spearman_r	0.145914	Local-single	Zero Shot	ESM-1v
877	DLG4_HUMAN_Faure_2021	320	4	spearman_r	0.593255	Compound-multi	Zero Shot	ESM-1v
878	DLG4_HUMAN_Faure_2021	320	3	spearman_r	0.393162	Local-single	Zero Shot	ESM-1v
879	PABP_YEAST_Melamed_2013	40	2	spearman_r	0.496525	Compound-multi	Zero Shot	ESM-1v
880	GFP_AEQVI_Sarkisyan_2016	20	3	spearman_r	0.0114943	Local-single	Zero Shot	ESM-1v
881	PABP_YEAST_Melamed_2013	80	5	spearman_r	0.575605	Local-single	Zero Shot	ESM-1v
882	GRB2_HUMAN_Faure_2021	320	2	spearman_r	0.510357	Local-single	Zero Shot	ESM-1v
883	PABP_YEAST_Melamed_2013	320	5	spearman_r	0.724316	Local-single	Zero Shot	ESM-1v
884	GFP_AEQVI_Sarkisyan_2016	40	3	spearman_r	0.128094	Local-single	Zero Shot	ESM-1v
885	GRB2_HUMAN_Faure_2021	80	2	spearman_r	0.538324	Local-single	Zero Shot	ESM-1v
886	GFP_AEQVI_Sarkisyan_2016	160	3	spearman_r	0.0530132	Compound-multi	Zero Shot	ESM-1v
887	PABP_YEAST_Melamed_2013	160	1	spearman_r	0.50836	Local-single	Zero Shot	ESM-1v
888	SPG1_STRSG_Olson_2014	40	5	spearman_r	0.00883676	Compound-multi	Zero Shot	ESM-1v
889	DLG4_HUMAN_Faure_2021	160	4	spearman_r	0.562445	Local-single	Zero Shot	ESM-1v
890	GRB2_HUMAN_Faure_2021	160	2	spearman_r	0.546765	Local-single	Zero Shot	ESM-1v
891	A4_HUMAN_Seuma_2021	20	4	spearman_r	0.323077	Compound-multi	Zero Shot	ESM-1v
892	DLG4_HUMAN_Faure_2021	40	4	spearman_r	0.205882	Compound-multi	Zero Shot	ESM-1v
893	SPG1_STRSG_Olson_2014	20	1	spearman_r	0.191596	Local-single	Zero Shot	ESM-1v
894	A4_HUMAN_Seuma_2021	160	4	spearman_r	0.268239	Compound-multi	Zero Shot	ESM-1v
895	GCN4_YEAST_Staller_induction_2018	20	4	spearman_r	0.561039	Local-single	Zero Shot	ESM-1v
896	PABP_YEAST_Melamed_2013	80	5	spearman_r	0.403345	Compound-multi	Zero Shot	ESM-1v
897	PABP_YEAST_Melamed_2013	320	5	spearman_r	0.73468	Compound-multi	Zero Shot	ESM-1v
898	PABP_YEAST_Melamed_2013	20	1	spearman_r	0.789956	Local-single	Zero Shot	ESM-1v
899	A4_HUMAN_Seuma_2021	20	4	spearman_r	0.422024	Local-single	Zero Shot	ESM-1v
900	SPG1_STRSG_Olson_2014	40	1	spearman_r	0.065728	Local-single	Zero Shot	ESM-1v
901	DLG4_HUMAN_Faure_2021	20	4	spearman_r	0.713287	Compound-multi	Zero Shot	ESM-1v
902	PABP_YEAST_Melamed_2013	320	1	spearman_r	0.737626	Compound-multi	Zero Shot	ESM-1v
903	HIS7_YEAST_Pokusaeva_2019	20	1	spearman_r	0.0818746	Local-single	Zero Shot	ESM-1v
904	PABP_YEAST_Melamed_2013	160	1	spearman_r	0.543481	Compound-multi	Zero Shot	ESM-1v
905	PABP_YEAST_Melamed_2013	160	5	spearman_r	0.708965	Compound-multi	Zero Shot	ESM-1v
906	GRB2_HUMAN_Faure_2021	320	4	spearman_r	0.533056	Compound-multi	Zero Shot	ESM-1v
907	A4_HUMAN_Seuma_2021	80	3	spearman_r	0.592165	Local-single	Zero Shot	ESM-1v
908	CAPSD_AAV2S_Sinai_substitutions_2021	20	1	spearman_r	0.172727	Compound-multi	Zero Shot	ESM-1v
909	GRB2_HUMAN_Faure_2021	320	4	spearman_r	0.44809	Local-single	Zero Shot	ESM-1v
910	GFP_AEQVI_Sarkisyan_2016	20	4	spearman_r	0.138478	Local-single	Zero Shot	ESM-1v
911	GCN4_YEAST_Staller_induction_2018	20	5	spearman_r	0.561039	Local-single	Zero Shot	ESM-1v
912	A4_HUMAN_Seuma_2021	320	3	spearman_r	0.424866	Compound-multi	Zero Shot	ESM-1v
913	GRB2_HUMAN_Faure_2021	320	2	spearman_r	0.36543	Compound-multi	Zero Shot	ESM-1v
914	SPG1_STRSG_Olson_2014	20	1	spearman_r	0.0955656	Compound-multi	Zero Shot	ESM-1v
915	GRB2_HUMAN_Faure_2021	160	2	spearman_r	0.425594	Compound-multi	Zero Shot	ESM-1v
916	PABP_YEAST_Melamed_2013	20	2	spearman_r	0.341642	Local-single	Zero Shot	ESM-1v
917	HIS7_YEAST_Pokusaeva_2019	20	2	spearman_r	0.375439	Compound-multi	Zero Shot	ESM-1v
918	A4_HUMAN_Seuma_2021	160	3	spearman_r	0.496451	Local-single	Zero Shot	ESM-1v
919	SPG1_STRSG_Olson_2014	320	5	spearman_r	0.209318	Compound-multi	Zero Shot	ESM-1v
920	DLG4_HUMAN_Faure_2021	80	4	spearman_r	0.247003	Local-single	Zero Shot	ESM-1v
921	A4_HUMAN_Seuma_2021	320	3	spearman_r	0.48114	Local-single	Zero Shot	ESM-1v
922	PABP_YEAST_Melamed_2013	20	2	spearman_r	0.182353	Compound-multi	Zero Shot	ESM-1v
923	DLG4_HUMAN_Faure_2021	160	4	spearman_r	0.0303479	Compound-multi	Zero Shot	ESM-1v
924	PABP_YEAST_Melamed_2013	160	5	spearman_r	0.783781	Local-single	Zero Shot	ESM-1v
925	HIS7_YEAST_Pokusaeva_2019	40	2	spearman_r	0.273676	Compound-multi	Zero Shot	ESM-1v
926	GRB2_HUMAN_Faure_2021	160	4	spearman_r	0.702066	Local-single	Zero Shot	ESM-1v
927	PABP_YEAST_Melamed_2013	320	1	spearman_r	0.658024	Local-single	Zero Shot	ESM-1v
928	GFP_AEQVI_Sarkisyan_2016	40	2	spearman_r	0.302467	Local-single	Zero Shot	ESM-1v
929	CAPSD_AAV2S_Sinai_substitutions_2021	20	1	spearman_r	0.224642	Local-single	Zero Shot	ESM-1v
930	HIS7_YEAST_Pokusaeva_2019	80	1	spearman_r	0.393481	Compound-multi	Zero Shot	ESM-1v
931	A4_HUMAN_Seuma_2021	160	3	spearman_r	0.506867	Compound-multi	Zero Shot	ESM-1v
932	HIS7_YEAST_Pokusaeva_2019	20	2	spearman_r	0.0138462	Local-single	Zero Shot	ESM-1v
933	F7YBW8_MESOW_Aakre_2015	20	5	spearman_r	0.491209	Compound-multi	Zero Shot	ESM-1v
934	DLG4_HUMAN_Faure_2021	80	4	spearman_r	0.335523	Compound-multi	Zero Shot	ESM-1v
935	GFP_AEQVI_Sarkisyan_2016	40	2	spearman_r	0.346957	Compound-multi	Zero Shot	ESM-1v
936	GRB2_HUMAN_Faure_2021	40	5	spearman_r	0.736648	Local-single	Zero Shot	ESM-1v
937	DLG4_HUMAN_Faure_2021	20	4	spearman_r	0.410762	Local-single	Zero Shot	ESM-1v
938	A4_HUMAN_Seuma_2021	160	4	spearman_r	0.327916	Local-single	Zero Shot	ESM-1v
939	SPG1_STRSG_Olson_2014	40	1	spearman_r	0.0714041	Compound-multi	Zero Shot	ESM-1v
940	A4_HUMAN_Seuma_2021	80	3	spearman_r	0.57122	Compound-multi	Zero Shot	ESM-1v
941	GRB2_HUMAN_Faure_2021	320	3	spearman_r	0.464013	Local-single	Zero Shot	ESM-1v
942	HIS7_YEAST_Pokusaeva_2019	80	5	spearman_r	0.676513	Compound-multi	Zero Shot	ESM-1v
943	PABP_YEAST_Melamed_2013	20	4	spearman_r	0.016129	Local-single	Zero Shot	ESM-1v
944	PABP_YEAST_Melamed_2013	40	3	spearman_r	0.543747	Local-single	Zero Shot	ESM-1v
945	A4_HUMAN_Seuma_2021	40	1	spearman_r	0.0808906	Compound-multi	Zero Shot	ESM-1v
946	HIS7_YEAST_Pokusaeva_2019	40	3	spearman_r	0.0971006	Local-single	Zero Shot	ESM-1v
947	GRB2_HUMAN_Faure_2021	20	4	spearman_r	0.252941	Local-single	Zero Shot	ESM-1v
948	A4_HUMAN_Seuma_2021	40	2	spearman_r	0.271134	Compound-multi	Zero Shot	ESM-1v
949	GRB2_HUMAN_Faure_2021	160	3	spearman_r	0.58263	Compound-multi	Zero Shot	ESM-1v
950	PABP_YEAST_Melamed_2013	40	4	spearman_r	0.758587	Compound-multi	Zero Shot	ESM-1v
951	PABP_YEAST_Melamed_2013	40	3	spearman_r	0.793478	Compound-multi	Zero Shot	ESM-1v
952	F7YBW8_MESOW_Aakre_2015	20	2	spearman_r	0.423475	Compound-multi	Zero Shot	ESM-1v
953	GFP_AEQVI_Sarkisyan_2016	320	3	spearman_r	0.0476165	Compound-multi	Zero Shot	ESM-1v
954	A4_HUMAN_Seuma_2021	20	1	spearman_r	0.310892	Local-single	Zero Shot	ESM-1v
955	HIS7_YEAST_Pokusaeva_2019	40	4	spearman_r	0.302748	Local-single	Zero Shot	ESM-1v
956	GFP_AEQVI_Sarkisyan_2016	160	2	spearman_r	0.0599782	Compound-multi	Zero Shot	ESM-1v
957	PABP_YEAST_Melamed_2013	40	1	spearman_r	0.860199	Local-single	Zero Shot	ESM-1v
958	A4_HUMAN_Seuma_2021	40	2	spearman_r	0.406969	Local-single	Zero Shot	ESM-1v
959	A4_HUMAN_Seuma_2021	20	1	spearman_r	0.314286	Compound-multi	Zero Shot	ESM-1v
960	SPG1_STRSG_Olson_2014	80	5	spearman_r	0.000571165	Compound-multi	Zero Shot	ESM-1v
961	DLG4_HUMAN_Faure_2021	320	5	spearman_r	0.660511	Compound-multi	Zero Shot	ESM-1v
962	A4_HUMAN_Seuma_2021	80	2	spearman_r	0.313066	Compound-multi	Zero Shot	ESM-1v
963	PABP_YEAST_Melamed_2013	80	4	spearman_r	0.576779	Compound-multi	Zero Shot	ESM-1v
964	HIS7_YEAST_Pokusaeva_2019	80	4	spearman_r	0.406916	Compound-multi	Zero Shot	ESM-1v
965	DLG4_HUMAN_Faure_2021	320	5	spearman_r	0.491726	Local-single	Zero Shot	ESM-1v
966	GFP_AEQVI_Sarkisyan_2016	320	3	spearman_r	0.00930477	Local-single	Zero Shot	ESM-1v
967	GRB2_HUMAN_Faure_2021	80	3	spearman_r	0.356724	Local-single	Zero Shot	ESM-1v
968	GRB2_HUMAN_Faure_2021	40	4	spearman_r	0.428729	Compound-multi	Zero Shot	ESM-1v
969	PABP_YEAST_Melamed_2013	20	3	spearman_r	0.33857	Local-single	Zero Shot	ESM-1v
970	SPG1_STRSG_Olson_2014	160	5	spearman_r	0.102964	Compound-multi	Zero Shot	ESM-1v
971	PABP_YEAST_Melamed_2013	40	4	spearman_r	0.653265	Local-single	Zero Shot	ESM-1v
972	GRB2_HUMAN_Faure_2021	40	5	spearman_r	0.215031	Compound-multi	Zero Shot	ESM-1v
973	HIS7_YEAST_Pokusaeva_2019	40	3	spearman_r	0.0503665	Compound-multi	Zero Shot	ESM-1v
974	F7YBW8_MESOW_Aakre_2015	20	3	spearman_r	0.556154	Local-single	Zero Shot	ESM-1v
975	PABP_YEAST_Melamed_2013	20	3	spearman_r	0.437363	Compound-multi	Zero Shot	ESM-1v
976	HIS7_YEAST_Pokusaeva_2019	40	4	spearman_r	0.243795	Compound-multi	Zero Shot	ESM-1v
977	A4_HUMAN_Seuma_2021	20	2	spearman_r	0.512308	Local-single	Zero Shot	ESM-1v
978	HIS7_YEAST_Pokusaeva_2019	80	3	spearman_r	0.296876	Local-single	Zero Shot	ESM-1v
979	A4_HUMAN_Seuma_2021	320	1	spearman_r	0.366166	Compound-multi	Zero Shot	ESM-1v
980	A4_HUMAN_Seuma_2021	160	1	spearman_r	0.357252	Local-single	Zero Shot	ESM-1v
981	PABP_YEAST_Melamed_2013	80	1	spearman_r	0.616265	Compound-multi	Zero Shot	ESM-1v
982	PABP_YEAST_Melamed_2013	160	3	spearman_r	0.74014	Local-single	Zero Shot	ESM-1v
983	PABP_YEAST_Melamed_2013	160	3	spearman_r	0.630608	Compound-multi	Zero Shot	ESM-1v
984	F7YBW8_MESOW_Aakre_2015	20	2	spearman_r	0.556154	Local-single	Zero Shot	ESM-1v
985	HIS7_YEAST_Pokusaeva_2019	20	4	spearman_r	0.142345	Compound-multi	Zero Shot	ESM-1v
986	HIS7_YEAST_Pokusaeva_2019	40	1	spearman_r	0.204796	Local-single	Zero Shot	ESM-1v
987	A4_HUMAN_Seuma_2021	160	1	spearman_r	0.308736	Compound-multi	Zero Shot	ESM-1v
988	A4_HUMAN_Seuma_2021	320	1	spearman_r	0.426581	Local-single	Zero Shot	ESM-1v
989	PABP_YEAST_Melamed_2013	320	3	spearman_r	0.582071	Compound-multi	Zero Shot	ESM-1v
990	SPG1_STRSG_Olson_2014	80	5	spearman_r	0.0947163	Local-single	Zero Shot	ESM-1v
991	GRB2_HUMAN_Faure_2021	320	3	spearman_r	0.401584	Compound-multi	Zero Shot	ESM-1v
992	PABP_YEAST_Melamed_2013	80	3	spearman_r	0.439023	Local-single	Zero Shot	ESM-1v
993	A4_HUMAN_Seuma_2021	80	1	spearman_r	0.371033	Local-single	Zero Shot	ESM-1v
994	GRB2_HUMAN_Faure_2021	20	4	spearman_r	0.866667	Compound-multi	Zero Shot	ESM-1v
995	A4_HUMAN_Seuma_2021	40	1	spearman_r	0.314141	Local-single	Zero Shot	ESM-1v
996	GFP_AEQVI_Sarkisyan_2016	320	2	spearman_r	0.0789811	Compound-multi	Zero Shot	ESM-1v
997	A4_HUMAN_Seuma_2021	40	4	spearman_r	0.156391	Local-single	Zero Shot	ESM-1v
998	PABP_YEAST_Melamed_2013	20	4	spearman_r	0.772727	Compound-multi	Zero Shot	ESM-1v
999	GRB2_HUMAN_Faure_2021	160	3	spearman_r	0.596453	Local-single	Zero Shot	ESM-1v
1000	F7YBW8_MESOW_Aakre_2015	20	3	spearman_r	0.439633	Compound-multi	Zero Shot	ESM-1v
1001	A4_HUMAN_Seuma_2021	80	4	spearman_r	0.106462	Compound-multi	Zero Shot	ESM-1v
1002	PABP_YEAST_Melamed_2013	80	3	spearman_r	0.47027	Compound-multi	Zero Shot	ESM-1v
1003	A4_HUMAN_Seuma_2021	80	1	spearman_r	0.183759	Compound-multi	Zero Shot	ESM-1v
1004	CAPSD_AAV2S_Sinai_substitutions_2021	40	1	spearman_r	0.0395257	Compound-multi	Zero Shot	ESM-1v
1005	HIS7_YEAST_Pokusaeva_2019	20	4	spearman_r	0.224167	Local-single	Zero Shot	ESM-1v
1006	HIS7_YEAST_Pokusaeva_2019	80	3	spearman_r	0.611085	Compound-multi	Zero Shot	ESM-1v
1007	PABP_YEAST_Melamed_2013	320	3	spearman_r	0.614016	Local-single	Zero Shot	ESM-1v
1008	GFP_AEQVI_Sarkisyan_2016	160	2	spearman_r	0.0424482	Local-single	Zero Shot	ESM-1v
1009	A4_HUMAN_Seuma_2021	20	2	spearman_r	0.414286	Compound-multi	Zero Shot	ESM-1v
1010	HIS7_YEAST_Pokusaeva_2019	40	2	spearman_r	0.0539817	Local-single	Zero Shot	ESM-1v
1011	A4_HUMAN_Seuma_2021	80	2	spearman_r	0.378334	Local-single	Zero Shot	ESM-1v
1012	HIS7_YEAST_Pokusaeva_2019	20	3	spearman_r	0.296443	Local-single	Zero Shot	ESM-1v
1013	PABP_YEAST_Melamed_2013	320	4	spearman_r	0.761935	Local-single	Zero Shot	ESM-1v
1014	PABP_YEAST_Melamed_2013	160	2	spearman_r	0.496913	Compound-multi	Zero Shot	ESM-1v
1015	GRB2_HUMAN_Faure_2021	80	4	spearman_r	0.55265	Local-single	Zero Shot	ESM-1v
1016	GFP_AEQVI_Sarkisyan_2016	160	3	spearman_r	0.0465236	Local-single	Zero Shot	ESM-1v
1017	DLG4_HUMAN_Faure_2021	40	5	spearman_r	0.461538	Compound-multi	Zero Shot	ESM-1v
1018	PABP_YEAST_Melamed_2013	20	5	spearman_r	0.632611	Compound-multi	Zero Shot	ESM-1v
1019	HIS7_YEAST_Pokusaeva_2019	40	5	spearman_r	0.180981	Compound-multi	Zero Shot	ESM-1v
1020	A4_HUMAN_Seuma_2021	20	3	spearman_r	0.030303	Compound-multi	Zero Shot	ESM-1v
1021	GFP_AEQVI_Sarkisyan_2016	20	3	spearman_r	0.281818	Compound-multi	Zero Shot	ESM-1v
1022	HIS7_YEAST_Pokusaeva_2019	80	2	spearman_r	0.490842	Compound-multi	Zero Shot	ESM-1v
1023	DLG4_HUMAN_Faure_2021	20	5	spearman_r	0.187834	Local-single	Zero Shot	ESM-1v
1024	PABP_YEAST_Melamed_2013	80	2	spearman_r	0.746747	Local-single	Zero Shot	ESM-1v
1025	GRB2_HUMAN_Faure_2021	20	3	spearman_r	0.335595	Local-single	Zero Shot	ESM-1v
1026	PABP_YEAST_Melamed_2013	20	5	spearman_r	0.424853	Local-single	Zero Shot	ESM-1v
1027	A4_HUMAN_Seuma_2021	20	3	spearman_r	0.066087	Local-single	Zero Shot	ESM-1v
1028	F7YBW8_MESOW_Aakre_2015	20	4	spearman_r	0.556154	Local-single	Zero Shot	ESM-1v
1029	PABP_YEAST_Melamed_2013	40	1	spearman_r	0.620168	Compound-multi	Zero Shot	ESM-1v
1030	A4_HUMAN_Seuma_2021	40	3	spearman_r	0.506127	Compound-multi	Zero Shot	ESM-1v
1031	PABP_YEAST_Melamed_2013	40	5	spearman_r	0.610617	Local-single	Zero Shot	ESM-1v
1032	GRB2_HUMAN_Faure_2021	20	3	spearman_r	0.489915	Compound-multi	Zero Shot	ESM-1v
1033	GFP_AEQVI_Sarkisyan_2016	80	2	spearman_r	0.211239	Compound-multi	Zero Shot	ESM-1v
1034	DLG4_HUMAN_Faure_2021	320	4	spearman_r	0.463256	Local-single	Zero Shot	ESM-1v
1035	SPG1_STRSG_Olson_2014	40	5	spearman_r	0.150376	Local-single	Zero Shot	ESM-1v
1036	A4_HUMAN_Seuma_2021	320	2	spearman_r	0.434297	Local-single	Zero Shot	ESM-1v
1037	GRB2_HUMAN_Faure_2021	160	4	spearman_r	0.479586	Compound-multi	Zero Shot	ESM-1v
1038	SPG1_STRSG_Olson_2014	160	5	spearman_r	0.101967	Local-single	Zero Shot	ESM-1v
1039	F7YBW8_MESOW_Aakre_2015	20	1	spearman_r	0.594938	Compound-multi	Zero Shot	ESM-1v
1040	PABP_YEAST_Melamed_2013	40	5	spearman_r	0.397597	Compound-multi	Zero Shot	ESM-1v
1041	HIS7_YEAST_Pokusaeva_2019	40	5	spearman_r	0.0707772	Local-single	Zero Shot	ESM-1v
1042	DLG4_HUMAN_Faure_2021	20	5	spearman_r	0.60989	Compound-multi	Zero Shot	ESM-1v
1043	GFP_AEQVI_Sarkisyan_2016	40	3	spearman_r	0.236364	Compound-multi	Zero Shot	ESM-1v
1044	PABP_YEAST_Melamed_2013	80	2	spearman_r	0.655438	Compound-multi	Zero Shot	ESM-1v
1045	PABP_YEAST_Melamed_2013	80	4	spearman_r	0.704072	Local-single	Zero Shot	ESM-1v
1046	HIS7_YEAST_Pokusaeva_2019	80	2	spearman_r	0.193996	Local-single	Zero Shot	ESM-1v
1047	A4_HUMAN_Seuma_2021	40	4	spearman_r	0.280643	Compound-multi	Zero Shot	ESM-1v
1048	GFP_AEQVI_Sarkisyan_2016	320	2	spearman_r	0.0627971	Local-single	Zero Shot	ESM-1v
1049	GRB2_HUMAN_Faure_2021	80	3	spearman_r	0.398058	Compound-multi	Zero Shot	ESM-1v
1050	HIS7_YEAST_Pokusaeva_2019	80	4	spearman_r	0.085125	Local-single	Zero Shot	ESM-1v
1051	GRB2_HUMAN_Faure_2021	40	4	spearman_r	0.598068	Local-single	Zero Shot	ESM-1v
1052	DLG4_HUMAN_Faure_2021	160	5	spearman_r	0.529076	Local-single	Zero Shot	ESM-1v
1053	PABP_YEAST_Melamed_2013	320	2	spearman_r	0.654793	Local-single	Zero Shot	ESM-1v
1054	A4_HUMAN_Seuma_2021	160	2	spearman_r	0.424673	Compound-multi	Zero Shot	ESM-1v
1055	PABP_YEAST_Melamed_2013	160	4	spearman_r	0.714573	Compound-multi	Zero Shot	ESM-1v
1056	GRB2_HUMAN_Faure_2021	20	5	spearman_r	0.84112	Local-single	Zero Shot	ESM-1v
1057	DLG4_HUMAN_Faure_2021	160	5	spearman_r	0.454237	Compound-multi	Zero Shot	ESM-1v
1058	HIS7_YEAST_Pokusaeva_2019	40	1	spearman_r	0.648871	Compound-multi	Zero Shot	ESM-1v
1059	F7YBW8_MESOW_Aakre_2015	20	1	spearman_r	0.509744	Local-single	Zero Shot	ESM-1v
1060	PABP_YEAST_Melamed_2013	160	4	spearman_r	0.692891	Local-single	Zero Shot	ESM-1v
1061	GFP_AEQVI_Sarkisyan_2016	80	2	spearman_r	0.179944	Local-single	Zero Shot	ESM-1v
1062	HIS7_YEAST_Pokusaeva_2019	20	3	spearman_r	0.571764	Compound-multi	Zero Shot	ESM-1v
1063	A4_HUMAN_Seuma_2021	160	2	spearman_r	0.38643	Local-single	Zero Shot	ESM-1v
1064	HIS7_YEAST_Pokusaeva_2019	20	5	spearman_r	0.649088	Compound-multi	Zero Shot	ESM-1v
1065	DLG4_HUMAN_Faure_2021	40	5	spearman_r	0.725121	Local-single	Zero Shot	ESM-1v
1066	PABP_YEAST_Melamed_2013	160	2	spearman_r	0.53405	Local-single	Zero Shot	ESM-1v
1067	GCN4_YEAST_Staller_induction_2018	20	3	spearman_r	0.561039	Local-single	Zero Shot	ESM-1v
1068	HIS7_YEAST_Pokusaeva_2019	20	5	spearman_r	0.344156	Local-single	Zero Shot	ESM-1v
1069	GFP_AEQVI_Sarkisyan_2016	20	4	spearman_r	0.248485	Compound-multi	Zero Shot	ESM-1v
1070	A4_HUMAN_Seuma_2021	320	2	spearman_r	0.418851	Compound-multi	Zero Shot	ESM-1v
1071	GRB2_HUMAN_Faure_2021	40	3	spearman_r	0.216783	Compound-multi	Zero Shot	ESM-1v
1072	DLG4_HUMAN_Faure_2021	80	5	spearman_r	0.365138	Compound-multi	Zero Shot	ESM-1v
1073	GRB2_HUMAN_Faure_2021	80	4	spearman_r	0.537331	Compound-multi	Zero Shot	ESM-1v
1074	F7YBW8_MESOW_Aakre_2015	20	4	spearman_r	0.453261	Compound-multi	Zero Shot	ESM-1v
1075	A4_HUMAN_Seuma_2021	80	4	spearman_r	0.122467	Local-single	Zero Shot	ESM-1v
1076	GRB2_HUMAN_Faure_2021	40	3	spearman_r	0.607109	Local-single	Zero Shot	ESM-1v
1077	PABP_YEAST_Melamed_2013	320	2	spearman_r	0.722533	Compound-multi	Zero Shot	ESM-1v
1078	DLG4_HUMAN_Faure_2021	80	5	spearman_r	0.394903	Local-single	Zero Shot	ESM-1v
1079	PABP_YEAST_Melamed_2013	320	4	spearman_r	0.778471	Compound-multi	Zero Shot	ESM-1v
1080	PABP_YEAST_Melamed_2013	80	1	spearman_r	0.804248	Local-single	Zero Shot	ESM-1v
1081	GRB2_HUMAN_Faure_2021	80	2	spearman_r	0.408543	Compound-multi	Zero Shot	ESM-1v
1082	DLG4_HUMAN_Faure_2021	320	3	spearman_r	0.358084	Compound-multi	Zero Shot	ESM-1v
1083	CAPSD_AAV2S_Sinai_substitutions_2021	320	2	spearman_r	0.160929	Local-single	Zero Shot	ESM-1v
1084	YAP1_HUMAN_Araya_2012	80	1	spearman_r	0.358128	Compound-multi	Zero Shot	ESM-1v
1085	SPG1_STRSG_Olson_2014	160	3	spearman_r	0.326242	Local-single	Zero Shot	ESM-1v
1086	DLG4_HUMAN_Faure_2021	320	1	spearman_r	0.526643	Local-single	Zero Shot	ESM-1v
1087	CAPSD_AAV2S_Sinai_substitutions_2021	320	4	spearman_r	0.289528	Local-single	Zero Shot	ESM-1v
1088	SPG1_STRSG_Olson_2014	80	2	spearman_r	0.195741	Compound-multi	Zero Shot	ESM-1v
1089	YAP1_HUMAN_Araya_2012	40	4	spearman_r	0.297426	Compound-multi	Zero Shot	ESM-1v
1090	CAPSD_AAV2S_Sinai_substitutions_2021	320	2	spearman_r	0.091199	Compound-multi	Zero Shot	ESM-1v
1091	GRB2_HUMAN_Faure_2021	160	1	spearman_r	0.328545	Compound-multi	Zero Shot	ESM-1v
1092	GCN4_YEAST_Staller_induction_2018	20	2	spearman_r	0.561039	Local-single	Zero Shot	ESM-1v
1093	DLG4_HUMAN_Faure_2021	20	2	spearman_r	0.127273	Compound-multi	Zero Shot	ESM-1v
1094	GFP_AEQVI_Sarkisyan_2016	80	5	spearman_r	0.0114509	Compound-multi	Zero Shot	ESM-1v
1095	GFP_AEQVI_Sarkisyan_2016	320	1	spearman_r	0.0658563	Compound-multi	Zero Shot	ESM-1v
1096	CAPSD_AAV2S_Sinai_substitutions_2021	20	5	spearman_r	0.254545	Compound-multi	Zero Shot	ESM-1v
1097	YAP1_HUMAN_Araya_2012	20	4	spearman_r	0.661778	Local-single	Zero Shot	ESM-1v
1098	CAPSD_AAV2S_Sinai_substitutions_2021	160	2	spearman_r	0.120386	Local-single	Zero Shot	ESM-1v
1099	GRB2_HUMAN_Faure_2021	160	5	spearman_r	0.42426	Compound-multi	Zero Shot	ESM-1v
1100	DLG4_HUMAN_Faure_2021	320	1	spearman_r	0.475774	Compound-multi	Zero Shot	ESM-1v
1101	DLG4_HUMAN_Faure_2021	160	1	spearman_r	0.469215	Compound-multi	Zero Shot	ESM-1v
1102	SPG1_STRSG_Olson_2014	160	3	spearman_r	0.359162	Compound-multi	Zero Shot	ESM-1v
1103	CAPSD_AAV2S_Sinai_substitutions_2021	20	3	spearman_r	0.23055	Local-single	Zero Shot	ESM-1v
1104	GFP_AEQVI_Sarkisyan_2016	80	4	spearman_r	0.0837935	Compound-multi	Zero Shot	ESM-1v
1105	A4_HUMAN_Seuma_2021	20	5	spearman_r	0.22807	Compound-multi	Zero Shot	ESM-1v
1106	DLG4_HUMAN_Faure_2021	160	1	spearman_r	0.40691	Local-single	Zero Shot	ESM-1v
1107	YAP1_HUMAN_Araya_2012	20	2	spearman_r	0.519212	Local-single	Zero Shot	ESM-1v
1108	GFP_AEQVI_Sarkisyan_2016	80	5	spearman_r	0.0253368	Local-single	Zero Shot	ESM-1v
1109	SPG1_STRSG_Olson_2014	320	4	spearman_r	0.334786	Local-single	Zero Shot	ESM-1v
1110	CAPSD_AAV2S_Sinai_substitutions_2021	320	4	spearman_r	0.0893657	Compound-multi	Zero Shot	ESM-1v
1111	SPG1_STRSG_Olson_2014	80	2	spearman_r	0.245795	Local-single	Zero Shot	ESM-1v
1112	CAPSD_AAV2S_Sinai_substitutions_2021	20	3	spearman_r	0.617582	Compound-multi	Zero Shot	ESM-1v
1113	GRB2_HUMAN_Faure_2021	80	1	spearman_r	0.491101	Local-single	Zero Shot	ESM-1v
1114	A4_HUMAN_Seuma_2021	160	5	spearman_r	0.417426	Compound-multi	Zero Shot	ESM-1v
1115	YAP1_HUMAN_Araya_2012	40	4	spearman_r	0.506651	Local-single	Zero Shot	ESM-1v
1116	YAP1_HUMAN_Araya_2012	80	4	spearman_r	0.247037	Compound-multi	Zero Shot	ESM-1v
1117	SPG1_STRSG_Olson_2014	320	3	spearman_r	0.0305155	Compound-multi	Zero Shot	ESM-1v
1118	SPG1_STRSG_Olson_2014	40	2	spearman_r	0.277103	Local-single	Zero Shot	ESM-1v
1119	SPG1_STRSG_Olson_2014	320	3	spearman_r	0.0191525	Local-single	Zero Shot	ESM-1v
1120	CAPSD_AAV2S_Sinai_substitutions_2021	80	2	spearman_r	0.120331	Compound-multi	Zero Shot	ESM-1v
1121	GFP_AEQVI_Sarkisyan_2016	320	1	spearman_r	0.0268945	Local-single	Zero Shot	ESM-1v
1122	A4_HUMAN_Seuma_2021	320	5	spearman_r	0.48104	Local-single	Zero Shot	ESM-1v
1123	YAP1_HUMAN_Araya_2012	160	3	spearman_r	0.195564	Compound-multi	Zero Shot	ESM-1v
1124	SPG1_STRSG_Olson_2014	20	2	spearman_r	0.22311	Local-single	Zero Shot	ESM-1v
1125	DLG4_HUMAN_Faure_2021	80	2	spearman_r	0.301215	Compound-multi	Zero Shot	ESM-1v
1126	YAP1_HUMAN_Araya_2012	40	2	spearman_r	0.443906	Compound-multi	Zero Shot	ESM-1v
1127	GFP_AEQVI_Sarkisyan_2016	40	5	spearman_r	0.144118	Compound-multi	Zero Shot	ESM-1v
1128	SPG1_STRSG_Olson_2014	20	5	spearman_r	0.201878	Compound-multi	Zero Shot	ESM-1v
1129	YAP1_HUMAN_Araya_2012	80	3	spearman_r	0.523603	Local-single	Zero Shot	ESM-1v
1130	CAPSD_AAV2S_Sinai_substitutions_2021	40	2	spearman_r	0.567864	Local-single	Zero Shot	ESM-1v
1131	GFP_AEQVI_Sarkisyan_2016	40	4	spearman_r	0.418686	Local-single	Zero Shot	ESM-1v
1132	GRB2_HUMAN_Faure_2021	320	1	spearman_r	0.577219	Local-single	Zero Shot	ESM-1v
1133	DLG4_HUMAN_Faure_2021	80	2	spearman_r	0.308244	Local-single	Zero Shot	ESM-1v
1134	DLG4_HUMAN_Faure_2021	20	2	spearman_r	0.715543	Local-single	Zero Shot	ESM-1v
1135	CAPSD_AAV2S_Sinai_substitutions_2021	40	5	spearman_r	0.139005	Compound-multi	Zero Shot	ESM-1v
1136	A4_HUMAN_Seuma_2021	40	5	spearman_r	0.455406	Local-single	Zero Shot	ESM-1v
1137	YAP1_HUMAN_Araya_2012	20	4	spearman_r	0.230769	Compound-multi	Zero Shot	ESM-1v
1138	GFP_AEQVI_Sarkisyan_2016	80	3	spearman_r	0.0338983	Compound-multi	Zero Shot	ESM-1v
1139	GRB2_HUMAN_Faure_2021	160	1	spearman_r	0.620035	Local-single	Zero Shot	ESM-1v
1140	DLG4_HUMAN_Faure_2021	40	2	spearman_r	0.731868	Compound-multi	Zero Shot	ESM-1v
1141	GFP_AEQVI_Sarkisyan_2016	40	1	spearman_r	0.00629052	Local-single	Zero Shot	ESM-1v
1142	CAPSD_AAV2S_Sinai_substitutions_2021	20	5	spearman_r	0.0434402	Local-single	Zero Shot	ESM-1v
1143	GRB2_HUMAN_Faure_2021	320	1	spearman_r	0.569117	Compound-multi	Zero Shot	ESM-1v
1144	SPG1_STRSG_Olson_2014	40	2	spearman_r	0.164661	Compound-multi	Zero Shot	ESM-1v
1145	YAP1_HUMAN_Araya_2012	160	3	spearman_r	0.339265	Local-single	Zero Shot	ESM-1v
1146	GFP_AEQVI_Sarkisyan_2016	40	5	spearman_r	0.0501357	Local-single	Zero Shot	ESM-1v
1147	CAPSD_AAV2S_Sinai_substitutions_2021	80	2	spearman_r	0.00200482	Local-single	Zero Shot	ESM-1v
1148	SPG1_STRSG_Olson_2014	160	4	spearman_r	0.250603	Compound-multi	Zero Shot	ESM-1v
1149	YAP1_HUMAN_Araya_2012	40	1	spearman_r	0.374846	Local-single	Zero Shot	ESM-1v
1150	A4_HUMAN_Seuma_2021	320	4	spearman_r	0.426796	Local-single	Zero Shot	ESM-1v
1151	DLG4_HUMAN_Faure_2021	40	2	spearman_r	0.572185	Local-single	Zero Shot	ESM-1v
1152	DLG4_HUMAN_Faure_2021	160	2	spearman_r	0.529779	Compound-multi	Zero Shot	ESM-1v
1153	SPG1_STRSG_Olson_2014	160	2	spearman_r	0.162306	Compound-multi	Zero Shot	ESM-1v
1154	CAPSD_AAV2S_Sinai_substitutions_2021	160	4	spearman_r	0.0944079	Local-single	Zero Shot	ESM-1v
1155	GFP_AEQVI_Sarkisyan_2016	160	1	spearman_r	0.11408	Compound-multi	Zero Shot	ESM-1v
1156	CAPSD_AAV2S_Sinai_substitutions_2021	320	3	spearman_r	0.196294	Compound-multi	Zero Shot	ESM-1v
1157	SPG1_STRSG_Olson_2014	20	3	spearman_r	0.10078	Compound-multi	Zero Shot	ESM-1v
1158	YAP1_HUMAN_Araya_2012	20	5	spearman_r	0.324631	Local-single	Zero Shot	ESM-1v
1159	A4_HUMAN_Seuma_2021	20	5	spearman_r	0.497479	Local-single	Zero Shot	ESM-1v
1160	SPG1_STRSG_Olson_2014	320	4	spearman_r	0.26441	Compound-multi	Zero Shot	ESM-1v
1161	SPG1_STRSG_Olson_2014	40	3	spearman_r	0.0449183	Local-single	Zero Shot	ESM-1v
1162	YAP1_HUMAN_Araya_2012	160	5	spearman_r	0.432543	Local-single	Zero Shot	ESM-1v
1163	CAPSD_AAV2S_Sinai_substitutions_2021	160	3	spearman_r	0.301404	Local-single	Zero Shot	ESM-1v
1164	GRB2_HUMAN_Faure_2021	20	1	spearman_r	0.76562	Local-single	Zero Shot	ESM-1v
1165	YAP1_HUMAN_Araya_2012	20	5	spearman_r	0.3	Compound-multi	Zero Shot	ESM-1v
1166	YAP1_HUMAN_Araya_2012	160	1	spearman_r	0.250675	Compound-multi	Zero Shot	ESM-1v
1167	DLG4_HUMAN_Faure_2021	20	1	spearman_r	0.186813	Compound-multi	Zero Shot	ESM-1v
1168	GFP_AEQVI_Sarkisyan_2016	160	5	spearman_r	0.171179	Local-single	Zero Shot	ESM-1v
1169	CAPSD_AAV2S_Sinai_substitutions_2021	40	4	spearman_r	0.263936	Local-single	Zero Shot	ESM-1v
1170	CAPSD_AAV2S_Sinai_substitutions_2021	80	4	spearman_r	0.348601	Compound-multi	Zero Shot	ESM-1v
1171	GFP_AEQVI_Sarkisyan_2016	320	5	spearman_r	0.0557579	Compound-multi	Zero Shot	ESM-1v
1172	CAPSD_AAV2S_Sinai_substitutions_2021	40	4	spearman_r	0.0307473	Compound-multi	Zero Shot	ESM-1v
1173	YAP1_HUMAN_Araya_2012	160	1	spearman_r	0.449381	Local-single	Zero Shot	ESM-1v
1174	GFP_AEQVI_Sarkisyan_2016	320	5	spearman_r	0.129892	Local-single	Zero Shot	ESM-1v
1175	YAP1_HUMAN_Araya_2012	40	5	spearman_r	0.295064	Local-single	Zero Shot	ESM-1v
1176	CAPSD_AAV2S_Sinai_substitutions_2021	20	4	spearman_r	0.114706	Compound-multi	Zero Shot	ESM-1v
1177	YAP1_HUMAN_Araya_2012	80	5	spearman_r	0.438731	Compound-multi	Zero Shot	ESM-1v
1178	SPG1_STRSG_Olson_2014	40	3	spearman_r	0.0912213	Compound-multi	Zero Shot	ESM-1v
1179	YAP1_HUMAN_Araya_2012	160	5	spearman_r	0.308312	Compound-multi	Zero Shot	ESM-1v
1180	CAPSD_AAV2S_Sinai_substitutions_2021	20	4	spearman_r	0.453332	Local-single	Zero Shot	ESM-1v
1181	GFP_AEQVI_Sarkisyan_2016	80	1	spearman_r	0.0551458	Local-single	Zero Shot	ESM-1v
1182	YAP1_HUMAN_Araya_2012	80	5	spearman_r	0.537203	Local-single	Zero Shot	ESM-1v
1183	CAPSD_AAV2S_Sinai_substitutions_2021	320	3	spearman_r	0.207577	Local-single	Zero Shot	ESM-1v
1184	YAP1_HUMAN_Araya_2012	40	5	spearman_r	0.38237	Compound-multi	Zero Shot	ESM-1v
1185	GFP_AEQVI_Sarkisyan_2016	80	4	spearman_r	0.133559	Local-single	Zero Shot	ESM-1v
1186	GRB2_HUMAN_Faure_2021	20	1	spearman_r	0.184416	Compound-multi	Zero Shot	ESM-1v
1187	SPG1_STRSG_Olson_2014	20	3	spearman_r	0.360762	Local-single	Zero Shot	ESM-1v
1188	GRB2_HUMAN_Faure_2021	80	1	spearman_r	0.366206	Compound-multi	Zero Shot	ESM-1v
1189	SPG1_STRSG_Olson_2014	320	2	spearman_r	0.249696	Local-single	Zero Shot	ESM-1v
1190	SPG1_STRSG_Olson_2014	160	4	spearman_r	0.266924	Local-single	Zero Shot	ESM-1v
1191	GRB2_HUMAN_Faure_2021	40	1	spearman_r	0.368032	Local-single	Zero Shot	ESM-1v
1192	GFP_AEQVI_Sarkisyan_2016	160	5	spearman_r	0.0335443	Compound-multi	Zero Shot	ESM-1v
1193	SPG1_STRSG_Olson_2014	160	2	spearman_r	0.0981965	Local-single	Zero Shot	ESM-1v
1194	DLG4_HUMAN_Faure_2021	80	1	spearman_r	0.335009	Compound-multi	Zero Shot	ESM-1v
1195	CAPSD_AAV2S_Sinai_substitutions_2021	40	3	spearman_r	0.248558	Local-single	Zero Shot	ESM-1v
1196	YAP1_HUMAN_Araya_2012	80	4	spearman_r	0.447301	Local-single	Zero Shot	ESM-1v
1197	GRB2_HUMAN_Faure_2021	320	5	spearman_r	0.561334	Local-single	Zero Shot	ESM-1v
1198	CAPSD_AAV2S_Sinai_substitutions_2021	160	4	spearman_r	0.00253205	Compound-multi	Zero Shot	ESM-1v
1199	GFP_AEQVI_Sarkisyan_2016	160	1	spearman_r	0.0815397	Local-single	Zero Shot	ESM-1v
1200	GRB2_HUMAN_Faure_2021	320	5	spearman_r	0.385783	Compound-multi	Zero Shot	ESM-1v
1201	DLG4_HUMAN_Faure_2021	80	1	spearman_r	0.304064	Local-single	Zero Shot	ESM-1v
1202	GFP_AEQVI_Sarkisyan_2016	80	1	spearman_r	0.191775	Compound-multi	Zero Shot	ESM-1v
1203	CAPSD_AAV2S_Sinai_substitutions_2021	40	3	spearman_r	0.351114	Compound-multi	Zero Shot	ESM-1v
1204	GFP_AEQVI_Sarkisyan_2016	160	4	spearman_r	0.0643737	Compound-multi	Zero Shot	ESM-1v
1205	YAP1_HUMAN_Araya_2012	80	1	spearman_r	0.587373	Local-single	Zero Shot	ESM-1v
1206	CAPSD_AAV2S_Sinai_substitutions_2021	160	3	spearman_r	0.230046	Compound-multi	Zero Shot	ESM-1v
1207	SPG1_STRSG_Olson_2014	80	3	spearman_r	0.12312	Local-single	Zero Shot	ESM-1v
1208	A4_HUMAN_Seuma_2021	320	5	spearman_r	0.425982	Compound-multi	Zero Shot	ESM-1v
1209	SPG1_STRSG_Olson_2014	80	3	spearman_r	0.0735339	Compound-multi	Zero Shot	ESM-1v
1210	DLG4_HUMAN_Faure_2021	20	1	spearman_r	0.746779	Local-single	Zero Shot	ESM-1v
1211	YAP1_HUMAN_Araya_2012	160	4	spearman_r	0.532792	Local-single	Zero Shot	ESM-1v
1212	YAP1_HUMAN_Araya_2012	20	2	spearman_r	0.411765	Compound-multi	Zero Shot	ESM-1v
1213	GRB2_HUMAN_Faure_2021	80	5	spearman_r	0.713401	Local-single	Zero Shot	ESM-1v
1214	CAPSD_AAV2S_Sinai_substitutions_2021	80	3	spearman_r	0.301035	Local-single	Zero Shot	ESM-1v
1215	DLG4_HUMAN_Faure_2021	40	1	spearman_r	0.530522	Local-single	Zero Shot	ESM-1v
1216	GRB2_HUMAN_Faure_2021	40	1	spearman_r	0.393407	Compound-multi	Zero Shot	ESM-1v
1217	DLG4_HUMAN_Faure_2021	40	1	spearman_r	0.525806	Compound-multi	Zero Shot	ESM-1v
1218	CAPSD_AAV2S_Sinai_substitutions_2021	80	4	spearman_r	0.306467	Local-single	Zero Shot	ESM-1v
1219	SPG1_STRSG_Olson_2014	320	2	spearman_r	0.232638	Compound-multi	Zero Shot	ESM-1v
1220	GFP_AEQVI_Sarkisyan_2016	80	3	spearman_r	0.117471	Local-single	Zero Shot	ESM-1v
1221	YAP1_HUMAN_Araya_2012	160	4	spearman_r	0.406964	Compound-multi	Zero Shot	ESM-1v
1222	CAPSD_AAV2S_Sinai_substitutions_2021	80	3	spearman_r	0.23873	Compound-multi	Zero Shot	ESM-1v
1223	A4_HUMAN_Seuma_2021	40	5	spearman_r	0.343789	Compound-multi	Zero Shot	ESM-1v
1224	CAPSD_AAV2S_Sinai_substitutions_2021	40	5	spearman_r	0.345345	Local-single	Zero Shot	ESM-1v
1225	CAPSD_AAV2S_Sinai_substitutions_2021	160	2	spearman_r	0.0995167	Compound-multi	Zero Shot	ESM-1v
1226	YAP1_HUMAN_Araya_2012	20	1	spearman_r	0.0810117	Local-single	Zero Shot	ESM-1v
1227	SPG1_STRSG_Olson_2014	320	5	spearman_r	0.193367	Local-single	Zero Shot	ESM-1v
1228	GRB2_HUMAN_Faure_2021	160	5	spearman_r	0.592455	Local-single	Zero Shot	ESM-1v
1229	DLG4_HUMAN_Faure_2021	40	3	spearman_r	0.536656	Local-single	Zero Shot	ESM-1v
1230	SPG1_STRSG_Olson_2014	20	5	spearman_r	0.409563	Local-single	Zero Shot	ESM-1v
1231	YAP1_HUMAN_Araya_2012	20	3	spearman_r	0.357576	Compound-multi	Zero Shot	ESM-1v
1232	CAPSD_AAV2S_Sinai_substitutions_2021	160	5	spearman_r	0.107603	Local-single	Zero Shot	ESM-1v
1233	GRB2_HUMAN_Faure_2021	40	2	spearman_r	0.661952	Compound-multi	Zero Shot	ESM-1v
1234	CAPSD_AAV2S_Sinai_substitutions_2021	160	1	spearman_r	0.0549017	Local-single	Zero Shot	ESM-1v
1235	GFP_AEQVI_Sarkisyan_2016	20	5	spearman_r	0.357576	Compound-multi	Zero Shot	ESM-1v
1236	DLG4_HUMAN_Faure_2021	40	3	spearman_r	0.0705882	Compound-multi	Zero Shot	ESM-1v
1237	SPG1_STRSG_Olson_2014	160	1	spearman_r	0.294457	Local-single	Zero Shot	ESM-1v
1238	SPG1_STRSG_Olson_2014	40	4	spearman_r	0.00678883	Compound-multi	Zero Shot	ESM-1v
1239	CAPSD_AAV2S_Sinai_substitutions_2021	320	5	spearman_r	0.0291817	Compound-multi	Zero Shot	ESM-1v
1240	YAP1_HUMAN_Araya_2012	20	3	spearman_r	0.337097	Local-single	Zero Shot	ESM-1v
1241	CAPSD_AAV2S_Sinai_substitutions_2021	320	1	spearman_r	0.143971	Compound-multi	Zero Shot	ESM-1v
1242	DLG4_HUMAN_Faure_2021	20	3	spearman_r	0.270528	Local-single	Zero Shot	ESM-1v
1243	CAPSD_AAV2S_Sinai_substitutions_2021	160	5	spearman_r	0.0685144	Compound-multi	Zero Shot	ESM-1v
1244	GRB2_HUMAN_Faure_2021	20	2	spearman_r	0.316555	Local-single	Zero Shot	ESM-1v
1245	CAPSD_AAV2S_Sinai_substitutions_2021	320	1	spearman_r	0.181124	Local-single	Zero Shot	ESM-1v
1246	SPG1_STRSG_Olson_2014	320	1	spearman_r	0.185034	Compound-multi	Zero Shot	ESM-1v
1247	YAP1_HUMAN_Araya_2012	40	2	spearman_r	0.624286	Local-single	Zero Shot	ESM-1v
1248	DLG4_HUMAN_Faure_2021	20	3	spearman_r	0.538462	Compound-multi	Zero Shot	ESM-1v
1249	GCN4_YEAST_Staller_induction_2018	20	1	spearman_r	0.561039	Local-single	Zero Shot	ESM-1v
1250	YAP1_HUMAN_Araya_2012	40	3	spearman_r	0.210096	Compound-multi	Zero Shot	ESM-1v
1251	GFP_AEQVI_Sarkisyan_2016	20	2	spearman_r	0.0181818	Compound-multi	Zero Shot	ESM-1v
1252	A4_HUMAN_Seuma_2021	80	5	spearman_r	0.454425	Local-single	Zero Shot	ESM-1v
1253	A4_HUMAN_Seuma_2021	320	4	spearman_r	0.363608	Compound-multi	Zero Shot	ESM-1v
1254	DLG4_HUMAN_Faure_2021	320	2	spearman_r	0.35542	Local-single	Zero Shot	ESM-1v
1255	CAPSD_AAV2S_Sinai_substitutions_2021	160	1	spearman_r	0.0263747	Compound-multi	Zero Shot	ESM-1v
1256	SPG1_STRSG_Olson_2014	160	1	spearman_r	0.30982	Compound-multi	Zero Shot	ESM-1v
1257	GFP_AEQVI_Sarkisyan_2016	320	4	spearman_r	0.0988265	Compound-multi	Zero Shot	ESM-1v
1258	SPG1_STRSG_Olson_2014	80	1	spearman_r	0.118089	Compound-multi	Zero Shot	ESM-1v
1259	GFP_AEQVI_Sarkisyan_2016	20	1	spearman_r	0.406061	Compound-multi	Zero Shot	ESM-1v
1260	YAP1_HUMAN_Araya_2012	80	2	spearman_r	0.474803	Local-single	Zero Shot	ESM-1v
1261	DLG4_HUMAN_Faure_2021	160	3	spearman_r	0.396071	Local-single	Zero Shot	ESM-1v
1262	CAPSD_AAV2S_Sinai_substitutions_2021	40	1	spearman_r	0.149015	Local-single	Zero Shot	ESM-1v
1263	YAP1_HUMAN_Araya_2012	20	1	spearman_r	0.49011	Compound-multi	Zero Shot	ESM-1v
1264	SPG1_STRSG_Olson_2014	80	4	spearman_r	0.144494	Compound-multi	Zero Shot	ESM-1v
1265	YAP1_HUMAN_Araya_2012	80	2	spearman_r	0.22479	Compound-multi	Zero Shot	ESM-1v
1266	GFP_AEQVI_Sarkisyan_2016	20	1	spearman_r	0.06	Local-single	Zero Shot	ESM-1v
1267	DLG4_HUMAN_Faure_2021	160	3	spearman_r	0.486425	Compound-multi	Zero Shot	ESM-1v
1268	CAPSD_AAV2S_Sinai_substitutions_2021	80	1	spearman_r	0.212802	Compound-multi	Zero Shot	ESM-1v
1269	SPG1_STRSG_Olson_2014	40	4	spearman_r	0.0275301	Local-single	Zero Shot	ESM-1v
1270	SPG1_STRSG_Olson_2014	80	1	spearman_r	0.0832033	Local-single	Zero Shot	ESM-1v
1271	YAP1_HUMAN_Araya_2012	160	2	spearman_r	0.226554	Compound-multi	Zero Shot	ESM-1v
1272	CAPSD_AAV2S_Sinai_substitutions_2021	320	5	spearman_r	0.136927	Local-single	Zero Shot	ESM-1v
1273	DLG4_HUMAN_Faure_2021	80	3	spearman_r	0.498058	Local-single	Zero Shot	ESM-1v
1274	A4_HUMAN_Seuma_2021	80	5	spearman_r	0.43074	Compound-multi	Zero Shot	ESM-1v
1275	CAPSD_AAV2S_Sinai_substitutions_2021	80	1	spearman_r	0.00603066	Local-single	Zero Shot	ESM-1v
1276	SPG1_STRSG_Olson_2014	80	4	spearman_r	0.254043	Local-single	Zero Shot	ESM-1v
1277	GFP_AEQVI_Sarkisyan_2016	320	4	spearman_r	0.0924732	Local-single	Zero Shot	ESM-1v
1278	GFP_AEQVI_Sarkisyan_2016	40	4	spearman_r	0.213439	Compound-multi	Zero Shot	ESM-1v
1279	GRB2_HUMAN_Faure_2021	40	2	spearman_r	0.602529	Local-single	Zero Shot	ESM-1v
1280	YAP1_HUMAN_Araya_2012	160	2	spearman_r	0.356795	Local-single	Zero Shot	ESM-1v
1281	DLG4_HUMAN_Faure_2021	80	3	spearman_r	0.295918	Compound-multi	Zero Shot	ESM-1v
1282	PABP_YEAST_Melamed_2013	20	1	spearman_r	0.635165	Compound-multi	Zero Shot	ESM-1v
1283	GFP_AEQVI_Sarkisyan_2016	20	2	spearman_r	0.127595	Local-single	Zero Shot	ESM-1v
1284	CAPSD_AAV2S_Sinai_substitutions_2021	80	5	spearman_r	0.147534	Local-single	Zero Shot	ESM-1v
1285	A4_HUMAN_Seuma_2021	160	5	spearman_r	0.463631	Local-single	Zero Shot	ESM-1v
1286	CAPSD_AAV2S_Sinai_substitutions_2021	80	5	spearman_r	0.123758	Compound-multi	Zero Shot	ESM-1v
1287	DLG4_HUMAN_Faure_2021	160	2	spearman_r	0.598535	Local-single	Zero Shot	ESM-1v
1288	SPG1_STRSG_Olson_2014	20	2	spearman_r	0.343495	Compound-multi	Zero Shot	ESM-1v
1289	GRB2_HUMAN_Faure_2021	20	2	spearman_r	0.807692	Compound-multi	Zero Shot	ESM-1v
1290	GRB2_HUMAN_Faure_2021	80	5	spearman_r	0.298767	Compound-multi	Zero Shot	ESM-1v
1291	SPG1_STRSG_Olson_2014	20	4	spearman_r	0.276161	Local-single	Zero Shot	ESM-1v
1292	GFP_AEQVI_Sarkisyan_2016	20	5	spearman_r	0.14591	Local-single	Zero Shot	ESM-1v
1293	YAP1_HUMAN_Araya_2012	40	1	spearman_r	0.385837	Compound-multi	Zero Shot	ESM-1v
1294	YAP1_HUMAN_Araya_2012	80	3	spearman_r	0.419742	Compound-multi	Zero Shot	ESM-1v
1295	HIS7_YEAST_Pokusaeva_2019	20	1	spearman_r	0.690909	Compound-multi	Zero Shot	ESM-1v
1296	GFP_AEQVI_Sarkisyan_2016	40	1	spearman_r	0.197059	Compound-multi	Zero Shot	ESM-1v
1297	SPG1_STRSG_Olson_2014	20	4	spearman_r	0.329274	Compound-multi	Zero Shot	ESM-1v
1298	CAPSD_AAV2S_Sinai_substitutions_2021	40	2	spearman_r	0.0027629	Compound-multi	Zero Shot	ESM-1v
1299	GFP_AEQVI_Sarkisyan_2016	160	4	spearman_r	0.0806435	Local-single	Zero Shot	ESM-1v
1300	DLG4_HUMAN_Faure_2021	320	2	spearman_r	0.443226	Compound-multi	Zero Shot	ESM-1v
1301	YAP1_HUMAN_Araya_2012	40	3	spearman_r	0.488778	Local-single	Zero Shot	ESM-1v
1302	CAPSD_AAV2S_Sinai_substitutions_2021	20	2	spearman_r	0.6	Compound-multi	Zero Shot	ESM-1v
1303	SPG1_STRSG_Olson_2014	320	1	spearman_r	0.19662	Local-single	Zero Shot	ESM-1v
1304	CAPSD_AAV2S_Sinai_substitutions_2021	20	2	spearman_r	0.127038	Local-single	Zero Shot	ESM-1v
1305	F7YBW8_MESOW_Aakre_2015	20	2	spearman_r	0.484518	Compound-multi	Zero Shot	ESM-2
1306	GRB2_HUMAN_Faure_2021	320	4	spearman_r	0.613963	Local-single	Zero Shot	ESM-2
1307	PABP_YEAST_Melamed_2013	40	3	spearman_r	0.742095	Compound-multi	Zero Shot	ESM-2
1308	YAP1_HUMAN_Araya_2012	20	4	spearman_r	0.643956	Compound-multi	Zero Shot	ESM-2
1309	PABP_YEAST_Melamed_2013	320	1	spearman_r	0.768815	Compound-multi	Zero Shot	ESM-2
1310	A4_HUMAN_Seuma_2021	40	2	spearman_r	0.428723	Compound-multi	Zero Shot	ESM-2
1311	GFP_AEQVI_Sarkisyan_2016	40	1	spearman_r	0.138235	Compound-multi	Zero Shot	ESM-2
1312	SPG1_STRSG_Olson_2014	160	4	spearman_r	0.306698	Local-single	Zero Shot	ESM-2
1313	YAP1_HUMAN_Araya_2012	160	2	spearman_r	0.499782	Compound-multi	Zero Shot	ESM-2
1314	GRB2_HUMAN_Faure_2021	20	4	spearman_r	0.471429	Local-single	Zero Shot	ESM-2
1315	YAP1_HUMAN_Araya_2012	20	5	spearman_r	0.518182	Compound-multi	Zero Shot	ESM-2
1316	A4_HUMAN_Seuma_2021	80	5	spearman_r	0.41521	Compound-multi	Zero Shot	ESM-2
1317	GFP_AEQVI_Sarkisyan_2016	160	5	spearman_r	0.0773789	Local-single	Zero Shot	ESM-2
1318	YAP1_HUMAN_Araya_2012	160	3	spearman_r	0.302895	Compound-multi	Zero Shot	ESM-2
1319	PABP_YEAST_Melamed_2013	80	2	spearman_r	0.735758	Compound-multi	Zero Shot	ESM-2
1320	GRB2_HUMAN_Faure_2021	40	4	spearman_r	0.493832	Compound-multi	Zero Shot	ESM-2
1321	YAP1_HUMAN_Araya_2012	160	4	spearman_r	0.543732	Compound-multi	Zero Shot	ESM-2
1322	CAPSD_AAV2S_Sinai_substitutions_2021	80	4	spearman_r	0.29051	Local-single	Zero Shot	ESM-2
1323	PABP_YEAST_Melamed_2013	160	1	spearman_r	0.635124	Compound-multi	Zero Shot	ESM-2
1324	PABP_YEAST_Melamed_2013	20	3	spearman_r	0.301136	Local-single	Zero Shot	ESM-2
1325	F7YBW8_MESOW_Aakre_2015	20	1	spearman_r	0.648024	Compound-multi	Zero Shot	ESM-2
1326	A4_HUMAN_Seuma_2021	40	5	spearman_r	0.521486	Compound-multi	Zero Shot	ESM-2
1327	SPG1_STRSG_Olson_2014	320	3	spearman_r	0.125483	Local-single	Zero Shot	ESM-2
1328	YAP1_HUMAN_Araya_2012	20	2	spearman_r	0.141176	Compound-multi	Zero Shot	ESM-2
1329	HIS7_YEAST_Pokusaeva_2019	40	3	spearman_r	0.0274121	Compound-multi	Zero Shot	ESM-2
1330	SPG1_STRSG_Olson_2014	40	4	spearman_r	0.188189	Local-single	Zero Shot	ESM-2
1331	GFP_AEQVI_Sarkisyan_2016	320	4	spearman_r	0.122587	Local-single	Zero Shot	ESM-2
1332	GRB2_HUMAN_Faure_2021	320	5	spearman_r	0.48797	Compound-multi	Zero Shot	ESM-2
1333	A4_HUMAN_Seuma_2021	40	2	spearman_r	0.420413	Local-single	Zero Shot	ESM-2
1334	A4_HUMAN_Seuma_2021	320	3	spearman_r	0.363314	Compound-multi	Zero Shot	ESM-2
1335	CAPSD_AAV2S_Sinai_substitutions_2021	80	5	spearman_r	0.271171	Compound-multi	Zero Shot	ESM-2
1336	CAPSD_AAV2S_Sinai_substitutions_2021	40	4	spearman_r	0.220184	Local-single	Zero Shot	ESM-2
1337	YAP1_HUMAN_Araya_2012	160	4	spearman_r	0.580282	Local-single	Zero Shot	ESM-2
1338	SPG1_STRSG_Olson_2014	80	3	spearman_r	0.0242266	Compound-multi	Zero Shot	ESM-2
1339	CAPSD_AAV2S_Sinai_substitutions_2021	80	4	spearman_r	0.358855	Compound-multi	Zero Shot	ESM-2
1340	YAP1_HUMAN_Araya_2012	40	2	spearman_r	0.513685	Compound-multi	Zero Shot	ESM-2
1341	SPG1_STRSG_Olson_2014	320	5	spearman_r	0.250004	Compound-multi	Zero Shot	ESM-2
1342	GFP_AEQVI_Sarkisyan_2016	160	3	spearman_r	0.101893	Compound-multi	Zero Shot	ESM-2
1343	SPG1_STRSG_Olson_2014	80	4	spearman_r	0.32587	Compound-multi	Zero Shot	ESM-2
1344	YAP1_HUMAN_Araya_2012	80	2	spearman_r	0.591359	Local-single	Zero Shot	ESM-2
1345	A4_HUMAN_Seuma_2021	20	2	spearman_r	0.578571	Compound-multi	Zero Shot	ESM-2
1346	YAP1_HUMAN_Araya_2012	40	5	spearman_r	0.346739	Compound-multi	Zero Shot	ESM-2
1347	PABP_YEAST_Melamed_2013	160	1	spearman_r	0.543976	Local-single	Zero Shot	ESM-2
1348	GFP_AEQVI_Sarkisyan_2016	80	1	spearman_r	0.0805476	Local-single	Zero Shot	ESM-2
1349	GRB2_HUMAN_Faure_2021	160	4	spearman_r	0.682042	Compound-multi	Zero Shot	ESM-2
1350	GRB2_HUMAN_Faure_2021	20	4	spearman_r	0.927273	Compound-multi	Zero Shot	ESM-2
1351	CAPSD_AAV2S_Sinai_substitutions_2021	20	4	spearman_r	0.649633	Local-single	Zero Shot	ESM-2
1352	SPG1_STRSG_Olson_2014	20	4	spearman_r	0.400895	Compound-multi	Zero Shot	ESM-2
1353	HIS7_YEAST_Pokusaeva_2019	80	3	spearman_r	0.473847	Compound-multi	Zero Shot	ESM-2
1354	A4_HUMAN_Seuma_2021	40	4	spearman_r	0.189747	Local-single	Zero Shot	ESM-2
1355	SPG1_STRSG_Olson_2014	40	3	spearman_r	0.18185	Compound-multi	Zero Shot	ESM-2
1356	A4_HUMAN_Seuma_2021	80	5	spearman_r	0.484824	Local-single	Zero Shot	ESM-2
1357	GFP_AEQVI_Sarkisyan_2016	20	1	spearman_r	0.466667	Compound-multi	Zero Shot	ESM-2
1358	A4_HUMAN_Seuma_2021	20	4	spearman_r	0.375824	Compound-multi	Zero Shot	ESM-2
1359	YAP1_HUMAN_Araya_2012	40	5	spearman_r	0.398895	Local-single	Zero Shot	ESM-2
1360	A4_HUMAN_Seuma_2021	320	1	spearman_r	0.480894	Local-single	Zero Shot	ESM-2
1361	YAP1_HUMAN_Araya_2012	80	2	spearman_r	0.371117	Compound-multi	Zero Shot	ESM-2
1362	PABP_YEAST_Melamed_2013	40	2	spearman_r	0.562612	Local-single	Zero Shot	ESM-2
1363	SPG1_STRSG_Olson_2014	160	5	spearman_r	0.197394	Local-single	Zero Shot	ESM-2
1364	GFP_AEQVI_Sarkisyan_2016	40	5	spearman_r	0.264706	Compound-multi	Zero Shot	ESM-2
1365	HIS7_YEAST_Pokusaeva_2019	40	2	spearman_r	0.081043	Local-single	Zero Shot	ESM-2
1366	PABP_YEAST_Melamed_2013	80	3	spearman_r	0.638464	Compound-multi	Zero Shot	ESM-2
1367	GFP_AEQVI_Sarkisyan_2016	80	3	spearman_r	0.124312	Compound-multi	Zero Shot	ESM-2
1368	PABP_YEAST_Melamed_2013	40	3	spearman_r	0.170104	Local-single	Zero Shot	ESM-2
1369	CAPSD_AAV2S_Sinai_substitutions_2021	40	5	spearman_r	0.115566	Compound-multi	Zero Shot	ESM-2
1370	HIS7_YEAST_Pokusaeva_2019	40	3	spearman_r	0.237542	Local-single	Zero Shot	ESM-2
1371	SPG1_STRSG_Olson_2014	40	3	spearman_r	0.143311	Local-single	Zero Shot	ESM-2
1372	CAPSD_AAV2S_Sinai_substitutions_2021	320	5	spearman_r	0.16453	Local-single	Zero Shot	ESM-2
1373	A4_HUMAN_Seuma_2021	20	2	spearman_r	0.392308	Local-single	Zero Shot	ESM-2
1374	YAP1_HUMAN_Araya_2012	80	3	spearman_r	0.521485	Compound-multi	Zero Shot	ESM-2
1375	A4_HUMAN_Seuma_2021	320	3	spearman_r	0.487377	Local-single	Zero Shot	ESM-2
1376	GFP_AEQVI_Sarkisyan_2016	320	5	spearman_r	0.210414	Compound-multi	Zero Shot	ESM-2
1377	YAP1_HUMAN_Araya_2012	20	5	spearman_r	0.471429	Local-single	Zero Shot	ESM-2
1378	GFP_AEQVI_Sarkisyan_2016	320	2	spearman_r	0.186962	Compound-multi	Zero Shot	ESM-2
1379	GFP_AEQVI_Sarkisyan_2016	20	1	spearman_r	0.0715385	Local-single	Zero Shot	ESM-2
1380	HIS7_YEAST_Pokusaeva_2019	40	1	spearman_r	0.185612	Local-single	Zero Shot	ESM-2
1381	A4_HUMAN_Seuma_2021	40	3	spearman_r	0.604687	Local-single	Zero Shot	ESM-2
1382	HIS7_YEAST_Pokusaeva_2019	80	1	spearman_r	0.144964	Local-single	Zero Shot	ESM-2
1383	YAP1_HUMAN_Araya_2012	80	3	spearman_r	0.665582	Local-single	Zero Shot	ESM-2
1384	CAPSD_AAV2S_Sinai_substitutions_2021	40	4	spearman_r	0.035343	Compound-multi	Zero Shot	ESM-2
1385	GFP_AEQVI_Sarkisyan_2016	320	3	spearman_r	0.0879483	Compound-multi	Zero Shot	ESM-2
1386	GFP_AEQVI_Sarkisyan_2016	320	4	spearman_r	0.255787	Compound-multi	Zero Shot	ESM-2
1387	A4_HUMAN_Seuma_2021	40	3	spearman_r	0.521167	Compound-multi	Zero Shot	ESM-2
1388	YAP1_HUMAN_Araya_2012	160	2	spearman_r	0.613566	Local-single	Zero Shot	ESM-2
1389	CAPSD_AAV2S_Sinai_substitutions_2021	320	5	spearman_r	0.149531	Compound-multi	Zero Shot	ESM-2
1390	A4_HUMAN_Seuma_2021	20	3	spearman_r	0.327826	Local-single	Zero Shot	ESM-2
1391	GFP_AEQVI_Sarkisyan_2016	40	5	spearman_r	0.00714932	Local-single	Zero Shot	ESM-2
1392	A4_HUMAN_Seuma_2021	20	4	spearman_r	0.590211	Local-single	Zero Shot	ESM-2
1393	GRB2_HUMAN_Faure_2021	80	4	spearman_r	0.65432	Compound-multi	Zero Shot	ESM-2
1394	GRB2_HUMAN_Faure_2021	80	4	spearman_r	0.715365	Local-single	Zero Shot	ESM-2
1395	GCN4_YEAST_Staller_induction_2018	20	5	spearman_r	0.484416	Local-single	Zero Shot	ESM-2
1396	YAP1_HUMAN_Araya_2012	40	4	spearman_r	0.33937	Compound-multi	Zero Shot	ESM-2
1397	A4_HUMAN_Seuma_2021	40	4	spearman_r	0.232771	Compound-multi	Zero Shot	ESM-2
1398	YAP1_HUMAN_Araya_2012	20	2	spearman_r	0.596059	Local-single	Zero Shot	ESM-2
1399	A4_HUMAN_Seuma_2021	20	3	spearman_r	0.0909091	Compound-multi	Zero Shot	ESM-2
1400	PABP_YEAST_Melamed_2013	320	2	spearman_r	0.713692	Compound-multi	Zero Shot	ESM-2
1401	CAPSD_AAV2S_Sinai_substitutions_2021	160	5	spearman_r	0.041406	Compound-multi	Zero Shot	ESM-2
1402	YAP1_HUMAN_Araya_2012	40	2	spearman_r	0.388776	Local-single	Zero Shot	ESM-2
1403	A4_HUMAN_Seuma_2021	160	2	spearman_r	0.349643	Local-single	Zero Shot	ESM-2
1404	CAPSD_AAV2S_Sinai_substitutions_2021	320	4	spearman_r	0.115674	Compound-multi	Zero Shot	ESM-2
1405	GFP_AEQVI_Sarkisyan_2016	20	5	spearman_r	0.309091	Compound-multi	Zero Shot	ESM-2
1406	CAPSD_AAV2S_Sinai_substitutions_2021	20	5	spearman_r	0.143232	Local-single	Zero Shot	ESM-2
1407	HIS7_YEAST_Pokusaeva_2019	20	2	spearman_r	0.0361538	Local-single	Zero Shot	ESM-2
1408	HIS7_YEAST_Pokusaeva_2019	20	3	spearman_r	0.544927	Compound-multi	Zero Shot	ESM-2
1409	YAP1_HUMAN_Araya_2012	20	3	spearman_r	0.0290323	Local-single	Zero Shot	ESM-2
1410	SPG1_STRSG_Olson_2014	160	3	spearman_r	0.452992	Local-single	Zero Shot	ESM-2
1411	YAP1_HUMAN_Araya_2012	40	4	spearman_r	0.5588	Local-single	Zero Shot	ESM-2
1412	A4_HUMAN_Seuma_2021	320	2	spearman_r	0.412592	Compound-multi	Zero Shot	ESM-2
1413	GFP_AEQVI_Sarkisyan_2016	160	3	spearman_r	0.0547127	Local-single	Zero Shot	ESM-2
1414	PABP_YEAST_Melamed_2013	80	1	spearman_r	0.76422	Local-single	Zero Shot	ESM-2
1415	HIS7_YEAST_Pokusaeva_2019	80	1	spearman_r	0.371696	Compound-multi	Zero Shot	ESM-2
1416	CAPSD_AAV2S_Sinai_substitutions_2021	80	5	spearman_r	0.322654	Local-single	Zero Shot	ESM-2
1417	A4_HUMAN_Seuma_2021	320	2	spearman_r	0.465762	Local-single	Zero Shot	ESM-2
1418	GFP_AEQVI_Sarkisyan_2016	40	1	spearman_r	0.0317407	Local-single	Zero Shot	ESM-2
1419	CAPSD_AAV2S_Sinai_substitutions_2021	20	5	spearman_r	0.172727	Compound-multi	Zero Shot	ESM-2
1420	SPG1_STRSG_Olson_2014	20	4	spearman_r	0.32407	Local-single	Zero Shot	ESM-2
1421	GRB2_HUMAN_Faure_2021	160	5	spearman_r	0.580795	Compound-multi	Zero Shot	ESM-2
1422	GFP_AEQVI_Sarkisyan_2016	160	4	spearman_r	0.134177	Local-single	Zero Shot	ESM-2
1423	HIS7_YEAST_Pokusaeva_2019	80	2	spearman_r	0.18488	Local-single	Zero Shot	ESM-2
1424	SPG1_STRSG_Olson_2014	320	3	spearman_r	0.140109	Compound-multi	Zero Shot	ESM-2
1425	GRB2_HUMAN_Faure_2021	160	4	spearman_r	0.782159	Local-single	Zero Shot	ESM-2
1426	PABP_YEAST_Melamed_2013	20	2	spearman_r	0.460044	Local-single	Zero Shot	ESM-2
1427	YAP1_HUMAN_Araya_2012	40	3	spearman_r	0.319187	Compound-multi	Zero Shot	ESM-2
1428	A4_HUMAN_Seuma_2021	80	3	spearman_r	0.558831	Local-single	Zero Shot	ESM-2
1429	SPG1_STRSG_Olson_2014	160	4	spearman_r	0.309408	Compound-multi	Zero Shot	ESM-2
1430	YAP1_HUMAN_Araya_2012	20	4	spearman_r	0.724658	Local-single	Zero Shot	ESM-2
1431	GFP_AEQVI_Sarkisyan_2016	80	5	spearman_r	0.145899	Compound-multi	Zero Shot	ESM-2
1432	PABP_YEAST_Melamed_2013	160	2	spearman_r	0.47232	Local-single	Zero Shot	ESM-2
1433	CAPSD_AAV2S_Sinai_substitutions_2021	320	4	spearman_r	0.261119	Local-single	Zero Shot	ESM-2
1434	A4_HUMAN_Seuma_2021	80	3	spearman_r	0.63253	Compound-multi	Zero Shot	ESM-2
1435	A4_HUMAN_Seuma_2021	160	3	spearman_r	0.539256	Compound-multi	Zero Shot	ESM-2
1436	F7YBW8_MESOW_Aakre_2015	20	1	spearman_r	0.391453	Local-single	Zero Shot	ESM-2
1437	CAPSD_AAV2S_Sinai_substitutions_2021	160	4	spearman_r	0.0376332	Compound-multi	Zero Shot	ESM-2
1438	YAP1_HUMAN_Araya_2012	20	3	spearman_r	0.406061	Compound-multi	Zero Shot	ESM-2
1439	HIS7_YEAST_Pokusaeva_2019	20	3	spearman_r	0.195935	Local-single	Zero Shot	ESM-2
1440	PABP_YEAST_Melamed_2013	80	2	spearman_r	0.749473	Local-single	Zero Shot	ESM-2
1441	GFP_AEQVI_Sarkisyan_2016	20	5	spearman_r	0.159951	Local-single	Zero Shot	ESM-2
1442	PABP_YEAST_Melamed_2013	20	3	spearman_r	0.665934	Compound-multi	Zero Shot	ESM-2
1443	A4_HUMAN_Seuma_2021	160	3	spearman_r	0.476508	Local-single	Zero Shot	ESM-2
1444	YAP1_HUMAN_Araya_2012	80	4	spearman_r	0.638685	Local-single	Zero Shot	ESM-2
1445	SPG1_STRSG_Olson_2014	80	3	spearman_r	0.016399	Local-single	Zero Shot	ESM-2
1446	GRB2_HUMAN_Faure_2021	160	5	spearman_r	0.760727	Local-single	Zero Shot	ESM-2
1447	PABP_YEAST_Melamed_2013	40	2	spearman_r	0.600515	Compound-multi	Zero Shot	ESM-2
1448	SPG1_STRSG_Olson_2014	160	5	spearman_r	0.281913	Compound-multi	Zero Shot	ESM-2
1449	GRB2_HUMAN_Faure_2021	20	5	spearman_r	0.865193	Local-single	Zero Shot	ESM-2
1450	GFP_AEQVI_Sarkisyan_2016	80	1	spearman_r	0.0825229	Compound-multi	Zero Shot	ESM-2
1451	A4_HUMAN_Seuma_2021	40	5	spearman_r	0.235999	Local-single	Zero Shot	ESM-2
1452	PABP_YEAST_Melamed_2013	320	1	spearman_r	0.643651	Local-single	Zero Shot	ESM-2
1453	PABP_YEAST_Melamed_2013	160	2	spearman_r	0.451029	Compound-multi	Zero Shot	ESM-2
1454	A4_HUMAN_Seuma_2021	80	2	spearman_r	0.268165	Compound-multi	Zero Shot	ESM-2
1455	GFP_AEQVI_Sarkisyan_2016	160	5	spearman_r	0.156261	Compound-multi	Zero Shot	ESM-2
1456	A4_HUMAN_Seuma_2021	80	2	spearman_r	0.215737	Local-single	Zero Shot	ESM-2
1457	GFP_AEQVI_Sarkisyan_2016	20	3	spearman_r	0.0290093	Local-single	Zero Shot	ESM-2
1458	SPG1_STRSG_Olson_2014	80	4	spearman_r	0.408729	Local-single	Zero Shot	ESM-2
1459	CAPSD_AAV2S_Sinai_substitutions_2021	160	5	spearman_r	0.0220529	Local-single	Zero Shot	ESM-2
1460	HIS7_YEAST_Pokusaeva_2019	80	2	spearman_r	0.411688	Compound-multi	Zero Shot	ESM-2
1461	YAP1_HUMAN_Araya_2012	160	3	spearman_r	0.488002	Local-single	Zero Shot	ESM-2
1462	GFP_AEQVI_Sarkisyan_2016	160	4	spearman_r	0.182741	Compound-multi	Zero Shot	ESM-2
1463	YAP1_HUMAN_Araya_2012	40	3	spearman_r	0.54371	Local-single	Zero Shot	ESM-2
1464	GFP_AEQVI_Sarkisyan_2016	80	5	spearman_r	0.0967597	Local-single	Zero Shot	ESM-2
1465	SPG1_STRSG_Olson_2014	160	3	spearman_r	0.510166	Compound-multi	Zero Shot	ESM-2
1466	GFP_AEQVI_Sarkisyan_2016	320	2	spearman_r	0.0534476	Local-single	Zero Shot	ESM-2
1467	SPG1_STRSG_Olson_2014	40	4	spearman_r	0.172767	Compound-multi	Zero Shot	ESM-2
1468	A4_HUMAN_Seuma_2021	160	2	spearman_r	0.326014	Compound-multi	Zero Shot	ESM-2
1469	HIS7_YEAST_Pokusaeva_2019	20	2	spearman_r	0.282456	Compound-multi	Zero Shot	ESM-2
1470	PABP_YEAST_Melamed_2013	20	2	spearman_r	0.282353	Compound-multi	Zero Shot	ESM-2
1471	GRB2_HUMAN_Faure_2021	40	4	spearman_r	0.696072	Local-single	Zero Shot	ESM-2
1472	HIS7_YEAST_Pokusaeva_2019	40	2	spearman_r	0.297216	Compound-multi	Zero Shot	ESM-2
1473	GCN4_YEAST_Staller_induction_2018	20	1	spearman_r	0.484416	Local-single	Zero Shot	ESM-2
1474	CAPSD_AAV2S_Sinai_substitutions_2021	40	5	spearman_r	0.228107	Local-single	Zero Shot	ESM-2
1475	PABP_YEAST_Melamed_2013	320	2	spearman_r	0.64183	Local-single	Zero Shot	ESM-2
1476	YAP1_HUMAN_Araya_2012	80	4	spearman_r	0.424858	Compound-multi	Zero Shot	ESM-2
1477	GRB2_HUMAN_Faure_2021	320	4	spearman_r	0.69909	Compound-multi	Zero Shot	ESM-2
1478	A4_HUMAN_Seuma_2021	160	5	spearman_r	0.495381	Compound-multi	Zero Shot	ESM-2
1479	GFP_AEQVI_Sarkisyan_2016	40	3	spearman_r	0.254545	Compound-multi	Zero Shot	ESM-2
1480	CAPSD_AAV2S_Sinai_substitutions_2021	160	4	spearman_r	0.141517	Local-single	Zero Shot	ESM-2
1481	GFP_AEQVI_Sarkisyan_2016	20	3	spearman_r	0.190909	Compound-multi	Zero Shot	ESM-2
1482	HIS7_YEAST_Pokusaeva_2019	20	4	spearman_r	0.250141	Local-single	Zero Shot	ESM-2
1483	YAP1_HUMAN_Araya_2012	160	1	spearman_r	0.594976	Local-single	Zero Shot	ESM-2
1484	A4_HUMAN_Seuma_2021	320	5	spearman_r	0.520861	Local-single	Zero Shot	ESM-2
1485	PABP_YEAST_Melamed_2013	40	5	spearman_r	0.324303	Compound-multi	Zero Shot	ESM-2
1486	DLG4_HUMAN_Faure_2021	160	2	spearman_r	0.50515	Compound-multi	Zero Shot	ESM-2
1487	SPG1_STRSG_Olson_2014	20	2	spearman_r	0.382586	Compound-multi	Zero Shot	ESM-2
1488	DLG4_HUMAN_Faure_2021	320	4	spearman_r	0.543394	Local-single	Zero Shot	ESM-2
1489	GRB2_HUMAN_Faure_2021	320	1	spearman_r	0.695564	Local-single	Zero Shot	ESM-2
1490	GRB2_HUMAN_Faure_2021	20	3	spearman_r	0.567179	Compound-multi	Zero Shot	ESM-2
1491	SPG1_STRSG_Olson_2014	20	5	spearman_r	0.0286771	Compound-multi	Zero Shot	ESM-2
1492	CAPSD_AAV2S_Sinai_substitutions_2021	40	2	spearman_r	0.105279	Compound-multi	Zero Shot	ESM-2
1493	PABP_YEAST_Melamed_2013	40	5	spearman_r	0.55437	Local-single	Zero Shot	ESM-2
1494	GRB2_HUMAN_Faure_2021	80	5	spearman_r	0.34315	Compound-multi	Zero Shot	ESM-2
1495	DLG4_HUMAN_Faure_2021	160	2	spearman_r	0.64126	Local-single	Zero Shot	ESM-2
1496	DLG4_HUMAN_Faure_2021	320	4	spearman_r	0.308283	Compound-multi	Zero Shot	ESM-2
1497	HIS7_YEAST_Pokusaeva_2019	80	5	spearman_r	0.64485	Compound-multi	Zero Shot	ESM-2
1498	YAP1_HUMAN_Araya_2012	40	1	spearman_r	0.650952	Compound-multi	Zero Shot	ESM-2
1499	CAPSD_AAV2S_Sinai_substitutions_2021	20	2	spearman_r	0.162053	Local-single	Zero Shot	ESM-2
1500	GFP_AEQVI_Sarkisyan_2016	40	3	spearman_r	0.148611	Local-single	Zero Shot	ESM-2
1501	DLG4_HUMAN_Faure_2021	320	2	spearman_r	0.243365	Compound-multi	Zero Shot	ESM-2
1502	PABP_YEAST_Melamed_2013	80	5	spearman_r	0.49337	Compound-multi	Zero Shot	ESM-2
1503	SPG1_STRSG_Olson_2014	320	1	spearman_r	0.303177	Local-single	Zero Shot	ESM-2
1504	DLG4_HUMAN_Faure_2021	160	4	spearman_r	0.610671	Local-single	Zero Shot	ESM-2
1505	GRB2_HUMAN_Faure_2021	320	2	spearman_r	0.658747	Local-single	Zero Shot	ESM-2
1506	GRB2_HUMAN_Faure_2021	20	2	spearman_r	0.675824	Compound-multi	Zero Shot	ESM-2
1507	CAPSD_AAV2S_Sinai_substitutions_2021	20	2	spearman_r	0.648485	Compound-multi	Zero Shot	ESM-2
1508	A4_HUMAN_Seuma_2021	160	4	spearman_r	0.285561	Compound-multi	Zero Shot	ESM-2
1509	GFP_AEQVI_Sarkisyan_2016	40	2	spearman_r	0.134884	Local-single	Zero Shot	ESM-2
1510	DLG4_HUMAN_Faure_2021	320	2	spearman_r	0.455572	Local-single	Zero Shot	ESM-2
1511	HIS7_YEAST_Pokusaeva_2019	80	5	spearman_r	0.102962	Local-single	Zero Shot	ESM-2
1512	SPG1_STRSG_Olson_2014	320	5	spearman_r	0.237916	Local-single	Zero Shot	ESM-2
1513	F7YBW8_MESOW_Aakre_2015	20	4	spearman_r	0.405385	Local-single	Zero Shot	ESM-2
1514	HIS7_YEAST_Pokusaeva_2019	40	5	spearman_r	0.073274	Local-single	Zero Shot	ESM-2
1515	CAPSD_AAV2S_Sinai_substitutions_2021	40	2	spearman_r	0.641366	Local-single	Zero Shot	ESM-2
1516	DLG4_HUMAN_Faure_2021	20	5	spearman_r	0.598901	Compound-multi	Zero Shot	ESM-2
1517	CAPSD_AAV2S_Sinai_substitutions_2021	160	2	spearman_r	0.138464	Compound-multi	Zero Shot	ESM-2
1518	GRB2_HUMAN_Faure_2021	40	3	spearman_r	0.188811	Compound-multi	Zero Shot	ESM-2
1519	PABP_YEAST_Melamed_2013	80	3	spearman_r	0.56444	Local-single	Zero Shot	ESM-2
1520	HIS7_YEAST_Pokusaeva_2019	20	5	spearman_r	0.257143	Local-single	Zero Shot	ESM-2
1521	DLG4_HUMAN_Faure_2021	40	5	spearman_r	0.714204	Local-single	Zero Shot	ESM-2
1522	DLG4_HUMAN_Faure_2021	40	2	spearman_r	0.832967	Compound-multi	Zero Shot	ESM-2
1523	GRB2_HUMAN_Faure_2021	160	1	spearman_r	0.667068	Local-single	Zero Shot	ESM-2
1524	YAP1_HUMAN_Araya_2012	40	1	spearman_r	0.432194	Local-single	Zero Shot	ESM-2
1525	SPG1_STRSG_Olson_2014	40	2	spearman_r	0.179858	Compound-multi	Zero Shot	ESM-2
1526	PABP_YEAST_Melamed_2013	320	4	spearman_r	0.69517	Local-single	Zero Shot	ESM-2
1527	GFP_AEQVI_Sarkisyan_2016	20	4	spearman_r	0.115152	Compound-multi	Zero Shot	ESM-2
1528	DLG4_HUMAN_Faure_2021	40	2	spearman_r	0.262187	Local-single	Zero Shot	ESM-2
1529	CAPSD_AAV2S_Sinai_substitutions_2021	80	2	spearman_r	0.0318949	Local-single	Zero Shot	ESM-2
1530	DLG4_HUMAN_Faure_2021	40	5	spearman_r	0.391608	Compound-multi	Zero Shot	ESM-2
1531	DLG4_HUMAN_Faure_2021	160	4	spearman_r	0.0471873	Compound-multi	Zero Shot	ESM-2
1532	A4_HUMAN_Seuma_2021	320	4	spearman_r	0.430092	Local-single	Zero Shot	ESM-2
1533	HIS7_YEAST_Pokusaeva_2019	40	5	spearman_r	0.049718	Compound-multi	Zero Shot	ESM-2
1534	GFP_AEQVI_Sarkisyan_2016	40	4	spearman_r	0.441374	Local-single	Zero Shot	ESM-2
1535	GFP_AEQVI_Sarkisyan_2016	80	2	spearman_r	0.151154	Compound-multi	Zero Shot	ESM-2
1536	DLG4_HUMAN_Faure_2021	80	2	spearman_r	0.235628	Compound-multi	Zero Shot	ESM-2
1537	GRB2_HUMAN_Faure_2021	20	3	spearman_r	0.619214	Local-single	Zero Shot	ESM-2
1538	CAPSD_AAV2S_Sinai_substitutions_2021	80	2	spearman_r	0.144171	Compound-multi	Zero Shot	ESM-2
1539	DLG4_HUMAN_Faure_2021	20	5	spearman_r	0.343583	Local-single	Zero Shot	ESM-2
1540	GRB2_HUMAN_Faure_2021	320	1	spearman_r	0.671028	Compound-multi	Zero Shot	ESM-2
1541	SPG1_STRSG_Olson_2014	20	2	spearman_r	0.333844	Local-single	Zero Shot	ESM-2
1542	PABP_YEAST_Melamed_2013	20	5	spearman_r	0.121334	Local-single	Zero Shot	ESM-2
1543	SPG1_STRSG_Olson_2014	40	5	spearman_r	0.149922	Local-single	Zero Shot	ESM-2
1544	PABP_YEAST_Melamed_2013	40	1	spearman_r	0.233002	Compound-multi	Zero Shot	ESM-2
1545	GFP_AEQVI_Sarkisyan_2016	320	1	spearman_r	0.0603291	Local-single	Zero Shot	ESM-2
1546	DLG4_HUMAN_Faure_2021	80	2	spearman_r	0.311602	Local-single	Zero Shot	ESM-2
1547	PABP_YEAST_Melamed_2013	20	5	spearman_r	0.665635	Compound-multi	Zero Shot	ESM-2
1548	HIS7_YEAST_Pokusaeva_2019	20	1	spearman_r	0.590909	Compound-multi	Zero Shot	ESM-2
1549	PABP_YEAST_Melamed_2013	80	5	spearman_r	0.618245	Local-single	Zero Shot	ESM-2
1550	GFP_AEQVI_Sarkisyan_2016	20	2	spearman_r	0.0666667	Compound-multi	Zero Shot	ESM-2
1551	DLG4_HUMAN_Faure_2021	80	3	spearman_r	0.234796	Compound-multi	Zero Shot	ESM-2
1552	SPG1_STRSG_Olson_2014	20	5	spearman_r	0.410658	Local-single	Zero Shot	ESM-2
1553	F7YBW8_MESOW_Aakre_2015	20	5	spearman_r	0.121542	Local-single	Zero Shot	ESM-2
1554	DLG4_HUMAN_Faure_2021	20	4	spearman_r	0.242981	Local-single	Zero Shot	ESM-2
1555	CAPSD_AAV2S_Sinai_substitutions_2021	80	1	spearman_r	0.0512059	Local-single	Zero Shot	ESM-2
1556	SPG1_STRSG_Olson_2014	40	1	spearman_r	0.0940948	Compound-multi	Zero Shot	ESM-2
1557	GRB2_HUMAN_Faure_2021	160	2	spearman_r	0.565703	Compound-multi	Zero Shot	ESM-2
1558	GRB2_HUMAN_Faure_2021	40	2	spearman_r	0.803623	Local-single	Zero Shot	ESM-2
1559	PABP_YEAST_Melamed_2013	20	1	spearman_r	0.578022	Compound-multi	Zero Shot	ESM-2
1560	DLG4_HUMAN_Faure_2021	80	3	spearman_r	0.490686	Local-single	Zero Shot	ESM-2
1561	SPG1_STRSG_Olson_2014	80	1	spearman_r	0.310628	Local-single	Zero Shot	ESM-2
1562	CAPSD_AAV2S_Sinai_substitutions_2021	20	1	spearman_r	0.0181818	Compound-multi	Zero Shot	ESM-2
1563	GFP_AEQVI_Sarkisyan_2016	20	2	spearman_r	0.018315	Local-single	Zero Shot	ESM-2
1564	DLG4_HUMAN_Faure_2021	20	4	spearman_r	0.692308	Compound-multi	Zero Shot	ESM-2
1565	PABP_YEAST_Melamed_2013	320	5	spearman_r	0.633439	Local-single	Zero Shot	ESM-2
1566	CAPSD_AAV2S_Sinai_substitutions_2021	80	1	spearman_r	0.296835	Compound-multi	Zero Shot	ESM-2
1567	DLG4_HUMAN_Faure_2021	160	3	spearman_r	0.525577	Compound-multi	Zero Shot	ESM-2
1568	GFP_AEQVI_Sarkisyan_2016	80	3	spearman_r	0.130068	Local-single	Zero Shot	ESM-2
1569	GCN4_YEAST_Staller_induction_2018	20	4	spearman_r	0.484416	Local-single	Zero Shot	ESM-2
1570	CAPSD_AAV2S_Sinai_substitutions_2021	20	1	spearman_r	0.446985	Local-single	Zero Shot	ESM-2
1571	YAP1_HUMAN_Araya_2012	20	1	spearman_r	0.591209	Compound-multi	Zero Shot	ESM-2
1572	GRB2_HUMAN_Faure_2021	80	2	spearman_r	0.549225	Compound-multi	Zero Shot	ESM-2
1573	DLG4_HUMAN_Faure_2021	320	3	spearman_r	0.565809	Local-single	Zero Shot	ESM-2
1574	CAPSD_AAV2S_Sinai_substitutions_2021	40	1	spearman_r	0.200739	Local-single	Zero Shot	ESM-2
1575	SPG1_STRSG_Olson_2014	40	1	spearman_r	0.1892	Local-single	Zero Shot	ESM-2
1576	GRB2_HUMAN_Faure_2021	80	2	spearman_r	0.652328	Local-single	Zero Shot	ESM-2
1577	DLG4_HUMAN_Faure_2021	160	3	spearman_r	0.538144	Local-single	Zero Shot	ESM-2
1578	SPG1_STRSG_Olson_2014	80	1	spearman_r	0.314261	Compound-multi	Zero Shot	ESM-2
1579	A4_HUMAN_Seuma_2021	160	4	spearman_r	0.358055	Local-single	Zero Shot	ESM-2
1580	CAPSD_AAV2S_Sinai_substitutions_2021	40	1	spearman_r	0.228261	Compound-multi	Zero Shot	ESM-2
1581	GFP_AEQVI_Sarkisyan_2016	40	2	spearman_r	0.254783	Compound-multi	Zero Shot	ESM-2
1582	GCN4_YEAST_Staller_induction_2018	20	2	spearman_r	0.484416	Local-single	Zero Shot	ESM-2
1583	GRB2_HUMAN_Faure_2021	40	5	spearman_r	0.83705	Local-single	Zero Shot	ESM-2
1584	DLG4_HUMAN_Faure_2021	40	4	spearman_r	0.178922	Compound-multi	Zero Shot	ESM-2
1585	CAPSD_AAV2S_Sinai_substitutions_2021	320	1	spearman_r	0.19341	Local-single	Zero Shot	ESM-2
1586	SPG1_STRSG_Olson_2014	320	1	spearman_r	0.313863	Compound-multi	Zero Shot	ESM-2
1587	F7YBW8_MESOW_Aakre_2015	20	5	spearman_r	0.458998	Compound-multi	Zero Shot	ESM-2
1588	DLG4_HUMAN_Faure_2021	20	3	spearman_r	0.56044	Compound-multi	Zero Shot	ESM-2
1589	GRB2_HUMAN_Faure_2021	320	2	spearman_r	0.542904	Compound-multi	Zero Shot	ESM-2
1590	DLG4_HUMAN_Faure_2021	80	4	spearman_r	0.334923	Local-single	Zero Shot	ESM-2
1591	GRB2_HUMAN_Faure_2021	20	2	spearman_r	0.387241	Local-single	Zero Shot	ESM-2
1592	PABP_YEAST_Melamed_2013	160	5	spearman_r	0.759504	Compound-multi	Zero Shot	ESM-2
1593	CAPSD_AAV2S_Sinai_substitutions_2021	320	1	spearman_r	0.0244557	Compound-multi	Zero Shot	ESM-2
1594	DLG4_HUMAN_Faure_2021	20	3	spearman_r	0.309018	Local-single	Zero Shot	ESM-2
1595	A4_HUMAN_Seuma_2021	320	4	spearman_r	0.389249	Compound-multi	Zero Shot	ESM-2
1596	SPG1_STRSG_Olson_2014	20	1	spearman_r	0.0936652	Compound-multi	Zero Shot	ESM-2
1597	YAP1_HUMAN_Araya_2012	20	1	spearman_r	0.17522	Local-single	Zero Shot	ESM-2
1598	SPG1_STRSG_Olson_2014	160	1	spearman_r	0.367156	Local-single	Zero Shot	ESM-2
1599	SPG1_STRSG_Olson_2014	40	5	spearman_r	0.0408754	Compound-multi	Zero Shot	ESM-2
1600	DLG4_HUMAN_Faure_2021	80	4	spearman_r	0.231527	Compound-multi	Zero Shot	ESM-2
1601	CAPSD_AAV2S_Sinai_substitutions_2021	160	1	spearman_r	0.02523	Local-single	Zero Shot	ESM-2
1602	PABP_YEAST_Melamed_2013	160	5	spearman_r	0.734574	Local-single	Zero Shot	ESM-2
1603	GFP_AEQVI_Sarkisyan_2016	20	4	spearman_r	0.228243	Local-single	Zero Shot	ESM-2
1604	PABP_YEAST_Melamed_2013	20	1	spearman_r	0.765762	Local-single	Zero Shot	ESM-2
1605	HIS7_YEAST_Pokusaeva_2019	20	1	spearman_r	0.0254094	Local-single	Zero Shot	ESM-2
1606	GRB2_HUMAN_Faure_2021	40	2	spearman_r	0.675862	Compound-multi	Zero Shot	ESM-2
1607	DLG4_HUMAN_Faure_2021	40	4	spearman_r	0.536908	Local-single	Zero Shot	ESM-2
1608	GRB2_HUMAN_Faure_2021	160	2	spearman_r	0.675161	Local-single	Zero Shot	ESM-2
1609	DLG4_HUMAN_Faure_2021	40	3	spearman_r	0.444611	Local-single	Zero Shot	ESM-2
1610	SPG1_STRSG_Olson_2014	20	1	spearman_r	0.303425	Local-single	Zero Shot	ESM-2
1611	PABP_YEAST_Melamed_2013	320	5	spearman_r	0.627517	Compound-multi	Zero Shot	ESM-2
1612	GFP_AEQVI_Sarkisyan_2016	40	4	spearman_r	0.224308	Compound-multi	Zero Shot	ESM-2
1613	CAPSD_AAV2S_Sinai_substitutions_2021	160	1	spearman_r	0.0731438	Compound-multi	Zero Shot	ESM-2
1614	SPG1_STRSG_Olson_2014	160	1	spearman_r	0.401186	Compound-multi	Zero Shot	ESM-2
1615	DLG4_HUMAN_Faure_2021	40	3	spearman_r	0.0411765	Compound-multi	Zero Shot	ESM-2
1616	DLG4_HUMAN_Faure_2021	20	2	spearman_r	0.578812	Local-single	Zero Shot	ESM-2
1617	GRB2_HUMAN_Faure_2021	20	5	spearman_r	0.218182	Compound-multi	Zero Shot	ESM-2
1618	DLG4_HUMAN_Faure_2021	80	5	spearman_r	0.517234	Compound-multi	Zero Shot	ESM-2
1619	DLG4_HUMAN_Faure_2021	20	1	spearman_r	0.214286	Compound-multi	Zero Shot	ESM-2
1620	DLG4_HUMAN_Faure_2021	320	3	spearman_r	0.392101	Compound-multi	Zero Shot	ESM-2
1621	SPG1_STRSG_Olson_2014	320	2	spearman_r	0.289141	Local-single	Zero Shot	ESM-2
1622	A4_HUMAN_Seuma_2021	80	1	spearman_r	0.327373	Compound-multi	Zero Shot	ESM-2
1623	SPG1_STRSG_Olson_2014	320	4	spearman_r	0.396845	Compound-multi	Zero Shot	ESM-2
1624	CAPSD_AAV2S_Sinai_substitutions_2021	160	3	spearman_r	0.191761	Compound-multi	Zero Shot	ESM-2
1625	PABP_YEAST_Melamed_2013	40	1	spearman_r	0.721785	Local-single	Zero Shot	ESM-2
1626	GRB2_HUMAN_Faure_2021	80	5	spearman_r	0.769493	Local-single	Zero Shot	ESM-2
1627	GRB2_HUMAN_Faure_2021	160	3	spearman_r	0.695978	Local-single	Zero Shot	ESM-2
1628	F7YBW8_MESOW_Aakre_2015	20	3	spearman_r	0.465034	Compound-multi	Zero Shot	ESM-2
1629	PABP_YEAST_Melamed_2013	20	4	spearman_r	0.718182	Compound-multi	Zero Shot	ESM-2
1630	DLG4_HUMAN_Faure_2021	20	1	spearman_r	0.708403	Local-single	Zero Shot	ESM-2
1631	A4_HUMAN_Seuma_2021	40	1	spearman_r	0.322944	Local-single	Zero Shot	ESM-2
1632	CAPSD_AAV2S_Sinai_substitutions_2021	80	3	spearman_r	0.235414	Local-single	Zero Shot	ESM-2
1633	A4_HUMAN_Seuma_2021	80	4	spearman_r	0.219048	Compound-multi	Zero Shot	ESM-2
1634	GRB2_HUMAN_Faure_2021	40	1	spearman_r	0.463736	Compound-multi	Zero Shot	ESM-2
1635	SPG1_STRSG_Olson_2014	320	2	spearman_r	0.306138	Compound-multi	Zero Shot	ESM-2
1636	GFP_AEQVI_Sarkisyan_2016	320	3	spearman_r	0.0300235	Local-single	Zero Shot	ESM-2
1637	HIS7_YEAST_Pokusaeva_2019	40	4	spearman_r	0.301299	Compound-multi	Zero Shot	ESM-2
1638	DLG4_HUMAN_Faure_2021	40	1	spearman_r	0.549194	Compound-multi	Zero Shot	ESM-2
1639	A4_HUMAN_Seuma_2021	40	1	spearman_r	0.3751	Compound-multi	Zero Shot	ESM-2
1640	PABP_YEAST_Melamed_2013	20	4	spearman_r	0.244501	Local-single	Zero Shot	ESM-2
1641	CAPSD_AAV2S_Sinai_substitutions_2021	80	3	spearman_r	0.261364	Compound-multi	Zero Shot	ESM-2
1642	GRB2_HUMAN_Faure_2021	160	3	spearman_r	0.684628	Compound-multi	Zero Shot	ESM-2
1643	GFP_AEQVI_Sarkisyan_2016	160	2	spearman_r	0.118421	Compound-multi	Zero Shot	ESM-2
1644	SPG1_STRSG_Olson_2014	40	2	spearman_r	0.07895	Local-single	Zero Shot	ESM-2
1645	A4_HUMAN_Seuma_2021	20	1	spearman_r	0.283525	Local-single	Zero Shot	ESM-2
1646	CAPSD_AAV2S_Sinai_substitutions_2021	40	3	spearman_r	0.43836	Local-single	Zero Shot	ESM-2
1647	PABP_YEAST_Melamed_2013	40	4	spearman_r	0.700272	Compound-multi	Zero Shot	ESM-2
1648	GRB2_HUMAN_Faure_2021	20	1	spearman_r	0.854032	Local-single	Zero Shot	ESM-2
1649	PABP_YEAST_Melamed_2013	320	3	spearman_r	0.608053	Local-single	Zero Shot	ESM-2
1650	YAP1_HUMAN_Araya_2012	160	1	spearman_r	0.413668	Compound-multi	Zero Shot	ESM-2
1651	A4_HUMAN_Seuma_2021	80	1	spearman_r	0.445516	Local-single	Zero Shot	ESM-2
1652	GFP_AEQVI_Sarkisyan_2016	320	5	spearman_r	0.170198	Local-single	Zero Shot	ESM-2
1653	CAPSD_AAV2S_Sinai_substitutions_2021	20	4	spearman_r	0.247059	Compound-multi	Zero Shot	ESM-2
1654	PABP_YEAST_Melamed_2013	80	1	spearman_r	0.543751	Compound-multi	Zero Shot	ESM-2
1655	YAP1_HUMAN_Araya_2012	80	5	spearman_r	0.51196	Compound-multi	Zero Shot	ESM-2
1656	A4_HUMAN_Seuma_2021	320	1	spearman_r	0.408103	Compound-multi	Zero Shot	ESM-2
1657	GFP_AEQVI_Sarkisyan_2016	80	4	spearman_r	0.176411	Local-single	Zero Shot	ESM-2
1658	SPG1_STRSG_Olson_2014	20	3	spearman_r	0.380895	Local-single	Zero Shot	ESM-2
1659	HIS7_YEAST_Pokusaeva_2019	80	3	spearman_r	0.243311	Local-single	Zero Shot	ESM-2
1660	PABP_YEAST_Melamed_2013	160	3	spearman_r	0.705298	Compound-multi	Zero Shot	ESM-2
1661	A4_HUMAN_Seuma_2021	160	5	spearman_r	0.548661	Local-single	Zero Shot	ESM-2
1662	GRB2_HUMAN_Faure_2021	320	3	spearman_r	0.629144	Local-single	Zero Shot	ESM-2
1663	F7YBW8_MESOW_Aakre_2015	20	2	spearman_r	0.405385	Local-single	Zero Shot	ESM-2
1664	YAP1_HUMAN_Araya_2012	80	5	spearman_r	0.466174	Local-single	Zero Shot	ESM-2
1665	CAPSD_AAV2S_Sinai_substitutions_2021	320	3	spearman_r	0.22839	Local-single	Zero Shot	ESM-2
1666	SPG1_STRSG_Olson_2014	160	2	spearman_r	0.158256	Local-single	Zero Shot	ESM-2
1667	A4_HUMAN_Seuma_2021	160	1	spearman_r	0.410631	Local-single	Zero Shot	ESM-2
1668	PABP_YEAST_Melamed_2013	160	3	spearman_r	0.760827	Local-single	Zero Shot	ESM-2
1669	GRB2_HUMAN_Faure_2021	20	1	spearman_r	0.164935	Compound-multi	Zero Shot	ESM-2
1670	SPG1_STRSG_Olson_2014	80	5	spearman_r	0.376567	Local-single	Zero Shot	ESM-2
1671	YAP1_HUMAN_Araya_2012	160	5	spearman_r	0.441834	Compound-multi	Zero Shot	ESM-2
1672	SPG1_STRSG_Olson_2014	20	3	spearman_r	0.194568	Compound-multi	Zero Shot	ESM-2
1673	CAPSD_AAV2S_Sinai_substitutions_2021	320	3	spearman_r	0.0418091	Compound-multi	Zero Shot	ESM-2
1674	A4_HUMAN_Seuma_2021	160	1	spearman_r	0.397277	Compound-multi	Zero Shot	ESM-2
1675	HIS7_YEAST_Pokusaeva_2019	20	4	spearman_r	0.25266	Compound-multi	Zero Shot	ESM-2
1676	GFP_AEQVI_Sarkisyan_2016	160	1	spearman_r	0.0495793	Compound-multi	Zero Shot	ESM-2
1677	GRB2_HUMAN_Faure_2021	320	3	spearman_r	0.587786	Compound-multi	Zero Shot	ESM-2
1678	PABP_YEAST_Melamed_2013	320	3	spearman_r	0.631547	Compound-multi	Zero Shot	ESM-2
1679	GFP_AEQVI_Sarkisyan_2016	160	2	spearman_r	0.0579269	Local-single	Zero Shot	ESM-2
1680	YAP1_HUMAN_Araya_2012	160	5	spearman_r	0.55319	Local-single	Zero Shot	ESM-2
1681	CAPSD_AAV2S_Sinai_substitutions_2021	160	3	spearman_r	0.26443	Local-single	Zero Shot	ESM-2
1682	A4_HUMAN_Seuma_2021	20	5	spearman_r	0.40084	Local-single	Zero Shot	ESM-2
1683	HIS7_YEAST_Pokusaeva_2019	40	4	spearman_r	0.264271	Local-single	Zero Shot	ESM-2
1684	DLG4_HUMAN_Faure_2021	40	1	spearman_r	0.590882	Local-single	Zero Shot	ESM-2
1685	GRB2_HUMAN_Faure_2021	40	1	spearman_r	0.654071	Local-single	Zero Shot	ESM-2
1686	DLG4_HUMAN_Faure_2021	160	1	spearman_r	0.452138	Local-single	Zero Shot	ESM-2
1687	A4_HUMAN_Seuma_2021	80	4	spearman_r	0.204753	Local-single	Zero Shot	ESM-2
1688	PABP_YEAST_Melamed_2013	80	4	spearman_r	0.563937	Local-single	Zero Shot	ESM-2
1689	SPG1_STRSG_Olson_2014	80	2	spearman_r	0.357756	Local-single	Zero Shot	ESM-2
1690	GRB2_HUMAN_Faure_2021	80	3	spearman_r	0.707897	Compound-multi	Zero Shot	ESM-2
1691	CAPSD_AAV2S_Sinai_substitutions_2021	20	3	spearman_r	0.643956	Compound-multi	Zero Shot	ESM-2
1692	GRB2_HUMAN_Faure_2021	160	1	spearman_r	0.487094	Compound-multi	Zero Shot	ESM-2
1693	DLG4_HUMAN_Faure_2021	80	1	spearman_r	0.375035	Compound-multi	Zero Shot	ESM-2
1694	DLG4_HUMAN_Faure_2021	20	2	spearman_r	0.154545	Compound-multi	Zero Shot	ESM-2
1695	DLG4_HUMAN_Faure_2021	80	5	spearman_r	0.572963	Local-single	Zero Shot	ESM-2
1696	DLG4_HUMAN_Faure_2021	160	5	spearman_r	0.536472	Local-single	Zero Shot	ESM-2
1697	HIS7_YEAST_Pokusaeva_2019	80	4	spearman_r	0.101417	Local-single	Zero Shot	ESM-2
1698	SPG1_STRSG_Olson_2014	320	4	spearman_r	0.416876	Local-single	Zero Shot	ESM-2
1699	HIS7_YEAST_Pokusaeva_2019	20	5	spearman_r	0.60966	Compound-multi	Zero Shot	ESM-2
1700	CAPSD_AAV2S_Sinai_substitutions_2021	320	2	spearman_r	0.0205665	Compound-multi	Zero Shot	ESM-2
1701	DLG4_HUMAN_Faure_2021	320	1	spearman_r	0.396959	Compound-multi	Zero Shot	ESM-2
1702	GRB2_HUMAN_Faure_2021	80	1	spearman_r	0.736293	Local-single	Zero Shot	ESM-2
1703	CAPSD_AAV2S_Sinai_substitutions_2021	320	2	spearman_r	0.153434	Local-single	Zero Shot	ESM-2
1704	PABP_YEAST_Melamed_2013	160	4	spearman_r	0.805601	Compound-multi	Zero Shot	ESM-2
1705	HIS7_YEAST_Pokusaeva_2019	40	1	spearman_r	0.613287	Compound-multi	Zero Shot	ESM-2
1706	YAP1_HUMAN_Araya_2012	80	1	spearman_r	0.525549	Compound-multi	Zero Shot	ESM-2
1707	DLG4_HUMAN_Faure_2021	160	5	spearman_r	0.407852	Compound-multi	Zero Shot	ESM-2
1708	PABP_YEAST_Melamed_2013	160	4	spearman_r	0.736206	Local-single	Zero Shot	ESM-2
1709	GFP_AEQVI_Sarkisyan_2016	80	2	spearman_r	0.134053	Local-single	Zero Shot	ESM-2
1710	DLG4_HUMAN_Faure_2021	320	1	spearman_r	0.555513	Local-single	Zero Shot	ESM-2
1711	GRB2_HUMAN_Faure_2021	40	3	spearman_r	0.745933	Local-single	Zero Shot	ESM-2
1712	DLG4_HUMAN_Faure_2021	320	5	spearman_r	0.661407	Compound-multi	Zero Shot	ESM-2
1713	A4_HUMAN_Seuma_2021	320	5	spearman_r	0.491128	Compound-multi	Zero Shot	ESM-2
1714	CAPSD_AAV2S_Sinai_substitutions_2021	20	3	spearman_r	0.339753	Local-single	Zero Shot	ESM-2
1715	YAP1_HUMAN_Araya_2012	80	1	spearman_r	0.632568	Local-single	Zero Shot	ESM-2
1716	GRB2_HUMAN_Faure_2021	320	5	spearman_r	0.719437	Local-single	Zero Shot	ESM-2
1717	A4_HUMAN_Seuma_2021	20	1	spearman_r	0.349451	Compound-multi	Zero Shot	ESM-2
1718	CAPSD_AAV2S_Sinai_substitutions_2021	40	3	spearman_r	0.322428	Compound-multi	Zero Shot	ESM-2
1719	GFP_AEQVI_Sarkisyan_2016	160	1	spearman_r	0.0279159	Local-single	Zero Shot	ESM-2
1720	PABP_YEAST_Melamed_2013	40	4	spearman_r	0.674184	Local-single	Zero Shot	ESM-2
1721	DLG4_HUMAN_Faure_2021	80	1	spearman_r	0.39758	Local-single	Zero Shot	ESM-2
1722	GRB2_HUMAN_Faure_2021	80	3	spearman_r	0.592831	Local-single	Zero Shot	ESM-2
1723	A4_HUMAN_Seuma_2021	20	5	spearman_r	0.161404	Compound-multi	Zero Shot	ESM-2
1724	SPG1_STRSG_Olson_2014	160	2	spearman_r	0.264984	Compound-multi	Zero Shot	ESM-2
1725	SPG1_STRSG_Olson_2014	80	5	spearman_r	0.335082	Compound-multi	Zero Shot	ESM-2
1726	PABP_YEAST_Melamed_2013	320	4	spearman_r	0.77661	Compound-multi	Zero Shot	ESM-2
1727	GCN4_YEAST_Staller_induction_2018	20	3	spearman_r	0.484416	Local-single	Zero Shot	ESM-2
1728	DLG4_HUMAN_Faure_2021	320	5	spearman_r	0.516831	Local-single	Zero Shot	ESM-2
1729	HIS7_YEAST_Pokusaeva_2019	80	4	spearman_r	0.336063	Compound-multi	Zero Shot	ESM-2
1730	CAPSD_AAV2S_Sinai_substitutions_2021	160	2	spearman_r	0.00824702	Local-single	Zero Shot	ESM-2
1731	GRB2_HUMAN_Faure_2021	80	1	spearman_r	0.501329	Compound-multi	Zero Shot	ESM-2
1732	PABP_YEAST_Melamed_2013	80	4	spearman_r	0.559117	Compound-multi	Zero Shot	ESM-2
1733	GFP_AEQVI_Sarkisyan_2016	320	1	spearman_r	0.150677	Compound-multi	Zero Shot	ESM-2
1734	DLG4_HUMAN_Faure_2021	160	1	spearman_r	0.435245	Compound-multi	Zero Shot	ESM-2
1735	F7YBW8_MESOW_Aakre_2015	20	3	spearman_r	0.405385	Local-single	Zero Shot	ESM-2
1736	GRB2_HUMAN_Faure_2021	40	5	spearman_r	0.252252	Compound-multi	Zero Shot	ESM-2
1737	F7YBW8_MESOW_Aakre_2015	20	4	spearman_r	0.507097	Compound-multi	Zero Shot	ESM-2
1738	GFP_AEQVI_Sarkisyan_2016	80	4	spearman_r	0.109916	Compound-multi	Zero Shot	ESM-2
1739	SPG1_STRSG_Olson_2014	80	2	spearman_r	0.335589	Compound-multi	Zero Shot	ESM-2
1740	PABP_YEAST_Melamed_2013	20	1	spearman_r	0.132013	Compound-multi	Supervised	LR
1741	A4_HUMAN_Seuma_2021	320	5	spearman_r	0.517868	Compound-multi	Supervised	LR
1742	A4_HUMAN_Seuma_2021	80	5	spearman_r	0.737032	Local-single	Supervised	LR
1743	GFP_AEQVI_Sarkisyan_2016	40	3	spearman_r	0.172727	Compound-multi	Supervised	LR
1744	GRB2_HUMAN_Faure_2021	80	5	spearman_r	0.793684	Local-single	Supervised	LR
1745	GRB2_HUMAN_Faure_2021	80	5	spearman_r	0.384493	Compound-multi	Supervised	LR
1746	PABP_YEAST_Melamed_2013	80	1	spearman_r	0.617656	Compound-multi	Supervised	LR
1747	A4_HUMAN_Seuma_2021	160	5	spearman_r	0.700892	Local-single	Supervised	LR
1748	PABP_YEAST_Melamed_2013	20	1	spearman_r	0.735607	Local-single	Supervised	LR
1749	GRB2_HUMAN_Faure_2021	40	5	spearman_r	0.377734	Compound-multi	Supervised	LR
1750	GFP_AEQVI_Sarkisyan_2016	40	3	spearman_r	0.415699	Local-single	Supervised	LR
1751	A4_HUMAN_Seuma_2021	80	5	spearman_r	0.62122	Compound-multi	Supervised	LR
1752	GFP_AEQVI_Sarkisyan_2016	80	3	spearman_r	0.191279	Local-single	Supervised	LR
1753	A4_HUMAN_Seuma_2021	320	5	spearman_r	0.606229	Local-single	Supervised	LR
1754	GRB2_HUMAN_Faure_2021	20	5	spearman_r	0.701504	Local-single	Supervised	LR
1755	PABP_YEAST_Melamed_2013	40	1	spearman_r	0.854417	Local-single	Supervised	LR
1756	GRB2_HUMAN_Faure_2021	40	5	spearman_r	0.741768	Local-single	Supervised	LR
1757	PABP_YEAST_Melamed_2013	40	1	spearman_r	0.370817	Compound-multi	Supervised	LR
1758	A4_HUMAN_Seuma_2021	160	5	spearman_r	0.552811	Compound-multi	Supervised	LR
1759	GRB2_HUMAN_Faure_2021	20	5	spearman_r	0.0272727	Compound-multi	Supervised	LR
1760	PABP_YEAST_Melamed_2013	80	1	spearman_r	0.588539	Local-single	Supervised	LR
1761	GFP_AEQVI_Sarkisyan_2016	80	3	spearman_r	0.396237	Compound-multi	Supervised	LR
1762	GFP_AEQVI_Sarkisyan_2016	160	4	spearman_r	0.376452	Local-single	Supervised	LR
1763	GRB2_HUMAN_Faure_2021	320	4	spearman_r	0.431949	Local-single	Supervised	LR
1764	CAPSD_AAV2S_Sinai_substitutions_2021	160	2	spearman_r	0.635214	Compound-multi	Supervised	LR
1765	CAPSD_AAV2S_Sinai_substitutions_2021	160	2	spearman_r	0.659466	Local-single	Supervised	LR
1766	GRB2_HUMAN_Faure_2021	80	1	spearman_r	0.584181	Local-single	Supervised	LR
1767	GFP_AEQVI_Sarkisyan_2016	40	4	spearman_r	0.734419	Local-single	Supervised	LR
1768	CAPSD_AAV2S_Sinai_substitutions_2021	320	2	spearman_r	0.474941	Compound-multi	Supervised	LR
1769	CAPSD_AAV2S_Sinai_substitutions_2021	320	2	spearman_r	0.61478	Local-single	Supervised	LR
1770	GRB2_HUMAN_Faure_2021	80	1	spearman_r	0.502055	Compound-multi	Supervised	LR
1771	GFP_AEQVI_Sarkisyan_2016	160	1	spearman_r	0.393804	Local-single	Supervised	LR
1772	GRB2_HUMAN_Faure_2021	160	1	spearman_r	0.232324	Compound-multi	Supervised	LR
1773	CAPSD_AAV2S_Sinai_substitutions_2021	20	3	spearman_r	0.802198	Compound-multi	Supervised	LR
1774	GRB2_HUMAN_Faure_2021	40	1	spearman_r	0.771066	Local-single	Supervised	LR
1775	CAPSD_AAV2S_Sinai_substitutions_2021	40	3	spearman_r	0.899953	Compound-multi	Supervised	LR
1776	CAPSD_AAV2S_Sinai_substitutions_2021	40	3	spearman_r	0.71271	Local-single	Supervised	LR
1777	GRB2_HUMAN_Faure_2021	40	1	spearman_r	0.353846	Compound-multi	Supervised	LR
1778	GFP_AEQVI_Sarkisyan_2016	160	1	spearman_r	0.41462	Compound-multi	Supervised	LR
1779	CAPSD_AAV2S_Sinai_substitutions_2021	80	3	spearman_r	0.769424	Compound-multi	Supervised	LR
1780	GFP_AEQVI_Sarkisyan_2016	80	4	spearman_r	0.455078	Compound-multi	Supervised	LR
1781	GRB2_HUMAN_Faure_2021	20	1	spearman_r	0.818341	Local-single	Supervised	LR
1782	CAPSD_AAV2S_Sinai_substitutions_2021	20	3	spearman_r	0.533363	Local-single	Supervised	LR
1783	CAPSD_AAV2S_Sinai_substitutions_2021	80	2	spearman_r	0.714169	Local-single	Supervised	LR
1784	GFP_AEQVI_Sarkisyan_2016	320	1	spearman_r	0.203278	Compound-multi	Supervised	LR
1785	GRB2_HUMAN_Faure_2021	160	1	spearman_r	0.569847	Local-single	Supervised	LR
1786	CAPSD_AAV2S_Sinai_substitutions_2021	80	1	spearman_r	0.675166	Compound-multi	Supervised	LR
1787	CAPSD_AAV2S_Sinai_substitutions_2021	80	1	spearman_r	0.862921	Local-single	Supervised	LR
1788	GRB2_HUMAN_Faure_2021	40	2	spearman_r	0.393389	Compound-multi	Supervised	LR
1789	GFP_AEQVI_Sarkisyan_2016	20	2	spearman_r	0.352585	Compound-multi	Supervised	LR
1790	CAPSD_AAV2S_Sinai_substitutions_2021	160	1	spearman_r	0.615255	Compound-multi	Supervised	LR
1791	GRB2_HUMAN_Faure_2021	20	2	spearman_r	0.654735	Local-single	Supervised	LR
1792	CAPSD_AAV2S_Sinai_substitutions_2021	160	1	spearman_r	0.551798	Local-single	Supervised	LR
1793	CAPSD_AAV2S_Sinai_substitutions_2021	320	1	spearman_r	0.593921	Compound-multi	Supervised	LR
1794	GRB2_HUMAN_Faure_2021	160	5	spearman_r	0.353936	Compound-multi	Supervised	LR
1795	CAPSD_AAV2S_Sinai_substitutions_2021	320	1	spearman_r	0.641293	Local-single	Supervised	LR
1796	GFP_AEQVI_Sarkisyan_2016	40	4	spearman_r	0.785573	Compound-multi	Supervised	LR
1797	GFP_AEQVI_Sarkisyan_2016	320	1	spearman_r	0.121774	Local-single	Supervised	LR
1798	CAPSD_AAV2S_Sinai_substitutions_2021	20	2	spearman_r	0.721212	Compound-multi	Supervised	LR
1799	GRB2_HUMAN_Faure_2021	320	1	spearman_r	0.400404	Local-single	Supervised	LR
1800	CAPSD_AAV2S_Sinai_substitutions_2021	20	2	spearman_r	0.106218	Local-single	Supervised	LR
1801	CAPSD_AAV2S_Sinai_substitutions_2021	40	2	spearman_r	0.017705	Compound-multi	Supervised	LR
1802	GRB2_HUMAN_Faure_2021	320	1	spearman_r	0.301275	Compound-multi	Supervised	LR
1803	CAPSD_AAV2S_Sinai_substitutions_2021	40	2	spearman_r	0.731201	Local-single	Supervised	LR
1804	CAPSD_AAV2S_Sinai_substitutions_2021	80	2	spearman_r	0.736014	Compound-multi	Supervised	LR
1805	CAPSD_AAV2S_Sinai_substitutions_2021	80	3	spearman_r	0.802207	Local-single	Supervised	LR
1806	GRB2_HUMAN_Faure_2021	40	2	spearman_r	0.632194	Local-single	Supervised	LR
1807	CAPSD_AAV2S_Sinai_substitutions_2021	160	3	spearman_r	0.715735	Compound-multi	Supervised	LR
1808	CAPSD_AAV2S_Sinai_substitutions_2021	160	3	spearman_r	0.726788	Local-single	Supervised	LR
1809	CAPSD_AAV2S_Sinai_substitutions_2021	20	5	spearman_r	0.190909	Compound-multi	Supervised	LR
1810	CAPSD_AAV2S_Sinai_substitutions_2021	20	5	spearman_r	0.747675	Local-single	Supervised	LR
1811	GFP_AEQVI_Sarkisyan_2016	40	5	spearman_r	0.185431	Compound-multi	Supervised	LR
1812	GFP_AEQVI_Sarkisyan_2016	40	1	spearman_r	0.260678	Compound-multi	Supervised	LR
1813	GFP_AEQVI_Sarkisyan_2016	160	4	spearman_r	0.331358	Compound-multi	Supervised	LR
1814	CAPSD_AAV2S_Sinai_substitutions_2021	40	5	spearman_r	0.483416	Compound-multi	Supervised	LR
1815	GFP_AEQVI_Sarkisyan_2016	20	5	spearman_r	0.680202	Local-single	Supervised	LR
1816	CAPSD_AAV2S_Sinai_substitutions_2021	40	5	spearman_r	0.528518	Local-single	Supervised	LR
1817	GFP_AEQVI_Sarkisyan_2016	40	5	spearman_r	0.490879	Local-single	Supervised	LR
1818	CAPSD_AAV2S_Sinai_substitutions_2021	80	5	spearman_r	0.811199	Compound-multi	Supervised	LR
1819	GFP_AEQVI_Sarkisyan_2016	20	1	spearman_r	0.756923	Local-single	Supervised	LR
1820	CAPSD_AAV2S_Sinai_substitutions_2021	80	5	spearman_r	0.804062	Local-single	Supervised	LR
1821	CAPSD_AAV2S_Sinai_substitutions_2021	160	5	spearman_r	0.762219	Compound-multi	Supervised	LR
1822	GFP_AEQVI_Sarkisyan_2016	320	4	spearman_r	0.270907	Local-single	Supervised	LR
1823	CAPSD_AAV2S_Sinai_substitutions_2021	160	5	spearman_r	0.780737	Local-single	Supervised	LR
1824	CAPSD_AAV2S_Sinai_substitutions_2021	320	5	spearman_r	0.583035	Compound-multi	Supervised	LR
1825	GFP_AEQVI_Sarkisyan_2016	320	4	spearman_r	0.305083	Compound-multi	Supervised	LR
1826	CAPSD_AAV2S_Sinai_substitutions_2021	320	5	spearman_r	0.545333	Local-single	Supervised	LR
1827	GFP_AEQVI_Sarkisyan_2016	20	5	spearman_r	0.430303	Compound-multi	Supervised	LR
1828	CAPSD_AAV2S_Sinai_substitutions_2021	320	4	spearman_r	0.596024	Local-single	Supervised	LR
1829	CAPSD_AAV2S_Sinai_substitutions_2021	320	4	spearman_r	0.556035	Compound-multi	Supervised	LR
1830	GFP_AEQVI_Sarkisyan_2016	80	5	spearman_r	0.202925	Compound-multi	Supervised	LR
1831	GFP_AEQVI_Sarkisyan_2016	80	1	spearman_r	0.354305	Local-single	Supervised	LR
1832	CAPSD_AAV2S_Sinai_substitutions_2021	320	3	spearman_r	0.540088	Compound-multi	Supervised	LR
1833	GFP_AEQVI_Sarkisyan_2016	320	5	spearman_r	0.222897	Local-single	Supervised	LR
1834	CAPSD_AAV2S_Sinai_substitutions_2021	320	3	spearman_r	0.584418	Local-single	Supervised	LR
1835	CAPSD_AAV2S_Sinai_substitutions_2021	20	4	spearman_r	0.570588	Compound-multi	Supervised	LR
1836	GFP_AEQVI_Sarkisyan_2016	320	5	spearman_r	0.179022	Compound-multi	Supervised	LR
1837	CAPSD_AAV2S_Sinai_substitutions_2021	20	4	spearman_r	0.885771	Local-single	Supervised	LR
1838	CAPSD_AAV2S_Sinai_substitutions_2021	40	4	spearman_r	0.475133	Compound-multi	Supervised	LR
1839	GFP_AEQVI_Sarkisyan_2016	160	5	spearman_r	0.33993	Local-single	Supervised	LR
1840	GFP_AEQVI_Sarkisyan_2016	80	1	spearman_r	0.483639	Compound-multi	Supervised	LR
1841	CAPSD_AAV2S_Sinai_substitutions_2021	40	4	spearman_r	0.348162	Local-single	Supervised	LR
1842	GFP_AEQVI_Sarkisyan_2016	160	5	spearman_r	0.166241	Compound-multi	Supervised	LR
1843	CAPSD_AAV2S_Sinai_substitutions_2021	80	4	spearman_r	0.692611	Compound-multi	Supervised	LR
1844	GFP_AEQVI_Sarkisyan_2016	80	4	spearman_r	0.390515	Local-single	Supervised	LR
1845	CAPSD_AAV2S_Sinai_substitutions_2021	80	4	spearman_r	0.723502	Local-single	Supervised	LR
1846	GFP_AEQVI_Sarkisyan_2016	80	5	spearman_r	0.403204	Local-single	Supervised	LR
1847	CAPSD_AAV2S_Sinai_substitutions_2021	160	4	spearman_r	0.612942	Compound-multi	Supervised	LR
1848	GFP_AEQVI_Sarkisyan_2016	40	1	spearman_r	0.317723	Local-single	Supervised	LR
1849	CAPSD_AAV2S_Sinai_substitutions_2021	160	4	spearman_r	0.695074	Local-single	Supervised	LR
1850	GRB2_HUMAN_Faure_2021	20	1	spearman_r	0.601299	Compound-multi	Supervised	LR
1851	CAPSD_AAV2S_Sinai_substitutions_2021	40	1	spearman_r	0.548782	Local-single	Supervised	LR
1852	CAPSD_AAV2S_Sinai_substitutions_2021	40	1	spearman_r	0.547431	Compound-multi	Supervised	LR
1853	GRB2_HUMAN_Faure_2021	80	2	spearman_r	0.702273	Compound-multi	Supervised	LR
1854	GRB2_HUMAN_Faure_2021	40	4	spearman_r	0.557025	Compound-multi	Supervised	LR
1855	GFP_AEQVI_Sarkisyan_2016	160	3	spearman_r	0.20368	Local-single	Supervised	LR
1856	GFP_AEQVI_Sarkisyan_2016	320	2	spearman_r	0.194552	Compound-multi	Supervised	LR
1857	PABP_YEAST_Melamed_2013	20	3	spearman_r	0.410989	Compound-multi	Supervised	LR
1858	GRB2_HUMAN_Faure_2021	20	4	spearman_r	0.711753	Local-single	Supervised	LR
1859	PABP_YEAST_Melamed_2013	20	3	spearman_r	0.617364	Local-single	Supervised	LR
1860	PABP_YEAST_Melamed_2013	40	3	spearman_r	0.217391	Compound-multi	Supervised	LR
1861	GRB2_HUMAN_Faure_2021	20	4	spearman_r	0.806061	Compound-multi	Supervised	LR
1862	PABP_YEAST_Melamed_2013	320	2	spearman_r	0.497138	Local-single	Supervised	LR
1863	PABP_YEAST_Melamed_2013	40	3	spearman_r	0.715263	Local-single	Supervised	LR
1864	PABP_YEAST_Melamed_2013	80	3	spearman_r	0.727672	Compound-multi	Supervised	LR
1865	GRB2_HUMAN_Faure_2021	320	3	spearman_r	0.423209	Local-single	Supervised	LR
1866	PABP_YEAST_Melamed_2013	80	3	spearman_r	0.755504	Local-single	Supervised	LR
1867	PABP_YEAST_Melamed_2013	160	3	spearman_r	0.508201	Compound-multi	Supervised	LR
1868	GRB2_HUMAN_Faure_2021	320	3	spearman_r	0.413375	Compound-multi	Supervised	LR
1869	PABP_YEAST_Melamed_2013	160	3	spearman_r	0.650693	Local-single	Supervised	LR
1870	PABP_YEAST_Melamed_2013	320	3	spearman_r	0.460737	Compound-multi	Supervised	LR
1871	GRB2_HUMAN_Faure_2021	160	3	spearman_r	0.498115	Local-single	Supervised	LR
1872	GFP_AEQVI_Sarkisyan_2016	160	2	spearman_r	0.296884	Local-single	Supervised	LR
1873	PABP_YEAST_Melamed_2013	320	2	spearman_r	0.506294	Compound-multi	Supervised	LR
1874	GRB2_HUMAN_Faure_2021	40	4	spearman_r	0.824605	Local-single	Supervised	LR
1875	PABP_YEAST_Melamed_2013	160	2	spearman_r	0.536928	Local-single	Supervised	LR
1876	GFP_AEQVI_Sarkisyan_2016	20	3	spearman_r	0.491642	Local-single	Supervised	LR
1877	PABP_YEAST_Melamed_2013	160	1	spearman_r	0.729929	Local-single	Supervised	LR
1878	PABP_YEAST_Melamed_2013	320	1	spearman_r	0.392253	Compound-multi	Supervised	LR
1879	GRB2_HUMAN_Faure_2021	320	4	spearman_r	0.401878	Compound-multi	Supervised	LR
1880	PABP_YEAST_Melamed_2013	320	1	spearman_r	0.51354	Local-single	Supervised	LR
1881	PABP_YEAST_Melamed_2013	20	2	spearman_r	0.188235	Compound-multi	Supervised	LR
1882	GRB2_HUMAN_Faure_2021	160	4	spearman_r	0.483013	Local-single	Supervised	LR
1883	GFP_AEQVI_Sarkisyan_2016	20	3	spearman_r	0.220193	Compound-multi	Supervised	LR
1884	PABP_YEAST_Melamed_2013	20	2	spearman_r	0.467375	Local-single	Supervised	LR
1885	GFP_AEQVI_Sarkisyan_2016	160	3	spearman_r	0.202088	Compound-multi	Supervised	LR
1886	GRB2_HUMAN_Faure_2021	160	4	spearman_r	0.574204	Compound-multi	Supervised	LR
1887	PABP_YEAST_Melamed_2013	40	2	spearman_r	0.838921	Compound-multi	Supervised	LR
1888	PABP_YEAST_Melamed_2013	40	2	spearman_r	0.649339	Local-single	Supervised	LR
1889	GRB2_HUMAN_Faure_2021	80	4	spearman_r	0.676966	Local-single	Supervised	LR
1890	PABP_YEAST_Melamed_2013	80	2	spearman_r	0.480364	Compound-multi	Supervised	LR
1891	PABP_YEAST_Melamed_2013	80	2	spearman_r	0.711776	Local-single	Supervised	LR
1892	GRB2_HUMAN_Faure_2021	80	4	spearman_r	0.519561	Compound-multi	Supervised	LR
1893	GFP_AEQVI_Sarkisyan_2016	320	2	spearman_r	0.197256	Local-single	Supervised	LR
1894	PABP_YEAST_Melamed_2013	160	2	spearman_r	0.409316	Compound-multi	Supervised	LR
1895	GFP_AEQVI_Sarkisyan_2016	320	3	spearman_r	0.269236	Compound-multi	Supervised	LR
1896	GFP_AEQVI_Sarkisyan_2016	160	2	spearman_r	0.264124	Compound-multi	Supervised	LR
1897	PABP_YEAST_Melamed_2013	320	3	spearman_r	0.593984	Local-single	Supervised	LR
1898	GRB2_HUMAN_Faure_2021	160	3	spearman_r	0.566192	Compound-multi	Supervised	LR
1899	GFP_AEQVI_Sarkisyan_2016	40	2	spearman_r	0.603581	Local-single	Supervised	LR
1900	PABP_YEAST_Melamed_2013	40	5	spearman_r	0.558001	Local-single	Supervised	LR
1901	GFP_AEQVI_Sarkisyan_2016	20	4	spearman_r	0.439033	Compound-multi	Supervised	LR
1902	PABP_YEAST_Melamed_2013	80	5	spearman_r	0.4953	Compound-multi	Supervised	LR
1903	GRB2_HUMAN_Faure_2021	320	2	spearman_r	0.42403	Compound-multi	Supervised	LR
1904	PABP_YEAST_Melamed_2013	80	5	spearman_r	0.531607	Local-single	Supervised	LR
1905	PABP_YEAST_Melamed_2013	160	5	spearman_r	0.690382	Compound-multi	Supervised	LR
1906	GRB2_HUMAN_Faure_2021	160	2	spearman_r	0.558774	Local-single	Supervised	LR
1907	GFP_AEQVI_Sarkisyan_2016	40	2	spearman_r	0.226087	Compound-multi	Supervised	LR
1908	GFP_AEQVI_Sarkisyan_2016	20	1	spearman_r	0.528878	Compound-multi	Supervised	LR
1909	PABP_YEAST_Melamed_2013	160	5	spearman_r	0.704714	Local-single	Supervised	LR
1910	GRB2_HUMAN_Faure_2021	160	2	spearman_r	0.544367	Compound-multi	Supervised	LR
1911	PABP_YEAST_Melamed_2013	320	5	spearman_r	0.395375	Compound-multi	Supervised	LR
1912	PABP_YEAST_Melamed_2013	320	5	spearman_r	0.497254	Local-single	Supervised	LR
1913	GRB2_HUMAN_Faure_2021	80	2	spearman_r	0.630093	Local-single	Supervised	LR
1914	CAPSD_AAV2S_Sinai_substitutions_2021	20	1	spearman_r	0.527273	Compound-multi	Supervised	LR
1915	GFP_AEQVI_Sarkisyan_2016	20	2	spearman_r	0.754544	Local-single	Supervised	LR
1916	CAPSD_AAV2S_Sinai_substitutions_2021	20	1	spearman_r	0.872359	Local-single	Supervised	LR
1917	GFP_AEQVI_Sarkisyan_2016	20	4	spearman_r	0.560789	Local-single	Supervised	LR
1918	GRB2_HUMAN_Faure_2021	320	2	spearman_r	0.522643	Local-single	Supervised	LR
1919	PABP_YEAST_Melamed_2013	160	1	spearman_r	0.617456	Compound-multi	Supervised	LR
1920	PABP_YEAST_Melamed_2013	40	5	spearman_r	0.423964	Compound-multi	Supervised	LR
1921	GRB2_HUMAN_Faure_2021	20	3	spearman_r	0.774359	Compound-multi	Supervised	LR
1922	PABP_YEAST_Melamed_2013	20	4	spearman_r	0.754545	Compound-multi	Supervised	LR
1923	PABP_YEAST_Melamed_2013	20	4	spearman_r	0.757767	Local-single	Supervised	LR
1924	GRB2_HUMAN_Faure_2021	80	3	spearman_r	0.496981	Local-single	Supervised	LR
1925	PABP_YEAST_Melamed_2013	40	4	spearman_r	0.535096	Compound-multi	Supervised	LR
1926	GFP_AEQVI_Sarkisyan_2016	80	2	spearman_r	0.0823744	Local-single	Supervised	LR
1927	PABP_YEAST_Melamed_2013	40	4	spearman_r	0.577347	Local-single	Supervised	LR
1928	GRB2_HUMAN_Faure_2021	80	3	spearman_r	0.687803	Compound-multi	Supervised	LR
1929	PABP_YEAST_Melamed_2013	80	4	spearman_r	0.544339	Compound-multi	Supervised	LR
1930	PABP_YEAST_Melamed_2013	80	4	spearman_r	0.737148	Local-single	Supervised	LR
1931	GRB2_HUMAN_Faure_2021	40	3	spearman_r	0.748257	Local-single	Supervised	LR
1932	GFP_AEQVI_Sarkisyan_2016	320	3	spearman_r	0.297519	Local-single	Supervised	LR
1933	PABP_YEAST_Melamed_2013	160	4	spearman_r	0.64487	Compound-multi	Supervised	LR
1934	GFP_AEQVI_Sarkisyan_2016	80	2	spearman_r	0.225002	Compound-multi	Supervised	LR
1935	PABP_YEAST_Melamed_2013	160	4	spearman_r	0.578105	Local-single	Supervised	LR
1936	GRB2_HUMAN_Faure_2021	40	3	spearman_r	0.391608	Compound-multi	Supervised	LR
1937	PABP_YEAST_Melamed_2013	320	4	spearman_r	0.474893	Compound-multi	Supervised	LR
1938	GRB2_HUMAN_Faure_2021	20	3	spearman_r	0.492825	Local-single	Supervised	LR
1939	PABP_YEAST_Melamed_2013	320	4	spearman_r	0.5795	Local-single	Supervised	LR
1940	PABP_YEAST_Melamed_2013	20	5	spearman_r	0.739938	Compound-multi	Supervised	LR
1941	PABP_YEAST_Melamed_2013	20	5	spearman_r	0.677115	Local-single	Supervised	LR
1942	GRB2_HUMAN_Faure_2021	20	2	spearman_r	0.791209	Compound-multi	Supervised	LR
1943	A4_HUMAN_Seuma_2021	80	4	spearman_r	0.555953	Compound-multi	Supervised	LR
1944	DLG4_HUMAN_Faure_2021	80	1	spearman_r	0.320977	Compound-multi	Supervised	LR
1945	A4_HUMAN_Seuma_2021	320	3	spearman_r	0.524608	Compound-multi	Supervised	LR
1946	SPG1_STRSG_Olson_2014	160	2	spearman_r	0.736849	Local-single	Supervised	LR
1947	DLG4_HUMAN_Faure_2021	40	1	spearman_r	0.170161	Compound-multi	Supervised	LR
1948	SPG1_STRSG_Olson_2014	20	5	spearman_r	0.86185	Local-single	Supervised	LR
1949	HIS7_YEAST_Pokusaeva_2019	80	1	spearman_r	0.329149	Local-single	Supervised	LR
1950	F7YBW8_MESOW_Aakre_2015	20	5	spearman_r	0.825099	Local-single	Supervised	LR
1951	DLG4_HUMAN_Faure_2021	40	4	spearman_r	0.0147059	Compound-multi	Supervised	LR
1952	DLG4_HUMAN_Faure_2021	20	1	spearman_r	0.786835	Local-single	Supervised	LR
1953	SPG1_STRSG_Olson_2014	20	1	spearman_r	0.867434	Compound-multi	Supervised	LR
1954	YAP1_HUMAN_Araya_2012	20	1	spearman_r	0.16044	Compound-multi	Supervised	LR
1955	A4_HUMAN_Seuma_2021	160	3	spearman_r	0.477842	Local-single	Supervised	LR
1956	SPG1_STRSG_Olson_2014	40	4	spearman_r	0.803826	Local-single	Supervised	LR
1957	YAP1_HUMAN_Araya_2012	80	4	spearman_r	0.487573	Compound-multi	Supervised	LR
1958	A4_HUMAN_Seuma_2021	40	2	spearman_r	0.648351	Compound-multi	Supervised	LR
1959	DLG4_HUMAN_Faure_2021	40	4	spearman_r	0.652566	Local-single	Supervised	LR
1960	DLG4_HUMAN_Faure_2021	160	5	spearman_r	0.358218	Compound-multi	Supervised	LR
1961	SPG1_STRSG_Olson_2014	20	5	spearman_r	0.744697	Compound-multi	Supervised	LR
1962	A4_HUMAN_Seuma_2021	160	3	spearman_r	0.57043	Compound-multi	Supervised	LR
1963	SPG1_STRSG_Olson_2014	320	2	spearman_r	0.662387	Compound-multi	Supervised	LR
1964	HIS7_YEAST_Pokusaeva_2019	20	2	spearman_r	0.235088	Compound-multi	Supervised	LR
1965	A4_HUMAN_Seuma_2021	40	2	spearman_r	0.713105	Local-single	Supervised	LR
1966	YAP1_HUMAN_Araya_2012	20	1	spearman_r	0.699303	Local-single	Supervised	LR
1967	DLG4_HUMAN_Faure_2021	20	1	spearman_r	0.675824	Compound-multi	Supervised	LR
1968	DLG4_HUMAN_Faure_2021	80	4	spearman_r	0.352861	Compound-multi	Supervised	LR
1969	YAP1_HUMAN_Araya_2012	80	4	spearman_r	0.684647	Local-single	Supervised	LR
1970	A4_HUMAN_Seuma_2021	80	3	spearman_r	0.481381	Local-single	Supervised	LR
1971	HIS7_YEAST_Pokusaeva_2019	80	5	spearman_r	0.293929	Local-single	Supervised	LR
1972	HIS7_YEAST_Pokusaeva_2019	20	3	spearman_r	0.449407	Local-single	Supervised	LR
1973	YAP1_HUMAN_Araya_2012	80	2	spearman_r	0.547773	Local-single	Supervised	LR
1974	DLG4_HUMAN_Faure_2021	160	5	spearman_r	0.466639	Local-single	Supervised	LR
1975	SPG1_STRSG_Olson_2014	80	3	spearman_r	0.745303	Local-single	Supervised	LR
1976	HIS7_YEAST_Pokusaeva_2019	80	4	spearman_r	0.265504	Compound-multi	Supervised	LR
1977	A4_HUMAN_Seuma_2021	20	2	spearman_r	0.635714	Compound-multi	Supervised	LR
1978	DLG4_HUMAN_Faure_2021	80	1	spearman_r	0.490924	Local-single	Supervised	LR
1979	SPG1_STRSG_Olson_2014	40	5	spearman_r	0.853513	Local-single	Supervised	LR
1980	HIS7_YEAST_Pokusaeva_2019	40	1	spearman_r	0.317538	Local-single	Supervised	LR
1981	DLG4_HUMAN_Faure_2021	320	3	spearman_r	0.0876495	Compound-multi	Supervised	LR
1982	SPG1_STRSG_Olson_2014	40	4	spearman_r	0.601692	Compound-multi	Supervised	LR
1983	A4_HUMAN_Seuma_2021	20	4	spearman_r	0.896774	Local-single	Supervised	LR
1984	F7YBW8_MESOW_Aakre_2015	20	4	spearman_r	0.365307	Compound-multi	Supervised	LR
1985	YAP1_HUMAN_Araya_2012	40	4	spearman_r	0.689131	Compound-multi	Supervised	LR
1986	DLG4_HUMAN_Faure_2021	320	3	spearman_r	0.55418	Local-single	Supervised	LR
1987	YAP1_HUMAN_Araya_2012	160	2	spearman_r	0.637354	Local-single	Supervised	LR
1988	DLG4_HUMAN_Faure_2021	320	5	spearman_r	0.510984	Compound-multi	Supervised	LR
1989	YAP1_HUMAN_Araya_2012	20	2	spearman_r	0.736323	Local-single	Supervised	LR
1990	SPG1_STRSG_Olson_2014	40	1	spearman_r	0.614177	Compound-multi	Supervised	LR
1991	SPG1_STRSG_Olson_2014	160	2	spearman_r	0.705416	Compound-multi	Supervised	LR
1992	A4_HUMAN_Seuma_2021	20	4	spearman_r	0.885714	Compound-multi	Supervised	LR
1993	A4_HUMAN_Seuma_2021	20	2	spearman_r	0.805385	Local-single	Supervised	LR
1994	F7YBW8_MESOW_Aakre_2015	20	4	spearman_r	0.608462	Local-single	Supervised	LR
1995	HIS7_YEAST_Pokusaeva_2019	80	1	spearman_r	0.114809	Compound-multi	Supervised	LR
1996	DLG4_HUMAN_Faure_2021	20	4	spearman_r	0.664336	Compound-multi	Supervised	LR
1997	SPG1_STRSG_Olson_2014	40	5	spearman_r	0.792713	Compound-multi	Supervised	LR
1998	YAP1_HUMAN_Araya_2012	40	4	spearman_r	0.724562	Local-single	Supervised	LR
[truncated: 2,351 more rows]

## Sheet: NDCG@10
	protein	data_size	split_index	metric_name	metric_value	test set	Model Type	Model
0	GFP_AEQVI_Sarkisyan_2016	80	3	ndcg	0.758673	Compound-multi	Supervised	A-VAE
1	GRB2_HUMAN_Faure_2021	160	1	ndcg	0.752804	Compound-multi	Supervised	A-VAE
2	DLG4_HUMAN_Faure_2021	20	2	ndcg	0.798643	Local-single	Supervised	A-VAE
3	CAPSD_AAV2S_Sinai_substitutions_2021	160	2	ndcg	0.573117	Compound-multi	Supervised	A-VAE
4	SPG1_STRSG_Olson_2014	40	2	ndcg	0.572946	Compound-multi	Supervised	A-VAE
5	DLG4_HUMAN_Faure_2021	40	2	ndcg	0.698342	Compound-multi	Supervised	A-VAE
6	CAPSD_AAV2S_Sinai_substitutions_2021	80	2	ndcg	0.68671	Local-single	Supervised	A-VAE
7	GRB2_HUMAN_Faure_2021	160	1	ndcg	0.791001	Local-single	Supervised	A-VAE
8	DLG4_HUMAN_Faure_2021	40	2	ndcg	0.702104	Local-single	Supervised	A-VAE
9	DLG4_HUMAN_Faure_2021	20	2	ndcg	0.338338	Compound-multi	Supervised	A-VAE
10	CAPSD_AAV2S_Sinai_substitutions_2021	80	2	ndcg	0.415074	Compound-multi	Supervised	A-VAE
11	DLG4_HUMAN_Faure_2021	80	2	ndcg	0.54651	Compound-multi	Supervised	A-VAE
12	CAPSD_AAV2S_Sinai_substitutions_2021	40	2	ndcg	0.491338	Local-single	Supervised	A-VAE
13	GRB2_HUMAN_Faure_2021	320	1	ndcg	0.559097	Compound-multi	Supervised	A-VAE
14	DLG4_HUMAN_Faure_2021	80	2	ndcg	0.676554	Local-single	Supervised	A-VAE
15	CAPSD_AAV2S_Sinai_substitutions_2021	40	2	ndcg	0.194876	Compound-multi	Supervised	A-VAE
16	SPG1_STRSG_Olson_2014	20	2	ndcg	0.829505	Compound-multi	Supervised	A-VAE
17	DLG4_HUMAN_Faure_2021	160	2	ndcg	0.791026	Compound-multi	Supervised	A-VAE
18	GRB2_HUMAN_Faure_2021	320	1	ndcg	0.722645	Local-single	Supervised	A-VAE
19	SPG1_STRSG_Olson_2014	20	2	ndcg	0.640969	Local-single	Supervised	A-VAE
20	CAPSD_AAV2S_Sinai_substitutions_2021	20	2	ndcg	0.270455	Local-single	Supervised	A-VAE
21	CAPSD_AAV2S_Sinai_substitutions_2021	160	2	ndcg	0.654895	Local-single	Supervised	A-VAE
22	DLG4_HUMAN_Faure_2021	320	1	ndcg	0.754328	Local-single	Supervised	A-VAE
23	CAPSD_AAV2S_Sinai_substitutions_2021	40	3	ndcg	0.804705	Local-single	Supervised	A-VAE
24	DLG4_HUMAN_Faure_2021	40	1	ndcg	0.705713	Local-single	Supervised	A-VAE
25	DLG4_HUMAN_Faure_2021	80	1	ndcg	0.638626	Compound-multi	Supervised	A-VAE
26	CAPSD_AAV2S_Sinai_substitutions_2021	40	3	ndcg	0.874177	Compound-multi	Supervised	A-VAE
27	GRB2_HUMAN_Faure_2021	40	1	ndcg	0.87842	Local-single	Supervised	A-VAE
28	SPG1_STRSG_Olson_2014	160	2	ndcg	0.615027	Compound-multi	Supervised	A-VAE
29	DLG4_HUMAN_Faure_2021	80	1	ndcg	0.816714	Local-single	Supervised	A-VAE
30	CAPSD_AAV2S_Sinai_substitutions_2021	20	3	ndcg	0.362973	Local-single	Supervised	A-VAE
31	SPG1_STRSG_Olson_2014	40	2	ndcg	0.76917	Local-single	Supervised	A-VAE
32	DLG4_HUMAN_Faure_2021	160	1	ndcg	0.291851	Compound-multi	Supervised	A-VAE
33	CAPSD_AAV2S_Sinai_substitutions_2021	20	3	ndcg	0.782307	Compound-multi	Supervised	A-VAE
34	SPG1_STRSG_Olson_2014	80	2	ndcg	0.794212	Local-single	Supervised	A-VAE
35	DLG4_HUMAN_Faure_2021	160	1	ndcg	0.682241	Local-single	Supervised	A-VAE
36	CAPSD_AAV2S_Sinai_substitutions_2021	320	2	ndcg	0.835813	Local-single	Supervised	A-VAE
37	DLG4_HUMAN_Faure_2021	320	1	ndcg	0.547454	Compound-multi	Supervised	A-VAE
38	SPG1_STRSG_Olson_2014	80	2	ndcg	0.890775	Compound-multi	Supervised	A-VAE
39	GRB2_HUMAN_Faure_2021	80	1	ndcg	0.735717	Local-single	Supervised	A-VAE
40	CAPSD_AAV2S_Sinai_substitutions_2021	320	2	ndcg	0.261354	Compound-multi	Supervised	A-VAE
41	GRB2_HUMAN_Faure_2021	80	1	ndcg	0.764188	Compound-multi	Supervised	A-VAE
42	DLG4_HUMAN_Faure_2021	160	2	ndcg	0.780625	Local-single	Supervised	A-VAE
43	SPG1_STRSG_Olson_2014	320	1	ndcg	0.455528	Local-single	Supervised	A-VAE
44	DLG4_HUMAN_Faure_2021	320	2	ndcg	0.429775	Compound-multi	Supervised	A-VAE
45	DLG4_HUMAN_Faure_2021	160	3	ndcg	0.595206	Compound-multi	Supervised	A-VAE
46	SPG1_STRSG_Olson_2014	80	1	ndcg	0.864721	Compound-multi	Supervised	A-VAE
47	DLG4_HUMAN_Faure_2021	160	3	ndcg	0.519643	Local-single	Supervised	A-VAE
48	GRB2_HUMAN_Faure_2021	80	2	ndcg	0.78365	Compound-multi	Supervised	A-VAE
49	CAPSD_AAV2S_Sinai_substitutions_2021	40	1	ndcg	0.702365	Compound-multi	Supervised	A-VAE
50	SPG1_STRSG_Olson_2014	40	1	ndcg	0.564848	Local-single	Supervised	A-VAE
51	DLG4_HUMAN_Faure_2021	320	3	ndcg	0.0669792	Compound-multi	Supervised	A-VAE
52	CAPSD_AAV2S_Sinai_substitutions_2021	20	1	ndcg	0.973711	Local-single	Supervised	A-VAE
53	CAPSD_AAV2S_Sinai_substitutions_2021	40	1	ndcg	0.695754	Local-single	Supervised	A-VAE
54	DLG4_HUMAN_Faure_2021	320	3	ndcg	0.531603	Local-single	Supervised	A-VAE
55	CAPSD_AAV2S_Sinai_substitutions_2021	20	1	ndcg	0.117251	Compound-multi	Supervised	A-VAE
56	SPG1_STRSG_Olson_2014	40	1	ndcg	0.288706	Compound-multi	Supervised	A-VAE
57	DLG4_HUMAN_Faure_2021	20	4	ndcg	0.677013	Compound-multi	Supervised	A-VAE
58	PABP_YEAST_Melamed_2013	320	5	ndcg	0.620508	Local-single	Supervised	A-VAE
59	DLG4_HUMAN_Faure_2021	20	4	ndcg	0.582421	Local-single	Supervised	A-VAE
60	GRB2_HUMAN_Faure_2021	160	2	ndcg	0.67144	Compound-multi	Supervised	A-VAE
61	SPG1_STRSG_Olson_2014	20	1	ndcg	0.956673	Local-single	Supervised	A-VAE
62	PABP_YEAST_Melamed_2013	320	5	ndcg	0.559103	Compound-multi	Supervised	A-VAE
63	GRB2_HUMAN_Faure_2021	80	2	ndcg	0.87385	Local-single	Supervised	A-VAE
64	GRB2_HUMAN_Faure_2021	40	2	ndcg	0.903325	Local-single	Supervised	A-VAE
65	DLG4_HUMAN_Faure_2021	80	3	ndcg	0.784883	Local-single	Supervised	A-VAE
66	CAPSD_AAV2S_Sinai_substitutions_2021	80	1	ndcg	0.461895	Compound-multi	Supervised	A-VAE
67	CAPSD_AAV2S_Sinai_substitutions_2021	20	2	ndcg	0.65759	Compound-multi	Supervised	A-VAE
68	GRB2_HUMAN_Faure_2021	20	2	ndcg	0.918479	Compound-multi	Supervised	A-VAE
69	SPG1_STRSG_Olson_2014	320	1	ndcg	0.515416	Compound-multi	Supervised	A-VAE
70	DLG4_HUMAN_Faure_2021	320	2	ndcg	0.595531	Local-single	Supervised	A-VAE
71	CAPSD_AAV2S_Sinai_substitutions_2021	320	1	ndcg	0.803928	Local-single	Supervised	A-VAE
72	DLG4_HUMAN_Faure_2021	20	3	ndcg	0.860106	Compound-multi	Supervised	A-VAE
73	CAPSD_AAV2S_Sinai_substitutions_2021	320	1	ndcg	0.307825	Compound-multi	Supervised	A-VAE
74	SPG1_STRSG_Olson_2014	160	1	ndcg	0.174994	Local-single	Supervised	A-VAE
75	GRB2_HUMAN_Faure_2021	20	2	ndcg	0.781312	Local-single	Supervised	A-VAE
76	DLG4_HUMAN_Faure_2021	20	3	ndcg	0.68614	Local-single	Supervised	A-VAE
77	CAPSD_AAV2S_Sinai_substitutions_2021	160	1	ndcg	0.526767	Local-single	Supervised	A-VAE
78	DLG4_HUMAN_Faure_2021	40	3	ndcg	0.226899	Compound-multi	Supervised	A-VAE
79	CAPSD_AAV2S_Sinai_substitutions_2021	160	1	ndcg	0.415351	Compound-multi	Supervised	A-VAE
80	SPG1_STRSG_Olson_2014	160	1	ndcg	0.0587956	Compound-multi	Supervised	A-VAE
81	GRB2_HUMAN_Faure_2021	40	2	ndcg	0.815454	Compound-multi	Supervised	A-VAE
82	DLG4_HUMAN_Faure_2021	40	3	ndcg	0.674109	Local-single	Supervised	A-VAE
83	CAPSD_AAV2S_Sinai_substitutions_2021	80	1	ndcg	0.897943	Local-single	Supervised	A-VAE
84	DLG4_HUMAN_Faure_2021	80	3	ndcg	0.820094	Compound-multi	Supervised	A-VAE
85	SPG1_STRSG_Olson_2014	80	1	ndcg	0.848681	Local-single	Supervised	A-VAE
86	SPG1_STRSG_Olson_2014	160	2	ndcg	0.583117	Local-single	Supervised	A-VAE
87	DLG4_HUMAN_Faure_2021	40	4	ndcg	0.00544904	Compound-multi	Supervised	A-VAE
88	GRB2_HUMAN_Faure_2021	40	1	ndcg	0.568047	Compound-multi	Supervised	A-VAE
89	DLG4_HUMAN_Faure_2021	40	1	ndcg	0.77019	Compound-multi	Supervised	A-VAE
90	YAP1_HUMAN_Araya_2012	80	3	ndcg	0.172823	Compound-multi	Supervised	A-VAE
91	CAPSD_AAV2S_Sinai_substitutions_2021	40	5	ndcg	0.419667	Local-single	Supervised	A-VAE
92	YAP1_HUMAN_Araya_2012	80	3	ndcg	0.375559	Local-single	Supervised	A-VAE
93	SPG1_STRSG_Olson_2014	320	3	ndcg	0.502799	Local-single	Supervised	A-VAE
94	CAPSD_AAV2S_Sinai_substitutions_2021	40	5	ndcg	0.705568	Compound-multi	Supervised	A-VAE
95	GFP_AEQVI_Sarkisyan_2016	40	5	ndcg	0.460207	Compound-multi	Supervised	A-VAE
96	YAP1_HUMAN_Araya_2012	160	3	ndcg	0.296229	Compound-multi	Supervised	A-VAE
97	CAPSD_AAV2S_Sinai_substitutions_2021	20	5	ndcg	0.719184	Local-single	Supervised	A-VAE
98	GFP_AEQVI_Sarkisyan_2016	20	5	ndcg	0.795538	Local-single	Supervised	A-VAE
99	SPG1_STRSG_Olson_2014	320	3	ndcg	0.595125	Compound-multi	Supervised	A-VAE
100	CAPSD_AAV2S_Sinai_substitutions_2021	20	5	ndcg	0.261587	Compound-multi	Supervised	A-VAE
101	GFP_AEQVI_Sarkisyan_2016	40	5	ndcg	0.532766	Local-single	Supervised	A-VAE
102	YAP1_HUMAN_Araya_2012	20	4	ndcg	0.0867497	Compound-multi	Supervised	A-VAE
103	CAPSD_AAV2S_Sinai_substitutions_2021	320	4	ndcg	0.816582	Local-single	Supervised	A-VAE
104	SPG1_STRSG_Olson_2014	160	3	ndcg	0.538837	Local-single	Supervised	A-VAE
105	YAP1_HUMAN_Araya_2012	20	4	ndcg	0.298233	Local-single	Supervised	A-VAE
106	GFP_AEQVI_Sarkisyan_2016	80	5	ndcg	0.640838	Compound-multi	Supervised	A-VAE
107	CAPSD_AAV2S_Sinai_substitutions_2021	320	4	ndcg	0.294585	Compound-multi	Supervised	A-VAE
108	YAP1_HUMAN_Araya_2012	160	3	ndcg	0.452598	Local-single	Supervised	A-VAE
109	YAP1_HUMAN_Araya_2012	40	4	ndcg	0.754934	Compound-multi	Supervised	A-VAE
110	SPG1_STRSG_Olson_2014	20	4	ndcg	0.771061	Compound-multi	Supervised	A-VAE
111	CAPSD_AAV2S_Sinai_substitutions_2021	80	5	ndcg	0.611614	Compound-multi	Supervised	A-VAE
112	SPG1_STRSG_Olson_2014	80	4	ndcg	0.693847	Compound-multi	Supervised	A-VAE
113	YAP1_HUMAN_Araya_2012	80	2	ndcg	0.638108	Local-single	Supervised	A-VAE
114	CAPSD_AAV2S_Sinai_substitutions_2021	320	5	ndcg	0.865113	Local-single	Supervised	A-VAE
115	GFP_AEQVI_Sarkisyan_2016	320	4	ndcg	0.678592	Compound-multi	Supervised	A-VAE
116	SPG1_STRSG_Olson_2014	40	4	ndcg	0.941408	Local-single	Supervised	A-VAE
117	YAP1_HUMAN_Araya_2012	160	2	ndcg	0.137651	Compound-multi	Supervised	A-VAE
118	CAPSD_AAV2S_Sinai_substitutions_2021	320	5	ndcg	0.578672	Compound-multi	Supervised	A-VAE
119	YAP1_HUMAN_Araya_2012	160	2	ndcg	0.412184	Local-single	Supervised	A-VAE
120	YAP1_HUMAN_Araya_2012	40	3	ndcg	0.620826	Local-single	Supervised	A-VAE
121	GFP_AEQVI_Sarkisyan_2016	320	4	ndcg	0.564555	Local-single	Supervised	A-VAE
122	SPG1_STRSG_Olson_2014	40	4	ndcg	0.60022	Compound-multi	Supervised	A-VAE
123	YAP1_HUMAN_Araya_2012	20	3	ndcg	0.742413	Compound-multi	Supervised	A-VAE
124	CAPSD_AAV2S_Sinai_substitutions_2021	160	5	ndcg	0.553916	Compound-multi	Supervised	A-VAE
125	YAP1_HUMAN_Araya_2012	20	3	ndcg	0.608555	Local-single	Supervised	A-VAE
126	GFP_AEQVI_Sarkisyan_2016	20	5	ndcg	0.486767	Compound-multi	Supervised	A-VAE
127	SPG1_STRSG_Olson_2014	20	4	ndcg	0.893601	Local-single	Supervised	A-VAE
128	CAPSD_AAV2S_Sinai_substitutions_2021	80	5	ndcg	0.90635	Local-single	Supervised	A-VAE
129	YAP1_HUMAN_Araya_2012	40	3	ndcg	0.442536	Compound-multi	Supervised	A-VAE
130	CAPSD_AAV2S_Sinai_substitutions_2021	160	5	ndcg	0.842565	Local-single	Supervised	A-VAE
131	SPG1_STRSG_Olson_2014	160	3	ndcg	0.49516	Compound-multi	Supervised	A-VAE
132	CAPSD_AAV2S_Sinai_substitutions_2021	160	4	ndcg	0.540932	Local-single	Supervised	A-VAE
133	YAP1_HUMAN_Araya_2012	40	4	ndcg	0.794316	Local-single	Supervised	A-VAE
134	SPG1_STRSG_Olson_2014	20	3	ndcg	0.535485	Local-single	Supervised	A-VAE
135	YAP1_HUMAN_Araya_2012	80	5	ndcg	0.232888	Compound-multi	Supervised	A-VAE
136	GFP_AEQVI_Sarkisyan_2016	320	5	ndcg	0.679555	Local-single	Supervised	A-VAE
137	CAPSD_AAV2S_Sinai_substitutions_2021	320	3	ndcg	0.834951	Local-single	Supervised	A-VAE
138	YAP1_HUMAN_Araya_2012	80	5	ndcg	0.715739	Local-single	Supervised	A-VAE
139	CAPSD_AAV2S_Sinai_substitutions_2021	320	3	ndcg	0.38297	Compound-multi	Supervised	A-VAE
140	SPG1_STRSG_Olson_2014	20	3	ndcg	0.698956	Compound-multi	Supervised	A-VAE
141	YAP1_HUMAN_Araya_2012	160	5	ndcg	0.440184	Compound-multi	Supervised	A-VAE
142	YAP1_HUMAN_Araya_2012	40	5	ndcg	0.78892	Local-single	Supervised	A-VAE
143	GRB2_HUMAN_Faure_2021	20	1	ndcg	0.490424	Compound-multi	Supervised	A-VAE
144	YAP1_HUMAN_Araya_2012	160	5	ndcg	0.353525	Local-single	Supervised	A-VAE
145	SPG1_STRSG_Olson_2014	320	2	ndcg	0.576944	Local-single	Supervised	A-VAE
146	CAPSD_AAV2S_Sinai_substitutions_2021	160	3	ndcg	0.535665	Compound-multi	Supervised	A-VAE
147	DLG4_HUMAN_Faure_2021	20	1	ndcg	0.700428	Compound-multi	Supervised	A-VAE
148	GRB2_HUMAN_Faure_2021	20	1	ndcg	0.898603	Local-single	Supervised	A-VAE
149	CAPSD_AAV2S_Sinai_substitutions_2021	80	3	ndcg	0.895673	Local-single	Supervised	A-VAE
150	SPG1_STRSG_Olson_2014	320	2	ndcg	0.717478	Compound-multi	Supervised	A-VAE
151	DLG4_HUMAN_Faure_2021	20	1	ndcg	0.975314	Local-single	Supervised	A-VAE
152	CAPSD_AAV2S_Sinai_substitutions_2021	160	3	ndcg	0.905999	Local-single	Supervised	A-VAE
153	CAPSD_AAV2S_Sinai_substitutions_2021	20	4	ndcg	0.558612	Compound-multi	Supervised	A-VAE
154	YAP1_HUMAN_Araya_2012	40	5	ndcg	0.460639	Compound-multi	Supervised	A-VAE
155	GFP_AEQVI_Sarkisyan_2016	320	5	ndcg	0.509379	Compound-multi	Supervised	A-VAE
156	GFP_AEQVI_Sarkisyan_2016	80	5	ndcg	0.720449	Local-single	Supervised	A-VAE
157	YAP1_HUMAN_Araya_2012	80	4	ndcg	0.0366929	Compound-multi	Supervised	A-VAE
158	CAPSD_AAV2S_Sinai_substitutions_2021	160	4	ndcg	0.556956	Compound-multi	Supervised	A-VAE
159	SPG1_STRSG_Olson_2014	80	3	ndcg	0.609007	Local-single	Supervised	A-VAE
160	YAP1_HUMAN_Araya_2012	80	4	ndcg	0.643344	Local-single	Supervised	A-VAE
161	CAPSD_AAV2S_Sinai_substitutions_2021	80	4	ndcg	0.573764	Local-single	Supervised	A-VAE
162	GFP_AEQVI_Sarkisyan_2016	160	5	ndcg	0.632737	Compound-multi	Supervised	A-VAE
163	YAP1_HUMAN_Araya_2012	160	4	ndcg	0.358696	Compound-multi	Supervised	A-VAE
164	SPG1_STRSG_Olson_2014	80	3	ndcg	0.592406	Compound-multi	Supervised	A-VAE
165	CAPSD_AAV2S_Sinai_substitutions_2021	80	4	ndcg	0.67206	Compound-multi	Supervised	A-VAE
166	YAP1_HUMAN_Araya_2012	160	4	ndcg	0.536909	Local-single	Supervised	A-VAE
167	CAPSD_AAV2S_Sinai_substitutions_2021	40	4	ndcg	0.630644	Local-single	Supervised	A-VAE
168	GFP_AEQVI_Sarkisyan_2016	160	5	ndcg	0.591529	Local-single	Supervised	A-VAE
169	SPG1_STRSG_Olson_2014	40	3	ndcg	0.730181	Local-single	Supervised	A-VAE
170	YAP1_HUMAN_Araya_2012	20	5	ndcg	0.493885	Compound-multi	Supervised	A-VAE
171	CAPSD_AAV2S_Sinai_substitutions_2021	40	4	ndcg	0.96496	Compound-multi	Supervised	A-VAE
172	YAP1_HUMAN_Araya_2012	20	5	ndcg	0.582439	Local-single	Supervised	A-VAE
173	SPG1_STRSG_Olson_2014	40	3	ndcg	0.826136	Compound-multi	Supervised	A-VAE
174	CAPSD_AAV2S_Sinai_substitutions_2021	20	4	ndcg	0.811611	Local-single	Supervised	A-VAE
175	CAPSD_AAV2S_Sinai_substitutions_2021	80	3	ndcg	0.782397	Compound-multi	Supervised	A-VAE
176	PABP_YEAST_Melamed_2013	160	5	ndcg	0.677136	Local-single	Supervised	A-VAE
177	DLG4_HUMAN_Faure_2021	40	4	ndcg	0.664513	Local-single	Supervised	A-VAE
178	GRB2_HUMAN_Faure_2021	160	2	ndcg	0.619801	Local-single	Supervised	A-VAE
179	PABP_YEAST_Melamed_2013	40	2	ndcg	0.745189	Local-single	Supervised	A-VAE
180	GRB2_HUMAN_Faure_2021	160	4	ndcg	0.477194	Compound-multi	Supervised	A-VAE
181	HIS7_YEAST_Pokusaeva_2019	40	2	ndcg	1.01334	Compound-multi	Supervised	A-VAE
182	A4_HUMAN_Seuma_2021	40	3	ndcg	0.285559	Local-single	Supervised	A-VAE
183	PABP_YEAST_Melamed_2013	40	2	ndcg	0.618198	Compound-multi	Supervised	A-VAE
184	A4_HUMAN_Seuma_2021	80	3	ndcg	0.572303	Compound-multi	Supervised	A-VAE
185	PABP_YEAST_Melamed_2013	20	2	ndcg	0.472135	Local-single	Supervised	A-VAE
186	GRB2_HUMAN_Faure_2021	160	4	ndcg	0.697999	Local-single	Supervised	A-VAE
187	A4_HUMAN_Seuma_2021	40	3	ndcg	0.513915	Compound-multi	Supervised	A-VAE
188	HIS7_YEAST_Pokusaeva_2019	20	2	ndcg	0.152971	Local-single	Supervised	A-VAE
189	PABP_YEAST_Melamed_2013	20	2	ndcg	0.275952	Compound-multi	Supervised	A-VAE
190	A4_HUMAN_Seuma_2021	160	3	ndcg	0.367852	Compound-multi	Supervised	A-VAE
191	PABP_YEAST_Melamed_2013	320	1	ndcg	0.379187	Local-single	Supervised	A-VAE
192	GRB2_HUMAN_Faure_2021	320	4	ndcg	0.392529	Compound-multi	Supervised	A-VAE
193	HIS7_YEAST_Pokusaeva_2019	20	2	ndcg	0.600555	Compound-multi	Supervised	A-VAE
194	A4_HUMAN_Seuma_2021	160	3	ndcg	0.107609	Local-single	Supervised	A-VAE
195	PABP_YEAST_Melamed_2013	320	1	ndcg	0.431113	Compound-multi	Supervised	A-VAE
196	A4_HUMAN_Seuma_2021	320	3	ndcg	0.305907	Compound-multi	Supervised	A-VAE
197	A4_HUMAN_Seuma_2021	80	3	ndcg	0.335832	Local-single	Supervised	A-VAE
198	HIS7_YEAST_Pokusaeva_2019	80	1	ndcg	0.304128	Local-single	Supervised	A-VAE
199	HIS7_YEAST_Pokusaeva_2019	40	2	ndcg	0.348136	Local-single	Supervised	A-VAE
200	PABP_YEAST_Melamed_2013	80	2	ndcg	0.590645	Compound-multi	Supervised	A-VAE
201	GRB2_HUMAN_Faure_2021	40	4	ndcg	0.725078	Compound-multi	Supervised	A-VAE
202	A4_HUMAN_Seuma_2021	80	2	ndcg	0.168745	Local-single	Supervised	A-VAE
203	PABP_YEAST_Melamed_2013	320	2	ndcg	0.490337	Local-single	Supervised	A-VAE
204	HIS7_YEAST_Pokusaeva_2019	20	3	ndcg	0.817539	Compound-multi	Supervised	A-VAE
205	A4_HUMAN_Seuma_2021	160	2	ndcg	0.480495	Compound-multi	Supervised	A-VAE
206	PABP_YEAST_Melamed_2013	320	2	ndcg	0.294975	Compound-multi	Supervised	A-VAE
207	GRB2_HUMAN_Faure_2021	40	4	ndcg	0.774904	Local-single	Supervised	A-VAE
208	A4_HUMAN_Seuma_2021	160	2	ndcg	0.237798	Local-single	Supervised	A-VAE
209	A4_HUMAN_Seuma_2021	20	3	ndcg	0.67719	Local-single	Supervised	A-VAE
210	PABP_YEAST_Melamed_2013	160	2	ndcg	0.584592	Local-single	Supervised	A-VAE
211	A4_HUMAN_Seuma_2021	320	2	ndcg	0.436727	Compound-multi	Supervised	A-VAE
212	GRB2_HUMAN_Faure_2021	80	4	ndcg	0.821993	Compound-multi	Supervised	A-VAE
213	PABP_YEAST_Melamed_2013	160	2	ndcg	0.186448	Compound-multi	Supervised	A-VAE
214	A4_HUMAN_Seuma_2021	320	2	ndcg	0.0385101	Local-single	Supervised	A-VAE
215	PABP_YEAST_Melamed_2013	80	2	ndcg	0.959673	Local-single	Supervised	A-VAE
216	HIS7_YEAST_Pokusaeva_2019	80	2	ndcg	0.530789	Compound-multi	Supervised	A-VAE
217	A4_HUMAN_Seuma_2021	20	3	ndcg	0.189261	Compound-multi	Supervised	A-VAE
218	GRB2_HUMAN_Faure_2021	80	4	ndcg	0.893331	Local-single	Supervised	A-VAE
219	HIS7_YEAST_Pokusaeva_2019	80	2	ndcg	0.177193	Local-single	Supervised	A-VAE
220	GRB2_HUMAN_Faure_2021	320	4	ndcg	0.596261	Local-single	Supervised	A-VAE
221	PABP_YEAST_Melamed_2013	160	1	ndcg	0.77437	Local-single	Supervised	A-VAE
222	A4_HUMAN_Seuma_2021	320	3	ndcg	0.0343157	Local-single	Supervised	A-VAE
223	HIS7_YEAST_Pokusaeva_2019	20	1	ndcg	0.193805	Compound-multi	Supervised	A-VAE
224	A4_HUMAN_Seuma_2021	320	5	ndcg	0.0976319	Local-single	Supervised	A-VAE
225	A4_HUMAN_Seuma_2021	320	4	ndcg	0.475151	Compound-multi	Supervised	A-VAE
226	GRB2_HUMAN_Faure_2021	80	5	ndcg	0.653539	Compound-multi	Supervised	A-VAE
227	A4_HUMAN_Seuma_2021	320	4	ndcg	0.358863	Local-single	Supervised	A-VAE
228	A4_HUMAN_Seuma_2021	320	5	ndcg	0.665037	Compound-multi	Supervised	A-VAE
229	GRB2_HUMAN_Faure_2021	320	5	ndcg	0.732106	Local-single	Supervised	A-VAE
230	A4_HUMAN_Seuma_2021	20	5	ndcg	0.696554	Compound-multi	Supervised	A-VAE
231	A4_HUMAN_Seuma_2021	160	4	ndcg	0.593359	Local-single	Supervised	A-VAE
232	A4_HUMAN_Seuma_2021	160	5	ndcg	0.564053	Local-single	Supervised	A-VAE
233	A4_HUMAN_Seuma_2021	20	5	ndcg	0.190947	Local-single	Supervised	A-VAE
234	GRB2_HUMAN_Faure_2021	80	5	ndcg	0.873447	Local-single	Supervised	A-VAE
235	A4_HUMAN_Seuma_2021	160	5	ndcg	0.465641	Compound-multi	Supervised	A-VAE
236	A4_HUMAN_Seuma_2021	40	5	ndcg	0.522102	Compound-multi	Supervised	A-VAE
237	A4_HUMAN_Seuma_2021	80	5	ndcg	0.62091	Local-single	Supervised	A-VAE
238	GRB2_HUMAN_Faure_2021	160	5	ndcg	0.735576	Local-single	Supervised	A-VAE
239	A4_HUMAN_Seuma_2021	40	5	ndcg	0.246054	Local-single	Supervised	A-VAE
240	GRB2_HUMAN_Faure_2021	160	5	ndcg	0.547957	Compound-multi	Supervised	A-VAE
241	GRB2_HUMAN_Faure_2021	320	5	ndcg	0.58934	Compound-multi	Supervised	A-VAE
242	GRB2_HUMAN_Faure_2021	40	5	ndcg	0.907076	Local-single	Supervised	A-VAE
243	PABP_YEAST_Melamed_2013	20	1	ndcg	0.636903	Compound-multi	Supervised	A-VAE
244	A4_HUMAN_Seuma_2021	160	4	ndcg	0.590755	Compound-multi	Supervised	A-VAE
245	PABP_YEAST_Melamed_2013	160	1	ndcg	0.52761	Compound-multi	Supervised	A-VAE
246	A4_HUMAN_Seuma_2021	20	4	ndcg	0.888316	Compound-multi	Supervised	A-VAE
247	HIS7_YEAST_Pokusaeva_2019	80	1	ndcg	0.194121	Compound-multi	Supervised	A-VAE
248	GRB2_HUMAN_Faure_2021	20	5	ndcg	0.137567	Compound-multi	Supervised	A-VAE
249	A4_HUMAN_Seuma_2021	20	4	ndcg	0.983867	Local-single	Supervised	A-VAE
250	PABP_YEAST_Melamed_2013	80	1	ndcg	0.735625	Local-single	Supervised	A-VAE
251	HIS7_YEAST_Pokusaeva_2019	40	1	ndcg	0.640719	Local-single	Supervised	A-VAE
252	A4_HUMAN_Seuma_2021	40	4	ndcg	0.788362	Compound-multi	Supervised	A-VAE
253	PABP_YEAST_Melamed_2013	80	1	ndcg	0.815829	Compound-multi	Supervised	A-VAE
254	A4_HUMAN_Seuma_2021	40	4	ndcg	0.746832	Local-single	Supervised	A-VAE
255	GRB2_HUMAN_Faure_2021	20	5	ndcg	0.944367	Local-single	Supervised	A-VAE
256	PABP_YEAST_Melamed_2013	40	1	ndcg	0.919188	Local-single	Supervised	A-VAE
257	HIS7_YEAST_Pokusaeva_2019	40	1	ndcg	0.887345	Compound-multi	Supervised	A-VAE
258	A4_HUMAN_Seuma_2021	80	4	ndcg	0.521774	Compound-multi	Supervised	A-VAE
259	PABP_YEAST_Melamed_2013	40	1	ndcg	0.615024	Compound-multi	Supervised	A-VAE
260	GRB2_HUMAN_Faure_2021	40	5	ndcg	0.45178	Compound-multi	Supervised	A-VAE
261	A4_HUMAN_Seuma_2021	80	4	ndcg	0.685851	Local-single	Supervised	A-VAE
262	PABP_YEAST_Melamed_2013	20	1	ndcg	0.825639	Local-single	Supervised	A-VAE
263	HIS7_YEAST_Pokusaeva_2019	20	1	ndcg	0.509706	Local-single	Supervised	A-VAE
264	A4_HUMAN_Seuma_2021	80	2	ndcg	0.656563	Compound-multi	Supervised	A-VAE
265	PABP_YEAST_Melamed_2013	20	3	ndcg	0.500494	Compound-multi	Supervised	A-VAE
266	HIS7_YEAST_Pokusaeva_2019	20	3	ndcg	0.82578	Local-single	Supervised	A-VAE
267	A4_HUMAN_Seuma_2021	40	2	ndcg	0.861343	Local-single	Supervised	A-VAE
268	GRB2_HUMAN_Faure_2021	20	3	ndcg	0.71999	Local-single	Supervised	A-VAE
269	DLG4_HUMAN_Faure_2021	40	5	ndcg	0.532441	Compound-multi	Supervised	A-VAE
270	PABP_YEAST_Melamed_2013	320	4	ndcg	0.533448	Local-single	Supervised	A-VAE
271	HIS7_YEAST_Pokusaeva_2019	20	5	ndcg	0.842844	Local-single	Supervised	A-VAE
272	DLG4_HUMAN_Faure_2021	40	5	ndcg	0.805753	Local-single	Supervised	A-VAE
273	PABP_YEAST_Melamed_2013	320	4	ndcg	0.515569	Compound-multi	Supervised	A-VAE
274	GRB2_HUMAN_Faure_2021	40	3	ndcg	0.0250031	Compound-multi	Supervised	A-VAE
275	DLG4_HUMAN_Faure_2021	80	5	ndcg	0.722219	Compound-multi	Supervised	A-VAE
276	DLG4_HUMAN_Faure_2021	20	5	ndcg	0.684898	Local-single	Supervised	A-VAE
277	HIS7_YEAST_Pokusaeva_2019	20	5	ndcg	0.859298	Compound-multi	Supervised	A-VAE
278	DLG4_HUMAN_Faure_2021	80	5	ndcg	0.713983	Local-single	Supervised	A-VAE
279	PABP_YEAST_Melamed_2013	160	4	ndcg	0.338173	Compound-multi	Supervised	A-VAE
280	GRB2_HUMAN_Faure_2021	40	3	ndcg	0.80218	Local-single	Supervised	A-VAE
281	HIS7_YEAST_Pokusaeva_2019	80	4	ndcg	0.364572	Local-single	Supervised	A-VAE
282	DLG4_HUMAN_Faure_2021	160	5	ndcg	0.804152	Compound-multi	Supervised	A-VAE
283	PABP_YEAST_Melamed_2013	80	4	ndcg	0.722797	Local-single	Supervised	A-VAE
284	DLG4_HUMAN_Faure_2021	160	5	ndcg	0.616436	Local-single	Supervised	A-VAE
285	GRB2_HUMAN_Faure_2021	80	3	ndcg	0.493165	Compound-multi	Supervised	A-VAE
286	PABP_YEAST_Melamed_2013	160	4	ndcg	0.626205	Local-single	Supervised	A-VAE
287	PABP_YEAST_Melamed_2013	20	5	ndcg	0.511625	Compound-multi	Supervised	A-VAE
288	HIS7_YEAST_Pokusaeva_2019	40	5	ndcg	0.543232	Compound-multi	Supervised	A-VAE
289	DLG4_HUMAN_Faure_2021	20	5	ndcg	0.866591	Compound-multi	Supervised	A-VAE
290	SPG1_STRSG_Olson_2014	20	1	ndcg	0.836573	Compound-multi	Supervised	A-VAE
291	DLG4_HUMAN_Faure_2021	80	4	ndcg	0.365203	Compound-multi	Supervised	A-VAE
292	PABP_YEAST_Melamed_2013	160	5	ndcg	0.286626	Compound-multi	Supervised	A-VAE
293	DLG4_HUMAN_Faure_2021	80	4	ndcg	0.704477	Local-single	Supervised	A-VAE
294	PABP_YEAST_Melamed_2013	80	5	ndcg	0.500017	Local-single	Supervised	A-VAE
295	HIS7_YEAST_Pokusaeva_2019	80	5	ndcg	0.305051	Local-single	Supervised	A-VAE
296	GRB2_HUMAN_Faure_2021	320	2	ndcg	0.759341	Compound-multi	Supervised	A-VAE
297	DLG4_HUMAN_Faure_2021	160	4	ndcg	0.377546	Compound-multi	Supervised	A-VAE
298	PABP_YEAST_Melamed_2013	80	5	ndcg	0.26339	Compound-multi	Supervised	A-VAE
299	HIS7_YEAST_Pokusaeva_2019	80	5	ndcg	0.719861	Compound-multi	Supervised	A-VAE
300	DLG4_HUMAN_Faure_2021	160	4	ndcg	0.605913	Local-single	Supervised	A-VAE
301	GRB2_HUMAN_Faure_2021	320	2	ndcg	0.728929	Local-single	Supervised	A-VAE
302	PABP_YEAST_Melamed_2013	40	5	ndcg	0.634571	Local-single	Supervised	A-VAE
303	DLG4_HUMAN_Faure_2021	320	4	ndcg	0.535907	Compound-multi	Supervised	A-VAE
304	PABP_YEAST_Melamed_2013	40	5	ndcg	0.342626	Compound-multi	Supervised	A-VAE
305	HIS7_YEAST_Pokusaeva_2019	40	5	ndcg	0.582568	Local-single	Supervised	A-VAE
306	DLG4_HUMAN_Faure_2021	320	4	ndcg	0.717765	Local-single	Supervised	A-VAE
307	GRB2_HUMAN_Faure_2021	20	3	ndcg	0.84118	Compound-multi	Supervised	A-VAE
308	PABP_YEAST_Melamed_2013	20	5	ndcg	0.438949	Local-single	Supervised	A-VAE
309	HIS7_YEAST_Pokusaeva_2019	80	4	ndcg	0.00601019	Compound-multi	Supervised	A-VAE
310	YAP1_HUMAN_Araya_2012	80	2	ndcg	0.264444	Compound-multi	Supervised	A-VAE
311	PABP_YEAST_Melamed_2013	80	4	ndcg	0.540579	Compound-multi	Supervised	A-VAE
312	PABP_YEAST_Melamed_2013	40	4	ndcg	0.781423	Local-single	Supervised	A-VAE
313	PABP_YEAST_Melamed_2013	160	3	ndcg	0.764086	Compound-multi	Supervised	A-VAE
314	A4_HUMAN_Seuma_2021	160	1	ndcg	0.366216	Local-single	Supervised	A-VAE
315	A4_HUMAN_Seuma_2021	320	1	ndcg	0.459899	Compound-multi	Supervised	A-VAE
316	GRB2_HUMAN_Faure_2021	320	3	ndcg	0.642687	Local-single	Supervised	A-VAE
317	PABP_YEAST_Melamed_2013	80	3	ndcg	0.670848	Local-single	Supervised	A-VAE
318	HIS7_YEAST_Pokusaeva_2019	80	3	ndcg	0.460462	Compound-multi	Supervised	A-VAE
319	A4_HUMAN_Seuma_2021	320	1	ndcg	0.00439259	Local-single	Supervised	A-VAE
320	PABP_YEAST_Melamed_2013	80	3	ndcg	0.707456	Compound-multi	Supervised	A-VAE
321	HIS7_YEAST_Pokusaeva_2019	80	3	ndcg	0.272807	Local-single	Supervised	A-VAE
322	A4_HUMAN_Seuma_2021	20	2	ndcg	0.774783	Compound-multi	Supervised	A-VAE
323	PABP_YEAST_Melamed_2013	40	3	ndcg	0.662247	Local-single	Supervised	A-VAE
324	HIS7_YEAST_Pokusaeva_2019	40	3	ndcg	0.684759	Local-single	Supervised	A-VAE
325	A4_HUMAN_Seuma_2021	20	2	ndcg	0.907971	Local-single	Supervised	A-VAE
326	PABP_YEAST_Melamed_2013	40	3	ndcg	0.303996	Compound-multi	Supervised	A-VAE
327	A4_HUMAN_Seuma_2021	40	2	ndcg	0.697039	Compound-multi	Supervised	A-VAE
328	HIS7_YEAST_Pokusaeva_2019	40	3	ndcg	0.309012	Compound-multi	Supervised	A-VAE
329	GRB2_HUMAN_Faure_2021	20	4	ndcg	0.789132	Local-single	Supervised	A-VAE
330	PABP_YEAST_Melamed_2013	20	3	ndcg	0.677905	Local-single	Supervised	A-VAE
331	GRB2_HUMAN_Faure_2021	20	4	ndcg	0.842949	Compound-multi	Supervised	A-VAE
332	GRB2_HUMAN_Faure_2021	320	3	ndcg	0.527194	Compound-multi	Supervised	A-VAE
333	A4_HUMAN_Seuma_2021	160	1	ndcg	0.583733	Compound-multi	Supervised	A-VAE
334	PABP_YEAST_Melamed_2013	160	3	ndcg	0.740271	Local-single	Supervised	A-VAE
335	DLG4_HUMAN_Faure_2021	320	5	ndcg	0.664542	Local-single	Supervised	A-VAE
336	HIS7_YEAST_Pokusaeva_2019	40	4	ndcg	0.378935	Local-single	Supervised	A-VAE
337	GRB2_HUMAN_Faure_2021	80	3	ndcg	0.621666	Local-single	Supervised	A-VAE
338	A4_HUMAN_Seuma_2021	20	1	ndcg	0.913054	Compound-multi	Supervised	A-VAE
339	PABP_YEAST_Melamed_2013	40	4	ndcg	0.556128	Compound-multi	Supervised	A-VAE
340	A4_HUMAN_Seuma_2021	20	1	ndcg	0.786895	Local-single	Supervised	A-VAE
341	PABP_YEAST_Melamed_2013	20	4	ndcg	0.904417	Local-single	Supervised	A-VAE
342	HIS7_YEAST_Pokusaeva_2019	40	4	ndcg	0.695207	Compound-multi	Supervised	A-VAE
343	A4_HUMAN_Seuma_2021	40	1	ndcg	0.776992	Compound-multi	Supervised	A-VAE
344	GRB2_HUMAN_Faure_2021	160	3	ndcg	0.497064	Compound-multi	Supervised	A-VAE
345	PABP_YEAST_Melamed_2013	20	4	ndcg	0.900449	Compound-multi	Supervised	A-VAE
346	A4_HUMAN_Seuma_2021	40	1	ndcg	0.711384	Local-single	Supervised	A-VAE
347	HIS7_YEAST_Pokusaeva_2019	20	4	ndcg	0.659284	Local-single	Supervised	A-VAE
348	PABP_YEAST_Melamed_2013	320	3	ndcg	0.670928	Local-single	Supervised	A-VAE
349	GRB2_HUMAN_Faure_2021	160	3	ndcg	0.593673	Local-single	Supervised	A-VAE
350	A4_HUMAN_Seuma_2021	80	1	ndcg	0.70969	Compound-multi	Supervised	A-VAE
351	PABP_YEAST_Melamed_2013	320	3	ndcg	0.330164	Compound-multi	Supervised	A-VAE
352	HIS7_YEAST_Pokusaeva_2019	20	4	ndcg	0.230179	Compound-multi	Supervised	A-VAE
353	A4_HUMAN_Seuma_2021	80	1	ndcg	0.463019	Local-single	Supervised	A-VAE
354	DLG4_HUMAN_Faure_2021	320	5	ndcg	0.649191	Compound-multi	Supervised	A-VAE
355	GFP_AEQVI_Sarkisyan_2016	20	1	ndcg	0.783919	Compound-multi	Supervised	A-VAE
356	A4_HUMAN_Seuma_2021	80	5	ndcg	0.531265	Compound-multi	Supervised	A-VAE
357	SPG1_STRSG_Olson_2014	160	5	ndcg	0.415149	Compound-multi	Supervised	A-VAE
358	YAP1_HUMAN_Araya_2012	80	1	ndcg	0.647506	Local-single	Supervised	A-VAE
359	GFP_AEQVI_Sarkisyan_2016	80	4	ndcg	0.482937	Compound-multi	Supervised	A-VAE
360	GFP_AEQVI_Sarkisyan_2016	320	3	ndcg	0.647432	Local-single	Supervised	A-VAE
361	GFP_AEQVI_Sarkisyan_2016	160	4	ndcg	0.550417	Compound-multi	Supervised	A-VAE
362	GFP_AEQVI_Sarkisyan_2016	40	4	ndcg	0.764454	Compound-multi	Supervised	A-VAE
363	SPG1_STRSG_Olson_2014	40	5	ndcg	0.544126	Compound-multi	Supervised	A-VAE
364	GFP_AEQVI_Sarkisyan_2016	20	2	ndcg	0.474849	Compound-multi	Supervised	A-VAE
365	F7YBW8_MESOW_Aakre_2015	20	3	ndcg	0.790109	Local-single	Supervised	A-VAE
366	GFP_AEQVI_Sarkisyan_2016	160	1	ndcg	0.638976	Compound-multi	Supervised	A-VAE
367	GFP_AEQVI_Sarkisyan_2016	80	4	ndcg	0.742578	Local-single	Supervised	A-VAE
368	GCN4_YEAST_Staller_induction_2018	20	3	ndcg	0.555701	Local-single	Supervised	A-VAE
369	GFP_AEQVI_Sarkisyan_2016	160	3	ndcg	0.58889	Compound-multi	Supervised	A-VAE
370	F7YBW8_MESOW_Aakre_2015	20	5	ndcg	0.524757	Compound-multi	Supervised	A-VAE
371	F7YBW8_MESOW_Aakre_2015	20	4	ndcg	0.784511	Compound-multi	Supervised	A-VAE
372	F7YBW8_MESOW_Aakre_2015	20	2	ndcg	0.847044	Compound-multi	Supervised	A-VAE
373	F7YBW8_MESOW_Aakre_2015	20	1	ndcg	0.584471	Compound-multi	Supervised	A-VAE
374	GFP_AEQVI_Sarkisyan_2016	160	2	ndcg	0.582258	Compound-multi	Supervised	A-VAE
375	GFP_AEQVI_Sarkisyan_2016	40	2	ndcg	0.557773	Compound-multi	Supervised	A-VAE
376	GCN4_YEAST_Staller_induction_2018	20	1	ndcg	0.623351	Local-single	Supervised	A-VAE
377	SPG1_STRSG_Olson_2014	80	4	ndcg	0.704368	Local-single	Supervised	A-VAE
378	GFP_AEQVI_Sarkisyan_2016	80	2	ndcg	0.56194	Compound-multi	Supervised	A-VAE
379	YAP1_HUMAN_Araya_2012	20	1	ndcg	0.788894	Local-single	Supervised	A-VAE
380	SPG1_STRSG_Olson_2014	160	5	ndcg	0.280775	Local-single	Supervised	A-VAE
381	GFP_AEQVI_Sarkisyan_2016	320	2	ndcg	0.591645	Compound-multi	Supervised	A-VAE
382	GFP_AEQVI_Sarkisyan_2016	40	1	ndcg	0.805681	Compound-multi	Supervised	A-VAE
383	F7YBW8_MESOW_Aakre_2015	20	4	ndcg	0.848354	Local-single	Supervised	A-VAE
384	GFP_AEQVI_Sarkisyan_2016	40	2	ndcg	0.77052	Local-single	Supervised	A-VAE
385	YAP1_HUMAN_Araya_2012	40	1	ndcg	0.675578	Compound-multi	Supervised	A-VAE
386	F7YBW8_MESOW_Aakre_2015	20	1	ndcg	0.736625	Local-single	Supervised	A-VAE
387	GFP_AEQVI_Sarkisyan_2016	320	1	ndcg	0.476757	Local-single	Supervised	A-VAE
388	YAP1_HUMAN_Araya_2012	40	2	ndcg	0.498741	Compound-multi	Supervised	A-VAE
389	SPG1_STRSG_Olson_2014	20	5	ndcg	0.619395	Compound-multi	Supervised	A-VAE
390	SPG1_STRSG_Olson_2014	80	5	ndcg	0.791325	Compound-multi	Supervised	A-VAE
391	GFP_AEQVI_Sarkisyan_2016	20	3	ndcg	0.746687	Compound-multi	Supervised	A-VAE
392	GFP_AEQVI_Sarkisyan_2016	160	1	ndcg	0.712078	Local-single	Supervised	A-VAE
393	GCN4_YEAST_Staller_induction_2018	20	5	ndcg	0.643128	Local-single	Supervised	A-VAE
394	YAP1_HUMAN_Araya_2012	80	1	ndcg	0.288908	Compound-multi	Supervised	A-VAE
395	SPG1_STRSG_Olson_2014	320	4	ndcg	0.694335	Local-single	Supervised	A-VAE
396	GFP_AEQVI_Sarkisyan_2016	80	3	ndcg	0.300373	Local-single	Supervised	A-VAE
397	SPG1_STRSG_Olson_2014	320	4	ndcg	0.742662	Compound-multi	Supervised	A-VAE
398	YAP1_HUMAN_Araya_2012	20	2	ndcg	0.208729	Compound-multi	Supervised	A-VAE
399	F7YBW8_MESOW_Aakre_2015	20	3	ndcg	0.766892	Compound-multi	Supervised	A-VAE
400	GFP_AEQVI_Sarkisyan_2016	80	1	ndcg	0.573007	Compound-multi	Supervised	A-VAE
401	GFP_AEQVI_Sarkisyan_2016	80	2	ndcg	0.70081	Local-single	Supervised	A-VAE
402	YAP1_HUMAN_Araya_2012	160	1	ndcg	0.528965	Local-single	Supervised	A-VAE
403	YAP1_HUMAN_Araya_2012	40	2	ndcg	0.877259	Local-single	Supervised	A-VAE
404	GCN4_YEAST_Staller_induction_2018	20	4	ndcg	0.638908	Local-single	Supervised	A-VAE
405	GFP_AEQVI_Sarkisyan_2016	40	4	ndcg	0.790737	Local-single	Supervised	A-VAE
406	GFP_AEQVI_Sarkisyan_2016	160	2	ndcg	0.584827	Local-single	Supervised	A-VAE
407	YAP1_HUMAN_Araya_2012	40	1	ndcg	0.671315	Local-single	Supervised	A-VAE
408	SPG1_STRSG_Olson_2014	160	4	ndcg	0.764091	Compound-multi	Supervised	A-VAE
409	SPG1_STRSG_Olson_2014	80	5	ndcg	0.860506	Local-single	Supervised	A-VAE
410	GFP_AEQVI_Sarkisyan_2016	320	3	ndcg	0.333811	Compound-multi	Supervised	A-VAE
411	SPG1_STRSG_Olson_2014	320	5	ndcg	0.0638215	Compound-multi	Supervised	A-VAE
412	GFP_AEQVI_Sarkisyan_2016	40	3	ndcg	0.630288	Local-single	Supervised	A-VAE
413	F7YBW8_MESOW_Aakre_2015	20	5	ndcg	0.949474	Local-single	Supervised	A-VAE
414	F7YBW8_MESOW_Aakre_2015	20	2	ndcg	0.833227	Local-single	Supervised	A-VAE
415	YAP1_HUMAN_Araya_2012	160	1	ndcg	0.364589	Compound-multi	Supervised	A-VAE
416	GFP_AEQVI_Sarkisyan_2016	20	4	ndcg	0.698891	Local-single	Supervised	A-VAE
417	GFP_AEQVI_Sarkisyan_2016	160	3	ndcg	0.729729	Local-single	Supervised	A-VAE
418	SPG1_STRSG_Olson_2014	320	5	ndcg	0.383978	Local-single	Supervised	A-VAE
419	SPG1_STRSG_Olson_2014	20	5	ndcg	0.7641	Local-single	Supervised	A-VAE
420	GCN4_YEAST_Staller_induction_2018	20	2	ndcg	0.650945	Local-single	Supervised	A-VAE
421	GFP_AEQVI_Sarkisyan_2016	20	2	ndcg	0.893067	Local-single	Supervised	A-VAE
422	GFP_AEQVI_Sarkisyan_2016	80	1	ndcg	0.555783	Local-single	Supervised	A-VAE
423	GFP_AEQVI_Sarkisyan_2016	160	4	ndcg	0.698018	Local-single	Supervised	A-VAE
424	SPG1_STRSG_Olson_2014	40	5	ndcg	0.758174	Local-single	Supervised	A-VAE
425	GFP_AEQVI_Sarkisyan_2016	20	4	ndcg	0.926575	Compound-multi	Supervised	A-VAE
426	SPG1_STRSG_Olson_2014	160	4	ndcg	0.80627	Local-single	Supervised	A-VAE
427	GFP_AEQVI_Sarkisyan_2016	320	1	ndcg	0.636001	Compound-multi	Supervised	A-VAE
428	GFP_AEQVI_Sarkisyan_2016	40	3	ndcg	0.281951	Compound-multi	Supervised	A-VAE
429	GFP_AEQVI_Sarkisyan_2016	40	1	ndcg	0.621132	Local-single	Supervised	A-VAE
430	YAP1_HUMAN_Araya_2012	20	1	ndcg	0.490645	Compound-multi	Supervised	A-VAE
431	YAP1_HUMAN_Araya_2012	20	2	ndcg	0.981807	Local-single	Supervised	A-VAE
432	GFP_AEQVI_Sarkisyan_2016	20	1	ndcg	0.858026	Local-single	Supervised	A-VAE
433	GFP_AEQVI_Sarkisyan_2016	20	3	ndcg	0.463583	Local-single	Supervised	A-VAE
434	GFP_AEQVI_Sarkisyan_2016	320	2	ndcg	0.523374	Local-single	Supervised	A-VAE
435	HIS7_YEAST_Pokusaeva_2019	20	5	ndcg	0.923562	Compound-multi	Zero Shot	AlphaMissense
436	YAP1_HUMAN_Araya_2012	80	1	ndcg	0.129047	Compound-multi	Zero Shot	AlphaMissense
437	PABP_YEAST_Melamed_2013	160	4	ndcg	0.702769	Local-single	Zero Shot	AlphaMissense
438	DLG4_HUMAN_Faure_2021	320	5	ndcg	0.704161	Compound-multi	Zero Shot	AlphaMissense
439	SPG1_STRSG_Olson_2014	320	4	ndcg	0.659823	Local-single	Zero Shot	AlphaMissense
440	DLG4_HUMAN_Faure_2021	20	2	ndcg	0.419609	Compound-multi	Zero Shot	AlphaMissense
441	CAPSD_AAV2S_Sinai_substitutions_2021	20	3	ndcg	0.31654	Local-single	Zero Shot	AlphaMissense
442	DLG4_HUMAN_Faure_2021	160	1	ndcg	0.50144	Compound-multi	Zero Shot	AlphaMissense
443	A4_HUMAN_Seuma_2021	80	4	ndcg	0.150113	Local-single	Zero Shot	AlphaMissense
444	PABP_YEAST_Melamed_2013	80	4	ndcg	0.412845	Compound-multi	Zero Shot	AlphaMissense
445	HIS7_YEAST_Pokusaeva_2019	80	4	ndcg	0.430728	Compound-multi	Zero Shot	AlphaMissense
446	DLG4_HUMAN_Faure_2021	160	5	ndcg	0.731527	Compound-multi	Zero Shot	AlphaMissense
447	DLG4_HUMAN_Faure_2021	320	5	ndcg	0.666781	Local-single	Zero Shot	AlphaMissense
448	GFP_AEQVI_Sarkisyan_2016	160	1	ndcg	0.790635	Local-single	Zero Shot	AlphaMissense
449	F7YBW8_MESOW_Aakre_2015	20	3	ndcg	0.753389	Local-single	Zero Shot	AlphaMissense
450	GRB2_HUMAN_Faure_2021	80	1	ndcg	0.510675	Compound-multi	Zero Shot	AlphaMissense
451	DLG4_HUMAN_Faure_2021	80	5	ndcg	0.609749	Local-single	Zero Shot	AlphaMissense
452	CAPSD_AAV2S_Sinai_substitutions_2021	320	2	ndcg	0.216301	Compound-multi	Zero Shot	AlphaMissense
453	A4_HUMAN_Seuma_2021	320	5	ndcg	0.259006	Compound-multi	Zero Shot	AlphaMissense
454	DLG4_HUMAN_Faure_2021	160	5	ndcg	0.690398	Local-single	Zero Shot	AlphaMissense
455	HIS7_YEAST_Pokusaeva_2019	80	4	ndcg	0.00847499	Local-single	Zero Shot	AlphaMissense
456	DLG4_HUMAN_Faure_2021	320	1	ndcg	0.655904	Local-single	Zero Shot	AlphaMissense
457	GRB2_HUMAN_Faure_2021	40	5	ndcg	0.404869	Compound-multi	Zero Shot	AlphaMissense
458	CAPSD_AAV2S_Sinai_substitutions_2021	20	3	ndcg	0.284036	Compound-multi	Zero Shot	AlphaMissense
459	GRB2_HUMAN_Faure_2021	40	3	ndcg	0.447022	Local-single	Zero Shot	AlphaMissense
460	DLG4_HUMAN_Faure_2021	320	1	ndcg	0.420752	Compound-multi	Zero Shot	AlphaMissense
461	GFP_AEQVI_Sarkisyan_2016	80	2	ndcg	0.793106	Local-single	Zero Shot	AlphaMissense
462	GRB2_HUMAN_Faure_2021	80	1	ndcg	0.718433	Local-single	Zero Shot	AlphaMissense
463	SPG1_STRSG_Olson_2014	80	2	ndcg	0.391232	Local-single	Zero Shot	AlphaMissense
464	DLG4_HUMAN_Faure_2021	160	1	ndcg	0.610198	Local-single	Zero Shot	AlphaMissense
465	CAPSD_AAV2S_Sinai_substitutions_2021	320	2	ndcg	0.465647	Local-single	Zero Shot	AlphaMissense
466	GRB2_HUMAN_Faure_2021	80	3	ndcg	0.406078	Compound-multi	Zero Shot	AlphaMissense
467	SPG1_STRSG_Olson_2014	80	2	ndcg	0.385787	Compound-multi	Zero Shot	AlphaMissense
468	SPG1_STRSG_Olson_2014	320	5	ndcg	0.50442	Local-single	Zero Shot	AlphaMissense
469	HIS7_YEAST_Pokusaeva_2019	40	1	ndcg	0.787043	Compound-multi	Zero Shot	AlphaMissense
470	GRB2_HUMAN_Faure_2021	320	5	ndcg	0.657118	Local-single	Zero Shot	AlphaMissense
471	PABP_YEAST_Melamed_2013	160	4	ndcg	0.449612	Compound-multi	Zero Shot	AlphaMissense
472	PABP_YEAST_Melamed_2013	80	4	ndcg	0.908305	Local-single	Zero Shot	AlphaMissense
473	GRB2_HUMAN_Faure_2021	160	2	ndcg	0.610758	Local-single	Zero Shot	AlphaMissense
474	SPG1_STRSG_Olson_2014	160	2	ndcg	0.466587	Compound-multi	Zero Shot	AlphaMissense
475	SPG1_STRSG_Olson_2014	320	4	ndcg	0.632783	Compound-multi	Zero Shot	AlphaMissense
476	GRB2_HUMAN_Faure_2021	160	3	ndcg	0.523011	Local-single	Zero Shot	AlphaMissense
477	CAPSD_AAV2S_Sinai_substitutions_2021	160	3	ndcg	0.371054	Compound-multi	Zero Shot	AlphaMissense
478	HIS7_YEAST_Pokusaeva_2019	20	4	ndcg	0.578033	Local-single	Zero Shot	AlphaMissense
479	GRB2_HUMAN_Faure_2021	20	1	ndcg	0.966486	Local-single	Zero Shot	AlphaMissense
480	A4_HUMAN_Seuma_2021	80	1	ndcg	0.0979479	Compound-multi	Zero Shot	AlphaMissense
481	PABP_YEAST_Melamed_2013	40	1	ndcg	0.824259	Local-single	Zero Shot	AlphaMissense
482	SPG1_STRSG_Olson_2014	320	2	ndcg	0.599611	Local-single	Zero Shot	AlphaMissense
483	PABP_YEAST_Melamed_2013	320	3	ndcg	0.54565	Local-single	Zero Shot	AlphaMissense
484	GRB2_HUMAN_Faure_2021	80	5	ndcg	0.878774	Local-single	Zero Shot	AlphaMissense
485	YAP1_HUMAN_Araya_2012	160	1	ndcg	0.0830054	Compound-multi	Zero Shot	AlphaMissense
486	A4_HUMAN_Seuma_2021	80	1	ndcg	0.230985	Local-single	Zero Shot	AlphaMissense
487	CAPSD_AAV2S_Sinai_substitutions_2021	160	3	ndcg	0.539092	Local-single	Zero Shot	AlphaMissense
488	A4_HUMAN_Seuma_2021	40	1	ndcg	0.347435	Local-single	Zero Shot	AlphaMissense
489	YAP1_HUMAN_Araya_2012	160	5	ndcg	0.110574	Local-single	Zero Shot	AlphaMissense
490	PABP_YEAST_Melamed_2013	320	3	ndcg	0.341617	Compound-multi	Zero Shot	AlphaMissense
491	GRB2_HUMAN_Faure_2021	320	3	ndcg	0.62959	Compound-multi	Zero Shot	AlphaMissense
492	HIS7_YEAST_Pokusaeva_2019	20	4	ndcg	0.336543	Compound-multi	Zero Shot	AlphaMissense
493	A4_HUMAN_Seuma_2021	160	1	ndcg	0.257491	Compound-multi	Zero Shot	AlphaMissense
494	SPG1_STRSG_Olson_2014	20	3	ndcg	0.318545	Compound-multi	Zero Shot	AlphaMissense
495	YAP1_HUMAN_Araya_2012	160	5	ndcg	0.0767178	Compound-multi	Zero Shot	AlphaMissense
496	GFP_AEQVI_Sarkisyan_2016	160	2	ndcg	0.73239	Local-single	Zero Shot	AlphaMissense
497	CAPSD_AAV2S_Sinai_substitutions_2021	320	3	ndcg	0.353565	Compound-multi	Zero Shot	AlphaMissense
498	GRB2_HUMAN_Faure_2021	20	1	ndcg	0.290827	Compound-multi	Zero Shot	AlphaMissense
499	PABP_YEAST_Melamed_2013	160	3	ndcg	0.70845	Local-single	Zero Shot	AlphaMissense
500	A4_HUMAN_Seuma_2021	20	5	ndcg	0.48841	Local-single	Zero Shot	AlphaMissense
501	A4_HUMAN_Seuma_2021	160	1	ndcg	0.319526	Local-single	Zero Shot	AlphaMissense
502	SPG1_STRSG_Olson_2014	80	5	ndcg	0.879087	Local-single	Zero Shot	AlphaMissense
503	A4_HUMAN_Seuma_2021	160	5	ndcg	0.604494	Local-single	Zero Shot	AlphaMissense
504	DLG4_HUMAN_Faure_2021	20	1	ndcg	0.801612	Local-single	Zero Shot	AlphaMissense
505	GFP_AEQVI_Sarkisyan_2016	160	1	ndcg	0.728735	Compound-multi	Zero Shot	AlphaMissense
506	CAPSD_AAV2S_Sinai_substitutions_2021	80	3	ndcg	0.43369	Local-single	Zero Shot	AlphaMissense
507	SPG1_STRSG_Olson_2014	80	5	ndcg	0.872558	Compound-multi	Zero Shot	AlphaMissense
508	DLG4_HUMAN_Faure_2021	80	1	ndcg	0.748426	Local-single	Zero Shot	AlphaMissense
509	GRB2_HUMAN_Faure_2021	80	3	ndcg	0.648993	Local-single	Zero Shot	AlphaMissense
510	PABP_YEAST_Melamed_2013	40	4	ndcg	0.758288	Local-single	Zero Shot	AlphaMissense
511	CAPSD_AAV2S_Sinai_substitutions_2021	40	3	ndcg	0.860482	Compound-multi	Zero Shot	AlphaMissense
512	A4_HUMAN_Seuma_2021	20	1	ndcg	0.650881	Compound-multi	Zero Shot	AlphaMissense
513	GFP_AEQVI_Sarkisyan_2016	320	3	ndcg	0.830731	Local-single	Zero Shot	AlphaMissense
514	HIS7_YEAST_Pokusaeva_2019	40	4	ndcg	0.325951	Local-single	Zero Shot	AlphaMissense
515	GRB2_HUMAN_Faure_2021	40	1	ndcg	0.859108	Local-single	Zero Shot	AlphaMissense
516	DLG4_HUMAN_Faure_2021	80	1	ndcg	0.366027	Compound-multi	Zero Shot	AlphaMissense
517	GCN4_YEAST_Staller_induction_2018	20	3	ndcg	0.517984	Local-single	Zero Shot	AlphaMissense
518	PABP_YEAST_Melamed_2013	40	4	ndcg	0.866639	Compound-multi	Zero Shot	AlphaMissense
519	CAPSD_AAV2S_Sinai_substitutions_2021	40	3	ndcg	0.572078	Local-single	Zero Shot	AlphaMissense
520	A4_HUMAN_Seuma_2021	20	1	ndcg	0.307445	Local-single	Zero Shot	AlphaMissense
521	YAP1_HUMAN_Araya_2012	80	1	ndcg	0.350589	Local-single	Zero Shot	AlphaMissense
522	GFP_AEQVI_Sarkisyan_2016	80	4	ndcg	0.743927	Compound-multi	Zero Shot	AlphaMissense
523	DLG4_HUMAN_Faure_2021	40	1	ndcg	0.66607	Local-single	Zero Shot	AlphaMissense
524	A4_HUMAN_Seuma_2021	80	4	ndcg	0.0339137	Compound-multi	Zero Shot	AlphaMissense
525	GRB2_HUMAN_Faure_2021	160	3	ndcg	0.67564	Compound-multi	Zero Shot	AlphaMissense
526	PABP_YEAST_Melamed_2013	20	4	ndcg	0.229524	Local-single	Zero Shot	AlphaMissense
527	CAPSD_AAV2S_Sinai_substitutions_2021	80	3	ndcg	0.655679	Compound-multi	Zero Shot	AlphaMissense
528	GFP_AEQVI_Sarkisyan_2016	160	2	ndcg	0.572294	Compound-multi	Zero Shot	AlphaMissense
529	GRB2_HUMAN_Faure_2021	40	1	ndcg	0.346568	Compound-multi	Zero Shot	AlphaMissense
530	A4_HUMAN_Seuma_2021	40	1	ndcg	0.258951	Compound-multi	Zero Shot	AlphaMissense
531	DLG4_HUMAN_Faure_2021	40	1	ndcg	0.579001	Compound-multi	Zero Shot	AlphaMissense
532	HIS7_YEAST_Pokusaeva_2019	40	4	ndcg	0.503717	Compound-multi	Zero Shot	AlphaMissense
533	SPG1_STRSG_Olson_2014	320	2	ndcg	0.658416	Compound-multi	Zero Shot	AlphaMissense
534	F7YBW8_MESOW_Aakre_2015	20	3	ndcg	0.550967	Compound-multi	Zero Shot	AlphaMissense
535	PABP_YEAST_Melamed_2013	20	4	ndcg	0.861669	Compound-multi	Zero Shot	AlphaMissense
536	A4_HUMAN_Seuma_2021	20	5	ndcg	0.138461	Compound-multi	Zero Shot	AlphaMissense
537	SPG1_STRSG_Olson_2014	160	2	ndcg	0.409808	Local-single	Zero Shot	AlphaMissense
538	GRB2_HUMAN_Faure_2021	80	5	ndcg	0.594494	Compound-multi	Zero Shot	AlphaMissense
539	CAPSD_AAV2S_Sinai_substitutions_2021	160	2	ndcg	0.449585	Local-single	Zero Shot	AlphaMissense
540	CAPSD_AAV2S_Sinai_substitutions_2021	160	1	ndcg	0.546561	Compound-multi	Zero Shot	AlphaMissense
541	SPG1_STRSG_Olson_2014	160	1	ndcg	0.489956	Compound-multi	Zero Shot	AlphaMissense
542	DLG4_HUMAN_Faure_2021	40	3	ndcg	0.390102	Local-single	Zero Shot	AlphaMissense
543	GFP_AEQVI_Sarkisyan_2016	40	4	ndcg	0.511415	Compound-multi	Zero Shot	AlphaMissense
544	GRB2_HUMAN_Faure_2021	40	2	ndcg	0.688829	Compound-multi	Zero Shot	AlphaMissense
545	DLG4_HUMAN_Faure_2021	40	4	ndcg	0.484579	Local-single	Zero Shot	AlphaMissense
546	SPG1_STRSG_Olson_2014	40	5	ndcg	0.228458	Compound-multi	Zero Shot	AlphaMissense
547	PABP_YEAST_Melamed_2013	160	5	ndcg	0.591047	Local-single	Zero Shot	AlphaMissense
548	CAPSD_AAV2S_Sinai_substitutions_2021	160	1	ndcg	0.524732	Local-single	Zero Shot	AlphaMissense
549	DLG4_HUMAN_Faure_2021	40	3	ndcg	0.337653	Compound-multi	Zero Shot	AlphaMissense
550	GFP_AEQVI_Sarkisyan_2016	40	3	ndcg	0.842435	Local-single	Zero Shot	AlphaMissense
551	PABP_YEAST_Melamed_2013	20	1	ndcg	0.776085	Local-single	Zero Shot	AlphaMissense
552	DLG4_HUMAN_Faure_2021	80	4	ndcg	0.0868196	Compound-multi	Zero Shot	AlphaMissense
553	SPG1_STRSG_Olson_2014	20	1	ndcg	0.26238	Compound-multi	Zero Shot	AlphaMissense
554	PABP_YEAST_Melamed_2013	320	5	ndcg	0.533149	Compound-multi	Zero Shot	AlphaMissense
555	HIS7_YEAST_Pokusaeva_2019	20	1	ndcg	0.777682	Local-single	Zero Shot	AlphaMissense
556	YAP1_HUMAN_Araya_2012	20	1	ndcg	0.163226	Local-single	Zero Shot	AlphaMissense
557	DLG4_HUMAN_Faure_2021	20	3	ndcg	0.517711	Local-single	Zero Shot	AlphaMissense
558	PABP_YEAST_Melamed_2013	160	5	ndcg	0.576611	Compound-multi	Zero Shot	AlphaMissense
559	CAPSD_AAV2S_Sinai_substitutions_2021	320	1	ndcg	0.314889	Compound-multi	Zero Shot	AlphaMissense
560	GRB2_HUMAN_Faure_2021	20	2	ndcg	0.693471	Local-single	Zero Shot	AlphaMissense
561	GFP_AEQVI_Sarkisyan_2016	20	2	ndcg	0.197695	Compound-multi	Zero Shot	AlphaMissense
562	A4_HUMAN_Seuma_2021	320	4	ndcg	0.345738	Compound-multi	Zero Shot	AlphaMissense
563	DLG4_HUMAN_Faure_2021	80	4	ndcg	0.548864	Local-single	Zero Shot	AlphaMissense
564	GRB2_HUMAN_Faure_2021	320	2	ndcg	0.668327	Compound-multi	Zero Shot	AlphaMissense
565	DLG4_HUMAN_Faure_2021	20	3	ndcg	0.506466	Compound-multi	Zero Shot	AlphaMissense
566	F7YBW8_MESOW_Aakre_2015	20	5	ndcg	0.681263	Compound-multi	Zero Shot	AlphaMissense
567	SPG1_STRSG_Olson_2014	320	1	ndcg	0.572527	Compound-multi	Zero Shot	AlphaMissense
568	CAPSD_AAV2S_Sinai_substitutions_2021	320	1	ndcg	0.462367	Local-single	Zero Shot	AlphaMissense
569	HIS7_YEAST_Pokusaeva_2019	20	1	ndcg	0.592456	Compound-multi	Zero Shot	AlphaMissense
570	SPG1_STRSG_Olson_2014	160	1	ndcg	0.493166	Local-single	Zero Shot	AlphaMissense
571	SPG1_STRSG_Olson_2014	20	1	ndcg	0.242326	Local-single	Zero Shot	AlphaMissense
572	GFP_AEQVI_Sarkisyan_2016	20	4	ndcg	0.658449	Local-single	Zero Shot	AlphaMissense
573	DLG4_HUMAN_Faure_2021	40	4	ndcg	0.237899	Compound-multi	Zero Shot	AlphaMissense
574	CAPSD_AAV2S_Sinai_substitutions_2021	40	1	ndcg	0.874927	Compound-multi	Zero Shot	AlphaMissense
575	GFP_AEQVI_Sarkisyan_2016	80	3	ndcg	0.615263	Local-single	Zero Shot	AlphaMissense
576	GFP_AEQVI_Sarkisyan_2016	20	2	ndcg	0.78264	Local-single	Zero Shot	AlphaMissense
577	GRB2_HUMAN_Faure_2021	80	2	ndcg	0.57166	Compound-multi	Zero Shot	AlphaMissense
578	A4_HUMAN_Seuma_2021	160	4	ndcg	0.426016	Local-single	Zero Shot	AlphaMissense
579	DLG4_HUMAN_Faure_2021	160	3	ndcg	0.501639	Local-single	Zero Shot	AlphaMissense
580	GRB2_HUMAN_Faure_2021	80	2	ndcg	0.860129	Local-single	Zero Shot	AlphaMissense
581	SPG1_STRSG_Olson_2014	80	1	ndcg	0.682964	Compound-multi	Zero Shot	AlphaMissense
582	SPG1_STRSG_Olson_2014	40	1	ndcg	0.536614	Local-single	Zero Shot	AlphaMissense
583	CAPSD_AAV2S_Sinai_substitutions_2021	40	1	ndcg	0.833246	Local-single	Zero Shot	AlphaMissense
584	DLG4_HUMAN_Faure_2021	320	3	ndcg	0.6677	Local-single	Zero Shot	AlphaMissense
585	CAPSD_AAV2S_Sinai_substitutions_2021	20	1	ndcg	0.212326	Local-single	Zero Shot	AlphaMissense
586	YAP1_HUMAN_Araya_2012	20	1	ndcg	0.542329	Compound-multi	Zero Shot	AlphaMissense
587	DLG4_HUMAN_Faure_2021	160	3	ndcg	0.465657	Compound-multi	Zero Shot	AlphaMissense
588	PABP_YEAST_Melamed_2013	20	1	ndcg	0.270616	Compound-multi	Zero Shot	AlphaMissense
589	GRB2_HUMAN_Faure_2021	40	5	ndcg	0.652476	Local-single	Zero Shot	AlphaMissense
590	CAPSD_AAV2S_Sinai_substitutions_2021	20	1	ndcg	0.132704	Compound-multi	Zero Shot	AlphaMissense
591	DLG4_HUMAN_Faure_2021	80	3	ndcg	0.447643	Compound-multi	Zero Shot	AlphaMissense
592	PABP_YEAST_Melamed_2013	320	5	ndcg	0.70004	Local-single	Zero Shot	AlphaMissense
593	GRB2_HUMAN_Faure_2021	160	2	ndcg	0.612908	Compound-multi	Zero Shot	AlphaMissense
594	CAPSD_AAV2S_Sinai_substitutions_2021	80	1	ndcg	0.401669	Local-single	Zero Shot	AlphaMissense
595	DLG4_HUMAN_Faure_2021	20	4	ndcg	0.23176	Local-single	Zero Shot	AlphaMissense
596	GRB2_HUMAN_Faure_2021	40	2	ndcg	0.656482	Local-single	Zero Shot	AlphaMissense
597	PABP_YEAST_Melamed_2013	80	5	ndcg	0.518256	Local-single	Zero Shot	AlphaMissense
598	SPG1_STRSG_Olson_2014	40	1	ndcg	0.274159	Compound-multi	Zero Shot	AlphaMissense
599	DLG4_HUMAN_Faure_2021	80	3	ndcg	0.757455	Local-single	Zero Shot	AlphaMissense
600	SPG1_STRSG_Olson_2014	80	1	ndcg	0.739766	Local-single	Zero Shot	AlphaMissense
601	GFP_AEQVI_Sarkisyan_2016	40	2	ndcg	0.766496	Compound-multi	Zero Shot	AlphaMissense
602	SPG1_STRSG_Olson_2014	20	5	ndcg	0.332927	Local-single	Zero Shot	AlphaMissense
603	DLG4_HUMAN_Faure_2021	20	4	ndcg	0.493751	Compound-multi	Zero Shot	AlphaMissense
604	CAPSD_AAV2S_Sinai_substitutions_2021	80	1	ndcg	0.147694	Compound-multi	Zero Shot	AlphaMissense
605	F7YBW8_MESOW_Aakre_2015	20	5	ndcg	0.662293	Local-single	Zero Shot	AlphaMissense
606	GRB2_HUMAN_Faure_2021	160	1	ndcg	0.368583	Compound-multi	Zero Shot	AlphaMissense
607	HIS7_YEAST_Pokusaeva_2019	80	5	ndcg	0.186547	Local-single	Zero Shot	AlphaMissense
608	GCN4_YEAST_Staller_induction_2018	20	2	ndcg	0.517984	Local-single	Zero Shot	AlphaMissense
609	DLG4_HUMAN_Faure_2021	20	5	ndcg	0.314327	Local-single	Zero Shot	AlphaMissense
610	DLG4_HUMAN_Faure_2021	80	2	ndcg	0.180312	Compound-multi	Zero Shot	AlphaMissense
611	HIS7_YEAST_Pokusaeva_2019	40	5	ndcg	0.404317	Compound-multi	Zero Shot	AlphaMissense
612	GFP_AEQVI_Sarkisyan_2016	80	2	ndcg	0.656372	Compound-multi	Zero Shot	AlphaMissense
613	GRB2_HUMAN_Faure_2021	20	3	ndcg	0.583157	Local-single	Zero Shot	AlphaMissense
614	CAPSD_AAV2S_Sinai_substitutions_2021	80	2	ndcg	0.246434	Compound-multi	Zero Shot	AlphaMissense
615	PABP_YEAST_Melamed_2013	20	5	ndcg	0.497062	Compound-multi	Zero Shot	AlphaMissense
616	GFP_AEQVI_Sarkisyan_2016	40	4	ndcg	0.830796	Local-single	Zero Shot	AlphaMissense
617	DLG4_HUMAN_Faure_2021	40	5	ndcg	0.138686	Compound-multi	Zero Shot	AlphaMissense
618	GFP_AEQVI_Sarkisyan_2016	20	4	ndcg	0.274879	Compound-multi	Zero Shot	AlphaMissense
619	CAPSD_AAV2S_Sinai_substitutions_2021	80	2	ndcg	0.463521	Local-single	Zero Shot	AlphaMissense
620	DLG4_HUMAN_Faure_2021	40	2	ndcg	0.624061	Local-single	Zero Shot	AlphaMissense
621	PABP_YEAST_Melamed_2013	40	1	ndcg	0.588799	Compound-multi	Zero Shot	AlphaMissense
622	PABP_YEAST_Melamed_2013	320	4	ndcg	0.34677	Local-single	Zero Shot	AlphaMissense
623	SPG1_STRSG_Olson_2014	20	2	ndcg	0.379165	Local-single	Zero Shot	AlphaMissense
624	YAP1_HUMAN_Araya_2012	40	1	ndcg	0.373948	Local-single	Zero Shot	AlphaMissense
625	GRB2_HUMAN_Faure_2021	160	1	ndcg	0.619396	Local-single	Zero Shot	AlphaMissense
626	A4_HUMAN_Seuma_2021	320	4	ndcg	0.356908	Local-single	Zero Shot	AlphaMissense
627	YAP1_HUMAN_Araya_2012	80	5	ndcg	0.252607	Local-single	Zero Shot	AlphaMissense
628	DLG4_HUMAN_Faure_2021	40	2	ndcg	0.704407	Compound-multi	Zero Shot	AlphaMissense
629	DLG4_HUMAN_Faure_2021	40	5	ndcg	0.582432	Local-single	Zero Shot	AlphaMissense
630	HIS7_YEAST_Pokusaeva_2019	20	5	ndcg	0.270277	Local-single	Zero Shot	AlphaMissense
631	CAPSD_AAV2S_Sinai_substitutions_2021	160	2	ndcg	0.262354	Compound-multi	Zero Shot	AlphaMissense
632	GRB2_HUMAN_Faure_2021	40	3	ndcg	0.267204	Compound-multi	Zero Shot	AlphaMissense
633	GFP_AEQVI_Sarkisyan_2016	320	1	ndcg	0.559418	Compound-multi	Zero Shot	AlphaMissense
634	DLG4_HUMAN_Faure_2021	20	2	ndcg	0.770529	Local-single	Zero Shot	AlphaMissense
635	F7YBW8_MESOW_Aakre_2015	20	4	ndcg	0.833551	Compound-multi	Zero Shot	AlphaMissense
636	PABP_YEAST_Melamed_2013	320	4	ndcg	0.491867	Compound-multi	Zero Shot	AlphaMissense
637	SPG1_STRSG_Olson_2014	40	2	ndcg	0.373571	Local-single	Zero Shot	AlphaMissense
638	DLG4_HUMAN_Faure_2021	80	5	ndcg	0.517453	Compound-multi	Zero Shot	AlphaMissense
639	SPG1_STRSG_Olson_2014	40	2	ndcg	0.208573	Compound-multi	Zero Shot	AlphaMissense
640	SPG1_STRSG_Olson_2014	40	5	ndcg	0.198837	Local-single	Zero Shot	AlphaMissense
641	GRB2_HUMAN_Faure_2021	320	1	ndcg	0.479872	Compound-multi	Zero Shot	AlphaMissense
642	PABP_YEAST_Melamed_2013	20	5	ndcg	0.699778	Local-single	Zero Shot	AlphaMissense
643	DLG4_HUMAN_Faure_2021	320	2	ndcg	0.515695	Local-single	Zero Shot	AlphaMissense
644	A4_HUMAN_Seuma_2021	160	4	ndcg	0.293468	Compound-multi	Zero Shot	AlphaMissense
645	GFP_AEQVI_Sarkisyan_2016	40	2	ndcg	0.564448	Local-single	Zero Shot	AlphaMissense
646	CAPSD_AAV2S_Sinai_substitutions_2021	20	2	ndcg	0.51373	Compound-multi	Zero Shot	AlphaMissense
647	GRB2_HUMAN_Faure_2021	20	2	ndcg	0.5401	Compound-multi	Zero Shot	AlphaMissense
648	PABP_YEAST_Melamed_2013	80	5	ndcg	0.270342	Compound-multi	Zero Shot	AlphaMissense
649	DLG4_HUMAN_Faure_2021	160	4	ndcg	0.578904	Local-single	Zero Shot	AlphaMissense
650	DLG4_HUMAN_Faure_2021	320	2	ndcg	0.638862	Compound-multi	Zero Shot	AlphaMissense
651	SPG1_STRSG_Olson_2014	320	1	ndcg	0.603541	Local-single	Zero Shot	AlphaMissense
652	GRB2_HUMAN_Faure_2021	320	2	ndcg	0.674614	Local-single	Zero Shot	AlphaMissense
653	CAPSD_AAV2S_Sinai_substitutions_2021	20	2	ndcg	0.479872	Local-single	Zero Shot	AlphaMissense
654	HIS7_YEAST_Pokusaeva_2019	80	5	ndcg	0.749965	Compound-multi	Zero Shot	AlphaMissense
655	YAP1_HUMAN_Araya_2012	40	1	ndcg	0.52581	Compound-multi	Zero Shot	AlphaMissense
656	SPG1_STRSG_Olson_2014	20	5	ndcg	0.0824583	Compound-multi	Zero Shot	AlphaMissense
657	DLG4_HUMAN_Faure_2021	160	2	ndcg	0.822035	Local-single	Zero Shot	AlphaMissense
658	DLG4_HUMAN_Faure_2021	320	4	ndcg	0.619685	Compound-multi	Zero Shot	AlphaMissense
659	PABP_YEAST_Melamed_2013	40	5	ndcg	0.670518	Local-single	Zero Shot	AlphaMissense
660	DLG4_HUMAN_Faure_2021	20	5	ndcg	0.646981	Compound-multi	Zero Shot	AlphaMissense
661	DLG4_HUMAN_Faure_2021	80	2	ndcg	0.435349	Local-single	Zero Shot	AlphaMissense
662	CAPSD_AAV2S_Sinai_substitutions_2021	40	2	ndcg	0.0467863	Local-single	Zero Shot	AlphaMissense
663	GFP_AEQVI_Sarkisyan_2016	320	1	ndcg	0.546005	Local-single	Zero Shot	AlphaMissense
664	HIS7_YEAST_Pokusaeva_2019	40	5	ndcg	0.114445	Local-single	Zero Shot	AlphaMissense
665	A4_HUMAN_Seuma_2021	320	5	ndcg	0.339845	Local-single	Zero Shot	AlphaMissense
666	DLG4_HUMAN_Faure_2021	160	4	ndcg	0.0205132	Compound-multi	Zero Shot	AlphaMissense
667	F7YBW8_MESOW_Aakre_2015	20	4	ndcg	0.753389	Local-single	Zero Shot	AlphaMissense
668	GRB2_HUMAN_Faure_2021	20	3	ndcg	0.581748	Compound-multi	Zero Shot	AlphaMissense
669	DLG4_HUMAN_Faure_2021	160	2	ndcg	0.689976	Compound-multi	Zero Shot	AlphaMissense
670	SPG1_STRSG_Olson_2014	20	2	ndcg	0.23543	Compound-multi	Zero Shot	AlphaMissense
671	DLG4_HUMAN_Faure_2021	320	4	ndcg	0.741	Local-single	Zero Shot	AlphaMissense
672	CAPSD_AAV2S_Sinai_substitutions_2021	40	2	ndcg	0.192397	Compound-multi	Zero Shot	AlphaMissense
673	GRB2_HUMAN_Faure_2021	320	1	ndcg	0.57191	Local-single	Zero Shot	AlphaMissense
674	PABP_YEAST_Melamed_2013	40	5	ndcg	0.410965	Compound-multi	Zero Shot	AlphaMissense
675	F7YBW8_MESOW_Aakre_2015	20	2	ndcg	0.753389	Local-single	Zero Shot	AlphaMissense
676	DLG4_HUMAN_Faure_2021	20	1	ndcg	0.242956	Compound-multi	Zero Shot	AlphaMissense
677	DLG4_HUMAN_Faure_2021	320	3	ndcg	0.552064	Compound-multi	Zero Shot	AlphaMissense
678	F7YBW8_MESOW_Aakre_2015	20	1	ndcg	0.624568	Local-single	Zero Shot	AlphaMissense
679	YAP1_HUMAN_Araya_2012	40	2	ndcg	0.291862	Local-single	Zero Shot	AlphaMissense
680	SPG1_STRSG_Olson_2014	160	3	ndcg	0.570847	Compound-multi	Zero Shot	AlphaMissense
681	HIS7_YEAST_Pokusaeva_2019	20	3	ndcg	0.924228	Compound-multi	Zero Shot	AlphaMissense
682	YAP1_HUMAN_Araya_2012	40	4	ndcg	0.342972	Local-single	Zero Shot	AlphaMissense
683	GFP_AEQVI_Sarkisyan_2016	20	5	ndcg	0.13303	Compound-multi	Zero Shot	AlphaMissense
684	PABP_YEAST_Melamed_2013	320	2	ndcg	0.38286	Compound-multi	Zero Shot	AlphaMissense
685	GFP_AEQVI_Sarkisyan_2016	80	3	ndcg	0.833201	Compound-multi	Zero Shot	AlphaMissense
686	CAPSD_AAV2S_Sinai_substitutions_2021	160	5	ndcg	0.295881	Compound-multi	Zero Shot	AlphaMissense
687	HIS7_YEAST_Pokusaeva_2019	20	2	ndcg	0.103163	Local-single	Zero Shot	AlphaMissense
688	CAPSD_AAV2S_Sinai_substitutions_2021	320	4	ndcg	0.328464	Compound-multi	Zero Shot	AlphaMissense
689	YAP1_HUMAN_Araya_2012	20	3	ndcg	0.228531	Local-single	Zero Shot	AlphaMissense
690	A4_HUMAN_Seuma_2021	160	2	ndcg	0.312526	Local-single	Zero Shot	AlphaMissense
691	GCN4_YEAST_Staller_induction_2018	20	5	ndcg	0.517984	Local-single	Zero Shot	AlphaMissense
692	GRB2_HUMAN_Faure_2021	160	5	ndcg	0.699106	Local-single	Zero Shot	AlphaMissense
693	YAP1_HUMAN_Araya_2012	20	2	ndcg	0.43351	Local-single	Zero Shot	AlphaMissense
694	YAP1_HUMAN_Araya_2012	40	4	ndcg	0.0745668	Compound-multi	Zero Shot	AlphaMissense
695	GFP_AEQVI_Sarkisyan_2016	320	2	ndcg	0.606105	Local-single	Zero Shot	AlphaMissense
696	A4_HUMAN_Seuma_2021	80	3	ndcg	0.381064	Local-single	Zero Shot	AlphaMissense
697	PABP_YEAST_Melamed_2013	160	2	ndcg	0.57962	Local-single	Zero Shot	AlphaMissense
698	GFP_AEQVI_Sarkisyan_2016	80	5	ndcg	0.710334	Compound-multi	Zero Shot	AlphaMissense
699	YAP1_HUMAN_Araya_2012	40	3	ndcg	0.323664	Compound-multi	Zero Shot	AlphaMissense
700	SPG1_STRSG_Olson_2014	160	3	ndcg	0.670538	Local-single	Zero Shot	AlphaMissense
701	A4_HUMAN_Seuma_2021	320	2	ndcg	0.316972	Compound-multi	Zero Shot	AlphaMissense
702	A4_HUMAN_Seuma_2021	40	4	ndcg	0.0114941	Compound-multi	Zero Shot	AlphaMissense
703	SPG1_STRSG_Olson_2014	20	4	ndcg	0.703835	Local-single	Zero Shot	AlphaMissense
704	GRB2_HUMAN_Faure_2021	40	4	ndcg	0.880461	Local-single	Zero Shot	AlphaMissense
705	CAPSD_AAV2S_Sinai_substitutions_2021	160	4	ndcg	0.323123	Local-single	Zero Shot	AlphaMissense
706	YAP1_HUMAN_Araya_2012	20	3	ndcg	0.405107	Compound-multi	Zero Shot	AlphaMissense
707	GFP_AEQVI_Sarkisyan_2016	80	1	ndcg	0.624862	Compound-multi	Zero Shot	AlphaMissense
708	A4_HUMAN_Seuma_2021	80	2	ndcg	0.133508	Compound-multi	Zero Shot	AlphaMissense
709	A4_HUMAN_Seuma_2021	40	5	ndcg	0.252052	Compound-multi	Zero Shot	AlphaMissense
710	GRB2_HUMAN_Faure_2021	40	4	ndcg	0.46276	Compound-multi	Zero Shot	AlphaMissense
711	GFP_AEQVI_Sarkisyan_2016	40	3	ndcg	0.196771	Compound-multi	Zero Shot	AlphaMissense
712	SPG1_STRSG_Olson_2014	80	3	ndcg	0.459982	Local-single	Zero Shot	AlphaMissense
713	CAPSD_AAV2S_Sinai_substitutions_2021	160	5	ndcg	0.411998	Local-single	Zero Shot	AlphaMissense
714	YAP1_HUMAN_Araya_2012	80	4	ndcg	0.155787	Local-single	Zero Shot	AlphaMissense
715	PABP_YEAST_Melamed_2013	20	3	ndcg	0.499454	Compound-multi	Zero Shot	AlphaMissense
716	HIS7_YEAST_Pokusaeva_2019	80	1	ndcg	0.362418	Compound-multi	Zero Shot	AlphaMissense
717	GFP_AEQVI_Sarkisyan_2016	80	5	ndcg	0.858206	Local-single	Zero Shot	AlphaMissense
718	HIS7_YEAST_Pokusaeva_2019	20	3	ndcg	0.232551	Local-single	Zero Shot	AlphaMissense
719	CAPSD_AAV2S_Sinai_substitutions_2021	160	4	ndcg	0.149281	Compound-multi	Zero Shot	AlphaMissense
720	A4_HUMAN_Seuma_2021	80	2	ndcg	0.2589	Local-single	Zero Shot	AlphaMissense
721	GRB2_HUMAN_Faure_2021	320	4	ndcg	0.477495	Compound-multi	Zero Shot	AlphaMissense
722	SPG1_STRSG_Olson_2014	40	4	ndcg	0.254011	Compound-multi	Zero Shot	AlphaMissense
723	A4_HUMAN_Seuma_2021	160	5	ndcg	0.554586	Compound-multi	Zero Shot	AlphaMissense
724	SPG1_STRSG_Olson_2014	160	5	ndcg	0.683076	Compound-multi	Zero Shot	AlphaMissense
725	PABP_YEAST_Melamed_2013	20	2	ndcg	0.261265	Compound-multi	Zero Shot	AlphaMissense
726	A4_HUMAN_Seuma_2021	160	3	ndcg	0.448313	Compound-multi	Zero Shot	AlphaMissense
727	YAP1_HUMAN_Araya_2012	80	4	ndcg	0.0479834	Compound-multi	Zero Shot	AlphaMissense
728	PABP_YEAST_Melamed_2013	320	2	ndcg	0.549965	Local-single	Zero Shot	AlphaMissense
729	A4_HUMAN_Seuma_2021	160	2	ndcg	0.158491	Compound-multi	Zero Shot	AlphaMissense
730	PABP_YEAST_Melamed_2013	40	2	ndcg	0.593239	Local-single	Zero Shot	AlphaMissense
731	GFP_AEQVI_Sarkisyan_2016	160	5	ndcg	0.481648	Compound-multi	Zero Shot	AlphaMissense
732	GFP_AEQVI_Sarkisyan_2016	160	4	ndcg	0.653113	Compound-multi	Zero Shot	AlphaMissense
733	HIS7_YEAST_Pokusaeva_2019	80	2	ndcg	0.155533	Local-single	Zero Shot	AlphaMissense
734	GFP_AEQVI_Sarkisyan_2016	20	5	ndcg	0.737133	Local-single	Zero Shot	AlphaMissense
735	F7YBW8_MESOW_Aakre_2015	20	1	ndcg	0.803627	Compound-multi	Zero Shot	AlphaMissense
736	CAPSD_AAV2S_Sinai_substitutions_2021	80	5	ndcg	0.788943	Compound-multi	Zero Shot	AlphaMissense
737	SPG1_STRSG_Olson_2014	320	5	ndcg	0.405401	Compound-multi	Zero Shot	AlphaMissense
738	SPG1_STRSG_Olson_2014	160	5	ndcg	0.623775	Local-single	Zero Shot	AlphaMissense
739	A4_HUMAN_Seuma_2021	20	3	ndcg	0.473797	Local-single	Zero Shot	AlphaMissense
740	A4_HUMAN_Seuma_2021	40	3	ndcg	0.43142	Local-single	Zero Shot	AlphaMissense
741	PABP_YEAST_Melamed_2013	80	2	ndcg	0.741022	Compound-multi	Zero Shot	AlphaMissense
742	YAP1_HUMAN_Araya_2012	160	3	ndcg	0.0161773	Compound-multi	Zero Shot	AlphaMissense
743	YAP1_HUMAN_Araya_2012	80	3	ndcg	0.0398509	Compound-multi	Zero Shot	AlphaMissense
744	SPG1_STRSG_Olson_2014	20	4	ndcg	0.728343	Compound-multi	Zero Shot	AlphaMissense
745	PABP_YEAST_Melamed_2013	40	2	ndcg	0.655926	Compound-multi	Zero Shot	AlphaMissense
746	SPG1_STRSG_Olson_2014	320	3	ndcg	0.281012	Local-single	Zero Shot	AlphaMissense
747	GFP_AEQVI_Sarkisyan_2016	20	3	ndcg	0.256407	Compound-multi	Zero Shot	AlphaMissense
748	YAP1_HUMAN_Araya_2012	40	2	ndcg	0.140018	Compound-multi	Zero Shot	AlphaMissense
749	GFP_AEQVI_Sarkisyan_2016	40	5	ndcg	0.328853	Compound-multi	Zero Shot	AlphaMissense
750	A4_HUMAN_Seuma_2021	40	5	ndcg	0.258608	Local-single	Zero Shot	AlphaMissense
751	GFP_AEQVI_Sarkisyan_2016	40	1	ndcg	0.395817	Compound-multi	Zero Shot	AlphaMissense
752	GCN4_YEAST_Staller_induction_2018	20	1	ndcg	0.517984	Local-single	Zero Shot	AlphaMissense
753	A4_HUMAN_Seuma_2021	80	5	ndcg	0.478653	Local-single	Zero Shot	AlphaMissense
754	HIS7_YEAST_Pokusaeva_2019	40	2	ndcg	0.0985743	Local-single	Zero Shot	AlphaMissense
755	CAPSD_AAV2S_Sinai_substitutions_2021	40	5	ndcg	0.469959	Local-single	Zero Shot	AlphaMissense
756	YAP1_HUMAN_Araya_2012	80	3	ndcg	0.141551	Local-single	Zero Shot	AlphaMissense
757	A4_HUMAN_Seuma_2021	40	3	ndcg	0.390318	Compound-multi	Zero Shot	AlphaMissense
758	CAPSD_AAV2S_Sinai_substitutions_2021	40	5	ndcg	0.285702	Compound-multi	Zero Shot	AlphaMissense
759	CAPSD_AAV2S_Sinai_substitutions_2021	320	4	ndcg	0.455861	Local-single	Zero Shot	AlphaMissense
760	GRB2_HUMAN_Faure_2021	160	5	ndcg	0.582607	Compound-multi	Zero Shot	AlphaMissense
761	CAPSD_AAV2S_Sinai_substitutions_2021	20	5	ndcg	0.694084	Local-single	Zero Shot	AlphaMissense
762	SPG1_STRSG_Olson_2014	160	4	ndcg	0.761056	Compound-multi	Zero Shot	AlphaMissense
763	YAP1_HUMAN_Araya_2012	20	4	ndcg	0.367609	Local-single	Zero Shot	AlphaMissense
764	PABP_YEAST_Melamed_2013	20	2	ndcg	0.493411	Local-single	Zero Shot	AlphaMissense
765	CAPSD_AAV2S_Sinai_substitutions_2021	80	5	ndcg	0.489232	Local-single	Zero Shot	AlphaMissense
766	GRB2_HUMAN_Faure_2021	80	4	ndcg	0.171826	Compound-multi	Zero Shot	AlphaMissense
767	GFP_AEQVI_Sarkisyan_2016	40	1	ndcg	0.519668	Local-single	Zero Shot	AlphaMissense
768	A4_HUMAN_Seuma_2021	20	4	ndcg	0.369379	Local-single	Zero Shot	AlphaMissense
769	GFP_AEQVI_Sarkisyan_2016	160	3	ndcg	0.642387	Local-single	Zero Shot	AlphaMissense
770	GRB2_HUMAN_Faure_2021	160	4	ndcg	0.65407	Local-single	Zero Shot	AlphaMissense
771	CAPSD_AAV2S_Sinai_substitutions_2021	320	3	ndcg	0.516388	Local-single	Zero Shot	AlphaMissense
772	CAPSD_AAV2S_Sinai_substitutions_2021	20	5	ndcg	0.722638	Compound-multi	Zero Shot	AlphaMissense
773	PABP_YEAST_Melamed_2013	80	2	ndcg	0.520319	Local-single	Zero Shot	AlphaMissense
774	A4_HUMAN_Seuma_2021	320	2	ndcg	0.327563	Local-single	Zero Shot	AlphaMissense
775	PABP_YEAST_Melamed_2013	160	2	ndcg	0.303103	Compound-multi	Zero Shot	AlphaMissense
776	SPG1_STRSG_Olson_2014	320	3	ndcg	0.287406	Compound-multi	Zero Shot	AlphaMissense
777	PABP_YEAST_Melamed_2013	80	1	ndcg	0.851582	Local-single	Zero Shot	AlphaMissense
778	GFP_AEQVI_Sarkisyan_2016	40	5	ndcg	0.576079	Local-single	Zero Shot	AlphaMissense
779	A4_HUMAN_Seuma_2021	80	3	ndcg	0.429553	Compound-multi	Zero Shot	AlphaMissense
780	YAP1_HUMAN_Araya_2012	40	3	ndcg	0.181196	Local-single	Zero Shot	AlphaMissense
781	HIS7_YEAST_Pokusaeva_2019	40	2	ndcg	0.496254	Compound-multi	Zero Shot	AlphaMissense
782	A4_HUMAN_Seuma_2021	20	3	ndcg	0.4202	Compound-multi	Zero Shot	AlphaMissense
783	HIS7_YEAST_Pokusaeva_2019	80	2	ndcg	0.508944	Compound-multi	Zero Shot	AlphaMissense
784	YAP1_HUMAN_Araya_2012	160	3	ndcg	0.148449	Local-single	Zero Shot	AlphaMissense
785	GRB2_HUMAN_Faure_2021	80	4	ndcg	0.485312	Local-single	Zero Shot	AlphaMissense
786	YAP1_HUMAN_Araya_2012	20	4	ndcg	0.000298356	Compound-multi	Zero Shot	AlphaMissense
787	GFP_AEQVI_Sarkisyan_2016	20	3	ndcg	0.434303	Local-single	Zero Shot	AlphaMissense
788	SPG1_STRSG_Olson_2014	80	4	ndcg	0.657333	Local-single	Zero Shot	AlphaMissense
789	CAPSD_AAV2S_Sinai_substitutions_2021	80	4	ndcg	0.539672	Local-single	Zero Shot	AlphaMissense
790	CAPSD_AAV2S_Sinai_substitutions_2021	20	4	ndcg	0.552484	Local-single	Zero Shot	AlphaMissense
791	YAP1_HUMAN_Araya_2012	160	1	ndcg	0.209057	Local-single	Zero Shot	AlphaMissense
792	HIS7_YEAST_Pokusaeva_2019	80	1	ndcg	0.0848078	Local-single	Zero Shot	AlphaMissense
793	A4_HUMAN_Seuma_2021	320	3	ndcg	0.3414	Local-single	Zero Shot	AlphaMissense
794	GRB2_HUMAN_Faure_2021	20	4	ndcg	0.299551	Compound-multi	Zero Shot	AlphaMissense
795	CAPSD_AAV2S_Sinai_substitutions_2021	320	5	ndcg	0.451871	Local-single	Zero Shot	AlphaMissense
796	YAP1_HUMAN_Araya_2012	40	5	ndcg	0.165519	Compound-multi	Zero Shot	AlphaMissense
797	A4_HUMAN_Seuma_2021	20	2	ndcg	0.259542	Compound-multi	Zero Shot	AlphaMissense
798	GFP_AEQVI_Sarkisyan_2016	320	5	ndcg	0.758004	Compound-multi	Zero Shot	AlphaMissense
799	PABP_YEAST_Melamed_2013	80	3	ndcg	0.773811	Compound-multi	Zero Shot	AlphaMissense
800	SPG1_STRSG_Olson_2014	40	3	ndcg	0.329718	Compound-multi	Zero Shot	AlphaMissense
801	PABP_YEAST_Melamed_2013	160	1	ndcg	0.338939	Compound-multi	Zero Shot	AlphaMissense
802	CAPSD_AAV2S_Sinai_substitutions_2021	40	4	ndcg	0.629439	Compound-multi	Zero Shot	AlphaMissense
803	YAP1_HUMAN_Araya_2012	20	5	ndcg	0.296617	Local-single	Zero Shot	AlphaMissense
804	PABP_YEAST_Melamed_2013	40	3	ndcg	0.525781	Local-single	Zero Shot	AlphaMissense
805	GFP_AEQVI_Sarkisyan_2016	20	1	ndcg	0.512108	Local-single	Zero Shot	AlphaMissense
806	A4_HUMAN_Seuma_2021	20	2	ndcg	0.579192	Local-single	Zero Shot	AlphaMissense
807	PABP_YEAST_Melamed_2013	320	1	ndcg	0.337854	Compound-multi	Zero Shot	AlphaMissense
808	SPG1_STRSG_Olson_2014	40	3	ndcg	0.177028	Local-single	Zero Shot	AlphaMissense
809	A4_HUMAN_Seuma_2021	320	3	ndcg	0.293478	Compound-multi	Zero Shot	AlphaMissense
810	HIS7_YEAST_Pokusaeva_2019	40	3	ndcg	0.275717	Local-single	Zero Shot	AlphaMissense
811	GFP_AEQVI_Sarkisyan_2016	320	2	ndcg	0.661459	Compound-multi	Zero Shot	AlphaMissense
812	GRB2_HUMAN_Faure_2021	320	4	ndcg	0.539437	Local-single	Zero Shot	AlphaMissense
813	GFP_AEQVI_Sarkisyan_2016	320	3	ndcg	0.661316	Compound-multi	Zero Shot	AlphaMissense
814	A4_HUMAN_Seuma_2021	80	5	ndcg	0.375375	Compound-multi	Zero Shot	AlphaMissense
815	GFP_AEQVI_Sarkisyan_2016	320	4	ndcg	0.628836	Compound-multi	Zero Shot	AlphaMissense
816	HIS7_YEAST_Pokusaeva_2019	80	3	ndcg	0.205068	Local-single	Zero Shot	AlphaMissense
817	PABP_YEAST_Melamed_2013	160	3	ndcg	0.633114	Compound-multi	Zero Shot	AlphaMissense
818	YAP1_HUMAN_Araya_2012	80	2	ndcg	0.0826661	Compound-multi	Zero Shot	AlphaMissense
819	GFP_AEQVI_Sarkisyan_2016	80	4	ndcg	0.845162	Local-single	Zero Shot	AlphaMissense
820	A4_HUMAN_Seuma_2021	20	4	ndcg	0.304006	Compound-multi	Zero Shot	AlphaMissense
821	GFP_AEQVI_Sarkisyan_2016	20	1	ndcg	0.948174	Compound-multi	Zero Shot	AlphaMissense
822	SPG1_STRSG_Olson_2014	20	3	ndcg	0.664557	Local-single	Zero Shot	AlphaMissense
823	GFP_AEQVI_Sarkisyan_2016	320	5	ndcg	0.820026	Local-single	Zero Shot	AlphaMissense
824	YAP1_HUMAN_Araya_2012	80	5	ndcg	0.0355974	Compound-multi	Zero Shot	AlphaMissense
825	A4_HUMAN_Seuma_2021	320	1	ndcg	0.323316	Compound-multi	Zero Shot	AlphaMissense
826	GFP_AEQVI_Sarkisyan_2016	80	1	ndcg	0.602676	Local-single	Zero Shot	AlphaMissense
827	GRB2_HUMAN_Faure_2021	320	3	ndcg	0.594185	Local-single	Zero Shot	AlphaMissense
828	SPG1_STRSG_Olson_2014	80	4	ndcg	0.683618	Compound-multi	Zero Shot	AlphaMissense
829	CAPSD_AAV2S_Sinai_substitutions_2021	20	4	ndcg	0.129045	Compound-multi	Zero Shot	AlphaMissense
830	PABP_YEAST_Melamed_2013	160	1	ndcg	0.557621	Local-single	Zero Shot	AlphaMissense
831	PABP_YEAST_Melamed_2013	80	3	ndcg	0.625935	Local-single	Zero Shot	AlphaMissense
832	YAP1_HUMAN_Araya_2012	80	2	ndcg	0.348056	Local-single	Zero Shot	AlphaMissense
833	YAP1_HUMAN_Araya_2012	40	5	ndcg	0.070973	Local-single	Zero Shot	AlphaMissense
834	A4_HUMAN_Seuma_2021	320	1	ndcg	0.348313	Local-single	Zero Shot	AlphaMissense
835	GRB2_HUMAN_Faure_2021	20	5	ndcg	0.169366	Compound-multi	Zero Shot	AlphaMissense
836	GCN4_YEAST_Staller_induction_2018	20	4	ndcg	0.517984	Local-single	Zero Shot	AlphaMissense
837	HIS7_YEAST_Pokusaeva_2019	80	3	ndcg	0.616974	Compound-multi	Zero Shot	AlphaMissense
838	A4_HUMAN_Seuma_2021	40	4	ndcg	0.148827	Local-single	Zero Shot	AlphaMissense
839	SPG1_STRSG_Olson_2014	40	4	ndcg	0.682674	Local-single	Zero Shot	AlphaMissense
840	SPG1_STRSG_Olson_2014	160	4	ndcg	0.774469	Local-single	Zero Shot	AlphaMissense
841	YAP1_HUMAN_Araya_2012	160	2	ndcg	0.0573722	Compound-multi	Zero Shot	AlphaMissense
842	GRB2_HUMAN_Faure_2021	160	4	ndcg	0.486875	Compound-multi	Zero Shot	AlphaMissense
843	GRB2_HUMAN_Faure_2021	320	5	ndcg	0.486168	Compound-multi	Zero Shot	AlphaMissense
844	A4_HUMAN_Seuma_2021	40	2	ndcg	0.142085	Compound-multi	Zero Shot	AlphaMissense
845	GRB2_HUMAN_Faure_2021	20	5	ndcg	0.920591	Local-single	Zero Shot	AlphaMissense
846	GRB2_HUMAN_Faure_2021	20	4	ndcg	0.666238	Local-single	Zero Shot	AlphaMissense
847	PABP_YEAST_Melamed_2013	40	3	ndcg	0.52037	Compound-multi	Zero Shot	AlphaMissense
848	A4_HUMAN_Seuma_2021	40	2	ndcg	0.108476	Local-single	Zero Shot	AlphaMissense
849	CAPSD_AAV2S_Sinai_substitutions_2021	80	4	ndcg	0.580033	Compound-multi	Zero Shot	AlphaMissense
850	YAP1_HUMAN_Araya_2012	160	2	ndcg	0.145667	Local-single	Zero Shot	AlphaMissense
851	SPG1_STRSG_Olson_2014	80	3	ndcg	0.0333295	Compound-multi	Zero Shot	AlphaMissense
852	CAPSD_AAV2S_Sinai_substitutions_2021	320	5	ndcg	0.506638	Compound-multi	Zero Shot	AlphaMissense
853	GFP_AEQVI_Sarkisyan_2016	160	3	ndcg	0.688765	Compound-multi	Zero Shot	AlphaMissense
854	PABP_YEAST_Melamed_2013	80	1	ndcg	0.824438	Compound-multi	Zero Shot	AlphaMissense
855	CAPSD_AAV2S_Sinai_substitutions_2021	40	4	ndcg	0.439839	Local-single	Zero Shot	AlphaMissense
856	HIS7_YEAST_Pokusaeva_2019	20	2	ndcg	0.249387	Compound-multi	Zero Shot	AlphaMissense
857	YAP1_HUMAN_Araya_2012	160	4	ndcg	0.229487	Local-single	Zero Shot	AlphaMissense
858	GFP_AEQVI_Sarkisyan_2016	320	4	ndcg	0.702828	Local-single	Zero Shot	AlphaMissense
859	GFP_AEQVI_Sarkisyan_2016	160	5	ndcg	0.686706	Local-single	Zero Shot	AlphaMissense
860	HIS7_YEAST_Pokusaeva_2019	40	3	ndcg	0.586709	Compound-multi	Zero Shot	AlphaMissense
861	GFP_AEQVI_Sarkisyan_2016	160	4	ndcg	0.78383	Local-single	Zero Shot	AlphaMissense
862	PABP_YEAST_Melamed_2013	320	1	ndcg	0.351412	Local-single	Zero Shot	AlphaMissense
863	YAP1_HUMAN_Araya_2012	20	2	ndcg	0.315212	Compound-multi	Zero Shot	AlphaMissense
864	A4_HUMAN_Seuma_2021	160	3	ndcg	0.373434	Local-single	Zero Shot	AlphaMissense
865	PABP_YEAST_Melamed_2013	20	3	ndcg	0.402468	Local-single	Zero Shot	AlphaMissense
866	F7YBW8_MESOW_Aakre_2015	20	2	ndcg	0.819071	Compound-multi	Zero Shot	AlphaMissense
867	YAP1_HUMAN_Araya_2012	20	5	ndcg	0.115034	Compound-multi	Zero Shot	AlphaMissense
868	YAP1_HUMAN_Araya_2012	160	4	ndcg	0.106804	Compound-multi	Zero Shot	AlphaMissense
869	HIS7_YEAST_Pokusaeva_2019	40	1	ndcg	0.138119	Local-single	Zero Shot	AlphaMissense
870	DLG4_HUMAN_Faure_2021	40	4	ndcg	0.571056	Local-single	Zero Shot	ESM-1v
871	PABP_YEAST_Melamed_2013	40	2	ndcg	0.520926	Local-single	Zero Shot	ESM-1v
872	GRB2_HUMAN_Faure_2021	20	5	ndcg	0.059559	Compound-multi	Zero Shot	ESM-1v
873	F7YBW8_MESOW_Aakre_2015	20	5	ndcg	0.730894	Local-single	Zero Shot	ESM-1v
874	A4_HUMAN_Seuma_2021	40	3	ndcg	0.579385	Local-single	Zero Shot	ESM-1v
875	HIS7_YEAST_Pokusaeva_2019	80	1	ndcg	0.43306	Local-single	Zero Shot	ESM-1v
876	HIS7_YEAST_Pokusaeva_2019	80	5	ndcg	0.161791	Local-single	Zero Shot	ESM-1v
877	DLG4_HUMAN_Faure_2021	320	4	ndcg	0.681218	Compound-multi	Zero Shot	ESM-1v
878	DLG4_HUMAN_Faure_2021	320	3	ndcg	0.695311	Local-single	Zero Shot	ESM-1v
879	PABP_YEAST_Melamed_2013	40	2	ndcg	0.475343	Compound-multi	Zero Shot	ESM-1v
880	GFP_AEQVI_Sarkisyan_2016	20	3	ndcg	0.259801	Local-single	Zero Shot	ESM-1v
881	PABP_YEAST_Melamed_2013	80	5	ndcg	0.23881	Local-single	Zero Shot	ESM-1v
882	GRB2_HUMAN_Faure_2021	320	2	ndcg	0.653002	Local-single	Zero Shot	ESM-1v
883	PABP_YEAST_Melamed_2013	320	5	ndcg	0.492705	Local-single	Zero Shot	ESM-1v
884	GFP_AEQVI_Sarkisyan_2016	40	3	ndcg	0.875512	Local-single	Zero Shot	ESM-1v
885	GRB2_HUMAN_Faure_2021	80	2	ndcg	0.887396	Local-single	Zero Shot	ESM-1v
886	GFP_AEQVI_Sarkisyan_2016	160	3	ndcg	0.266883	Compound-multi	Zero Shot	ESM-1v
887	PABP_YEAST_Melamed_2013	160	1	ndcg	0.52358	Local-single	Zero Shot	ESM-1v
888	SPG1_STRSG_Olson_2014	40	5	ndcg	0.0997948	Compound-multi	Zero Shot	ESM-1v
889	DLG4_HUMAN_Faure_2021	160	4	ndcg	0.605672	Local-single	Zero Shot	ESM-1v
890	GRB2_HUMAN_Faure_2021	160	2	ndcg	0.584825	Local-single	Zero Shot	ESM-1v
891	A4_HUMAN_Seuma_2021	20	4	ndcg	0.404497	Compound-multi	Zero Shot	ESM-1v
892	DLG4_HUMAN_Faure_2021	40	4	ndcg	0.134773	Compound-multi	Zero Shot	ESM-1v
893	SPG1_STRSG_Olson_2014	20	1	ndcg	0.116363	Local-single	Zero Shot	ESM-1v
894	A4_HUMAN_Seuma_2021	160	4	ndcg	0.222422	Compound-multi	Zero Shot	ESM-1v
895	GCN4_YEAST_Staller_induction_2018	20	4	ndcg	0.472669	Local-single	Zero Shot	ESM-1v
896	PABP_YEAST_Melamed_2013	80	5	ndcg	0.243757	Compound-multi	Zero Shot	ESM-1v
897	PABP_YEAST_Melamed_2013	320	5	ndcg	0.449084	Compound-multi	Zero Shot	ESM-1v
898	PABP_YEAST_Melamed_2013	20	1	ndcg	0.721171	Local-single	Zero Shot	ESM-1v
899	A4_HUMAN_Seuma_2021	20	4	ndcg	0.276932	Local-single	Zero Shot	ESM-1v
900	SPG1_STRSG_Olson_2014	40	1	ndcg	0.248446	Local-single	Zero Shot	ESM-1v
901	DLG4_HUMAN_Faure_2021	20	4	ndcg	0.536611	Compound-multi	Zero Shot	ESM-1v
902	PABP_YEAST_Melamed_2013	320	1	ndcg	0.449608	Compound-multi	Zero Shot	ESM-1v
903	HIS7_YEAST_Pokusaeva_2019	20	1	ndcg	0.758608	Local-single	Zero Shot	ESM-1v
904	PABP_YEAST_Melamed_2013	160	1	ndcg	0.253606	Compound-multi	Zero Shot	ESM-1v
905	PABP_YEAST_Melamed_2013	160	5	ndcg	0.42123	Compound-multi	Zero Shot	ESM-1v
906	GRB2_HUMAN_Faure_2021	320	4	ndcg	0.463449	Compound-multi	Zero Shot	ESM-1v
907	A4_HUMAN_Seuma_2021	80	3	ndcg	0.432758	Local-single	Zero Shot	ESM-1v
908	CAPSD_AAV2S_Sinai_substitutions_2021	20	1	ndcg	0.00573627	Compound-multi	Zero Shot	ESM-1v
909	GRB2_HUMAN_Faure_2021	320	4	ndcg	0.641983	Local-single	Zero Shot	ESM-1v
910	GFP_AEQVI_Sarkisyan_2016	20	4	ndcg	0.160926	Local-single	Zero Shot	ESM-1v
911	GCN4_YEAST_Staller_induction_2018	20	5	ndcg	0.472669	Local-single	Zero Shot	ESM-1v
912	A4_HUMAN_Seuma_2021	320	3	ndcg	0.16422	Compound-multi	Zero Shot	ESM-1v
913	GRB2_HUMAN_Faure_2021	320	2	ndcg	0.694322	Compound-multi	Zero Shot	ESM-1v
914	SPG1_STRSG_Olson_2014	20	1	ndcg	0.467282	Compound-multi	Zero Shot	ESM-1v
915	GRB2_HUMAN_Faure_2021	160	2	ndcg	0.561395	Compound-multi	Zero Shot	ESM-1v
916	PABP_YEAST_Melamed_2013	20	2	ndcg	0.371394	Local-single	Zero Shot	ESM-1v
917	HIS7_YEAST_Pokusaeva_2019	20	2	ndcg	1.75673	Compound-multi	Zero Shot	ESM-1v
918	A4_HUMAN_Seuma_2021	160	3	ndcg	0.417284	Local-single	Zero Shot	ESM-1v
919	SPG1_STRSG_Olson_2014	320	5	ndcg	0.616063	Compound-multi	Zero Shot	ESM-1v
920	DLG4_HUMAN_Faure_2021	80	4	ndcg	0.590502	Local-single	Zero Shot	ESM-1v
921	A4_HUMAN_Seuma_2021	320	3	ndcg	0.376208	Local-single	Zero Shot	ESM-1v
922	PABP_YEAST_Melamed_2013	20	2	ndcg	0.172966	Compound-multi	Zero Shot	ESM-1v
923	DLG4_HUMAN_Faure_2021	160	4	ndcg	0.113837	Compound-multi	Zero Shot	ESM-1v
924	PABP_YEAST_Melamed_2013	160	5	ndcg	0.524288	Local-single	Zero Shot	ESM-1v
925	HIS7_YEAST_Pokusaeva_2019	40	2	ndcg	0.475972	Compound-multi	Zero Shot	ESM-1v
926	GRB2_HUMAN_Faure_2021	160	4	ndcg	0.796027	Local-single	Zero Shot	ESM-1v
927	PABP_YEAST_Melamed_2013	320	1	ndcg	0.340778	Local-single	Zero Shot	ESM-1v
928	GFP_AEQVI_Sarkisyan_2016	40	2	ndcg	0.530974	Local-single	Zero Shot	ESM-1v
929	CAPSD_AAV2S_Sinai_substitutions_2021	20	1	ndcg	0.444038	Local-single	Zero Shot	ESM-1v
930	HIS7_YEAST_Pokusaeva_2019	80	1	ndcg	0.252386	Compound-multi	Zero Shot	ESM-1v
931	A4_HUMAN_Seuma_2021	160	3	ndcg	0.193837	Compound-multi	Zero Shot	ESM-1v
932	HIS7_YEAST_Pokusaeva_2019	20	2	ndcg	0.0478592	Local-single	Zero Shot	ESM-1v
933	F7YBW8_MESOW_Aakre_2015	20	5	ndcg	0.778311	Compound-multi	Zero Shot	ESM-1v
934	DLG4_HUMAN_Faure_2021	80	4	ndcg	0.1589	Compound-multi	Zero Shot	ESM-1v
935	GFP_AEQVI_Sarkisyan_2016	40	2	ndcg	0.237783	Compound-multi	Zero Shot	ESM-1v
936	GRB2_HUMAN_Faure_2021	40	5	ndcg	0.723861	Local-single	Zero Shot	ESM-1v
937	DLG4_HUMAN_Faure_2021	20	4	ndcg	0.0757528	Local-single	Zero Shot	ESM-1v
938	A4_HUMAN_Seuma_2021	160	4	ndcg	0.417549	Local-single	Zero Shot	ESM-1v
939	SPG1_STRSG_Olson_2014	40	1	ndcg	0.326684	Compound-multi	Zero Shot	ESM-1v
940	A4_HUMAN_Seuma_2021	80	3	ndcg	0.165334	Compound-multi	Zero Shot	ESM-1v
941	GRB2_HUMAN_Faure_2021	320	3	ndcg	0.660511	Local-single	Zero Shot	ESM-1v
942	HIS7_YEAST_Pokusaeva_2019	80	5	ndcg	0.734974	Compound-multi	Zero Shot	ESM-1v
943	PABP_YEAST_Melamed_2013	20	4	ndcg	0.102606	Local-single	Zero Shot	ESM-1v
944	PABP_YEAST_Melamed_2013	40	3	ndcg	0.449746	Local-single	Zero Shot	ESM-1v
945	A4_HUMAN_Seuma_2021	40	1	ndcg	0.0418163	Compound-multi	Zero Shot	ESM-1v
946	HIS7_YEAST_Pokusaeva_2019	40	3	ndcg	0.087731	Local-single	Zero Shot	ESM-1v
947	GRB2_HUMAN_Faure_2021	20	4	ndcg	0.66128	Local-single	Zero Shot	ESM-1v
948	A4_HUMAN_Seuma_2021	40	2	ndcg	0.198352	Compound-multi	Zero Shot	ESM-1v
949	GRB2_HUMAN_Faure_2021	160	3	ndcg	0.746604	Compound-multi	Zero Shot	ESM-1v
950	PABP_YEAST_Melamed_2013	40	4	ndcg	0.609046	Compound-multi	Zero Shot	ESM-1v
951	PABP_YEAST_Melamed_2013	40	3	ndcg	0.683453	Compound-multi	Zero Shot	ESM-1v
952	F7YBW8_MESOW_Aakre_2015	20	2	ndcg	0.835863	Compound-multi	Zero Shot	ESM-1v
953	GFP_AEQVI_Sarkisyan_2016	320	3	ndcg	0.476997	Compound-multi	Zero Shot	ESM-1v
954	A4_HUMAN_Seuma_2021	20	1	ndcg	0.23912	Local-single	Zero Shot	ESM-1v
955	HIS7_YEAST_Pokusaeva_2019	40	4	ndcg	0.676354	Local-single	Zero Shot	ESM-1v
956	GFP_AEQVI_Sarkisyan_2016	160	2	ndcg	0.0819667	Compound-multi	Zero Shot	ESM-1v
957	PABP_YEAST_Melamed_2013	40	1	ndcg	0.859091	Local-single	Zero Shot	ESM-1v
958	A4_HUMAN_Seuma_2021	40	2	ndcg	0.295761	Local-single	Zero Shot	ESM-1v
959	A4_HUMAN_Seuma_2021	20	1	ndcg	0.182139	Compound-multi	Zero Shot	ESM-1v
960	SPG1_STRSG_Olson_2014	80	5	ndcg	0.134401	Compound-multi	Zero Shot	ESM-1v
961	DLG4_HUMAN_Faure_2021	320	5	ndcg	0.720511	Compound-multi	Zero Shot	ESM-1v
962	A4_HUMAN_Seuma_2021	80	2	ndcg	0.057083	Compound-multi	Zero Shot	ESM-1v
963	PABP_YEAST_Melamed_2013	80	4	ndcg	0.579191	Compound-multi	Zero Shot	ESM-1v
964	HIS7_YEAST_Pokusaeva_2019	80	4	ndcg	0.24885	Compound-multi	Zero Shot	ESM-1v
965	DLG4_HUMAN_Faure_2021	320	5	ndcg	0.764459	Local-single	Zero Shot	ESM-1v
966	GFP_AEQVI_Sarkisyan_2016	320	3	ndcg	0.0316246	Local-single	Zero Shot	ESM-1v
967	GRB2_HUMAN_Faure_2021	80	3	ndcg	0.752405	Local-single	Zero Shot	ESM-1v
968	GRB2_HUMAN_Faure_2021	40	4	ndcg	0.401741	Compound-multi	Zero Shot	ESM-1v
969	PABP_YEAST_Melamed_2013	20	3	ndcg	0.319456	Local-single	Zero Shot	ESM-1v
970	SPG1_STRSG_Olson_2014	160	5	ndcg	0.403535	Compound-multi	Zero Shot	ESM-1v
971	PABP_YEAST_Melamed_2013	40	4	ndcg	0.638761	Local-single	Zero Shot	ESM-1v
972	GRB2_HUMAN_Faure_2021	40	5	ndcg	0.332786	Compound-multi	Zero Shot	ESM-1v
973	HIS7_YEAST_Pokusaeva_2019	40	3	ndcg	0.307612	Compound-multi	Zero Shot	ESM-1v
974	F7YBW8_MESOW_Aakre_2015	20	3	ndcg	0.844866	Local-single	Zero Shot	ESM-1v
975	PABP_YEAST_Melamed_2013	20	3	ndcg	0.362222	Compound-multi	Zero Shot	ESM-1v
976	HIS7_YEAST_Pokusaeva_2019	40	4	ndcg	0.604893	Compound-multi	Zero Shot	ESM-1v
977	A4_HUMAN_Seuma_2021	20	2	ndcg	0.413916	Local-single	Zero Shot	ESM-1v
978	HIS7_YEAST_Pokusaeva_2019	80	3	ndcg	0.686905	Local-single	Zero Shot	ESM-1v
979	A4_HUMAN_Seuma_2021	320	1	ndcg	0.278298	Compound-multi	Zero Shot	ESM-1v
980	A4_HUMAN_Seuma_2021	160	1	ndcg	0.258034	Local-single	Zero Shot	ESM-1v
981	PABP_YEAST_Melamed_2013	80	1	ndcg	0.654723	Compound-multi	Zero Shot	ESM-1v
982	PABP_YEAST_Melamed_2013	160	3	ndcg	0.682765	Local-single	Zero Shot	ESM-1v
983	PABP_YEAST_Melamed_2013	160	3	ndcg	0.704474	Compound-multi	Zero Shot	ESM-1v
984	F7YBW8_MESOW_Aakre_2015	20	2	ndcg	0.844866	Local-single	Zero Shot	ESM-1v
985	HIS7_YEAST_Pokusaeva_2019	20	4	ndcg	0.0309204	Compound-multi	Zero Shot	ESM-1v
986	HIS7_YEAST_Pokusaeva_2019	40	1	ndcg	0.200154	Local-single	Zero Shot	ESM-1v
987	A4_HUMAN_Seuma_2021	160	1	ndcg	0.307762	Compound-multi	Zero Shot	ESM-1v
988	A4_HUMAN_Seuma_2021	320	1	ndcg	0.375175	Local-single	Zero Shot	ESM-1v
989	PABP_YEAST_Melamed_2013	320	3	ndcg	0.386495	Compound-multi	Zero Shot	ESM-1v
990	SPG1_STRSG_Olson_2014	80	5	ndcg	0.25396	Local-single	Zero Shot	ESM-1v
991	GRB2_HUMAN_Faure_2021	320	3	ndcg	0.631735	Compound-multi	Zero Shot	ESM-1v
992	PABP_YEAST_Melamed_2013	80	3	ndcg	0.468539	Local-single	Zero Shot	ESM-1v
993	A4_HUMAN_Seuma_2021	80	1	ndcg	0.262139	Local-single	Zero Shot	ESM-1v
994	GRB2_HUMAN_Faure_2021	20	4	ndcg	0.912106	Compound-multi	Zero Shot	ESM-1v
995	A4_HUMAN_Seuma_2021	40	1	ndcg	0.0256114	Local-single	Zero Shot	ESM-1v
996	GFP_AEQVI_Sarkisyan_2016	320	2	ndcg	0.36139	Compound-multi	Zero Shot	ESM-1v
997	A4_HUMAN_Seuma_2021	40	4	ndcg	0.311849	Local-single	Zero Shot	ESM-1v
998	PABP_YEAST_Melamed_2013	20	4	ndcg	0.541369	Compound-multi	Zero Shot	ESM-1v
999	GRB2_HUMAN_Faure_2021	160	3	ndcg	0.741592	Local-single	Zero Shot	ESM-1v
1000	F7YBW8_MESOW_Aakre_2015	20	3	ndcg	0.662792	Compound-multi	Zero Shot	ESM-1v
1001	A4_HUMAN_Seuma_2021	80	4	ndcg	0.189138	Compound-multi	Zero Shot	ESM-1v
1002	PABP_YEAST_Melamed_2013	80	3	ndcg	0.396232	Compound-multi	Zero Shot	ESM-1v
1003	A4_HUMAN_Seuma_2021	80	1	ndcg	0.208944	Compound-multi	Zero Shot	ESM-1v
1004	CAPSD_AAV2S_Sinai_substitutions_2021	40	1	ndcg	0.150053	Compound-multi	Zero Shot	ESM-1v
1005	HIS7_YEAST_Pokusaeva_2019	20	4	ndcg	0.559456	Local-single	Zero Shot	ESM-1v
1006	HIS7_YEAST_Pokusaeva_2019	80	3	ndcg	0.683962	Compound-multi	Zero Shot	ESM-1v
1007	PABP_YEAST_Melamed_2013	320	3	ndcg	0.505165	Local-single	Zero Shot	ESM-1v
1008	GFP_AEQVI_Sarkisyan_2016	160	2	ndcg	1.52345	Local-single	Zero Shot	ESM-1v
1009	A4_HUMAN_Seuma_2021	20	2	ndcg	0.302834	Compound-multi	Zero Shot	ESM-1v
1010	HIS7_YEAST_Pokusaeva_2019	40	2	ndcg	0.0857842	Local-single	Zero Shot	ESM-1v
1011	A4_HUMAN_Seuma_2021	80	2	ndcg	0.299486	Local-single	Zero Shot	ESM-1v
1012	HIS7_YEAST_Pokusaeva_2019	20	3	ndcg	0.392559	Local-single	Zero Shot	ESM-1v
1013	PABP_YEAST_Melamed_2013	320	4	ndcg	0.375654	Local-single	Zero Shot	ESM-1v
1014	PABP_YEAST_Melamed_2013	160	2	ndcg	0.189104	Compound-multi	Zero Shot	ESM-1v
1015	GRB2_HUMAN_Faure_2021	80	4	ndcg	0.533022	Local-single	Zero Shot	ESM-1v
1016	GFP_AEQVI_Sarkisyan_2016	160	3	ndcg	0.461977	Local-single	Zero Shot	ESM-1v
1017	DLG4_HUMAN_Faure_2021	40	5	ndcg	0.266681	Compound-multi	Zero Shot	ESM-1v
1018	PABP_YEAST_Melamed_2013	20	5	ndcg	0.515971	Compound-multi	Zero Shot	ESM-1v
1019	HIS7_YEAST_Pokusaeva_2019	40	5	ndcg	0.46805	Compound-multi	Zero Shot	ESM-1v
1020	A4_HUMAN_Seuma_2021	20	3	ndcg	0.357126	Compound-multi	Zero Shot	ESM-1v
1021	GFP_AEQVI_Sarkisyan_2016	20	3	ndcg	0.138406	Compound-multi	Zero Shot	ESM-1v
1022	HIS7_YEAST_Pokusaeva_2019	80	2	ndcg	0.531239	Compound-multi	Zero Shot	ESM-1v
1023	DLG4_HUMAN_Faure_2021	20	5	ndcg	0.514769	Local-single	Zero Shot	ESM-1v
1024	PABP_YEAST_Melamed_2013	80	2	ndcg	0.37592	Local-single	Zero Shot	ESM-1v
1025	GRB2_HUMAN_Faure_2021	20	3	ndcg	0.671829	Local-single	Zero Shot	ESM-1v
1026	PABP_YEAST_Melamed_2013	20	5	ndcg	0.234607	Local-single	Zero Shot	ESM-1v
1027	A4_HUMAN_Seuma_2021	20	3	ndcg	0.276247	Local-single	Zero Shot	ESM-1v
1028	F7YBW8_MESOW_Aakre_2015	20	4	ndcg	0.844866	Local-single	Zero Shot	ESM-1v
1029	PABP_YEAST_Melamed_2013	40	1	ndcg	0.435162	Compound-multi	Zero Shot	ESM-1v
1030	A4_HUMAN_Seuma_2021	40	3	ndcg	0.552013	Compound-multi	Zero Shot	ESM-1v
1031	PABP_YEAST_Melamed_2013	40	5	ndcg	0.556533	Local-single	Zero Shot	ESM-1v
1032	GRB2_HUMAN_Faure_2021	20	3	ndcg	0.661535	Compound-multi	Zero Shot	ESM-1v
1033	GFP_AEQVI_Sarkisyan_2016	80	2	ndcg	1.53736	Compound-multi	Zero Shot	ESM-1v
1034	DLG4_HUMAN_Faure_2021	320	4	ndcg	0.712482	Local-single	Zero Shot	ESM-1v
1035	SPG1_STRSG_Olson_2014	40	5	ndcg	0.0776167	Local-single	Zero Shot	ESM-1v
1036	A4_HUMAN_Seuma_2021	320	2	ndcg	0.366767	Local-single	Zero Shot	ESM-1v
1037	GRB2_HUMAN_Faure_2021	160	4	ndcg	0.590129	Compound-multi	Zero Shot	ESM-1v
1038	SPG1_STRSG_Olson_2014	160	5	ndcg	0.436212	Local-single	Zero Shot	ESM-1v
1039	F7YBW8_MESOW_Aakre_2015	20	1	ndcg	0.848845	Compound-multi	Zero Shot	ESM-1v
1040	PABP_YEAST_Melamed_2013	40	5	ndcg	0.375493	Compound-multi	Zero Shot	ESM-1v
1041	HIS7_YEAST_Pokusaeva_2019	40	5	ndcg	0.416173	Local-single	Zero Shot	ESM-1v
1042	DLG4_HUMAN_Faure_2021	20	5	ndcg	0.830279	Compound-multi	Zero Shot	ESM-1v
1043	GFP_AEQVI_Sarkisyan_2016	40	3	ndcg	0.524223	Compound-multi	Zero Shot	ESM-1v
1044	PABP_YEAST_Melamed_2013	80	2	ndcg	0.492732	Compound-multi	Zero Shot	ESM-1v
1045	PABP_YEAST_Melamed_2013	80	4	ndcg	0.597455	Local-single	Zero Shot	ESM-1v
1046	HIS7_YEAST_Pokusaeva_2019	80	2	ndcg	0.336029	Local-single	Zero Shot	ESM-1v
1047	A4_HUMAN_Seuma_2021	40	4	ndcg	0.0110423	Compound-multi	Zero Shot	ESM-1v
1048	GFP_AEQVI_Sarkisyan_2016	320	2	ndcg	0.275034	Local-single	Zero Shot	ESM-1v
1049	GRB2_HUMAN_Faure_2021	80	3	ndcg	0.685789	Compound-multi	Zero Shot	ESM-1v
1050	HIS7_YEAST_Pokusaeva_2019	80	4	ndcg	0.214523	Local-single	Zero Shot	ESM-1v
1051	GRB2_HUMAN_Faure_2021	40	4	ndcg	0.879277	Local-single	Zero Shot	ESM-1v
1052	DLG4_HUMAN_Faure_2021	160	5	ndcg	0.72709	Local-single	Zero Shot	ESM-1v
1053	PABP_YEAST_Melamed_2013	320	2	ndcg	0.519284	Local-single	Zero Shot	ESM-1v
1054	A4_HUMAN_Seuma_2021	160	2	ndcg	0.135875	Compound-multi	Zero Shot	ESM-1v
1055	PABP_YEAST_Melamed_2013	160	4	ndcg	0.386798	Compound-multi	Zero Shot	ESM-1v
1056	GRB2_HUMAN_Faure_2021	20	5	ndcg	0.867074	Local-single	Zero Shot	ESM-1v
1057	DLG4_HUMAN_Faure_2021	160	5	ndcg	0.756072	Compound-multi	Zero Shot	ESM-1v
1058	HIS7_YEAST_Pokusaeva_2019	40	1	ndcg	0.809139	Compound-multi	Zero Shot	ESM-1v
1059	F7YBW8_MESOW_Aakre_2015	20	1	ndcg	0.85675	Local-single	Zero Shot	ESM-1v
1060	PABP_YEAST_Melamed_2013	160	4	ndcg	0.557488	Local-single	Zero Shot	ESM-1v
1061	GFP_AEQVI_Sarkisyan_2016	80	2	ndcg	1.61967	Local-single	Zero Shot	ESM-1v
1062	HIS7_YEAST_Pokusaeva_2019	20	3	ndcg	0.878444	Compound-multi	Zero Shot	ESM-1v
1063	A4_HUMAN_Seuma_2021	160	2	ndcg	0.322084	Local-single	Zero Shot	ESM-1v
1064	HIS7_YEAST_Pokusaeva_2019	20	5	ndcg	0.861354	Compound-multi	Zero Shot	ESM-1v
1065	DLG4_HUMAN_Faure_2021	40	5	ndcg	0.620772	Local-single	Zero Shot	ESM-1v
1066	PABP_YEAST_Melamed_2013	160	2	ndcg	0.466964	Local-single	Zero Shot	ESM-1v
1067	GCN4_YEAST_Staller_induction_2018	20	3	ndcg	0.472669	Local-single	Zero Shot	ESM-1v
1068	HIS7_YEAST_Pokusaeva_2019	20	5	ndcg	0.625171	Local-single	Zero Shot	ESM-1v
1069	GFP_AEQVI_Sarkisyan_2016	20	4	ndcg	0.213779	Compound-multi	Zero Shot	ESM-1v
1070	A4_HUMAN_Seuma_2021	320	2	ndcg	0.258588	Compound-multi	Zero Shot	ESM-1v
1071	GRB2_HUMAN_Faure_2021	40	3	ndcg	0.24627	Compound-multi	Zero Shot	ESM-1v
1072	DLG4_HUMAN_Faure_2021	80	5	ndcg	0.417727	Compound-multi	Zero Shot	ESM-1v
1073	GRB2_HUMAN_Faure_2021	80	4	ndcg	0.667873	Compound-multi	Zero Shot	ESM-1v
1074	F7YBW8_MESOW_Aakre_2015	20	4	ndcg	0.826253	Compound-multi	Zero Shot	ESM-1v
1075	A4_HUMAN_Seuma_2021	80	4	ndcg	0.339738	Local-single	Zero Shot	ESM-1v
1076	GRB2_HUMAN_Faure_2021	40	3	ndcg	0.419789	Local-single	Zero Shot	ESM-1v
1077	PABP_YEAST_Melamed_2013	320	2	ndcg	0.345934	Compound-multi	Zero Shot	ESM-1v
1078	DLG4_HUMAN_Faure_2021	80	5	ndcg	0.731524	Local-single	Zero Shot	ESM-1v
1079	PABP_YEAST_Melamed_2013	320	4	ndcg	0.551375	Compound-multi	Zero Shot	ESM-1v
1080	PABP_YEAST_Melamed_2013	80	1	ndcg	0.822328	Local-single	Zero Shot	ESM-1v
1081	GRB2_HUMAN_Faure_2021	80	2	ndcg	0.731535	Compound-multi	Zero Shot	ESM-1v
1082	DLG4_HUMAN_Faure_2021	320	3	ndcg	0.506799	Compound-multi	Zero Shot	ESM-1v
1083	CAPSD_AAV2S_Sinai_substitutions_2021	320	2	ndcg	0.116023	Local-single	Zero Shot	ESM-1v
1084	YAP1_HUMAN_Araya_2012	80	1	ndcg	0.23179	Compound-multi	Zero Shot	ESM-1v
1085	SPG1_STRSG_Olson_2014	160	3	ndcg	0.280454	Local-single	Zero Shot	ESM-1v
1086	DLG4_HUMAN_Faure_2021	320	1	ndcg	0.699966	Local-single	Zero Shot	ESM-1v
1087	CAPSD_AAV2S_Sinai_substitutions_2021	320	4	ndcg	0.695804	Local-single	Zero Shot	ESM-1v
1088	SPG1_STRSG_Olson_2014	80	2	ndcg	0.126389	Compound-multi	Zero Shot	ESM-1v
1089	YAP1_HUMAN_Araya_2012	40	4	ndcg	0.191641	Compound-multi	Zero Shot	ESM-1v
1090	CAPSD_AAV2S_Sinai_substitutions_2021	320	2	ndcg	0.0944537	Compound-multi	Zero Shot	ESM-1v
1091	GRB2_HUMAN_Faure_2021	160	1	ndcg	0.542423	Compound-multi	Zero Shot	ESM-1v
1092	GCN4_YEAST_Staller_induction_2018	20	2	ndcg	0.472669	Local-single	Zero Shot	ESM-1v
1093	DLG4_HUMAN_Faure_2021	20	2	ndcg	0.322991	Compound-multi	Zero Shot	ESM-1v
1094	GFP_AEQVI_Sarkisyan_2016	80	5	ndcg	0.764799	Compound-multi	Zero Shot	ESM-1v
1095	GFP_AEQVI_Sarkisyan_2016	320	1	ndcg	0.850055	Compound-multi	Zero Shot	ESM-1v
1096	CAPSD_AAV2S_Sinai_substitutions_2021	20	5	ndcg	0.231992	Compound-multi	Zero Shot	ESM-1v
1097	YAP1_HUMAN_Araya_2012	20	4	ndcg	0.422315	Local-single	Zero Shot	ESM-1v
1098	CAPSD_AAV2S_Sinai_substitutions_2021	160	2	ndcg	0.0329476	Local-single	Zero Shot	ESM-1v
1099	GRB2_HUMAN_Faure_2021	160	5	ndcg	0.656783	Compound-multi	Zero Shot	ESM-1v
1100	DLG4_HUMAN_Faure_2021	320	1	ndcg	0.421713	Compound-multi	Zero Shot	ESM-1v
1101	DLG4_HUMAN_Faure_2021	160	1	ndcg	0.288151	Compound-multi	Zero Shot	ESM-1v
1102	SPG1_STRSG_Olson_2014	160	3	ndcg	0.179182	Compound-multi	Zero Shot	ESM-1v
1103	CAPSD_AAV2S_Sinai_substitutions_2021	20	3	ndcg	0.551285	Local-single	Zero Shot	ESM-1v
1104	GFP_AEQVI_Sarkisyan_2016	80	4	ndcg	0.00385545	Compound-multi	Zero Shot	ESM-1v
1105	A4_HUMAN_Seuma_2021	20	5	ndcg	0.13911	Compound-multi	Zero Shot	ESM-1v
1106	DLG4_HUMAN_Faure_2021	160	1	ndcg	0.386693	Local-single	Zero Shot	ESM-1v
1107	YAP1_HUMAN_Araya_2012	20	2	ndcg	0.497004	Local-single	Zero Shot	ESM-1v
1108	GFP_AEQVI_Sarkisyan_2016	80	5	ndcg	0.0059179	Local-single	Zero Shot	ESM-1v
1109	SPG1_STRSG_Olson_2014	320	4	ndcg	0.769877	Local-single	Zero Shot	ESM-1v
1110	CAPSD_AAV2S_Sinai_substitutions_2021	320	4	ndcg	0.222524	Compound-multi	Zero Shot	ESM-1v
1111	SPG1_STRSG_Olson_2014	80	2	ndcg	0.740147	Local-single	Zero Shot	ESM-1v
1112	CAPSD_AAV2S_Sinai_substitutions_2021	20	3	ndcg	0.738821	Compound-multi	Zero Shot	ESM-1v
1113	GRB2_HUMAN_Faure_2021	80	1	ndcg	0.686422	Local-single	Zero Shot	ESM-1v
1114	A4_HUMAN_Seuma_2021	160	5	ndcg	0.215045	Compound-multi	Zero Shot	ESM-1v
1115	YAP1_HUMAN_Araya_2012	40	4	ndcg	0.428472	Local-single	Zero Shot	ESM-1v
1116	YAP1_HUMAN_Araya_2012	80	4	ndcg	0.00676542	Compound-multi	Zero Shot	ESM-1v
1117	SPG1_STRSG_Olson_2014	320	3	ndcg	0.176371	Compound-multi	Zero Shot	ESM-1v
1118	SPG1_STRSG_Olson_2014	40	2	ndcg	0.000221582	Local-single	Zero Shot	ESM-1v
1119	SPG1_STRSG_Olson_2014	320	3	ndcg	0.0369593	Local-single	Zero Shot	ESM-1v
1120	CAPSD_AAV2S_Sinai_substitutions_2021	80	2	ndcg	0.102481	Compound-multi	Zero Shot	ESM-1v
1121	GFP_AEQVI_Sarkisyan_2016	320	1	ndcg	0.361738	Local-single	Zero Shot	ESM-1v
1122	A4_HUMAN_Seuma_2021	320	5	ndcg	0.376908	Local-single	Zero Shot	ESM-1v
1123	YAP1_HUMAN_Araya_2012	160	3	ndcg	0.0596481	Compound-multi	Zero Shot	ESM-1v
1124	SPG1_STRSG_Olson_2014	20	2	ndcg	0.6096	Local-single	Zero Shot	ESM-1v
1125	DLG4_HUMAN_Faure_2021	80	2	ndcg	0.44029	Compound-multi	Zero Shot	ESM-1v
1126	YAP1_HUMAN_Araya_2012	40	2	ndcg	0.169003	Compound-multi	Zero Shot	ESM-1v
1127	GFP_AEQVI_Sarkisyan_2016	40	5	ndcg	0.0581792	Compound-multi	Zero Shot	ESM-1v
1128	SPG1_STRSG_Olson_2014	20	5	ndcg	0.222545	Compound-multi	Zero Shot	ESM-1v
1129	YAP1_HUMAN_Araya_2012	80	3	ndcg	0.167485	Local-single	Zero Shot	ESM-1v
1130	CAPSD_AAV2S_Sinai_substitutions_2021	40	2	ndcg	0.674986	Local-single	Zero Shot	ESM-1v
1131	GFP_AEQVI_Sarkisyan_2016	40	4	ndcg	0.825541	Local-single	Zero Shot	ESM-1v
1132	GRB2_HUMAN_Faure_2021	320	1	ndcg	0.746792	Local-single	Zero Shot	ESM-1v
1133	DLG4_HUMAN_Faure_2021	80	2	ndcg	0.410168	Local-single	Zero Shot	ESM-1v
1134	DLG4_HUMAN_Faure_2021	20	2	ndcg	0.798278	Local-single	Zero Shot	ESM-1v
1135	CAPSD_AAV2S_Sinai_substitutions_2021	40	5	ndcg	0.164377	Compound-multi	Zero Shot	ESM-1v
1136	A4_HUMAN_Seuma_2021	40	5	ndcg	0.526396	Local-single	Zero Shot	ESM-1v
1137	YAP1_HUMAN_Araya_2012	20	4	ndcg	0.0610787	Compound-multi	Zero Shot	ESM-1v
1138	GFP_AEQVI_Sarkisyan_2016	80	3	ndcg	0.659701	Compound-multi	Zero Shot	ESM-1v
1139	GRB2_HUMAN_Faure_2021	160	1	ndcg	0.834116	Local-single	Zero Shot	ESM-1v
1140	DLG4_HUMAN_Faure_2021	40	2	ndcg	0.626189	Compound-multi	Zero Shot	ESM-1v
1141	GFP_AEQVI_Sarkisyan_2016	40	1	ndcg	0.865444	Local-single	Zero Shot	ESM-1v
1142	CAPSD_AAV2S_Sinai_substitutions_2021	20	5	ndcg	0.227213	Local-single	Zero Shot	ESM-1v
1143	GRB2_HUMAN_Faure_2021	320	1	ndcg	0.693726	Compound-multi	Zero Shot	ESM-1v
1144	SPG1_STRSG_Olson_2014	40	2	ndcg	0.201895	Compound-multi	Zero Shot	ESM-1v
1145	YAP1_HUMAN_Araya_2012	160	3	ndcg	0.143635	Local-single	Zero Shot	ESM-1v
1146	GFP_AEQVI_Sarkisyan_2016	40	5	ndcg	0.341437	Local-single	Zero Shot	ESM-1v
1147	CAPSD_AAV2S_Sinai_substitutions_2021	80	2	ndcg	0.435571	Local-single	Zero Shot	ESM-1v
1148	SPG1_STRSG_Olson_2014	160	4	ndcg	0.688781	Compound-multi	Zero Shot	ESM-1v
1149	YAP1_HUMAN_Araya_2012	40	1	ndcg	0.254406	Local-single	Zero Shot	ESM-1v
1150	A4_HUMAN_Seuma_2021	320	4	ndcg	0.343971	Local-single	Zero Shot	ESM-1v
1151	DLG4_HUMAN_Faure_2021	40	2	ndcg	0.556935	Local-single	Zero Shot	ESM-1v
1152	DLG4_HUMAN_Faure_2021	160	2	ndcg	0.629915	Compound-multi	Zero Shot	ESM-1v
1153	SPG1_STRSG_Olson_2014	160	2	ndcg	0.544976	Compound-multi	Zero Shot	ESM-1v
1154	CAPSD_AAV2S_Sinai_substitutions_2021	160	4	ndcg	0.0838366	Local-single	Zero Shot	ESM-1v
1155	GFP_AEQVI_Sarkisyan_2016	160	1	ndcg	0.00798568	Compound-multi	Zero Shot	ESM-1v
1156	CAPSD_AAV2S_Sinai_substitutions_2021	320	3	ndcg	0.026435	Compound-multi	Zero Shot	ESM-1v
1157	SPG1_STRSG_Olson_2014	20	3	ndcg	0.452565	Compound-multi	Zero Shot	ESM-1v
1158	YAP1_HUMAN_Araya_2012	20	5	ndcg	0.26547	Local-single	Zero Shot	ESM-1v
1159	A4_HUMAN_Seuma_2021	20	5	ndcg	0.485849	Local-single	Zero Shot	ESM-1v
1160	SPG1_STRSG_Olson_2014	320	4	ndcg	0.716669	Compound-multi	Zero Shot	ESM-1v
1161	SPG1_STRSG_Olson_2014	40	3	ndcg	0.273654	Local-single	Zero Shot	ESM-1v
1162	YAP1_HUMAN_Araya_2012	160	5	ndcg	0.132289	Local-single	Zero Shot	ESM-1v
1163	CAPSD_AAV2S_Sinai_substitutions_2021	160	3	ndcg	0.79391	Local-single	Zero Shot	ESM-1v
1164	GRB2_HUMAN_Faure_2021	20	1	ndcg	0.570909	Local-single	Zero Shot	ESM-1v
1165	YAP1_HUMAN_Araya_2012	20	5	ndcg	0.115552	Compound-multi	Zero Shot	ESM-1v
1166	YAP1_HUMAN_Araya_2012	160	1	ndcg	0.0339659	Compound-multi	Zero Shot	ESM-1v
1167	DLG4_HUMAN_Faure_2021	20	1	ndcg	0.524625	Compound-multi	Zero Shot	ESM-1v
1168	GFP_AEQVI_Sarkisyan_2016	160	5	ndcg	0.132696	Local-single	Zero Shot	ESM-1v
1169	CAPSD_AAV2S_Sinai_substitutions_2021	40	4	ndcg	0.43921	Local-single	Zero Shot	ESM-1v
1170	CAPSD_AAV2S_Sinai_substitutions_2021	80	4	ndcg	0.298481	Compound-multi	Zero Shot	ESM-1v
1171	GFP_AEQVI_Sarkisyan_2016	320	5	ndcg	0.0181514	Compound-multi	Zero Shot	ESM-1v
1172	CAPSD_AAV2S_Sinai_substitutions_2021	40	4	ndcg	0.135419	Compound-multi	Zero Shot	ESM-1v
1173	YAP1_HUMAN_Araya_2012	160	1	ndcg	0.190766	Local-single	Zero Shot	ESM-1v
1174	GFP_AEQVI_Sarkisyan_2016	320	5	ndcg	0.0908425	Local-single	Zero Shot	ESM-1v
1175	YAP1_HUMAN_Araya_2012	40	5	ndcg	0.0935406	Local-single	Zero Shot	ESM-1v
1176	CAPSD_AAV2S_Sinai_substitutions_2021	20	4	ndcg	0.388298	Compound-multi	Zero Shot	ESM-1v
1177	YAP1_HUMAN_Araya_2012	80	5	ndcg	0.0206445	Compound-multi	Zero Shot	ESM-1v
1178	SPG1_STRSG_Olson_2014	40	3	ndcg	0.312781	Compound-multi	Zero Shot	ESM-1v
1179	YAP1_HUMAN_Araya_2012	160	5	ndcg	0.171424	Compound-multi	Zero Shot	ESM-1v
1180	CAPSD_AAV2S_Sinai_substitutions_2021	20	4	ndcg	0.756445	Local-single	Zero Shot	ESM-1v
1181	GFP_AEQVI_Sarkisyan_2016	80	1	ndcg	0.0329022	Local-single	Zero Shot	ESM-1v
1182	YAP1_HUMAN_Araya_2012	80	5	ndcg	0.237306	Local-single	Zero Shot	ESM-1v
1183	CAPSD_AAV2S_Sinai_substitutions_2021	320	3	ndcg	0.016016	Local-single	Zero Shot	ESM-1v
1184	YAP1_HUMAN_Araya_2012	40	5	ndcg	0.155178	Compound-multi	Zero Shot	ESM-1v
1185	GFP_AEQVI_Sarkisyan_2016	80	4	ndcg	0.0168469	Local-single	Zero Shot	ESM-1v
1186	GRB2_HUMAN_Faure_2021	20	1	ndcg	0.277824	Compound-multi	Zero Shot	ESM-1v
1187	SPG1_STRSG_Olson_2014	20	3	ndcg	0.702808	Local-single	Zero Shot	ESM-1v
1188	GRB2_HUMAN_Faure_2021	80	1	ndcg	0.274545	Compound-multi	Zero Shot	ESM-1v
1189	SPG1_STRSG_Olson_2014	320	2	ndcg	0.605504	Local-single	Zero Shot	ESM-1v
1190	SPG1_STRSG_Olson_2014	160	4	ndcg	0.686644	Local-single	Zero Shot	ESM-1v
1191	GRB2_HUMAN_Faure_2021	40	1	ndcg	0.809046	Local-single	Zero Shot	ESM-1v
1192	GFP_AEQVI_Sarkisyan_2016	160	5	ndcg	0.00232418	Compound-multi	Zero Shot	ESM-1v
1193	SPG1_STRSG_Olson_2014	160	2	ndcg	0.388811	Local-single	Zero Shot	ESM-1v
1194	DLG4_HUMAN_Faure_2021	80	1	ndcg	0.552877	Compound-multi	Zero Shot	ESM-1v
1195	CAPSD_AAV2S_Sinai_substitutions_2021	40	3	ndcg	0.691876	Local-single	Zero Shot	ESM-1v
1196	YAP1_HUMAN_Araya_2012	80	4	ndcg	0.184148	Local-single	Zero Shot	ESM-1v
1197	GRB2_HUMAN_Faure_2021	320	5	ndcg	0.620831	Local-single	Zero Shot	ESM-1v
1198	CAPSD_AAV2S_Sinai_substitutions_2021	160	4	ndcg	0.185849	Compound-multi	Zero Shot	ESM-1v
1199	GFP_AEQVI_Sarkisyan_2016	160	1	ndcg	0.0184556	Local-single	Zero Shot	ESM-1v
1200	GRB2_HUMAN_Faure_2021	320	5	ndcg	0.61716	Compound-multi	Zero Shot	ESM-1v
1201	DLG4_HUMAN_Faure_2021	80	1	ndcg	0.797103	Local-single	Zero Shot	ESM-1v
1202	GFP_AEQVI_Sarkisyan_2016	80	1	ndcg	0.340667	Compound-multi	Zero Shot	ESM-1v
1203	CAPSD_AAV2S_Sinai_substitutions_2021	40	3	ndcg	0.289737	Compound-multi	Zero Shot	ESM-1v
1204	GFP_AEQVI_Sarkisyan_2016	160	4	ndcg	0.59657	Compound-multi	Zero Shot	ESM-1v
1205	YAP1_HUMAN_Araya_2012	80	1	ndcg	0.408161	Local-single	Zero Shot	ESM-1v
1206	CAPSD_AAV2S_Sinai_substitutions_2021	160	3	ndcg	0.338078	Compound-multi	Zero Shot	ESM-1v
1207	SPG1_STRSG_Olson_2014	80	3	ndcg	0.467042	Local-single	Zero Shot	ESM-1v
1208	A4_HUMAN_Seuma_2021	320	5	ndcg	0.202955	Compound-multi	Zero Shot	ESM-1v
1209	SPG1_STRSG_Olson_2014	80	3	ndcg	0.756198	Compound-multi	Zero Shot	ESM-1v
1210	DLG4_HUMAN_Faure_2021	20	1	ndcg	0.821402	Local-single	Zero Shot	ESM-1v
1211	YAP1_HUMAN_Araya_2012	160	4	ndcg	0.200596	Local-single	Zero Shot	ESM-1v
1212	YAP1_HUMAN_Araya_2012	20	2	ndcg	0.505867	Compound-multi	Zero Shot	ESM-1v
1213	GRB2_HUMAN_Faure_2021	80	5	ndcg	0.860493	Local-single	Zero Shot	ESM-1v
1214	CAPSD_AAV2S_Sinai_substitutions_2021	80	3	ndcg	0.732687	Local-single	Zero Shot	ESM-1v
1215	DLG4_HUMAN_Faure_2021	40	1	ndcg	0.696995	Local-single	Zero Shot	ESM-1v
1216	GRB2_HUMAN_Faure_2021	40	1	ndcg	0.354094	Compound-multi	Zero Shot	ESM-1v
1217	DLG4_HUMAN_Faure_2021	40	1	ndcg	0.63365	Compound-multi	Zero Shot	ESM-1v
1218	CAPSD_AAV2S_Sinai_substitutions_2021	80	4	ndcg	0.462809	Local-single	Zero Shot	ESM-1v
1219	SPG1_STRSG_Olson_2014	320	2	ndcg	0.658552	Compound-multi	Zero Shot	ESM-1v
1220	GFP_AEQVI_Sarkisyan_2016	80	3	ndcg	0.731672	Local-single	Zero Shot	ESM-1v
1221	YAP1_HUMAN_Araya_2012	160	4	ndcg	0.166554	Compound-multi	Zero Shot	ESM-1v
1222	CAPSD_AAV2S_Sinai_substitutions_2021	80	3	ndcg	0.558048	Compound-multi	Zero Shot	ESM-1v
1223	A4_HUMAN_Seuma_2021	40	5	ndcg	0.397236	Compound-multi	Zero Shot	ESM-1v
1224	CAPSD_AAV2S_Sinai_substitutions_2021	40	5	ndcg	0.463431	Local-single	Zero Shot	ESM-1v
1225	CAPSD_AAV2S_Sinai_substitutions_2021	160	2	ndcg	0.109333	Compound-multi	Zero Shot	ESM-1v
1226	YAP1_HUMAN_Araya_2012	20	1	ndcg	0.0310721	Local-single	Zero Shot	ESM-1v
1227	SPG1_STRSG_Olson_2014	320	5	ndcg	0.828566	Local-single	Zero Shot	ESM-1v
1228	GRB2_HUMAN_Faure_2021	160	5	ndcg	0.713595	Local-single	Zero Shot	ESM-1v
1229	DLG4_HUMAN_Faure_2021	40	3	ndcg	0.613173	Local-single	Zero Shot	ESM-1v
1230	SPG1_STRSG_Olson_2014	20	5	ndcg	0.355604	Local-single	Zero Shot	ESM-1v
1231	YAP1_HUMAN_Araya_2012	20	3	ndcg	0.527306	Compound-multi	Zero Shot	ESM-1v
1232	CAPSD_AAV2S_Sinai_substitutions_2021	160	5	ndcg	0.0981677	Local-single	Zero Shot	ESM-1v
1233	GRB2_HUMAN_Faure_2021	40	2	ndcg	0.867747	Compound-multi	Zero Shot	ESM-1v
1234	CAPSD_AAV2S_Sinai_substitutions_2021	160	1	ndcg	0.0140705	Local-single	Zero Shot	ESM-1v
1235	GFP_AEQVI_Sarkisyan_2016	20	5	ndcg	0.247904	Compound-multi	Zero Shot	ESM-1v
1236	DLG4_HUMAN_Faure_2021	40	3	ndcg	0.197418	Compound-multi	Zero Shot	ESM-1v
1237	SPG1_STRSG_Olson_2014	160	1	ndcg	0.597841	Local-single	Zero Shot	ESM-1v
1238	SPG1_STRSG_Olson_2014	40	4	ndcg	0.0220941	Compound-multi	Zero Shot	ESM-1v
1239	CAPSD_AAV2S_Sinai_substitutions_2021	320	5	ndcg	0.0646738	Compound-multi	Zero Shot	ESM-1v
1240	YAP1_HUMAN_Araya_2012	20	3	ndcg	0.213841	Local-single	Zero Shot	ESM-1v
1241	CAPSD_AAV2S_Sinai_substitutions_2021	320	1	ndcg	0.0399529	Compound-multi	Zero Shot	ESM-1v
1242	DLG4_HUMAN_Faure_2021	20	3	ndcg	0.390994	Local-single	Zero Shot	ESM-1v
1243	CAPSD_AAV2S_Sinai_substitutions_2021	160	5	ndcg	0.217581	Compound-multi	Zero Shot	ESM-1v
1244	GRB2_HUMAN_Faure_2021	20	2	ndcg	0.768375	Local-single	Zero Shot	ESM-1v
1245	CAPSD_AAV2S_Sinai_substitutions_2021	320	1	ndcg	0.110227	Local-single	Zero Shot	ESM-1v
1246	SPG1_STRSG_Olson_2014	320	1	ndcg	0.512941	Compound-multi	Zero Shot	ESM-1v
1247	YAP1_HUMAN_Araya_2012	40	2	ndcg	0.392382	Local-single	Zero Shot	ESM-1v
1248	DLG4_HUMAN_Faure_2021	20	3	ndcg	0.51111	Compound-multi	Zero Shot	ESM-1v
1249	GCN4_YEAST_Staller_induction_2018	20	1	ndcg	0.472669	Local-single	Zero Shot	ESM-1v
1250	YAP1_HUMAN_Araya_2012	40	3	ndcg	0.135643	Compound-multi	Zero Shot	ESM-1v
1251	GFP_AEQVI_Sarkisyan_2016	20	2	ndcg	0.251604	Compound-multi	Zero Shot	ESM-1v
1252	A4_HUMAN_Seuma_2021	80	5	ndcg	0.449946	Local-single	Zero Shot	ESM-1v
1253	A4_HUMAN_Seuma_2021	320	4	ndcg	0.243349	Compound-multi	Zero Shot	ESM-1v
1254	DLG4_HUMAN_Faure_2021	320	2	ndcg	0.665938	Local-single	Zero Shot	ESM-1v
1255	CAPSD_AAV2S_Sinai_substitutions_2021	160	1	ndcg	0.0903833	Compound-multi	Zero Shot	ESM-1v
1256	SPG1_STRSG_Olson_2014	160	1	ndcg	0.787883	Compound-multi	Zero Shot	ESM-1v
1257	GFP_AEQVI_Sarkisyan_2016	320	4	ndcg	0.18242	Compound-multi	Zero Shot	ESM-1v
1258	SPG1_STRSG_Olson_2014	80	1	ndcg	0.442876	Compound-multi	Zero Shot	ESM-1v
1259	GFP_AEQVI_Sarkisyan_2016	20	1	ndcg	0.686012	Compound-multi	Zero Shot	ESM-1v
1260	YAP1_HUMAN_Araya_2012	80	2	ndcg	0.229481	Local-single	Zero Shot	ESM-1v
1261	DLG4_HUMAN_Faure_2021	160	3	ndcg	0.65687	Local-single	Zero Shot	ESM-1v
1262	CAPSD_AAV2S_Sinai_substitutions_2021	40	1	ndcg	0.208475	Local-single	Zero Shot	ESM-1v
1263	YAP1_HUMAN_Araya_2012	20	1	ndcg	0.556219	Compound-multi	Zero Shot	ESM-1v
1264	SPG1_STRSG_Olson_2014	80	4	ndcg	0.627349	Compound-multi	Zero Shot	ESM-1v
1265	YAP1_HUMAN_Araya_2012	80	2	ndcg	0.04399	Compound-multi	Zero Shot	ESM-1v
1266	GFP_AEQVI_Sarkisyan_2016	20	1	ndcg	0.290248	Local-single	Zero Shot	ESM-1v
1267	DLG4_HUMAN_Faure_2021	160	3	ndcg	0.479997	Compound-multi	Zero Shot	ESM-1v
1268	CAPSD_AAV2S_Sinai_substitutions_2021	80	1	ndcg	0.126607	Compound-multi	Zero Shot	ESM-1v
1269	SPG1_STRSG_Olson_2014	40	4	ndcg	0.0712082	Local-single	Zero Shot	ESM-1v
1270	SPG1_STRSG_Olson_2014	80	1	ndcg	0.555932	Local-single	Zero Shot	ESM-1v
1271	YAP1_HUMAN_Araya_2012	160	2	ndcg	0.0143457	Compound-multi	Zero Shot	ESM-1v
1272	CAPSD_AAV2S_Sinai_substitutions_2021	320	5	ndcg	0.0706251	Local-single	Zero Shot	ESM-1v
1273	DLG4_HUMAN_Faure_2021	80	3	ndcg	0.801731	Local-single	Zero Shot	ESM-1v
1274	A4_HUMAN_Seuma_2021	80	5	ndcg	0.386527	Compound-multi	Zero Shot	ESM-1v
1275	CAPSD_AAV2S_Sinai_substitutions_2021	80	1	ndcg	0.0365002	Local-single	Zero Shot	ESM-1v
1276	SPG1_STRSG_Olson_2014	80	4	ndcg	0.761853	Local-single	Zero Shot	ESM-1v
1277	GFP_AEQVI_Sarkisyan_2016	320	4	ndcg	0.50221	Local-single	Zero Shot	ESM-1v
1278	GFP_AEQVI_Sarkisyan_2016	40	4	ndcg	0.242114	Compound-multi	Zero Shot	ESM-1v
1279	GRB2_HUMAN_Faure_2021	40	2	ndcg	0.760423	Local-single	Zero Shot	ESM-1v
1280	YAP1_HUMAN_Araya_2012	160	2	ndcg	0.110835	Local-single	Zero Shot	ESM-1v
1281	DLG4_HUMAN_Faure_2021	80	3	ndcg	0.524226	Compound-multi	Zero Shot	ESM-1v
1282	PABP_YEAST_Melamed_2013	20	1	ndcg	0.353949	Compound-multi	Zero Shot	ESM-1v
1283	GFP_AEQVI_Sarkisyan_2016	20	2	ndcg	0.0943013	Local-single	Zero Shot	ESM-1v
1284	CAPSD_AAV2S_Sinai_substitutions_2021	80	5	ndcg	0.152207	Local-single	Zero Shot	ESM-1v
1285	A4_HUMAN_Seuma_2021	160	5	ndcg	0.45671	Local-single	Zero Shot	ESM-1v
1286	CAPSD_AAV2S_Sinai_substitutions_2021	80	5	ndcg	0.310011	Compound-multi	Zero Shot	ESM-1v
1287	DLG4_HUMAN_Faure_2021	160	2	ndcg	0.834739	Local-single	Zero Shot	ESM-1v
1288	SPG1_STRSG_Olson_2014	20	2	ndcg	0.105021	Compound-multi	Zero Shot	ESM-1v
1289	GRB2_HUMAN_Faure_2021	20	2	ndcg	0.932793	Compound-multi	Zero Shot	ESM-1v
1290	GRB2_HUMAN_Faure_2021	80	5	ndcg	0.419318	Compound-multi	Zero Shot	ESM-1v
1291	SPG1_STRSG_Olson_2014	20	4	ndcg	0.570747	Local-single	Zero Shot	ESM-1v
1292	GFP_AEQVI_Sarkisyan_2016	20	5	ndcg	0.278552	Local-single	Zero Shot	ESM-1v
1293	YAP1_HUMAN_Araya_2012	40	1	ndcg	0.24061	Compound-multi	Zero Shot	ESM-1v
1294	YAP1_HUMAN_Araya_2012	80	3	ndcg	0.049988	Compound-multi	Zero Shot	ESM-1v
1295	HIS7_YEAST_Pokusaeva_2019	20	1	ndcg	0.511327	Compound-multi	Zero Shot	ESM-1v
1296	GFP_AEQVI_Sarkisyan_2016	40	1	ndcg	0.0227077	Compound-multi	Zero Shot	ESM-1v
1297	SPG1_STRSG_Olson_2014	20	4	ndcg	0.375307	Compound-multi	Zero Shot	ESM-1v
1298	CAPSD_AAV2S_Sinai_substitutions_2021	40	2	ndcg	0.0447201	Compound-multi	Zero Shot	ESM-1v
1299	GFP_AEQVI_Sarkisyan_2016	160	4	ndcg	1.03489	Local-single	Zero Shot	ESM-1v
1300	DLG4_HUMAN_Faure_2021	320	2	ndcg	0.578344	Compound-multi	Zero Shot	ESM-1v
1301	YAP1_HUMAN_Araya_2012	40	3	ndcg	0.233418	Local-single	Zero Shot	ESM-1v
1302	CAPSD_AAV2S_Sinai_substitutions_2021	20	2	ndcg	0.0743076	Compound-multi	Zero Shot	ESM-1v
1303	SPG1_STRSG_Olson_2014	320	1	ndcg	0.50834	Local-single	Zero Shot	ESM-1v
1304	CAPSD_AAV2S_Sinai_substitutions_2021	20	2	ndcg	0.247615	Local-single	Zero Shot	ESM-1v
1305	F7YBW8_MESOW_Aakre_2015	20	2	ndcg	0.422094	Compound-multi	Zero Shot	ESM-2
1306	GRB2_HUMAN_Faure_2021	320	4	ndcg	0.68087	Local-single	Zero Shot	ESM-2
1307	PABP_YEAST_Melamed_2013	40	3	ndcg	0.552669	Compound-multi	Zero Shot	ESM-2
1308	YAP1_HUMAN_Araya_2012	20	4	ndcg	0.313923	Compound-multi	Zero Shot	ESM-2
1309	PABP_YEAST_Melamed_2013	320	1	ndcg	0.368093	Compound-multi	Zero Shot	ESM-2
1310	A4_HUMAN_Seuma_2021	40	2	ndcg	0.0598614	Compound-multi	Zero Shot	ESM-2
1311	GFP_AEQVI_Sarkisyan_2016	40	1	ndcg	0.0648699	Compound-multi	Zero Shot	ESM-2
1312	SPG1_STRSG_Olson_2014	160	4	ndcg	0.68455	Local-single	Zero Shot	ESM-2
1313	YAP1_HUMAN_Araya_2012	160	2	ndcg	0.113369	Compound-multi	Zero Shot	ESM-2
1314	GRB2_HUMAN_Faure_2021	20	4	ndcg	0.755491	Local-single	Zero Shot	ESM-2
1315	YAP1_HUMAN_Araya_2012	20	5	ndcg	0.293875	Compound-multi	Zero Shot	ESM-2
1316	A4_HUMAN_Seuma_2021	80	5	ndcg	0.0363912	Compound-multi	Zero Shot	ESM-2
1317	GFP_AEQVI_Sarkisyan_2016	160	5	ndcg	0.00473351	Local-single	Zero Shot	ESM-2
1318	YAP1_HUMAN_Araya_2012	160	3	ndcg	0.117057	Compound-multi	Zero Shot	ESM-2
1319	PABP_YEAST_Melamed_2013	80	2	ndcg	0.510847	Compound-multi	Zero Shot	ESM-2
1320	GRB2_HUMAN_Faure_2021	40	4	ndcg	0.489958	Compound-multi	Zero Shot	ESM-2
1321	YAP1_HUMAN_Araya_2012	160	4	ndcg	0.233873	Compound-multi	Zero Shot	ESM-2
1322	CAPSD_AAV2S_Sinai_substitutions_2021	80	4	ndcg	0.428619	Local-single	Zero Shot	ESM-2
1323	PABP_YEAST_Melamed_2013	160	1	ndcg	0.455567	Compound-multi	Zero Shot	ESM-2
1324	PABP_YEAST_Melamed_2013	20	3	ndcg	0.295979	Local-single	Zero Shot	ESM-2
1325	F7YBW8_MESOW_Aakre_2015	20	1	ndcg	0.749985	Compound-multi	Zero Shot	ESM-2
1326	A4_HUMAN_Seuma_2021	40	5	ndcg	0.0157234	Compound-multi	Zero Shot	ESM-2
1327	SPG1_STRSG_Olson_2014	320	3	ndcg	0.43983	Local-single	Zero Shot	ESM-2
1328	YAP1_HUMAN_Araya_2012	20	2	ndcg	0.230058	Compound-multi	Zero Shot	ESM-2
1329	HIS7_YEAST_Pokusaeva_2019	40	3	ndcg	0.222712	Compound-multi	Zero Shot	ESM-2
1330	SPG1_STRSG_Olson_2014	40	4	ndcg	0.588014	Local-single	Zero Shot	ESM-2
1331	GFP_AEQVI_Sarkisyan_2016	320	4	ndcg	0.0590833	Local-single	Zero Shot	ESM-2
1332	GRB2_HUMAN_Faure_2021	320	5	ndcg	0.669572	Compound-multi	Zero Shot	ESM-2
1333	A4_HUMAN_Seuma_2021	40	2	ndcg	0.0172615	Local-single	Zero Shot	ESM-2
1334	A4_HUMAN_Seuma_2021	320	3	ndcg	0.409149	Compound-multi	Zero Shot	ESM-2
1335	CAPSD_AAV2S_Sinai_substitutions_2021	80	5	ndcg	0.523824	Compound-multi	Zero Shot	ESM-2
1336	CAPSD_AAV2S_Sinai_substitutions_2021	40	4	ndcg	0.168137	Local-single	Zero Shot	ESM-2
1337	YAP1_HUMAN_Araya_2012	160	4	ndcg	0.256873	Local-single	Zero Shot	ESM-2
1338	SPG1_STRSG_Olson_2014	80	3	ndcg	0.73738	Compound-multi	Zero Shot	ESM-2
1339	CAPSD_AAV2S_Sinai_substitutions_2021	80	4	ndcg	0.489159	Compound-multi	Zero Shot	ESM-2
1340	YAP1_HUMAN_Araya_2012	40	2	ndcg	0.0928571	Compound-multi	Zero Shot	ESM-2
1341	SPG1_STRSG_Olson_2014	320	5	ndcg	0.618021	Compound-multi	Zero Shot	ESM-2
1342	GFP_AEQVI_Sarkisyan_2016	160	3	ndcg	0.708035	Compound-multi	Zero Shot	ESM-2
1343	SPG1_STRSG_Olson_2014	80	4	ndcg	0.625831	Compound-multi	Zero Shot	ESM-2
1344	YAP1_HUMAN_Araya_2012	80	2	ndcg	0.665581	Local-single	Zero Shot	ESM-2
1345	A4_HUMAN_Seuma_2021	20	2	ndcg	0.679077	Compound-multi	Zero Shot	ESM-2
1346	YAP1_HUMAN_Araya_2012	40	5	ndcg	0.0352027	Compound-multi	Zero Shot	ESM-2
1347	PABP_YEAST_Melamed_2013	160	1	ndcg	0.399907	Local-single	Zero Shot	ESM-2
1348	GFP_AEQVI_Sarkisyan_2016	80	1	ndcg	0.603057	Local-single	Zero Shot	ESM-2
1349	GRB2_HUMAN_Faure_2021	160	4	ndcg	0.613734	Compound-multi	Zero Shot	ESM-2
1350	GRB2_HUMAN_Faure_2021	20	4	ndcg	0.971533	Compound-multi	Zero Shot	ESM-2
1351	CAPSD_AAV2S_Sinai_substitutions_2021	20	4	ndcg	0.911926	Local-single	Zero Shot	ESM-2
1352	SPG1_STRSG_Olson_2014	20	4	ndcg	0.387368	Compound-multi	Zero Shot	ESM-2
1353	HIS7_YEAST_Pokusaeva_2019	80	3	ndcg	0.656777	Compound-multi	Zero Shot	ESM-2
1354	A4_HUMAN_Seuma_2021	40	4	ndcg	0.255165	Local-single	Zero Shot	ESM-2
1355	SPG1_STRSG_Olson_2014	40	3	ndcg	0.456232	Compound-multi	Zero Shot	ESM-2
1356	A4_HUMAN_Seuma_2021	80	5	ndcg	0.061591	Local-single	Zero Shot	ESM-2
1357	GFP_AEQVI_Sarkisyan_2016	20	1	ndcg	0.702911	Compound-multi	Zero Shot	ESM-2
1358	A4_HUMAN_Seuma_2021	20	4	ndcg	0.395403	Compound-multi	Zero Shot	ESM-2
1359	YAP1_HUMAN_Araya_2012	40	5	ndcg	0.0379026	Local-single	Zero Shot	ESM-2
1360	A4_HUMAN_Seuma_2021	320	1	ndcg	0.0112275	Local-single	Zero Shot	ESM-2
1361	YAP1_HUMAN_Araya_2012	80	2	ndcg	0.307615	Compound-multi	Zero Shot	ESM-2
1362	PABP_YEAST_Melamed_2013	40	2	ndcg	0.563574	Local-single	Zero Shot	ESM-2
1363	SPG1_STRSG_Olson_2014	160	5	ndcg	0.518136	Local-single	Zero Shot	ESM-2
1364	GFP_AEQVI_Sarkisyan_2016	40	5	ndcg	0.270543	Compound-multi	Zero Shot	ESM-2
1365	HIS7_YEAST_Pokusaeva_2019	40	2	ndcg	0.236187	Local-single	Zero Shot	ESM-2
1366	PABP_YEAST_Melamed_2013	80	3	ndcg	0.461247	Compound-multi	Zero Shot	ESM-2
1367	GFP_AEQVI_Sarkisyan_2016	80	3	ndcg	0.784293	Compound-multi	Zero Shot	ESM-2
1368	PABP_YEAST_Melamed_2013	40	3	ndcg	0.0465505	Local-single	Zero Shot	ESM-2
1369	CAPSD_AAV2S_Sinai_substitutions_2021	40	5	ndcg	0.0376117	Compound-multi	Zero Shot	ESM-2
1370	HIS7_YEAST_Pokusaeva_2019	40	3	ndcg	0.0558909	Local-single	Zero Shot	ESM-2
1371	SPG1_STRSG_Olson_2014	40	3	ndcg	0.340407	Local-single	Zero Shot	ESM-2
1372	CAPSD_AAV2S_Sinai_substitutions_2021	320	5	ndcg	0.0252551	Local-single	Zero Shot	ESM-2
1373	A4_HUMAN_Seuma_2021	20	2	ndcg	0.331503	Local-single	Zero Shot	ESM-2
1374	YAP1_HUMAN_Araya_2012	80	3	ndcg	0.0819047	Compound-multi	Zero Shot	ESM-2
1375	A4_HUMAN_Seuma_2021	320	3	ndcg	0.0310215	Local-single	Zero Shot	ESM-2
1376	GFP_AEQVI_Sarkisyan_2016	320	5	ndcg	0.257269	Compound-multi	Zero Shot	ESM-2
1377	YAP1_HUMAN_Araya_2012	20	5	ndcg	0.246983	Local-single	Zero Shot	ESM-2
1378	GFP_AEQVI_Sarkisyan_2016	320	2	ndcg	0.23926	Compound-multi	Zero Shot	ESM-2
1379	GFP_AEQVI_Sarkisyan_2016	20	1	ndcg	0.0368283	Local-single	Zero Shot	ESM-2
1380	HIS7_YEAST_Pokusaeva_2019	40	1	ndcg	0.100835	Local-single	Zero Shot	ESM-2
1381	A4_HUMAN_Seuma_2021	40	3	ndcg	0.470812	Local-single	Zero Shot	ESM-2
1382	HIS7_YEAST_Pokusaeva_2019	80	1	ndcg	0.333958	Local-single	Zero Shot	ESM-2
1383	YAP1_HUMAN_Araya_2012	80	3	ndcg	0.383029	Local-single	Zero Shot	ESM-2
1384	CAPSD_AAV2S_Sinai_substitutions_2021	40	4	ndcg	0.131701	Compound-multi	Zero Shot	ESM-2
1385	GFP_AEQVI_Sarkisyan_2016	320	3	ndcg	0.656801	Compound-multi	Zero Shot	ESM-2
1386	GFP_AEQVI_Sarkisyan_2016	320	4	ndcg	0.176303	Compound-multi	Zero Shot	ESM-2
1387	A4_HUMAN_Seuma_2021	40	3	ndcg	0.235235	Compound-multi	Zero Shot	ESM-2
1388	YAP1_HUMAN_Araya_2012	160	2	ndcg	0.280725	Local-single	Zero Shot	ESM-2
1389	CAPSD_AAV2S_Sinai_substitutions_2021	320	5	ndcg	0.102607	Compound-multi	Zero Shot	ESM-2
1390	A4_HUMAN_Seuma_2021	20	3	ndcg	0.349222	Local-single	Zero Shot	ESM-2
1391	GFP_AEQVI_Sarkisyan_2016	40	5	ndcg	0.228136	Local-single	Zero Shot	ESM-2
1392	A4_HUMAN_Seuma_2021	20	4	ndcg	0.353237	Local-single	Zero Shot	ESM-2
1393	GRB2_HUMAN_Faure_2021	80	4	ndcg	0.698323	Compound-multi	Zero Shot	ESM-2
1394	GRB2_HUMAN_Faure_2021	80	4	ndcg	0.766883	Local-single	Zero Shot	ESM-2
1395	GCN4_YEAST_Staller_induction_2018	20	5	ndcg	0.559236	Local-single	Zero Shot	ESM-2
1396	YAP1_HUMAN_Araya_2012	40	4	ndcg	0.322629	Compound-multi	Zero Shot	ESM-2
1397	A4_HUMAN_Seuma_2021	40	4	ndcg	0.138717	Compound-multi	Zero Shot	ESM-2
1398	YAP1_HUMAN_Araya_2012	20	2	ndcg	0.821618	Local-single	Zero Shot	ESM-2
1399	A4_HUMAN_Seuma_2021	20	3	ndcg	0.415437	Compound-multi	Zero Shot	ESM-2
1400	PABP_YEAST_Melamed_2013	320	2	ndcg	0.138968	Compound-multi	Zero Shot	ESM-2
1401	CAPSD_AAV2S_Sinai_substitutions_2021	160	5	ndcg	0.131905	Compound-multi	Zero Shot	ESM-2
1402	YAP1_HUMAN_Araya_2012	40	2	ndcg	0.0886823	Local-single	Zero Shot	ESM-2
1403	A4_HUMAN_Seuma_2021	160	2	ndcg	0.00903892	Local-single	Zero Shot	ESM-2
1404	CAPSD_AAV2S_Sinai_substitutions_2021	320	4	ndcg	0.0103093	Compound-multi	Zero Shot	ESM-2
1405	GFP_AEQVI_Sarkisyan_2016	20	5	ndcg	0.204222	Compound-multi	Zero Shot	ESM-2
1406	CAPSD_AAV2S_Sinai_substitutions_2021	20	5	ndcg	0.0383789	Local-single	Zero Shot	ESM-2
1407	HIS7_YEAST_Pokusaeva_2019	20	2	ndcg	0.0284823	Local-single	Zero Shot	ESM-2
1408	HIS7_YEAST_Pokusaeva_2019	20	3	ndcg	0.868872	Compound-multi	Zero Shot	ESM-2
1409	YAP1_HUMAN_Araya_2012	20	3	ndcg	0.0318199	Local-single	Zero Shot	ESM-2
1410	SPG1_STRSG_Olson_2014	160	3	ndcg	0.461318	Local-single	Zero Shot	ESM-2
1411	YAP1_HUMAN_Araya_2012	40	4	ndcg	0.510004	Local-single	Zero Shot	ESM-2
1412	A4_HUMAN_Seuma_2021	320	2	ndcg	0.331624	Compound-multi	Zero Shot	ESM-2
1413	GFP_AEQVI_Sarkisyan_2016	160	3	ndcg	0.0275905	Local-single	Zero Shot	ESM-2
1414	PABP_YEAST_Melamed_2013	80	1	ndcg	0.764347	Local-single	Zero Shot	ESM-2
1415	HIS7_YEAST_Pokusaeva_2019	80	1	ndcg	0.242335	Compound-multi	Zero Shot	ESM-2
1416	CAPSD_AAV2S_Sinai_substitutions_2021	80	5	ndcg	0.305753	Local-single	Zero Shot	ESM-2
1417	A4_HUMAN_Seuma_2021	320	2	ndcg	0.0625301	Local-single	Zero Shot	ESM-2
1418	GFP_AEQVI_Sarkisyan_2016	40	1	ndcg	0.482644	Local-single	Zero Shot	ESM-2
1419	CAPSD_AAV2S_Sinai_substitutions_2021	20	5	ndcg	0.141509	Compound-multi	Zero Shot	ESM-2
1420	SPG1_STRSG_Olson_2014	20	4	ndcg	0.560419	Local-single	Zero Shot	ESM-2
1421	GRB2_HUMAN_Faure_2021	160	5	ndcg	0.618386	Compound-multi	Zero Shot	ESM-2
1422	GFP_AEQVI_Sarkisyan_2016	160	4	ndcg	0.345905	Local-single	Zero Shot	ESM-2
1423	HIS7_YEAST_Pokusaeva_2019	80	2	ndcg	0.357427	Local-single	Zero Shot	ESM-2
1424	SPG1_STRSG_Olson_2014	320	3	ndcg	0.574675	Compound-multi	Zero Shot	ESM-2
1425	GRB2_HUMAN_Faure_2021	160	4	ndcg	0.794329	Local-single	Zero Shot	ESM-2
1426	PABP_YEAST_Melamed_2013	20	2	ndcg	0.487233	Local-single	Zero Shot	ESM-2
1427	YAP1_HUMAN_Araya_2012	40	3	ndcg	0.136953	Compound-multi	Zero Shot	ESM-2
1428	A4_HUMAN_Seuma_2021	80	3	ndcg	0.428404	Local-single	Zero Shot	ESM-2
1429	SPG1_STRSG_Olson_2014	160	4	ndcg	0.704053	Compound-multi	Zero Shot	ESM-2
1430	YAP1_HUMAN_Araya_2012	20	4	ndcg	0.681092	Local-single	Zero Shot	ESM-2
1431	GFP_AEQVI_Sarkisyan_2016	80	5	ndcg	0.130876	Compound-multi	Zero Shot	ESM-2
1432	PABP_YEAST_Melamed_2013	160	2	ndcg	0.434702	Local-single	Zero Shot	ESM-2
1433	CAPSD_AAV2S_Sinai_substitutions_2021	320	4	ndcg	0.387067	Local-single	Zero Shot	ESM-2
1434	A4_HUMAN_Seuma_2021	80	3	ndcg	0.253301	Compound-multi	Zero Shot	ESM-2
1435	A4_HUMAN_Seuma_2021	160	3	ndcg	0.124257	Compound-multi	Zero Shot	ESM-2
1436	F7YBW8_MESOW_Aakre_2015	20	1	ndcg	0.601392	Local-single	Zero Shot	ESM-2
1437	CAPSD_AAV2S_Sinai_substitutions_2021	160	4	ndcg	0.217011	Compound-multi	Zero Shot	ESM-2
1438	YAP1_HUMAN_Araya_2012	20	3	ndcg	0.0359304	Compound-multi	Zero Shot	ESM-2
1439	HIS7_YEAST_Pokusaeva_2019	20	3	ndcg	0.456609	Local-single	Zero Shot	ESM-2
1440	PABP_YEAST_Melamed_2013	80	2	ndcg	0.246947	Local-single	Zero Shot	ESM-2
1441	GFP_AEQVI_Sarkisyan_2016	20	5	ndcg	0.358488	Local-single	Zero Shot	ESM-2
1442	PABP_YEAST_Melamed_2013	20	3	ndcg	0.645042	Compound-multi	Zero Shot	ESM-2
1443	A4_HUMAN_Seuma_2021	160	3	ndcg	0.124162	Local-single	Zero Shot	ESM-2
1444	YAP1_HUMAN_Araya_2012	80	4	ndcg	0.0957929	Local-single	Zero Shot	ESM-2
1445	SPG1_STRSG_Olson_2014	80	3	ndcg	0.138877	Local-single	Zero Shot	ESM-2
1446	GRB2_HUMAN_Faure_2021	160	5	ndcg	0.797681	Local-single	Zero Shot	ESM-2
1447	PABP_YEAST_Melamed_2013	40	2	ndcg	0.591618	Compound-multi	Zero Shot	ESM-2
1448	SPG1_STRSG_Olson_2014	160	5	ndcg	0.606773	Compound-multi	Zero Shot	ESM-2
1449	GRB2_HUMAN_Faure_2021	20	5	ndcg	0.942023	Local-single	Zero Shot	ESM-2
1450	GFP_AEQVI_Sarkisyan_2016	80	1	ndcg	0.405694	Compound-multi	Zero Shot	ESM-2
1451	A4_HUMAN_Seuma_2021	40	5	ndcg	0.130501	Local-single	Zero Shot	ESM-2
1452	PABP_YEAST_Melamed_2013	320	1	ndcg	0.209483	Local-single	Zero Shot	ESM-2
1453	PABP_YEAST_Melamed_2013	160	2	ndcg	0.190363	Compound-multi	Zero Shot	ESM-2
1454	A4_HUMAN_Seuma_2021	80	2	ndcg	0.0197697	Compound-multi	Zero Shot	ESM-2
1455	GFP_AEQVI_Sarkisyan_2016	160	5	ndcg	0.364633	Compound-multi	Zero Shot	ESM-2
1456	A4_HUMAN_Seuma_2021	80	2	ndcg	0.0668257	Local-single	Zero Shot	ESM-2
1457	GFP_AEQVI_Sarkisyan_2016	20	3	ndcg	0.256119	Local-single	Zero Shot	ESM-2
1458	SPG1_STRSG_Olson_2014	80	4	ndcg	0.718115	Local-single	Zero Shot	ESM-2
1459	CAPSD_AAV2S_Sinai_substitutions_2021	160	5	ndcg	0.0551417	Local-single	Zero Shot	ESM-2
1460	HIS7_YEAST_Pokusaeva_2019	80	2	ndcg	0.497925	Compound-multi	Zero Shot	ESM-2
1461	YAP1_HUMAN_Araya_2012	160	3	ndcg	0.406183	Local-single	Zero Shot	ESM-2
1462	GFP_AEQVI_Sarkisyan_2016	160	4	ndcg	0.34452	Compound-multi	Zero Shot	ESM-2
1463	YAP1_HUMAN_Araya_2012	40	3	ndcg	0.259306	Local-single	Zero Shot	ESM-2
1464	GFP_AEQVI_Sarkisyan_2016	80	5	ndcg	0.795448	Local-single	Zero Shot	ESM-2
1465	SPG1_STRSG_Olson_2014	160	3	ndcg	0.316029	Compound-multi	Zero Shot	ESM-2
1466	GFP_AEQVI_Sarkisyan_2016	320	2	ndcg	0.0539474	Local-single	Zero Shot	ESM-2
1467	SPG1_STRSG_Olson_2014	40	4	ndcg	0.253609	Compound-multi	Zero Shot	ESM-2
1468	A4_HUMAN_Seuma_2021	160	2	ndcg	0.0515531	Compound-multi	Zero Shot	ESM-2
1469	HIS7_YEAST_Pokusaeva_2019	20	2	ndcg	1.72965	Compound-multi	Zero Shot	ESM-2
1470	PABP_YEAST_Melamed_2013	20	2	ndcg	0.217228	Compound-multi	Zero Shot	ESM-2
1471	GRB2_HUMAN_Faure_2021	40	4	ndcg	0.84147	Local-single	Zero Shot	ESM-2
1472	HIS7_YEAST_Pokusaeva_2019	40	2	ndcg	0.248622	Compound-multi	Zero Shot	ESM-2
1473	GCN4_YEAST_Staller_induction_2018	20	1	ndcg	0.559236	Local-single	Zero Shot	ESM-2
1474	CAPSD_AAV2S_Sinai_substitutions_2021	40	5	ndcg	0.243447	Local-single	Zero Shot	ESM-2
1475	PABP_YEAST_Melamed_2013	320	2	ndcg	0.271964	Local-single	Zero Shot	ESM-2
1476	YAP1_HUMAN_Araya_2012	80	4	ndcg	0.00978716	Compound-multi	Zero Shot	ESM-2
1477	GRB2_HUMAN_Faure_2021	320	4	ndcg	0.57668	Compound-multi	Zero Shot	ESM-2
1478	A4_HUMAN_Seuma_2021	160	5	ndcg	0.167021	Compound-multi	Zero Shot	ESM-2
1479	GFP_AEQVI_Sarkisyan_2016	40	3	ndcg	0.671996	Compound-multi	Zero Shot	ESM-2
1480	CAPSD_AAV2S_Sinai_substitutions_2021	160	4	ndcg	0.0777496	Local-single	Zero Shot	ESM-2
1481	GFP_AEQVI_Sarkisyan_2016	20	3	ndcg	0.171321	Compound-multi	Zero Shot	ESM-2
1482	HIS7_YEAST_Pokusaeva_2019	20	4	ndcg	0.577365	Local-single	Zero Shot	ESM-2
1483	YAP1_HUMAN_Araya_2012	160	1	ndcg	0.302948	Local-single	Zero Shot	ESM-2
1484	A4_HUMAN_Seuma_2021	320	5	ndcg	0.0218654	Local-single	Zero Shot	ESM-2
1485	PABP_YEAST_Melamed_2013	40	5	ndcg	0.0392327	Compound-multi	Zero Shot	ESM-2
1486	DLG4_HUMAN_Faure_2021	160	2	ndcg	0.649851	Compound-multi	Zero Shot	ESM-2
1487	SPG1_STRSG_Olson_2014	20	2	ndcg	0.161479	Compound-multi	Zero Shot	ESM-2
1488	DLG4_HUMAN_Faure_2021	320	4	ndcg	0.674793	Local-single	Zero Shot	ESM-2
1489	GRB2_HUMAN_Faure_2021	320	1	ndcg	0.768821	Local-single	Zero Shot	ESM-2
1490	GRB2_HUMAN_Faure_2021	20	3	ndcg	0.749539	Compound-multi	Zero Shot	ESM-2
1491	SPG1_STRSG_Olson_2014	20	5	ndcg	0.192002	Compound-multi	Zero Shot	ESM-2
1492	CAPSD_AAV2S_Sinai_substitutions_2021	40	2	ndcg	0.0677353	Compound-multi	Zero Shot	ESM-2
1493	PABP_YEAST_Melamed_2013	40	5	ndcg	0.539632	Local-single	Zero Shot	ESM-2
1494	GRB2_HUMAN_Faure_2021	80	5	ndcg	0.401103	Compound-multi	Zero Shot	ESM-2
1495	DLG4_HUMAN_Faure_2021	160	2	ndcg	0.807688	Local-single	Zero Shot	ESM-2
1496	DLG4_HUMAN_Faure_2021	320	4	ndcg	0.286841	Compound-multi	Zero Shot	ESM-2
1497	HIS7_YEAST_Pokusaeva_2019	80	5	ndcg	0.717696	Compound-multi	Zero Shot	ESM-2
1498	YAP1_HUMAN_Araya_2012	40	1	ndcg	0.1729	Compound-multi	Zero Shot	ESM-2
1499	CAPSD_AAV2S_Sinai_substitutions_2021	20	2	ndcg	0.206334	Local-single	Zero Shot	ESM-2
1500	GFP_AEQVI_Sarkisyan_2016	40	3	ndcg	0.799445	Local-single	Zero Shot	ESM-2
1501	DLG4_HUMAN_Faure_2021	320	2	ndcg	0.363011	Compound-multi	Zero Shot	ESM-2
1502	PABP_YEAST_Melamed_2013	80	5	ndcg	0.324113	Compound-multi	Zero Shot	ESM-2
1503	SPG1_STRSG_Olson_2014	320	1	ndcg	0.539869	Local-single	Zero Shot	ESM-2
1504	DLG4_HUMAN_Faure_2021	160	4	ndcg	0.60766	Local-single	Zero Shot	ESM-2
1505	GRB2_HUMAN_Faure_2021	320	2	ndcg	0.614014	Local-single	Zero Shot	ESM-2
1506	GRB2_HUMAN_Faure_2021	20	2	ndcg	0.508067	Compound-multi	Zero Shot	ESM-2
1507	CAPSD_AAV2S_Sinai_substitutions_2021	20	2	ndcg	0.444832	Compound-multi	Zero Shot	ESM-2
1508	A4_HUMAN_Seuma_2021	160	4	ndcg	0.288175	Compound-multi	Zero Shot	ESM-2
1509	GFP_AEQVI_Sarkisyan_2016	40	2	ndcg	0.251214	Local-single	Zero Shot	ESM-2
1510	DLG4_HUMAN_Faure_2021	320	2	ndcg	0.650676	Local-single	Zero Shot	ESM-2
1511	HIS7_YEAST_Pokusaeva_2019	80	5	ndcg	0.235773	Local-single	Zero Shot	ESM-2
1512	SPG1_STRSG_Olson_2014	320	5	ndcg	0.809298	Local-single	Zero Shot	ESM-2
1513	F7YBW8_MESOW_Aakre_2015	20	4	ndcg	0.526346	Local-single	Zero Shot	ESM-2
1514	HIS7_YEAST_Pokusaeva_2019	40	5	ndcg	0.483785	Local-single	Zero Shot	ESM-2
1515	CAPSD_AAV2S_Sinai_substitutions_2021	40	2	ndcg	0.641704	Local-single	Zero Shot	ESM-2
1516	DLG4_HUMAN_Faure_2021	20	5	ndcg	0.671893	Compound-multi	Zero Shot	ESM-2
1517	CAPSD_AAV2S_Sinai_substitutions_2021	160	2	ndcg	0.158846	Compound-multi	Zero Shot	ESM-2
1518	GRB2_HUMAN_Faure_2021	40	3	ndcg	0.11968	Compound-multi	Zero Shot	ESM-2
1519	PABP_YEAST_Melamed_2013	80	3	ndcg	0.364322	Local-single	Zero Shot	ESM-2
1520	HIS7_YEAST_Pokusaeva_2019	20	5	ndcg	0.528609	Local-single	Zero Shot	ESM-2
1521	DLG4_HUMAN_Faure_2021	40	5	ndcg	0.58136	Local-single	Zero Shot	ESM-2
1522	DLG4_HUMAN_Faure_2021	40	2	ndcg	0.91808	Compound-multi	Zero Shot	ESM-2
1523	GRB2_HUMAN_Faure_2021	160	1	ndcg	0.824084	Local-single	Zero Shot	ESM-2
1524	YAP1_HUMAN_Araya_2012	40	1	ndcg	0.329957	Local-single	Zero Shot	ESM-2
1525	SPG1_STRSG_Olson_2014	40	2	ndcg	0.646506	Compound-multi	Zero Shot	ESM-2
1526	PABP_YEAST_Melamed_2013	320	4	ndcg	0.348287	Local-single	Zero Shot	ESM-2
1527	GFP_AEQVI_Sarkisyan_2016	20	4	ndcg	0.165861	Compound-multi	Zero Shot	ESM-2
1528	DLG4_HUMAN_Faure_2021	40	2	ndcg	0.445263	Local-single	Zero Shot	ESM-2
1529	CAPSD_AAV2S_Sinai_substitutions_2021	80	2	ndcg	0.193517	Local-single	Zero Shot	ESM-2
1530	DLG4_HUMAN_Faure_2021	40	5	ndcg	0.397605	Compound-multi	Zero Shot	ESM-2
1531	DLG4_HUMAN_Faure_2021	160	4	ndcg	0.111972	Compound-multi	Zero Shot	ESM-2
1532	A4_HUMAN_Seuma_2021	320	4	ndcg	0.102491	Local-single	Zero Shot	ESM-2
1533	HIS7_YEAST_Pokusaeva_2019	40	5	ndcg	0.453758	Compound-multi	Zero Shot	ESM-2
1534	GFP_AEQVI_Sarkisyan_2016	40	4	ndcg	0.856926	Local-single	Zero Shot	ESM-2
1535	GFP_AEQVI_Sarkisyan_2016	80	2	ndcg	1.11871	Compound-multi	Zero Shot	ESM-2
1536	DLG4_HUMAN_Faure_2021	80	2	ndcg	0.332918	Compound-multi	Zero Shot	ESM-2
1537	GRB2_HUMAN_Faure_2021	20	3	ndcg	0.581672	Local-single	Zero Shot	ESM-2
1538	CAPSD_AAV2S_Sinai_substitutions_2021	80	2	ndcg	0.0038162	Compound-multi	Zero Shot	ESM-2
1539	DLG4_HUMAN_Faure_2021	20	5	ndcg	0.440728	Local-single	Zero Shot	ESM-2
1540	GRB2_HUMAN_Faure_2021	320	1	ndcg	0.75514	Compound-multi	Zero Shot	ESM-2
1541	SPG1_STRSG_Olson_2014	20	2	ndcg	0.421173	Local-single	Zero Shot	ESM-2
1542	PABP_YEAST_Melamed_2013	20	5	ndcg	0.116564	Local-single	Zero Shot	ESM-2
1543	SPG1_STRSG_Olson_2014	40	5	ndcg	0.258181	Local-single	Zero Shot	ESM-2
1544	PABP_YEAST_Melamed_2013	40	1	ndcg	0.0629527	Compound-multi	Zero Shot	ESM-2
1545	GFP_AEQVI_Sarkisyan_2016	320	1	ndcg	0.158142	Local-single	Zero Shot	ESM-2
1546	DLG4_HUMAN_Faure_2021	80	2	ndcg	0.371279	Local-single	Zero Shot	ESM-2
1547	PABP_YEAST_Melamed_2013	20	5	ndcg	0.477367	Compound-multi	Zero Shot	ESM-2
1548	HIS7_YEAST_Pokusaeva_2019	20	1	ndcg	0.414565	Compound-multi	Zero Shot	ESM-2
1549	PABP_YEAST_Melamed_2013	80	5	ndcg	0.440055	Local-single	Zero Shot	ESM-2
1550	GFP_AEQVI_Sarkisyan_2016	20	2	ndcg	0.234258	Compound-multi	Zero Shot	ESM-2
1551	DLG4_HUMAN_Faure_2021	80	3	ndcg	0.245015	Compound-multi	Zero Shot	ESM-2
1552	SPG1_STRSG_Olson_2014	20	5	ndcg	0.499021	Local-single	Zero Shot	ESM-2
1553	F7YBW8_MESOW_Aakre_2015	20	5	ndcg	0.138025	Local-single	Zero Shot	ESM-2
1554	DLG4_HUMAN_Faure_2021	20	4	ndcg	0.0763941	Local-single	Zero Shot	ESM-2
1555	CAPSD_AAV2S_Sinai_substitutions_2021	80	1	ndcg	0.111172	Local-single	Zero Shot	ESM-2
1556	SPG1_STRSG_Olson_2014	40	1	ndcg	0.0550257	Compound-multi	Zero Shot	ESM-2
1557	GRB2_HUMAN_Faure_2021	160	2	ndcg	0.770631	Compound-multi	Zero Shot	ESM-2
1558	GRB2_HUMAN_Faure_2021	40	2	ndcg	0.849421	Local-single	Zero Shot	ESM-2
1559	PABP_YEAST_Melamed_2013	20	1	ndcg	0.376849	Compound-multi	Zero Shot	ESM-2
1560	DLG4_HUMAN_Faure_2021	80	3	ndcg	0.787557	Local-single	Zero Shot	ESM-2
1561	SPG1_STRSG_Olson_2014	80	1	ndcg	0.603316	Local-single	Zero Shot	ESM-2
1562	CAPSD_AAV2S_Sinai_substitutions_2021	20	1	ndcg	0.422785	Compound-multi	Zero Shot	ESM-2
1563	GFP_AEQVI_Sarkisyan_2016	20	2	ndcg	0.210151	Local-single	Zero Shot	ESM-2
1564	DLG4_HUMAN_Faure_2021	20	4	ndcg	0.523092	Compound-multi	Zero Shot	ESM-2
1565	PABP_YEAST_Melamed_2013	320	5	ndcg	0.452369	Local-single	Zero Shot	ESM-2
1566	CAPSD_AAV2S_Sinai_substitutions_2021	80	1	ndcg	0.291953	Compound-multi	Zero Shot	ESM-2
1567	DLG4_HUMAN_Faure_2021	160	3	ndcg	0.696187	Compound-multi	Zero Shot	ESM-2
1568	GFP_AEQVI_Sarkisyan_2016	80	3	ndcg	0.649438	Local-single	Zero Shot	ESM-2
1569	GCN4_YEAST_Staller_induction_2018	20	4	ndcg	0.559236	Local-single	Zero Shot	ESM-2
1570	CAPSD_AAV2S_Sinai_substitutions_2021	20	1	ndcg	0.636618	Local-single	Zero Shot	ESM-2
1571	YAP1_HUMAN_Araya_2012	20	1	ndcg	0.63666	Compound-multi	Zero Shot	ESM-2
1572	GRB2_HUMAN_Faure_2021	80	2	ndcg	0.648619	Compound-multi	Zero Shot	ESM-2
1573	DLG4_HUMAN_Faure_2021	320	3	ndcg	0.674109	Local-single	Zero Shot	ESM-2
1574	CAPSD_AAV2S_Sinai_substitutions_2021	40	1	ndcg	0.219969	Local-single	Zero Shot	ESM-2
1575	SPG1_STRSG_Olson_2014	40	1	ndcg	0.117868	Local-single	Zero Shot	ESM-2
1576	GRB2_HUMAN_Faure_2021	80	2	ndcg	0.845478	Local-single	Zero Shot	ESM-2
1577	DLG4_HUMAN_Faure_2021	160	3	ndcg	0.660144	Local-single	Zero Shot	ESM-2
1578	SPG1_STRSG_Olson_2014	80	1	ndcg	0.785452	Compound-multi	Zero Shot	ESM-2
1579	A4_HUMAN_Seuma_2021	160	4	ndcg	0.0672893	Local-single	Zero Shot	ESM-2
1580	CAPSD_AAV2S_Sinai_substitutions_2021	40	1	ndcg	0.391157	Compound-multi	Zero Shot	ESM-2
1581	GFP_AEQVI_Sarkisyan_2016	40	2	ndcg	0.29135	Compound-multi	Zero Shot	ESM-2
1582	GCN4_YEAST_Staller_induction_2018	20	2	ndcg	0.559236	Local-single	Zero Shot	ESM-2
1583	GRB2_HUMAN_Faure_2021	40	5	ndcg	0.89167	Local-single	Zero Shot	ESM-2
1584	DLG4_HUMAN_Faure_2021	40	4	ndcg	0.196935	Compound-multi	Zero Shot	ESM-2
1585	CAPSD_AAV2S_Sinai_substitutions_2021	320	1	ndcg	0.0325551	Local-single	Zero Shot	ESM-2
1586	SPG1_STRSG_Olson_2014	320	1	ndcg	0.603964	Compound-multi	Zero Shot	ESM-2
1587	F7YBW8_MESOW_Aakre_2015	20	5	ndcg	0.568766	Compound-multi	Zero Shot	ESM-2
1588	DLG4_HUMAN_Faure_2021	20	3	ndcg	0.521188	Compound-multi	Zero Shot	ESM-2
1589	GRB2_HUMAN_Faure_2021	320	2	ndcg	0.643055	Compound-multi	Zero Shot	ESM-2
1590	DLG4_HUMAN_Faure_2021	80	4	ndcg	0.721351	Local-single	Zero Shot	ESM-2
1591	GRB2_HUMAN_Faure_2021	20	2	ndcg	0.738241	Local-single	Zero Shot	ESM-2
1592	PABP_YEAST_Melamed_2013	160	5	ndcg	0.30327	Compound-multi	Zero Shot	ESM-2
1593	CAPSD_AAV2S_Sinai_substitutions_2021	320	1	ndcg	0.0198323	Compound-multi	Zero Shot	ESM-2
1594	DLG4_HUMAN_Faure_2021	20	3	ndcg	0.45408	Local-single	Zero Shot	ESM-2
1595	A4_HUMAN_Seuma_2021	320	4	ndcg	0.349771	Compound-multi	Zero Shot	ESM-2
1596	SPG1_STRSG_Olson_2014	20	1	ndcg	0.337011	Compound-multi	Zero Shot	ESM-2
1597	YAP1_HUMAN_Araya_2012	20	1	ndcg	0.0163172	Local-single	Zero Shot	ESM-2
1598	SPG1_STRSG_Olson_2014	160	1	ndcg	0.635032	Local-single	Zero Shot	ESM-2
1599	SPG1_STRSG_Olson_2014	40	5	ndcg	0.16265	Compound-multi	Zero Shot	ESM-2
1600	DLG4_HUMAN_Faure_2021	80	4	ndcg	0.232553	Compound-multi	Zero Shot	ESM-2
1601	CAPSD_AAV2S_Sinai_substitutions_2021	160	1	ndcg	0.00302051	Local-single	Zero Shot	ESM-2
1602	PABP_YEAST_Melamed_2013	160	5	ndcg	0.415735	Local-single	Zero Shot	ESM-2
1603	GFP_AEQVI_Sarkisyan_2016	20	4	ndcg	0.255571	Local-single	Zero Shot	ESM-2
1604	PABP_YEAST_Melamed_2013	20	1	ndcg	0.559414	Local-single	Zero Shot	ESM-2
1605	HIS7_YEAST_Pokusaeva_2019	20	1	ndcg	0.307539	Local-single	Zero Shot	ESM-2
1606	GRB2_HUMAN_Faure_2021	40	2	ndcg	0.904407	Compound-multi	Zero Shot	ESM-2
1607	DLG4_HUMAN_Faure_2021	40	4	ndcg	0.415011	Local-single	Zero Shot	ESM-2
1608	GRB2_HUMAN_Faure_2021	160	2	ndcg	0.733239	Local-single	Zero Shot	ESM-2
1609	DLG4_HUMAN_Faure_2021	40	3	ndcg	0.702301	Local-single	Zero Shot	ESM-2
1610	SPG1_STRSG_Olson_2014	20	1	ndcg	0.00613327	Local-single	Zero Shot	ESM-2
1611	PABP_YEAST_Melamed_2013	320	5	ndcg	0.385042	Compound-multi	Zero Shot	ESM-2
1612	GFP_AEQVI_Sarkisyan_2016	40	4	ndcg	0.15721	Compound-multi	Zero Shot	ESM-2
1613	CAPSD_AAV2S_Sinai_substitutions_2021	160	1	ndcg	0.172645	Compound-multi	Zero Shot	ESM-2
1614	SPG1_STRSG_Olson_2014	160	1	ndcg	0.800692	Compound-multi	Zero Shot	ESM-2
1615	DLG4_HUMAN_Faure_2021	40	3	ndcg	0.241697	Compound-multi	Zero Shot	ESM-2
1616	DLG4_HUMAN_Faure_2021	20	2	ndcg	0.687086	Local-single	Zero Shot	ESM-2
1617	GRB2_HUMAN_Faure_2021	20	5	ndcg	0.209792	Compound-multi	Zero Shot	ESM-2
1618	DLG4_HUMAN_Faure_2021	80	5	ndcg	0.548359	Compound-multi	Zero Shot	ESM-2
1619	DLG4_HUMAN_Faure_2021	20	1	ndcg	0.51654	Compound-multi	Zero Shot	ESM-2
1620	DLG4_HUMAN_Faure_2021	320	3	ndcg	0.527857	Compound-multi	Zero Shot	ESM-2
1621	SPG1_STRSG_Olson_2014	320	2	ndcg	0.598424	Local-single	Zero Shot	ESM-2
1622	A4_HUMAN_Seuma_2021	80	1	ndcg	0.112232	Compound-multi	Zero Shot	ESM-2
1623	SPG1_STRSG_Olson_2014	320	4	ndcg	0.678387	Compound-multi	Zero Shot	ESM-2
1624	CAPSD_AAV2S_Sinai_substitutions_2021	160	3	ndcg	0.433339	Compound-multi	Zero Shot	ESM-2
1625	PABP_YEAST_Melamed_2013	40	1	ndcg	0.635617	Local-single	Zero Shot	ESM-2
1626	GRB2_HUMAN_Faure_2021	80	5	ndcg	0.893463	Local-single	Zero Shot	ESM-2
1627	GRB2_HUMAN_Faure_2021	160	3	ndcg	0.702899	Local-single	Zero Shot	ESM-2
1628	F7YBW8_MESOW_Aakre_2015	20	3	ndcg	0.438914	Compound-multi	Zero Shot	ESM-2
1629	PABP_YEAST_Melamed_2013	20	4	ndcg	0.519123	Compound-multi	Zero Shot	ESM-2
1630	DLG4_HUMAN_Faure_2021	20	1	ndcg	0.852945	Local-single	Zero Shot	ESM-2
1631	A4_HUMAN_Seuma_2021	40	1	ndcg	0.006442	Local-single	Zero Shot	ESM-2
1632	CAPSD_AAV2S_Sinai_substitutions_2021	80	3	ndcg	0.4747	Local-single	Zero Shot	ESM-2
1633	A4_HUMAN_Seuma_2021	80	4	ndcg	0.425135	Compound-multi	Zero Shot	ESM-2
1634	GRB2_HUMAN_Faure_2021	40	1	ndcg	0.47891	Compound-multi	Zero Shot	ESM-2
1635	SPG1_STRSG_Olson_2014	320	2	ndcg	0.668567	Compound-multi	Zero Shot	ESM-2
1636	GFP_AEQVI_Sarkisyan_2016	320	3	ndcg	0.277979	Local-single	Zero Shot	ESM-2
1637	HIS7_YEAST_Pokusaeva_2019	40	4	ndcg	0.368748	Compound-multi	Zero Shot	ESM-2
1638	DLG4_HUMAN_Faure_2021	40	1	ndcg	0.687617	Compound-multi	Zero Shot	ESM-2
1639	A4_HUMAN_Seuma_2021	40	1	ndcg	0.0236859	Compound-multi	Zero Shot	ESM-2
1640	PABP_YEAST_Melamed_2013	20	4	ndcg	0.236303	Local-single	Zero Shot	ESM-2
1641	CAPSD_AAV2S_Sinai_substitutions_2021	80	3	ndcg	0.616904	Compound-multi	Zero Shot	ESM-2
1642	GRB2_HUMAN_Faure_2021	160	3	ndcg	0.664688	Compound-multi	Zero Shot	ESM-2
1643	GFP_AEQVI_Sarkisyan_2016	160	2	ndcg	0.21937	Compound-multi	Zero Shot	ESM-2
1644	SPG1_STRSG_Olson_2014	40	2	ndcg	0.666259	Local-single	Zero Shot	ESM-2
1645	A4_HUMAN_Seuma_2021	20	1	ndcg	0.104329	Local-single	Zero Shot	ESM-2
1646	CAPSD_AAV2S_Sinai_substitutions_2021	40	3	ndcg	0.82665	Local-single	Zero Shot	ESM-2
1647	PABP_YEAST_Melamed_2013	40	4	ndcg	0.862936	Compound-multi	Zero Shot	ESM-2
1648	GRB2_HUMAN_Faure_2021	20	1	ndcg	0.934761	Local-single	Zero Shot	ESM-2
1649	PABP_YEAST_Melamed_2013	320	3	ndcg	0.325096	Local-single	Zero Shot	ESM-2
1650	YAP1_HUMAN_Araya_2012	160	1	ndcg	0.101627	Compound-multi	Zero Shot	ESM-2
1651	A4_HUMAN_Seuma_2021	80	1	ndcg	0.126761	Local-single	Zero Shot	ESM-2
1652	GFP_AEQVI_Sarkisyan_2016	320	5	ndcg	0.33743	Local-single	Zero Shot	ESM-2
1653	CAPSD_AAV2S_Sinai_substitutions_2021	20	4	ndcg	0.344352	Compound-multi	Zero Shot	ESM-2
1654	PABP_YEAST_Melamed_2013	80	1	ndcg	0.679318	Compound-multi	Zero Shot	ESM-2
1655	YAP1_HUMAN_Araya_2012	80	5	ndcg	0.0132935	Compound-multi	Zero Shot	ESM-2
1656	A4_HUMAN_Seuma_2021	320	1	ndcg	0.245211	Compound-multi	Zero Shot	ESM-2
1657	GFP_AEQVI_Sarkisyan_2016	80	4	ndcg	0.071065	Local-single	Zero Shot	ESM-2
1658	SPG1_STRSG_Olson_2014	20	3	ndcg	0.697974	Local-single	Zero Shot	ESM-2
1659	HIS7_YEAST_Pokusaeva_2019	80	3	ndcg	0.502782	Local-single	Zero Shot	ESM-2
1660	PABP_YEAST_Melamed_2013	160	3	ndcg	0.680733	Compound-multi	Zero Shot	ESM-2
1661	A4_HUMAN_Seuma_2021	160	5	ndcg	0.0777842	Local-single	Zero Shot	ESM-2
1662	GRB2_HUMAN_Faure_2021	320	3	ndcg	0.666595	Local-single	Zero Shot	ESM-2
1663	F7YBW8_MESOW_Aakre_2015	20	2	ndcg	0.526346	Local-single	Zero Shot	ESM-2
1664	YAP1_HUMAN_Araya_2012	80	5	ndcg	0.144849	Local-single	Zero Shot	ESM-2
1665	CAPSD_AAV2S_Sinai_substitutions_2021	320	3	ndcg	0.121183	Local-single	Zero Shot	ESM-2
1666	SPG1_STRSG_Olson_2014	160	2	ndcg	0.418355	Local-single	Zero Shot	ESM-2
1667	A4_HUMAN_Seuma_2021	160	1	ndcg	0.136965	Local-single	Zero Shot	ESM-2
1668	PABP_YEAST_Melamed_2013	160	3	ndcg	0.619056	Local-single	Zero Shot	ESM-2
1669	GRB2_HUMAN_Faure_2021	20	1	ndcg	0.249071	Compound-multi	Zero Shot	ESM-2
1670	SPG1_STRSG_Olson_2014	80	5	ndcg	0.758067	Local-single	Zero Shot	ESM-2
1671	YAP1_HUMAN_Araya_2012	160	5	ndcg	0.0514942	Compound-multi	Zero Shot	ESM-2
1672	SPG1_STRSG_Olson_2014	20	3	ndcg	0.559999	Compound-multi	Zero Shot	ESM-2
1673	CAPSD_AAV2S_Sinai_substitutions_2021	320	3	ndcg	0.177062	Compound-multi	Zero Shot	ESM-2
1674	A4_HUMAN_Seuma_2021	160	1	ndcg	0.0283808	Compound-multi	Zero Shot	ESM-2
1675	HIS7_YEAST_Pokusaeva_2019	20	4	ndcg	0.038453	Compound-multi	Zero Shot	ESM-2
1676	GFP_AEQVI_Sarkisyan_2016	160	1	ndcg	0.991138	Compound-multi	Zero Shot	ESM-2
1677	GRB2_HUMAN_Faure_2021	320	3	ndcg	0.596714	Compound-multi	Zero Shot	ESM-2
1678	PABP_YEAST_Melamed_2013	320	3	ndcg	0.284226	Compound-multi	Zero Shot	ESM-2
1679	GFP_AEQVI_Sarkisyan_2016	160	2	ndcg	1.56819	Local-single	Zero Shot	ESM-2
1680	YAP1_HUMAN_Araya_2012	160	5	ndcg	0.0873788	Local-single	Zero Shot	ESM-2
1681	CAPSD_AAV2S_Sinai_substitutions_2021	160	3	ndcg	0.573646	Local-single	Zero Shot	ESM-2
1682	A4_HUMAN_Seuma_2021	20	5	ndcg	0.354394	Local-single	Zero Shot	ESM-2
1683	HIS7_YEAST_Pokusaeva_2019	40	4	ndcg	0.500418	Local-single	Zero Shot	ESM-2
1684	DLG4_HUMAN_Faure_2021	40	1	ndcg	0.73774	Local-single	Zero Shot	ESM-2
1685	GRB2_HUMAN_Faure_2021	40	1	ndcg	0.883998	Local-single	Zero Shot	ESM-2
1686	DLG4_HUMAN_Faure_2021	160	1	ndcg	0.451405	Local-single	Zero Shot	ESM-2
1687	A4_HUMAN_Seuma_2021	80	4	ndcg	0.323363	Local-single	Zero Shot	ESM-2
1688	PABP_YEAST_Melamed_2013	80	4	ndcg	0.447129	Local-single	Zero Shot	ESM-2
1689	SPG1_STRSG_Olson_2014	80	2	ndcg	0.67006	Local-single	Zero Shot	ESM-2
1690	GRB2_HUMAN_Faure_2021	80	3	ndcg	0.646272	Compound-multi	Zero Shot	ESM-2
1691	CAPSD_AAV2S_Sinai_substitutions_2021	20	3	ndcg	0.737303	Compound-multi	Zero Shot	ESM-2
1692	GRB2_HUMAN_Faure_2021	160	1	ndcg	0.48304	Compound-multi	Zero Shot	ESM-2
1693	DLG4_HUMAN_Faure_2021	80	1	ndcg	0.305742	Compound-multi	Zero Shot	ESM-2
1694	DLG4_HUMAN_Faure_2021	20	2	ndcg	0.325728	Compound-multi	Zero Shot	ESM-2
1695	DLG4_HUMAN_Faure_2021	80	5	ndcg	0.548528	Local-single	Zero Shot	ESM-2
1696	DLG4_HUMAN_Faure_2021	160	5	ndcg	0.736437	Local-single	Zero Shot	ESM-2
1697	HIS7_YEAST_Pokusaeva_2019	80	4	ndcg	0.213524	Local-single	Zero Shot	ESM-2
1698	SPG1_STRSG_Olson_2014	320	4	ndcg	0.761122	Local-single	Zero Shot	ESM-2
1699	HIS7_YEAST_Pokusaeva_2019	20	5	ndcg	0.841679	Compound-multi	Zero Shot	ESM-2
1700	CAPSD_AAV2S_Sinai_substitutions_2021	320	2	ndcg	0.0688169	Compound-multi	Zero Shot	ESM-2
1701	DLG4_HUMAN_Faure_2021	320	1	ndcg	0.458364	Compound-multi	Zero Shot	ESM-2
1702	GRB2_HUMAN_Faure_2021	80	1	ndcg	0.775557	Local-single	Zero Shot	ESM-2
1703	CAPSD_AAV2S_Sinai_substitutions_2021	320	2	ndcg	0.0388884	Local-single	Zero Shot	ESM-2
1704	PABP_YEAST_Melamed_2013	160	4	ndcg	0.467052	Compound-multi	Zero Shot	ESM-2
1705	HIS7_YEAST_Pokusaeva_2019	40	1	ndcg	0.830024	Compound-multi	Zero Shot	ESM-2
1706	YAP1_HUMAN_Araya_2012	80	1	ndcg	0.238805	Compound-multi	Zero Shot	ESM-2
1707	DLG4_HUMAN_Faure_2021	160	5	ndcg	0.699039	Compound-multi	Zero Shot	ESM-2
1708	PABP_YEAST_Melamed_2013	160	4	ndcg	0.580038	Local-single	Zero Shot	ESM-2
1709	GFP_AEQVI_Sarkisyan_2016	80	2	ndcg	1.70151	Local-single	Zero Shot	ESM-2
1710	DLG4_HUMAN_Faure_2021	320	1	ndcg	0.751674	Local-single	Zero Shot	ESM-2
1711	GRB2_HUMAN_Faure_2021	40	3	ndcg	0.722588	Local-single	Zero Shot	ESM-2
1712	DLG4_HUMAN_Faure_2021	320	5	ndcg	0.682139	Compound-multi	Zero Shot	ESM-2
1713	A4_HUMAN_Seuma_2021	320	5	ndcg	0.182787	Compound-multi	Zero Shot	ESM-2
1714	CAPSD_AAV2S_Sinai_substitutions_2021	20	3	ndcg	0.312482	Local-single	Zero Shot	ESM-2
1715	YAP1_HUMAN_Araya_2012	80	1	ndcg	0.375701	Local-single	Zero Shot	ESM-2
1716	GRB2_HUMAN_Faure_2021	320	5	ndcg	0.77576	Local-single	Zero Shot	ESM-2
1717	A4_HUMAN_Seuma_2021	20	1	ndcg	0.200782	Compound-multi	Zero Shot	ESM-2
1718	CAPSD_AAV2S_Sinai_substitutions_2021	40	3	ndcg	0.176376	Compound-multi	Zero Shot	ESM-2
1719	GFP_AEQVI_Sarkisyan_2016	160	1	ndcg	0.724257	Local-single	Zero Shot	ESM-2
1720	PABP_YEAST_Melamed_2013	40	4	ndcg	0.62947	Local-single	Zero Shot	ESM-2
1721	DLG4_HUMAN_Faure_2021	80	1	ndcg	0.631942	Local-single	Zero Shot	ESM-2
1722	GRB2_HUMAN_Faure_2021	80	3	ndcg	0.785572	Local-single	Zero Shot	ESM-2
1723	A4_HUMAN_Seuma_2021	20	5	ndcg	0.356787	Compound-multi	Zero Shot	ESM-2
1724	SPG1_STRSG_Olson_2014	160	2	ndcg	0.447823	Compound-multi	Zero Shot	ESM-2
1725	SPG1_STRSG_Olson_2014	80	5	ndcg	0.483896	Compound-multi	Zero Shot	ESM-2
1726	PABP_YEAST_Melamed_2013	320	4	ndcg	0.463618	Compound-multi	Zero Shot	ESM-2
1727	GCN4_YEAST_Staller_induction_2018	20	3	ndcg	0.559236	Local-single	Zero Shot	ESM-2
1728	DLG4_HUMAN_Faure_2021	320	5	ndcg	0.663978	Local-single	Zero Shot	ESM-2
1729	HIS7_YEAST_Pokusaeva_2019	80	4	ndcg	0.313342	Compound-multi	Zero Shot	ESM-2
1730	CAPSD_AAV2S_Sinai_substitutions_2021	160	2	ndcg	0.0510288	Local-single	Zero Shot	ESM-2
1731	GRB2_HUMAN_Faure_2021	80	1	ndcg	0.557503	Compound-multi	Zero Shot	ESM-2
1732	PABP_YEAST_Melamed_2013	80	4	ndcg	0.632735	Compound-multi	Zero Shot	ESM-2
1733	GFP_AEQVI_Sarkisyan_2016	320	1	ndcg	0.969819	Compound-multi	Zero Shot	ESM-2
1734	DLG4_HUMAN_Faure_2021	160	1	ndcg	0.379387	Compound-multi	Zero Shot	ESM-2
1735	F7YBW8_MESOW_Aakre_2015	20	3	ndcg	0.526346	Local-single	Zero Shot	ESM-2
1736	GRB2_HUMAN_Faure_2021	40	5	ndcg	0.397801	Compound-multi	Zero Shot	ESM-2
1737	F7YBW8_MESOW_Aakre_2015	20	4	ndcg	0.430799	Compound-multi	Zero Shot	ESM-2
1738	GFP_AEQVI_Sarkisyan_2016	80	4	ndcg	0.12478	Compound-multi	Zero Shot	ESM-2
1739	SPG1_STRSG_Olson_2014	80	2	ndcg	0.194989	Compound-multi	Zero Shot	ESM-2
1740	PABP_YEAST_Melamed_2013	20	1	ndcg	0.0422425	Compound-multi	Supervised	LR
1741	A4_HUMAN_Seuma_2021	320	5	ndcg	0.659155	Compound-multi	Supervised	LR
1742	A4_HUMAN_Seuma_2021	80	5	ndcg	0.514457	Local-single	Supervised	LR
1743	GFP_AEQVI_Sarkisyan_2016	40	3	ndcg	0.417678	Compound-multi	Supervised	LR
1744	GRB2_HUMAN_Faure_2021	80	5	ndcg	0.749785	Local-single	Supervised	LR
1745	GRB2_HUMAN_Faure_2021	80	5	ndcg	0.780471	Compound-multi	Supervised	LR
1746	PABP_YEAST_Melamed_2013	80	1	ndcg	0.638547	Compound-multi	Supervised	LR
1747	A4_HUMAN_Seuma_2021	160	5	ndcg	0.647357	Local-single	Supervised	LR
1748	PABP_YEAST_Melamed_2013	20	1	ndcg	0.81971	Local-single	Supervised	LR
1749	GRB2_HUMAN_Faure_2021	40	5	ndcg	0.425339	Compound-multi	Supervised	LR
1750	GFP_AEQVI_Sarkisyan_2016	40	3	ndcg	0.762415	Local-single	Supervised	LR
1751	A4_HUMAN_Seuma_2021	80	5	ndcg	0.472688	Compound-multi	Supervised	LR
1752	GFP_AEQVI_Sarkisyan_2016	80	3	ndcg	0.0111542	Local-single	Supervised	LR
1753	A4_HUMAN_Seuma_2021	320	5	ndcg	0.413392	Local-single	Supervised	LR
1754	GRB2_HUMAN_Faure_2021	20	5	ndcg	0.708895	Local-single	Supervised	LR
1755	PABP_YEAST_Melamed_2013	40	1	ndcg	0.820802	Local-single	Supervised	LR
1756	GRB2_HUMAN_Faure_2021	40	5	ndcg	0.940868	Local-single	Supervised	LR
1757	PABP_YEAST_Melamed_2013	40	1	ndcg	0.369237	Compound-multi	Supervised	LR
1758	A4_HUMAN_Seuma_2021	160	5	ndcg	0.456781	Compound-multi	Supervised	LR
1759	GRB2_HUMAN_Faure_2021	20	5	ndcg	0.200811	Compound-multi	Supervised	LR
1760	PABP_YEAST_Melamed_2013	80	1	ndcg	0.644258	Local-single	Supervised	LR
1761	GFP_AEQVI_Sarkisyan_2016	80	3	ndcg	0.363545	Compound-multi	Supervised	LR
1762	GFP_AEQVI_Sarkisyan_2016	160	4	ndcg	0.547143	Local-single	Supervised	LR
1763	GRB2_HUMAN_Faure_2021	320	4	ndcg	0.449648	Local-single	Supervised	LR
1764	CAPSD_AAV2S_Sinai_substitutions_2021	160	2	ndcg	0.554668	Compound-multi	Supervised	LR
1765	CAPSD_AAV2S_Sinai_substitutions_2021	160	2	ndcg	0.677849	Local-single	Supervised	LR
1766	GRB2_HUMAN_Faure_2021	80	1	ndcg	0.729958	Local-single	Supervised	LR
1767	GFP_AEQVI_Sarkisyan_2016	40	4	ndcg	0.785867	Local-single	Supervised	LR
1768	CAPSD_AAV2S_Sinai_substitutions_2021	320	2	ndcg	0.0194047	Compound-multi	Supervised	LR
1769	CAPSD_AAV2S_Sinai_substitutions_2021	320	2	ndcg	0.787974	Local-single	Supervised	LR
1770	GRB2_HUMAN_Faure_2021	80	1	ndcg	0.887641	Compound-multi	Supervised	LR
1771	GFP_AEQVI_Sarkisyan_2016	160	1	ndcg	0.662028	Local-single	Supervised	LR
1772	GRB2_HUMAN_Faure_2021	160	1	ndcg	0.095513	Compound-multi	Supervised	LR
1773	CAPSD_AAV2S_Sinai_substitutions_2021	20	3	ndcg	0.809119	Compound-multi	Supervised	LR
1774	GRB2_HUMAN_Faure_2021	40	1	ndcg	0.826649	Local-single	Supervised	LR
1775	CAPSD_AAV2S_Sinai_substitutions_2021	40	3	ndcg	0.846056	Compound-multi	Supervised	LR
1776	CAPSD_AAV2S_Sinai_substitutions_2021	40	3	ndcg	0.595512	Local-single	Supervised	LR
1777	GRB2_HUMAN_Faure_2021	40	1	ndcg	0.544027	Compound-multi	Supervised	LR
1778	GFP_AEQVI_Sarkisyan_2016	160	1	ndcg	0.551518	Compound-multi	Supervised	LR
1779	CAPSD_AAV2S_Sinai_substitutions_2021	80	3	ndcg	0.636928	Compound-multi	Supervised	LR
1780	GFP_AEQVI_Sarkisyan_2016	80	4	ndcg	0.698872	Compound-multi	Supervised	LR
1781	GRB2_HUMAN_Faure_2021	20	1	ndcg	0.906714	Local-single	Supervised	LR
1782	CAPSD_AAV2S_Sinai_substitutions_2021	20	3	ndcg	0.68072	Local-single	Supervised	LR
1783	CAPSD_AAV2S_Sinai_substitutions_2021	80	2	ndcg	0.457753	Local-single	Supervised	LR
1784	GFP_AEQVI_Sarkisyan_2016	320	1	ndcg	0.289839	Compound-multi	Supervised	LR
1785	GRB2_HUMAN_Faure_2021	160	1	ndcg	0.218185	Local-single	Supervised	LR
1786	CAPSD_AAV2S_Sinai_substitutions_2021	80	1	ndcg	0.139566	Compound-multi	Supervised	LR
1787	CAPSD_AAV2S_Sinai_substitutions_2021	80	1	ndcg	0.869102	Local-single	Supervised	LR
1788	GRB2_HUMAN_Faure_2021	40	2	ndcg	0.060438	Compound-multi	Supervised	LR
1789	GFP_AEQVI_Sarkisyan_2016	20	2	ndcg	0.428972	Compound-multi	Supervised	LR
1790	CAPSD_AAV2S_Sinai_substitutions_2021	160	1	ndcg	0.398733	Compound-multi	Supervised	LR
1791	GRB2_HUMAN_Faure_2021	20	2	ndcg	0.614987	Local-single	Supervised	LR
1792	CAPSD_AAV2S_Sinai_substitutions_2021	160	1	ndcg	0.333662	Local-single	Supervised	LR
1793	CAPSD_AAV2S_Sinai_substitutions_2021	320	1	ndcg	0.109903	Compound-multi	Supervised	LR
1794	GRB2_HUMAN_Faure_2021	160	5	ndcg	0.308779	Compound-multi	Supervised	LR
1795	CAPSD_AAV2S_Sinai_substitutions_2021	320	1	ndcg	0.532213	Local-single	Supervised	LR
1796	GFP_AEQVI_Sarkisyan_2016	40	4	ndcg	0.815964	Compound-multi	Supervised	LR
1797	GFP_AEQVI_Sarkisyan_2016	320	1	ndcg	0.09086	Local-single	Supervised	LR
1798	CAPSD_AAV2S_Sinai_substitutions_2021	20	2	ndcg	0.589775	Compound-multi	Supervised	LR
1799	GRB2_HUMAN_Faure_2021	320	1	ndcg	0.128946	Local-single	Supervised	LR
1800	CAPSD_AAV2S_Sinai_substitutions_2021	20	2	ndcg	0.235393	Local-single	Supervised	LR
1801	CAPSD_AAV2S_Sinai_substitutions_2021	40	2	ndcg	0.132301	Compound-multi	Supervised	LR
1802	GRB2_HUMAN_Faure_2021	320	1	ndcg	0.0117428	Compound-multi	Supervised	LR
1803	CAPSD_AAV2S_Sinai_substitutions_2021	40	2	ndcg	0.539769	Local-single	Supervised	LR
1804	CAPSD_AAV2S_Sinai_substitutions_2021	80	2	ndcg	0.532573	Compound-multi	Supervised	LR
1805	CAPSD_AAV2S_Sinai_substitutions_2021	80	3	ndcg	0.824933	Local-single	Supervised	LR
1806	GRB2_HUMAN_Faure_2021	40	2	ndcg	0.48493	Local-single	Supervised	LR
1807	CAPSD_AAV2S_Sinai_substitutions_2021	160	3	ndcg	0.570922	Compound-multi	Supervised	LR
1808	CAPSD_AAV2S_Sinai_substitutions_2021	160	3	ndcg	0.84853	Local-single	Supervised	LR
1809	CAPSD_AAV2S_Sinai_substitutions_2021	20	5	ndcg	0.473944	Compound-multi	Supervised	LR
1810	CAPSD_AAV2S_Sinai_substitutions_2021	20	5	ndcg	0.655406	Local-single	Supervised	LR
1811	GFP_AEQVI_Sarkisyan_2016	40	5	ndcg	0.035541	Compound-multi	Supervised	LR
1812	GFP_AEQVI_Sarkisyan_2016	40	1	ndcg	0.74492	Compound-multi	Supervised	LR
1813	GFP_AEQVI_Sarkisyan_2016	160	4	ndcg	0.712488	Compound-multi	Supervised	LR
1814	CAPSD_AAV2S_Sinai_substitutions_2021	40	5	ndcg	0.435681	Compound-multi	Supervised	LR
1815	GFP_AEQVI_Sarkisyan_2016	20	5	ndcg	0.815344	Local-single	Supervised	LR
1816	CAPSD_AAV2S_Sinai_substitutions_2021	40	5	ndcg	0.334869	Local-single	Supervised	LR
1817	GFP_AEQVI_Sarkisyan_2016	40	5	ndcg	0.585654	Local-single	Supervised	LR
1818	CAPSD_AAV2S_Sinai_substitutions_2021	80	5	ndcg	0.625045	Compound-multi	Supervised	LR
1819	GFP_AEQVI_Sarkisyan_2016	20	1	ndcg	0.858026	Local-single	Supervised	LR
1820	CAPSD_AAV2S_Sinai_substitutions_2021	80	5	ndcg	0.865564	Local-single	Supervised	LR
1821	CAPSD_AAV2S_Sinai_substitutions_2021	160	5	ndcg	0.527238	Compound-multi	Supervised	LR
1822	GFP_AEQVI_Sarkisyan_2016	320	4	ndcg	0.407023	Local-single	Supervised	LR
1823	CAPSD_AAV2S_Sinai_substitutions_2021	160	5	ndcg	0.763947	Local-single	Supervised	LR
1824	CAPSD_AAV2S_Sinai_substitutions_2021	320	5	ndcg	0.366521	Compound-multi	Supervised	LR
1825	GFP_AEQVI_Sarkisyan_2016	320	4	ndcg	0.424574	Compound-multi	Supervised	LR
1826	CAPSD_AAV2S_Sinai_substitutions_2021	320	5	ndcg	0.567554	Local-single	Supervised	LR
1827	GFP_AEQVI_Sarkisyan_2016	20	5	ndcg	0.588262	Compound-multi	Supervised	LR
1828	CAPSD_AAV2S_Sinai_substitutions_2021	320	4	ndcg	0.607742	Local-single	Supervised	LR
1829	CAPSD_AAV2S_Sinai_substitutions_2021	320	4	ndcg	0.174139	Compound-multi	Supervised	LR
1830	GFP_AEQVI_Sarkisyan_2016	80	5	ndcg	0.376994	Compound-multi	Supervised	LR
1831	GFP_AEQVI_Sarkisyan_2016	80	1	ndcg	0.522661	Local-single	Supervised	LR
1832	CAPSD_AAV2S_Sinai_substitutions_2021	320	3	ndcg	0.265208	Compound-multi	Supervised	LR
1833	GFP_AEQVI_Sarkisyan_2016	320	5	ndcg	0.355322	Local-single	Supervised	LR
1834	CAPSD_AAV2S_Sinai_substitutions_2021	320	3	ndcg	0.625829	Local-single	Supervised	LR
1835	CAPSD_AAV2S_Sinai_substitutions_2021	20	4	ndcg	0.70517	Compound-multi	Supervised	LR
1836	GFP_AEQVI_Sarkisyan_2016	320	5	ndcg	0.502091	Compound-multi	Supervised	LR
1837	CAPSD_AAV2S_Sinai_substitutions_2021	20	4	ndcg	0.850226	Local-single	Supervised	LR
1838	CAPSD_AAV2S_Sinai_substitutions_2021	40	4	ndcg	0.408721	Compound-multi	Supervised	LR
1839	GFP_AEQVI_Sarkisyan_2016	160	5	ndcg	0.27094	Local-single	Supervised	LR
1840	GFP_AEQVI_Sarkisyan_2016	80	1	ndcg	0.64653	Compound-multi	Supervised	LR
1841	CAPSD_AAV2S_Sinai_substitutions_2021	40	4	ndcg	0.521047	Local-single	Supervised	LR
1842	GFP_AEQVI_Sarkisyan_2016	160	5	ndcg	0.405048	Compound-multi	Supervised	LR
1843	CAPSD_AAV2S_Sinai_substitutions_2021	80	4	ndcg	0.487269	Compound-multi	Supervised	LR
1844	GFP_AEQVI_Sarkisyan_2016	80	4	ndcg	0.704702	Local-single	Supervised	LR
1845	CAPSD_AAV2S_Sinai_substitutions_2021	80	4	ndcg	0.613035	Local-single	Supervised	LR
1846	GFP_AEQVI_Sarkisyan_2016	80	5	ndcg	0.633591	Local-single	Supervised	LR
1847	CAPSD_AAV2S_Sinai_substitutions_2021	160	4	ndcg	0.424461	Compound-multi	Supervised	LR
1848	GFP_AEQVI_Sarkisyan_2016	40	1	ndcg	0.482445	Local-single	Supervised	LR
1849	CAPSD_AAV2S_Sinai_substitutions_2021	160	4	ndcg	0.491505	Local-single	Supervised	LR
1850	GRB2_HUMAN_Faure_2021	20	1	ndcg	0.64142	Compound-multi	Supervised	LR
1851	CAPSD_AAV2S_Sinai_substitutions_2021	40	1	ndcg	0.631548	Local-single	Supervised	LR
1852	CAPSD_AAV2S_Sinai_substitutions_2021	40	1	ndcg	0.65102	Compound-multi	Supervised	LR
1853	GRB2_HUMAN_Faure_2021	80	2	ndcg	0.513286	Compound-multi	Supervised	LR
1854	GRB2_HUMAN_Faure_2021	40	4	ndcg	0.726548	Compound-multi	Supervised	LR
1855	GFP_AEQVI_Sarkisyan_2016	160	3	ndcg	0.306049	Local-single	Supervised	LR
1856	GFP_AEQVI_Sarkisyan_2016	320	2	ndcg	1.23685	Compound-multi	Supervised	LR
1857	PABP_YEAST_Melamed_2013	20	3	ndcg	0.45764	Compound-multi	Supervised	LR
1858	GRB2_HUMAN_Faure_2021	20	4	ndcg	0.798552	Local-single	Supervised	LR
1859	PABP_YEAST_Melamed_2013	20	3	ndcg	0.628935	Local-single	Supervised	LR
1860	PABP_YEAST_Melamed_2013	40	3	ndcg	0.0320629	Compound-multi	Supervised	LR
1861	GRB2_HUMAN_Faure_2021	20	4	ndcg	0.842949	Compound-multi	Supervised	LR
1862	PABP_YEAST_Melamed_2013	320	2	ndcg	0.267886	Local-single	Supervised	LR
1863	PABP_YEAST_Melamed_2013	40	3	ndcg	0.722075	Local-single	Supervised	LR
1864	PABP_YEAST_Melamed_2013	80	3	ndcg	0.516098	Compound-multi	Supervised	LR
1865	GRB2_HUMAN_Faure_2021	320	3	ndcg	0.139407	Local-single	Supervised	LR
1866	PABP_YEAST_Melamed_2013	80	3	ndcg	0.564659	Local-single	Supervised	LR
1867	PABP_YEAST_Melamed_2013	160	3	ndcg	0.571282	Compound-multi	Supervised	LR
1868	GRB2_HUMAN_Faure_2021	320	3	ndcg	0.253935	Compound-multi	Supervised	LR
1869	PABP_YEAST_Melamed_2013	160	3	ndcg	0.75734	Local-single	Supervised	LR
1870	PABP_YEAST_Melamed_2013	320	3	ndcg	0.07662	Compound-multi	Supervised	LR
1871	GRB2_HUMAN_Faure_2021	160	3	ndcg	0.651743	Local-single	Supervised	LR
1872	GFP_AEQVI_Sarkisyan_2016	160	2	ndcg	0.470849	Local-single	Supervised	LR
1873	PABP_YEAST_Melamed_2013	320	2	ndcg	0.313322	Compound-multi	Supervised	LR
1874	GRB2_HUMAN_Faure_2021	40	4	ndcg	0.777325	Local-single	Supervised	LR
1875	PABP_YEAST_Melamed_2013	160	2	ndcg	0.496211	Local-single	Supervised	LR
1876	GFP_AEQVI_Sarkisyan_2016	20	3	ndcg	0.232345	Local-single	Supervised	LR
1877	PABP_YEAST_Melamed_2013	160	1	ndcg	0.703315	Local-single	Supervised	LR
1878	PABP_YEAST_Melamed_2013	320	1	ndcg	0.258703	Compound-multi	Supervised	LR
1879	GRB2_HUMAN_Faure_2021	320	4	ndcg	0.142497	Compound-multi	Supervised	LR
1880	PABP_YEAST_Melamed_2013	320	1	ndcg	0.232824	Local-single	Supervised	LR
1881	PABP_YEAST_Melamed_2013	20	2	ndcg	0.255013	Compound-multi	Supervised	LR
1882	GRB2_HUMAN_Faure_2021	160	4	ndcg	0.568054	Local-single	Supervised	LR
1883	GFP_AEQVI_Sarkisyan_2016	20	3	ndcg	0.0705319	Compound-multi	Supervised	LR
1884	PABP_YEAST_Melamed_2013	20	2	ndcg	0.479896	Local-single	Supervised	LR
1885	GFP_AEQVI_Sarkisyan_2016	160	3	ndcg	0.24334	Compound-multi	Supervised	LR
1886	GRB2_HUMAN_Faure_2021	160	4	ndcg	0.179182	Compound-multi	Supervised	LR
1887	PABP_YEAST_Melamed_2013	40	2	ndcg	0.812829	Compound-multi	Supervised	LR
1888	PABP_YEAST_Melamed_2013	40	2	ndcg	0.747342	Local-single	Supervised	LR
1889	GRB2_HUMAN_Faure_2021	80	4	ndcg	0.883789	Local-single	Supervised	LR
1890	PABP_YEAST_Melamed_2013	80	2	ndcg	0.444779	Compound-multi	Supervised	LR
1891	PABP_YEAST_Melamed_2013	80	2	ndcg	0.959146	Local-single	Supervised	LR
1892	GRB2_HUMAN_Faure_2021	80	4	ndcg	0.714543	Compound-multi	Supervised	LR
1893	GFP_AEQVI_Sarkisyan_2016	320	2	ndcg	0.229501	Local-single	Supervised	LR
1894	PABP_YEAST_Melamed_2013	160	2	ndcg	0.131761	Compound-multi	Supervised	LR
1895	GFP_AEQVI_Sarkisyan_2016	320	3	ndcg	0.392442	Compound-multi	Supervised	LR
1896	GFP_AEQVI_Sarkisyan_2016	160	2	ndcg	0.593197	Compound-multi	Supervised	LR
1897	PABP_YEAST_Melamed_2013	320	3	ndcg	0.484662	Local-single	Supervised	LR
1898	GRB2_HUMAN_Faure_2021	160	3	ndcg	0.342083	Compound-multi	Supervised	LR
1899	GFP_AEQVI_Sarkisyan_2016	40	2	ndcg	0.729747	Local-single	Supervised	LR
1900	PABP_YEAST_Melamed_2013	40	5	ndcg	0.704423	Local-single	Supervised	LR
1901	GFP_AEQVI_Sarkisyan_2016	20	4	ndcg	0.712553	Compound-multi	Supervised	LR
1902	PABP_YEAST_Melamed_2013	80	5	ndcg	0.110498	Compound-multi	Supervised	LR
1903	GRB2_HUMAN_Faure_2021	320	2	ndcg	0.614872	Compound-multi	Supervised	LR
1904	PABP_YEAST_Melamed_2013	80	5	ndcg	0.386591	Local-single	Supervised	LR
1905	PABP_YEAST_Melamed_2013	160	5	ndcg	0.227527	Compound-multi	Supervised	LR
1906	GRB2_HUMAN_Faure_2021	160	2	ndcg	0.430448	Local-single	Supervised	LR
1907	GFP_AEQVI_Sarkisyan_2016	40	2	ndcg	0.129183	Compound-multi	Supervised	LR
1908	GFP_AEQVI_Sarkisyan_2016	20	1	ndcg	0.681892	Compound-multi	Supervised	LR
1909	PABP_YEAST_Melamed_2013	160	5	ndcg	0.765993	Local-single	Supervised	LR
1910	GRB2_HUMAN_Faure_2021	160	2	ndcg	0.331225	Compound-multi	Supervised	LR
1911	PABP_YEAST_Melamed_2013	320	5	ndcg	0.439698	Compound-multi	Supervised	LR
1912	PABP_YEAST_Melamed_2013	320	5	ndcg	0.512633	Local-single	Supervised	LR
1913	GRB2_HUMAN_Faure_2021	80	2	ndcg	0.646951	Local-single	Supervised	LR
1914	CAPSD_AAV2S_Sinai_substitutions_2021	20	1	ndcg	0.324309	Compound-multi	Supervised	LR
1915	GFP_AEQVI_Sarkisyan_2016	20	2	ndcg	0.850366	Local-single	Supervised	LR
1916	CAPSD_AAV2S_Sinai_substitutions_2021	20	1	ndcg	0.910015	Local-single	Supervised	LR
1917	GFP_AEQVI_Sarkisyan_2016	20	4	ndcg	0.655553	Local-single	Supervised	LR
1918	GRB2_HUMAN_Faure_2021	320	2	ndcg	0.616704	Local-single	Supervised	LR
1919	PABP_YEAST_Melamed_2013	160	1	ndcg	0.466867	Compound-multi	Supervised	LR
1920	PABP_YEAST_Melamed_2013	40	5	ndcg	0.297371	Compound-multi	Supervised	LR
1921	GRB2_HUMAN_Faure_2021	20	3	ndcg	0.721925	Compound-multi	Supervised	LR
1922	PABP_YEAST_Melamed_2013	20	4	ndcg	0.727058	Compound-multi	Supervised	LR
1923	PABP_YEAST_Melamed_2013	20	4	ndcg	0.791663	Local-single	Supervised	LR
1924	GRB2_HUMAN_Faure_2021	80	3	ndcg	0.351503	Local-single	Supervised	LR
1925	PABP_YEAST_Melamed_2013	40	4	ndcg	0.387403	Compound-multi	Supervised	LR
1926	GFP_AEQVI_Sarkisyan_2016	80	2	ndcg	0.0497256	Local-single	Supervised	LR
1927	PABP_YEAST_Melamed_2013	40	4	ndcg	0.717852	Local-single	Supervised	LR
1928	GRB2_HUMAN_Faure_2021	80	3	ndcg	0.336712	Compound-multi	Supervised	LR
1929	PABP_YEAST_Melamed_2013	80	4	ndcg	0.371993	Compound-multi	Supervised	LR
1930	PABP_YEAST_Melamed_2013	80	4	ndcg	0.538792	Local-single	Supervised	LR
1931	GRB2_HUMAN_Faure_2021	40	3	ndcg	0.837671	Local-single	Supervised	LR
1932	GFP_AEQVI_Sarkisyan_2016	320	3	ndcg	0.668609	Local-single	Supervised	LR
1933	PABP_YEAST_Melamed_2013	160	4	ndcg	0.214784	Compound-multi	Supervised	LR
1934	GFP_AEQVI_Sarkisyan_2016	80	2	ndcg	0.372862	Compound-multi	Supervised	LR
1935	PABP_YEAST_Melamed_2013	160	4	ndcg	0.469241	Local-single	Supervised	LR
1936	GRB2_HUMAN_Faure_2021	40	3	ndcg	0.241347	Compound-multi	Supervised	LR
1937	PABP_YEAST_Melamed_2013	320	4	ndcg	0.5544	Compound-multi	Supervised	LR
1938	GRB2_HUMAN_Faure_2021	20	3	ndcg	0.345344	Local-single	Supervised	LR
1939	PABP_YEAST_Melamed_2013	320	4	ndcg	0.540198	Local-single	Supervised	LR
1940	PABP_YEAST_Melamed_2013	20	5	ndcg	0.898081	Compound-multi	Supervised	LR
1941	PABP_YEAST_Melamed_2013	20	5	ndcg	0.560693	Local-single	Supervised	LR
1942	GRB2_HUMAN_Faure_2021	20	2	ndcg	0.68116	Compound-multi	Supervised	LR
1943	A4_HUMAN_Seuma_2021	80	4	ndcg	0.544929	Compound-multi	Supervised	LR
1944	DLG4_HUMAN_Faure_2021	80	1	ndcg	0.223948	Compound-multi	Supervised	LR
1945	A4_HUMAN_Seuma_2021	320	3	ndcg	0.508808	Compound-multi	Supervised	LR
1946	SPG1_STRSG_Olson_2014	160	2	ndcg	0.591131	Local-single	Supervised	LR
1947	DLG4_HUMAN_Faure_2021	40	1	ndcg	0.729034	Compound-multi	Supervised	LR
1948	SPG1_STRSG_Olson_2014	20	5	ndcg	0.785569	Local-single	Supervised	LR
1949	HIS7_YEAST_Pokusaeva_2019	80	1	ndcg	0.305386	Local-single	Supervised	LR
1950	F7YBW8_MESOW_Aakre_2015	20	5	ndcg	0.919121	Local-single	Supervised	LR
1951	DLG4_HUMAN_Faure_2021	40	4	ndcg	0.168012	Compound-multi	Supervised	LR
1952	DLG4_HUMAN_Faure_2021	20	1	ndcg	0.93209	Local-single	Supervised	LR
1953	SPG1_STRSG_Olson_2014	20	1	ndcg	0.842888	Compound-multi	Supervised	LR
1954	YAP1_HUMAN_Araya_2012	20	1	ndcg	0.113164	Compound-multi	Supervised	LR
1955	A4_HUMAN_Seuma_2021	160	3	ndcg	0.286416	Local-single	Supervised	LR
1956	SPG1_STRSG_Olson_2014	40	4	ndcg	0.941408	Local-single	Supervised	LR
1957	YAP1_HUMAN_Araya_2012	80	4	ndcg	0.140587	Compound-multi	Supervised	LR
1958	A4_HUMAN_Seuma_2021	40	2	ndcg	0.70929	Compound-multi	Supervised	LR
1959	DLG4_HUMAN_Faure_2021	40	4	ndcg	0.627375	Local-single	Supervised	LR
1960	DLG4_HUMAN_Faure_2021	160	5	ndcg	0.359982	Compound-multi	Supervised	LR
1961	SPG1_STRSG_Olson_2014	20	5	ndcg	0.622928	Compound-multi	Supervised	LR
1962	A4_HUMAN_Seuma_2021	160	3	ndcg	0.534955	Compound-multi	Supervised	LR
1963	SPG1_STRSG_Olson_2014	320	2	ndcg	0.724692	Compound-multi	Supervised	LR
1964	HIS7_YEAST_Pokusaeva_2019	20	2	ndcg	0.555275	Compound-multi	Supervised	LR
1965	A4_HUMAN_Seuma_2021	40	2	ndcg	0.851878	Local-single	Supervised	LR
1966	YAP1_HUMAN_Araya_2012	20	1	ndcg	0.780165	Local-single	Supervised	LR
1967	DLG4_HUMAN_Faure_2021	20	1	ndcg	0.802169	Compound-multi	Supervised	LR
1968	DLG4_HUMAN_Faure_2021	80	4	ndcg	0.389952	Compound-multi	Supervised	LR
1969	YAP1_HUMAN_Araya_2012	80	4	ndcg	0.743161	Local-single	Supervised	LR
1970	A4_HUMAN_Seuma_2021	80	3	ndcg	0.208186	Local-single	Supervised	LR
1971	HIS7_YEAST_Pokusaeva_2019	80	5	ndcg	0.222405	Local-single	Supervised	LR
1972	HIS7_YEAST_Pokusaeva_2019	20	3	ndcg	0.850141	Local-single	Supervised	LR
1973	YAP1_HUMAN_Araya_2012	80	2	ndcg	0.488717	Local-single	Supervised	LR
1974	DLG4_HUMAN_Faure_2021	160	5	ndcg	0.598843	Local-single	Supervised	LR
1975	SPG1_STRSG_Olson_2014	80	3	ndcg	0.607498	Local-single	Supervised	LR
1976	HIS7_YEAST_Pokusaeva_2019	80	4	ndcg	0.0199235	Compound-multi	Supervised	LR
1977	A4_HUMAN_Seuma_2021	20	2	ndcg	0.810977	Compound-multi	Supervised	LR
1978	DLG4_HUMAN_Faure_2021	80	1	ndcg	0.703037	Local-single	Supervised	LR
1979	SPG1_STRSG_Olson_2014	40	5	ndcg	0.758174	Local-single	Supervised	LR
1980	HIS7_YEAST_Pokusaeva_2019	40	1	ndcg	0.641697	Local-single	Supervised	LR
1981	DLG4_HUMAN_Faure_2021	320	3	ndcg	0.182225	Compound-multi	Supervised	LR
1982	SPG1_STRSG_Olson_2014	40	4	ndcg	0.595679	Compound-multi	Supervised	LR
1983	A4_HUMAN_Seuma_2021	20	4	ndcg	0.98434	Local-single	Supervised	LR
1984	F7YBW8_MESOW_Aakre_2015	20	4	ndcg	0.433055	Compound-multi	Supervised	LR
1985	YAP1_HUMAN_Araya_2012	40	4	ndcg	0.798599	Compound-multi	Supervised	LR
1986	DLG4_HUMAN_Faure_2021	320	3	ndcg	0.493927	Local-single	Supervised	LR
1987	YAP1_HUMAN_Araya_2012	160	2	ndcg	0.651769	Local-single	Supervised	LR
1988	DLG4_HUMAN_Faure_2021	320	5	ndcg	0.490131	Compound-multi	Supervised	LR
1989	YAP1_HUMAN_Araya_2012	20	2	ndcg	0.984593	Local-single	Supervised	LR
1990	SPG1_STRSG_Olson_2014	40	1	ndcg	0.283869	Compound-multi	Supervised	LR
1991	SPG1_STRSG_Olson_2014	160	2	ndcg	0.597409	Compound-multi	Supervised	LR
1992	A4_HUMAN_Seuma_2021	20	4	ndcg	0.892607	Compound-multi	Supervised	LR
1993	A4_HUMAN_Seuma_2021	20	2	ndcg	0.844995	Local-single	Supervised	LR
1994	F7YBW8_MESOW_Aakre_2015	20	4	ndcg	0.83625	Local-single	Supervised	LR
1995	HIS7_YEAST_Pokusaeva_2019	80	1	ndcg	0.12256	Compound-multi	Supervised	LR
1996	DLG4_HUMAN_Faure_2021	20	4	ndcg	0.557738	Compound-multi	Supervised	LR
1997	SPG1_STRSG_Olson_2014	40	5	ndcg	0.544126	Compound-multi	Supervised	LR
1998	YAP1_HUMAN_Araya_2012	40	4	ndcg	0.577634	Local-single	Supervised	LR
[truncated: 2,351 more rows]
